# Supplementary material for: Geomagnetic and visual cues guide seasonal migratory orientation in the nocturnal fall armyworm, the world’s most invasive insect
Source: eLife. 2026 Apr 16;14:RP109098. doi: 10.7554/eLife.109098 (PMC13086496; doi:10.7554/eLife.109098)
Supplement: Figure 2—figure supplement 1—source data 1. [file elife-109098-fig2-figsupp1-data1.xlsx]

## Sheet: Figure 2-figure supplement 1 A-
x-nouth	y-east	z-down	Type	Experiment	Intensity（E）	Intensity（H）	Azimuth	Inclination
-34.05	3.6	25.62	CMF	Spring Exp.Group (Field-captured)	42.76	34.24	173.96	36.81
-33.51	1.59	27.26	CMF	Spring Exp.Group (Field-captured)	43.23	33.55	177.28	39.1
-33.2	1.94	27.67	CMF	Spring Exp.Group (Field-captured)	43.26	33.26	176.66	39.76
-33.38	2.69	27.44	CMF	Spring Exp.Group (Field-captured)	43.29	33.49	175.39	39.33
-31.97	2.88	24.7	CMF	Contral Group(Lab-raised)	40.5	32.1	174.85	37.58
-30.23	1.97	25.52	CMF	Contral Group(Lab-raised)	39.61	30.29	176.27	40.11
-33.73	4.2	25.48	CMF	Contral Group(Lab-raised)	42.48	33.99	172.9	36.86
-31.97	2.87	24.49	CMF	Contral Group(Lab-raised)	40.37	32.1	174.87	37.34
-29.13	3.16	26.97	CMF	Exp. Group(Lab-raised)	39.82	29.3	173.81	42.63
-31.9	2.63	25.16	CMF	Exp. Group(Lab-raised)	40.71	32.01	175.29	38.17
-33.73	1.97	24.21	CMF	Exp. Group(Lab-raised)	41.57	33.79	176.66	35.62
-30.56	1.4	24.05	CMF	Exp. Group(Lab-raised)	38.91	30.59	177.38	38.17
-37.87	4.05	27.72	CMF	Fall Exp.Group (Field-captured)	47.11	38.09	173.9	36.05
-33.41	1.03	27.46	CMF	Fall Exp.Group (Field-captured)	43.26	33.43	178.23	39.4
-33.21	2.64	27.88	CMF	Fall Exp.Group (Field-captured)	43.44	33.31	175.45	39.92
-34.49	2.21	25.75	CMF	Fall Exp.Group (Field-captured)	43.1	34.56	176.33	36.69
-34.02	2.8	26.23	CMF	Fall Exp.Group (Field-captured)	43.05	34.14	175.29	37.54
-34.49	2.05	25.96	CMF	Fall Exp.Group (Field-captured)	43.22	34.55	176.6	36.92
34.51	2.06	25.95	NMF	Spring Exp.Group (Field-captured)	43.23	34.57	3.42	36.89
34.04	3.64	25.68	NMF	Spring Exp.Group (Field-captured)	42.8	34.23	6.1	36.87
33.45	1.57	27.26	NMF	Spring Exp.Group (Field-captured)	43.18	33.49	2.69	39.15
33.18	2.01	27.67	NMF	Spring Exp.Group (Field-captured)	43.25	33.24	3.47	39.77
30.68	2.03	24.53	NMF	Contral Group(Lab-raised)	39.33	30.75	3.79	38.58
31.97	2.87	24.49	NMF	Contral Group(Lab-raised)	40.37	32.1	5.13	37.34
30.77	2.11	25.61	NMF	Contral Group(Lab-raised)	40.09	30.84	3.92	39.7
34.74	2.11	28.03	NMF	Contral Group(Lab-raised)	44.69	34.8	3.48	38.85
30.21	2.17	25.24	NMF	Exp. Group(Lab-raised)	39.43	30.29	4.11	39.81
30.2	2.17	25.23	NMF	Exp. Group(Lab-raised)	39.41	30.28	4.11	39.8
31.47	1.76	25.6	NMF	Exp. Group(Lab-raised)	40.61	31.52	3.2	39.08
32.45	1.15	24.61	NMF	Exp. Group(Lab-raised)	40.74	32.47	2.03	37.16
32.93	4.61	22.06	NMF	Fall Exp.Group (Field-captured)	39.9	33.25	7.97	33.56
36.37	2.77	28.88	NMF	Fall Exp.Group (Field-captured)	46.52	36.48	4.36	38.37
33.41	1.05	27.58	NMF	Fall Exp.Group (Field-captured)	43.34	33.43	1.8	39.53
33.21	2.28	27.88	NMF	Fall Exp.Group (Field-captured)	43.42	33.29	3.93	39.95
34.47	2.21	25.76	NMF	Fall Exp.Group (Field-captured)	43.09	34.54	3.67	36.72
33.69	4.06	26.4	NMF	Fall Exp.Group (Field-captured)	42.99	33.93	6.87	37.88

## Sheet: Figure_2-figure_supplement_1_E
Timestamp	2000	7000	12000	17000	22000	27000	32000	37000	42000	47000	52000	57000	62000	67000	72000	77000	82000	87000	92000	97000	102000	107000	112000	117000	122000	127000	132000	137000	142000	147000	152000	157000	162000	167000	172000	177000	182000	187000	192000	197000	202000	207000	212000	217000	222000	227000	232000	237000	242000
2024-05-29T17:45:20.972	4.57737e-09	1.01484e-09	8.98484e-10	2.47599e-10	2.19033e-10	1.40729e-10	8.045e-11	1.12792e-10	1.25646e-10	1.01742e-10	7.0813e-11	9.3408e-11	1.09205e-10	6.129e-11	5.2666e-11	9.0093e-11	8.5997e-11	6.0264e-11	4.8684e-11	2.68948e-10	5.9261e-11	7.7511e-11	4.0678e-11	7.0773e-11	1.08551e-10	1.3633e-10	1.11983e-10	9.4387e-11	3.9702e-10	4.6332e-11	9.4981e-11	5.6147e-11	5.0532e-11	4.4155e-11	4.4603e-11	3.1839e-11	5.2454e-11	6.7423e-11	3.2643e-11	3.2883e-11	5.7352e-11	2.7214e-11	6.422e-11	7.0226e-11	5.5399e-11	6.2268e-11	6.5638e-11	5.2614e-11	9.7872e-11
2024-05-29T17:45:24.431	4.72074e-09	9.8546e-10	5.66973e-10	2.4423e-10	1.13708e-10	1.23428e-10	1.6436e-10	1.12792e-10	1.2153e-10	8.5567e-11	4.79756e-10	6.6987e-11	1.13664e-10	8.6678e-11	8.2511e-11	6.9421e-11	8.2979e-11	8.5226e-11	7.2574e-11	9.3851e-11	1.05242e-10	6.6102e-11	6.8472e-11	5.2751e-11	7.8563e-11	1.49342e-10	9.0364e-11	5.9696e-11	9.6752e-11	7.0047e-11	6.8309e-11	6.8765e-11	4.3762e-11	5.0986e-11	6.0393e-11	6.6277e-11	5.5636e-11	3.7399e-11	4.6164e-11	7.1036e-11	6.0454e-11	4.7136e-11	6.9814e-11	3.8955e-11	8.3098e-11	7.8763e-11	4.4253e-11	7.7019e-11	3.4603e-11
2024-05-29T17:45:27.889	3.77624e-09	1.04212e-09	6.99168e-10	2.48434e-10	1.54329e-10	1.37438e-10	1.11272e-10	9.6314e-11	1.00925e-10	4.92055e-10	6.3337e-11	1.27294e-10	6.8707e-11	7.4227e-11	7.2768e-11	9.4221e-11	1.10639e-10	7.0205e-11	4.53515e-10	8.6449e-11	1.24089e-10	4.0479e-11	5.2516e-11	9.8688e-11	6.9061e-11	1.34205e-10	9.0364e-11	4.5593e-11	4.5975e-11	7.4296e-11	3.0549e-11	7.1021e-11	7.9898e-11	0	1.8209e-11	7.3528e-11	9.0853e-11	8.9681e-11	4.9862e-11	3.2883e-11	7.8823e-11	3.8486e-11	4.3297e-11	9.9315e-11	5.8759e-11	4.8232e-11	7.1356e-11	6.8888e-11	5.2857e-11
2024-05-29T17:45:31.348	4.43847e-09	1.17355e-09	4.5459e-10	2.68468e-10	1.48716e-10	1.20934e-10	9.0336e-11	1.34249e-10	4.43955e-10	6.926e-11	1.1743e-10	1.2531e-10	1.26099e-10	5.9212e-11	6.737e-11	5.517e-11	9.9728e-11	2.44261e-10	6.4912e-11	9.0963e-11	1.13872e-10	6.8136e-11	4.3938e-11	5.5326e-11	9.7667e-11	1.13433e-10	1.56515e-10	9.4387e-11	7.5745e-11	4.9531e-11	7.2721e-11	5.0219e-11	6.6847e-11	8.455e-11	1.03007e-10	4.5026e-11	5.5636e-11	4.9475e-11	5.9597e-11	7.1036e-11	6.3405e-11	2.7214e-11	3.3538e-11	9.1357e-11	5.5399e-11	5.9072e-11	6.8557e-11	4.8711e-11	3.9956e-11
2024-05-29T17:45:34.807	3.34713e-09	9.63528e-10	4.28592e-10	2.37349e-10	1.63951e-10	1.03267e-10	1.27754e-10	9.2094e-11	6.3831e-11	9.6652e-11	6.1326e-11	1.01098e-10	9.3252e-11	1.16291e-10	5.5007e-11	9.2866e-11	8.7468e-11	8.8217e-11	9.3223e-11	8.9484e-11	5.6936e-11	5.4809e-11	4.9821e-11	7.2713e-11	8.5407e-11	1.32066e-10	8.5386e-11	8.9543e-11	8.3338e-11	6.0662e-11	4.9886e-11	7.3207e-11	7.9898e-11	4.4155e-11	4.12028e-10	4.1103e-11	9.2726e-11	4.5805e-11	5.3305e-11	3.2883e-11	6.3405e-11	1.9243e-11	1.00613e-10	3.77679e-10	5.5399e-11	2.7847e-11	4.8477e-11	5.9659e-11	4.8936e-11
2024-05-29T17:45:38.266	4.54786e-09	1.11338e-09	3.50231e-10	3.67474e-10	1.90806e-10	1.50156e-10	7.312e-11	1.00357e-10	4.8899e-10	9.4003e-11	1.36212e-10	8.0508e-11	7.5594e-11	8.0693e-11	5.2666e-11	1.05643e-10	5.7578e-11	6.6407e-11	5.3822e-11	4.6209e-11	6.7768e-11	7.3904e-11	2.3486e-11	1.01469e-10	9.4751e-11	1.14687e-10	1.06647e-10	6.8931e-11	7.7713e-11	6.5523e-11	4.9886e-11	5.0219e-11	7.5798e-11	3.6052e-11	3.93505e-10	4.1103e-11	4.5426e-11	6.202e-11	3.7692e-11	3.2883e-11	6.0454e-11	7.9342e-11	3.3538e-11	6.7471e-11	0	3.9382e-11	1.9791e-11	3.9773e-11	8.2371e-11
2024-05-29T17:45:41.724	3.50051e-09	7.63159e-10	5.00158e-10	3.94649e-10	1.89912e-10	1.06177e-10	1.2327e-10	1.06756e-10	1.07047e-10	7.7842e-11	1.16358e-10	7.7349e-11	9.8436e-11	6.5249e-11	7.1014e-11	8.2756e-11	4.58962e-10	4.8318e-11	9.18e-11	9.0963e-11	1.13872e-10	6.1833e-11	6.6428e-11	1.17955e-10	6.0392e-11	4.88626e-10	1.21956e-10	6.4479e-11	9.5178e-11	7.0047e-11	3.9439e-11	8.6983e-11	4.7268e-11	6.2444e-11	7.5079e-11	4.5026e-11	5.8645e-11	3.7399e-11	4.2141e-11	5.023e-11	6.0454e-11	5.4428e-11	6.9814e-11	6.7471e-11	4.3797e-11	0	1.9791e-11	2.8123e-11	4.4672e-11
2024-05-29T17:45:45.185	4.23669e-09	1.09646e-09	4.14253e-10	2.62224e-10	1.95213e-10	1.01781e-10	9.7814e-11	1.4099e-10	1.23606e-10	8.4079e-11	9.2329e-11	1.20244e-10	8.4883e-11	7.7527e-11	8.2511e-11	1.06837e-10	4.97355e-10	8.369e-11	9.3223e-11	5.8905e-11	6.9732e-11	5.4809e-11	6.4318e-11	1.00088e-10	7.3011e-11	1.15926e-10	8.8736e-11	5.7154e-11	4.915e-11	4.9531e-11	4.9886e-11	8.1365e-11	6.9193e-11	5.4078e-11	3.1539e-11	9.899e-11	5.5636e-11	1.87e-11	5.9597e-11	6.2967e-11	4.6828e-11	2.7214e-11	4.3297e-11	2.7545e-11	9.5954e-11	4.403e-11	7.6648e-11	7.4408e-11	6.3176e-11
2024-05-29T17:45:48.641	3.61589e-09	1.2237e-09	4.88546e-10	2.17305e-10	2.51569e-10	1.34076e-10	1.13773e-10	5.35019e-10	1.05851e-10	1.08932e-10	1.05033e-10	8.5026e-11	9.191e-11	7.252e-11	1.04127e-10	1.33249e-10	6.7752e-11	8.369e-11	9.0354e-11	7.8351e-11	8.8511e-11	5.2258e-11	6.2137e-11	7.0773e-11	7.1063e-11	1.37374e-10	1.15823e-10	9.1187e-11	6.9508e-11	5.808e-11	5.2912e-11	4.3491e-11	5.3597e-11	2.58095e-10	5.7583e-11	4.8634e-11	4.1468e-11	6.4778e-11	3.7692e-11	3.797e-11	6.8929e-11	2.7214e-11	3.72957e-10	5.1532e-11	3.3925e-11	2.7847e-11	3.9581e-11	2.8123e-11	6.9206e-11
2024-05-29T17:45:52.100	3.586e-09	8.31031e-10	3.94836e-10	2.27548e-10	1.09127e-10	1.2827e-10	1.55565e-10	9.3522e-11	1.33511e-10	1.02975e-10	8.6728e-11	7.8944e-11	8.4883e-11	8.8111e-11	4.7638e-11	8.5766e-11	8.8913e-11	8.369e-11	5.6216e-11	8.1687e-11	6.5744e-11	5.4809e-11	6.2137e-11	6.4606e-11	3.10662e-10	1.43483e-10	1.41854e-10	4.5593e-11	1.13949e-10	5.5377e-11	6.5993e-11	8.1365e-11	7.1463e-11	4.09872e-10	4.0717e-11	6.0966e-11	3.709e-11	2.6445e-11	5.6539e-11	6.8452e-11	6.0454e-11	7.9342e-11	5.4767e-11	7.5435e-11	6.7849e-11	5.2097e-11	3.9581e-11	3.9773e-11	7.4751e-11
2024-05-29T17:45:55.560	4.33099e-09	1.34239e-09	4.63801e-10	2.45076e-10	2.23645e-10	1.14462e-10	1.342e-10	1.05507e-10	8.7404e-11	1.0659e-10	1.05033e-10	8.3547e-11	7.8812e-11	6.5249e-11	8.5512e-11	4.83331e-10	1.1292e-10	9.6637e-11	5.1318e-11	9.9377e-11	6.1498e-11	6.8136e-11	4.6971e-11	7.8243e-11	3.82687e-10	8.7865e-11	1.19541e-10	7.3112e-11	9.3578e-11	7.6332e-11	7.2721e-11	9.7249e-11	6.4416e-11	1.8026e-11	1.8209e-11	1.8382e-11	4.1468e-11	7.9336e-11	5.6539e-11	4.2452e-11	3.8235e-11	4.3029e-11	6.9814e-11	7.2877e-11	4.7977e-11	3.4105e-11	4.8477e-11	7.4408e-11	4.8936e-11
2024-05-29T17:45:59.017	3.61774e-09	8.6103e-10	5.86358e-10	3.1856e-10	1.59746e-10	1.77152e-10	1.31014e-10	1.0921e-10	1.32554e-10	1.05399e-10	8.3787e-11	9.3408e-11	1.10337e-10	7.7527e-11	4.21325e-10	1.05643e-10	8.2979e-11	9.111e-11	8.114e-11	9.8024e-11	7.1643e-11	8.2627e-11	4.6971e-11	3.88358e-10	9.4751e-11	1.92056e-10	9.1964e-11	6.4479e-11	4.915e-11	4.2895e-11	4.9886e-11	6.6434e-11	4.05044e-10	3.6052e-11	7.0524e-11	3.6764e-11	6.6866e-11	3.7399e-11	3.2643e-11	1.07397e-10	2.7036e-11	4.7136e-11	6.9814e-11	7.2877e-11	3.3925e-11	6.2268e-11	3.9581e-11	6.5955e-11	3.4603e-11
2024-05-29T17:46:02.475	4.28567e-09	1.15513e-09	6.07116e-10	2.96337e-10	2.23645e-10	1.19668e-10	1.1622e-10	1.23985e-10	1.2153e-10	1.08932e-10	7.427e-11	6.115e-11	1.251e-10	6.3301e-11	7.6154e-11	8.5766e-11	1.03493e-10	1.00583e-10	4.59e-11	1.02027e-10	8.3808e-11	5.7246e-11	7.6102e-11	6.4606e-11	5.5553e-11	1.3633e-10	8.3661e-11	5.1698e-11	8.6885e-11	5.2535e-11	4.3203e-11	4.6976e-11	4.40889e-10	5.4078e-11	5.4628e-11	3.6764e-11	5.2454e-11	8.9681e-11	4.2141e-11	3.2883e-11	4.6828e-11	4.3029e-11	7.7452e-11	7.0226e-11	7.3286e-11	6.2268e-11	6.5638e-11	3.4444e-11	2.8253e-11
2024-05-29T17:46:05.934	3.62887e-09	1.02597e-09	4.21484e-10	2.0555e-10	1.74993e-10	7.999e-11	1.41348e-10	1.71522e-10	1.2964e-10	1.43885e-10	5.4852e-11	8.0508e-11	1.00929e-10	7.5895e-11	4.63772e-10	1.04436e-10	1.54002e-10	5.5793e-11	5.6216e-11	6.1129e-11	9.5838e-11	9.4932e-11	9.8248e-11	4.32753e-10	8.8631e-11	1.52186e-10	1.21956e-10	7.3112e-11	4.2565e-11	7.8315e-11	7.8877e-11	3.9702e-11	4.2579e-10	5.9786e-11	3.1539e-11	6.0966e-11	8.4985e-11	4.1814e-11	7.299e-11	7.5941e-11	8.5496e-11	7.2001e-11	7.4992e-11	6.4599e-11	3.9173e-11	3.9382e-11	6.8557e-11	7.4408e-11	3.9956e-11
2024-05-29T17:46:09.392	3.36519e-09	1.09646e-09	7.30858e-10	2.57441e-10	1.98668e-10	3.92648e-10	1.08714e-10	1.0921e-10	7.9788e-11	7.2814e-11	1.03833e-10	7.7349e-11	9.5879e-11	9.4951e-11	6.15e-11	9.5558e-11	1.07125e-10	9.797e-11	6.4912e-11	1.0837e-10	9.4418e-11	8.0958e-11	2.8716e-10	1.01469e-10	8.7034e-11	1.21937e-10	1.20754e-10	1.10343e-10	9.83e-11	4.9531e-11	5.5775e-11	4.145e-10	5.9254e-11	6.2444e-11	3.1539e-11	4.1103e-11	5.2454e-11	5.9134e-11	2.6653e-11	7.3529e-11	5.058e-11	6.3822e-11	4.7429e-11	7.0226e-11	4.7977e-11	8.806e-11	5.2361e-11	7.4408e-11	5.9934e-11
2024-05-29T17:46:12.851	3.28213e-09	1.15225e-09	6.12566e-10	2.51746e-10	1.54329e-10	4.73551e-10	1.5004e-10	1.02964e-10	8.7404e-11	1.04194e-10	1.09703e-10	6.5099e-11	9.8436e-11	8.0693e-11	8.6974e-11	1.10341e-10	9.4476e-11	9.2523e-11	1.08861e-10	7.6629e-11	9.9977e-11	5.4809e-11	5.2516e-11	7.2713e-11	9.3259e-11	1.42483e-10	1.25492e-10	9.1187e-11	6.0196e-11	7.4296e-11	4.9886e-11	4.25756e-10	6.4416e-11	7.4324e-11	5.1504e-11	1.8382e-11	4.9066e-11	6.4778e-11	4.9862e-11	4.6504e-11	3.393e-10	8.3879e-11	5.4767e-11	6.4599e-11	5.1821e-11	6.8211e-11	3.4278e-11	8.6682e-11	3.4603e-11
2024-05-29T17:46:16.315	3.31073e-09	1.17809e-09	4.77917e-10	2.94936e-10	1.88112e-10	1.10397e-10	1.3628e-10	6.9071e-11	1.41835e-10	1.30061e-10	9.6316e-11	6.5099e-11	8.1904e-11	6.5249e-11	8.4025e-11	1.18113e-10	9.5816e-11	5.5793e-11	9.8711e-11	8.798e-11	1.25173e-10	6.4002e-11	4.34962e-10	8.0001e-11	1.39134e-10	1.46441e-10	1.20754e-10	5.7154e-11	8.513e-11	4.2895e-11	7.055e-11	4.00183e-10	5.0532e-11	6.9814e-11	8.1434e-11	3.6764e-11	5.8645e-11	4.1814e-11	6.2506e-11	6.2967e-11	6.8929e-11	7.4528e-11	5.8089e-11	5.509e-11	1.9586e-11	4.403e-11	4.4253e-11	4.4467e-11	3.4603e-11
2024-05-29T17:46:19.773	3.66933e-09	1.28597e-09	3.94836e-10	2.45076e-10	1.48716e-10	1.30624e-10	1.03408e-10	1.06756e-10	8.7404e-11	1.15677e-10	8.9572e-11	8.6479e-11	4.93179e-10	4.7476e-11	9.2591e-11	9.4221e-11	5.9752e-11	7.2029e-11	7.2574e-11	9.2418e-11	7.1643e-11	4.2067e-10	5.2516e-11	1.43499e-10	9.9093e-11	1.10884e-10	9.8101e-11	8.0828e-11	6.7301e-11	7.0047e-11	4.2072e-10	3.551e-11	9.621e-11	3.1222e-11	5.1504e-11	5.1992e-11	7.4181e-11	6.7423e-11	9.0383e-11	5.3698e-11	8.1108e-11	1.9243e-11	2.7383e-11	6.7471e-11	6.4961e-11	3.4105e-11	5.2361e-11	2.8123e-11	2.8253e-11
2024-05-29T17:46:23.227	4.1807e-09	9.94903e-10	4.31402e-10	5.86703e-10	2.09505e-10	1.38536e-10	1.02038e-10	9.3522e-11	7.653e-11	3.1779e-11	6.3337e-11	6.115e-11	1.44465e-10	1.24603e-10	7.448e-11	8.4274e-11	7.3181e-11	5.0932e-11	6.691e-11	9.2418e-11	4.48014e-10	4.9576e-11	6.8472e-11	1.01469e-10	6.0392e-11	1.19569e-10	9.0364e-11	9.2801e-11	1.11268e-10	4.22827e-10	6.8309e-11	7.5329e-11	1.7866e-11	2.5493e-11	5.4628e-11	6.3677e-11	5.8645e-11	7.4799e-11	8.4283e-11	7.5941e-11	2.7036e-11	2.7214e-11	2.7383e-11	4.3553e-11	6.1938e-11	6.5307e-11	5.2361e-11	5.2614e-11	5.2857e-11
2024-05-29T17:46:26.686	3.83462e-09	1.11038e-09	5.49657e-10	2.76075e-10	1.12202e-10	1.23428e-10	1.20966e-10	9.0644e-11	1.1396e-10	1.00494e-10	4.63272e-10	8.7909e-11	9.7166e-11	5.2486e-11	6.5472e-11	7.4701e-11	7.3181e-11	8.5226e-11	1.0517e-10	4.60356e-10	9.4418e-11	8.7445e-11	2.8764e-11	1.01469e-10	8.2057e-11	1.18367e-10	9.3536e-11	7.5115e-11	8.1506e-11	7.8315e-11	4.6664e-11	7.3207e-11	3.9949e-11	4.4155e-11	9.2849e-11	4.5026e-11	4.5426e-11	1.87e-11	6.7951e-11	4.2452e-11	3.8235e-11	5.0913e-11	7.7452e-11	2.7545e-11	5.5399e-11	3.9382e-11	5.2361e-11	7.7019e-11	4.4672e-11
2024-05-29T17:46:30.144	3.88521e-09	1.03827e-09	4.55254e-10	3.20499e-10	1.7106e-10	1.4394e-10	1.45275e-10	1.26104e-10	8.7404e-11	8.4079e-11	4.64893e-10	1.31152e-10	1.08062e-10	7.4227e-11	1.00429e-10	9.149e-11	8.2979e-11	6.6407e-11	7.4366e-11	8.3305e-11	7.1643e-11	2.8623e-11	6.6428e-11	7.6444e-11	8.7034e-11	1.23104e-10	1.40823e-10	7.3112e-11	7.9632e-11	5.2535e-11	4.6664e-11	6.1506e-11	6.9193e-11	5.9786e-11	5.4628e-11	8.2207e-11	7.1825e-11	3.2389e-11	2.6653e-11	8.4905e-11	3.8235e-11	4.3029e-11	3.8726e-11	7.2877e-11	3.9173e-11	2.7847e-11	4.8477e-11	5.6247e-11	1.9978e-11
2024-05-29T17:46:33.607	4.18392e-09	1.10918e-09	4.222e-10	2.64582e-10	2.08692e-10	1.10397e-10	1.37309e-10	9.4929e-11	1.03417e-10	4.4942e-11	4.84695e-10	1.2531e-10	1.59971e-10	6.7141e-11	5.5007e-11	8.4274e-11	9.3116e-11	2.7897e-11	7.0736e-11	6.9314e-11	1.10256e-10	4.9576e-11	7.9644e-11	6.6726e-11	8.3749e-11	1.38411e-10	1.15823e-10	7.1052e-11	8.3338e-11	8.3983e-11	4.9886e-11	5.0219e-11	3.5731e-11	6.2444e-11	5.1504e-11	9.373e-11	4.9066e-11	4.1814e-11	4.9862e-11	6.5767e-11	7.8823e-11	1.9243e-11	5.4767e-11	4.3553e-11	6.7849e-11	1.9691e-11	5.2361e-11	7.7019e-11	7.2032e-11
2024-05-29T17:46:37.061	3.97938e-09	1.11698e-09	4.4722e-10	1.80897e-10	1.54329e-10	1.20934e-10	1.46241e-10	1.22912e-10	4.29376e-10	3.8921e-11	1.03833e-10	8.3547e-11	9.191e-11	4.187e-11	6.737e-11	8.5766e-11	9.0336e-11	4.47507e-10	5.6216e-11	1.31716e-10	7.5319e-11	6.1833e-11	5.5079e-11	7.4601e-11	6.6999e-11	1.10884e-10	1.42878e-10	8.9543e-11	6.7301e-11	5.808e-11	6.1098e-11	7.1021e-11	3.0944e-11	6.7448e-11	1.8209e-11	3.6764e-11	9.0853e-11	4.5805e-11	7.299e-11	3.797e-11	6.3405e-11	7.9342e-11	3.8726e-11	4.7709e-11	7.062e-11	2.7847e-11	1.9791e-11	2.8123e-11	4.8936e-11
2024-05-29T17:46:40.519	3.48896e-09	1.01747e-09	5.45242e-10	2.98426e-10	2.19033e-10	1.59026e-10	9.6365e-11	1.33258e-10	1.16173e-10	6.5514e-11	7.9172e-11	8.0508e-11	8.3407e-11	6.3301e-11	7.7792e-11	8.2756e-11	9.5816e-11	5.5793e-11	9.6006e-11	6.1129e-11	8.6971e-11	5.2258e-11	5.9877e-11	6.2416e-11	8.3749e-11	1.38411e-10	1.13278e-10	4.5593e-11	5.7633e-11	6.3139e-11	6.3593e-11	5.8887e-11	7.1463e-11	5.4078e-11	4.27045e-10	6.0966e-11	8.0837e-11	5.2891e-11	6.7951e-11	3.797e-11	7.4041e-11	5.0913e-11	6.422e-11	3.35666e-10	5.1821e-11	6.5307e-11	3.4278e-11	1.07091e-10	4.4672e-11
2024-05-29T17:46:43.981	4.11414e-09	7.64907e-10	4.82948e-10	1.5633e-10	2.03742e-10	1.15786e-10	1.48152e-10	1.23985e-10	4.87687e-10	9.9229e-11	9.8885e-11	1.03535e-10	9.0548e-11	5.9212e-11	8.9827e-11	1.19182e-10	9.8441e-11	6.6407e-11	8.114e-11	8.4892e-11	1.15052e-10	5.2258e-11	1.0371e-10	9.4364e-11	9.622e-11	1.59525e-10	8.5386e-11	5.9696e-11	8.513e-11	6.0662e-11	3.5275e-11	6.8765e-11	7.5798e-11	6.4994e-11	2.3248e-10	4.5026e-11	7.1825e-11	7.2423e-11	6.5285e-11	1.8985e-11	6.8929e-11	4.7136e-11	3.8726e-11	8.2635e-11	5.8759e-11	3.9382e-11	3.4278e-11	0	3.4603e-11
2024-05-29T17:46:47.437	3.75837e-09	1.22534e-09	6.17967e-10	2.24801e-10	1.33015e-10	1.4394e-10	1.18617e-10	9.0644e-11	4.93395e-10	4.4942e-11	1.19546e-10	7.5721e-11	7.3932e-11	8.9521e-11	4.7638e-11	7.8023e-11	5.7578e-11	4.38725e-10	3.975e-11	6.7361e-11	5.9261e-11	1.37271e-10	4.0678e-11	1.11902e-10	8.3749e-11	1.2426e-10	8.3661e-11	1.04822e-10	7.3725e-11	8.2137e-11	3.5275e-11	6.8765e-11	7.9898e-11	4.4155e-11	5.7583e-11	6.6277e-11	5.5636e-11	4.5805e-11	5.6539e-11	6.2967e-11	5.7352e-11	5.0913e-11	2.7383e-11	6.4599e-11	3.9173e-11	6.2268e-11	2.7988e-11	7.4408e-11	6.9206e-11
2024-05-29T17:46:50.896	4.30917e-09	9.04165e-10	5.46902e-10	2.86385e-10	1.30432e-10	1.03267e-10	1.44304e-10	1.00357e-10	4.63596e-10	9.1278e-11	1.36212e-10	6.6987e-11	1.17955e-10	4.476e-11	5.9415e-11	9.149e-11	9.3116e-11	4.10311e-10	5.8511e-11	1.00711e-10	9.9977e-11	4.6741e-11	7.4268e-11	6.4606e-11	6.2672e-11	1.32066e-10	1.10673e-10	5.1698e-11	8.1506e-11	8.2137e-11	8.0825e-11	2.511e-11	3.5731e-11	4.0308e-11	4.0717e-11	3.1839e-11	6.1508e-11	5.9134e-11	4.9862e-11	4.2452e-11	6.0454e-11	6.9382e-11	6.7075e-11	5.1532e-11	4.3797e-11	3.9382e-11	2.7988e-11	7.4408e-11	8.9344e-11
2024-05-29T17:46:54.371	4.57443e-09	8.89268e-10	7.71849e-10	2.36475e-10	1.93462e-10	1.23428e-10	1.51904e-10	1.00357e-10	4.38182e-10	7.106e-11	1.19546e-10	7.4056e-11	5.4603e-11	6.898e-11	7.7792e-11	8.2756e-11	4.5168e-11	4.39316e-10	7.2574e-11	9.9377e-11	1.24089e-10	7.7511e-11	9.3943e-11	5.0044e-11	8.8631e-11	1.42483e-10	8.19e-11	5.1698e-11	6.9508e-11	5.2535e-11	4.3203e-11	7.7393e-11	7.9898e-11	3.6052e-11	5.4628e-11	6.8779e-11	6.939e-11	4.5805e-11	6.7951e-11	8.2755e-11	4.2748e-11	5.7729e-11	7.245e-11	5.509e-11	6.1938e-11	8.583e-11	2.7988e-11	6.8888e-11	7.7374e-11
2024-05-29T17:46:57.811	3.99457e-09	8.61805e-10	4.20047e-10	3.81847e-10	2.19033e-10	1.67426e-10	1.06094e-10	1.28185e-10	5.9708e-11	6.1539e-11	7.5939e-11	7.2354e-11	1.12566e-10	6.5249e-11	5.2666e-11	1.08017e-10	9.9728e-11	6.4424e-11	8.2747e-11	8.6449e-11	9.5838e-11	9.0514e-11	3.3214e-11	8.0001e-11	6.2672e-11	1.35277e-10	7.8258e-11	7.897e-11	8.513e-11	7.8315e-11	6.1098e-11	5.3266e-11	8.1871e-11	8.0615e-11	3.76275e-10	3.6764e-11	6.6866e-11	4.5805e-11	7.9958e-11	7.5941e-11	6.0454e-11	3.8486e-11	3.8726e-11	3.41825e-10	3.9173e-11	5.5694e-11	5.2361e-11	5.2614e-11	3.9956e-11
2024-05-29T17:47:01.272	3.60471e-09	9.23171e-10	6.50363e-10	1.58955e-10	2.36942e-10	1.18388e-10	1.33136e-10	1.13961e-10	5.29014e-10	8.2564e-11	1.51878e-10	1.10522e-10	8.6334e-11	8.6678e-11	9.2591e-11	8.5766e-11	9.0336e-11	6.0264e-11	7.0736e-11	7.4867e-11	8.052e-11	4.6741e-11	5.7528e-11	6.0146e-11	7.4907e-11	1.32066e-10	1.14558e-10	7.897e-11	6.0196e-11	6.3139e-11	3.0549e-11	8.1365e-11	5.6496e-11	5.0986e-11	3.76275e-10	1.8382e-11	7.8681e-11	5.6099e-11	7.0516e-11	6.5767e-11	6.0454e-11	2.7214e-11	6.422e-11	1.7421e-10	1.9586e-11	4.403e-11	5.9372e-11	7.1701e-11	5.9934e-11
2024-05-29T17:47:04.733	4.52857e-09	9.46745e-10	3.73605e-10	2.4423e-10	2.30389e-10	8.5513e-11	1.2327e-10	1.11611e-10	1.98029e-10	9.4003e-11	8.8162e-11	9.4733e-11	1.21073e-10	7.9126e-11	6.15e-11	9.2866e-11	4.49983e-10	7.3808e-11	7.2574e-11	9.8024e-11	6.7768e-11	7.7511e-11	5.5079e-11	8.3407e-11	5.5553e-11	4.4192e-10	1.2893e-10	1.08989e-10	6.0196e-11	8.0249e-11	4.9886e-11	6.1506e-11	4.3762e-11	5.4078e-11	5.4628e-11	6.0966e-11	4.9066e-11	2.6445e-11	5.6539e-11	7.5941e-11	5.7352e-11	4.7136e-11	4.3297e-11	3.8955e-11	3.3925e-11	4.403e-11	5.5976e-11	7.9545e-11	7.2032e-11
2024-05-29T17:47:08.193	4.58765e-09	1.2724e-09	3.11903e-10	2.06555e-10	2.28908e-10	1.30624e-10	1.52827e-10	1.38141e-10	9.9655e-11	9.9229e-11	7.5939e-11	7.2354e-11	1.03361e-10	6.898e-11	7.6154e-11	4.73791e-10	8.1428e-11	1.0438e-10	9.4625e-11	1.05879e-10	1.26247e-10	8.7445e-11	7.4268e-11	8.1722e-11	4.05815e-10	1.15926e-10	1.11983e-10	5.7154e-11	7.7713e-11	4.6332e-11	7.2721e-11	8.1365e-11	4.7268e-11	4.0308e-11	7.7255e-11	6.0966e-11	6.1508e-11	8.3628e-11	7.299e-11	6.5767e-11	5.7352e-11	6.9382e-11	6.1231e-11	5.509e-11	5.1821e-11	2.7847e-11	2.7988e-11	6.5955e-11	6.9206e-11
2024-05-29T17:47:11.646	5.20505e-09	9.25339e-10	3.21444e-10	1.70281e-10	1.44064e-10	1.2827e-10	1.29937e-10	1.41927e-10	1.23606e-10	8.102e-11	3.8786e-11	1.07086e-10	7.722e-11	8.0693e-11	3.68659e-10	9.5558e-11	1.16258e-10	3.9452e-11	4.8684e-11	8.798e-11	9.7237e-11	5.9583e-11	4.6971e-11	4.45115e-10	1.01885e-10	1.67397e-10	9.8101e-11	7.5115e-11	7.9632e-11	8.0249e-11	4.3203e-11	6.6434e-11	4.32114e-10	5.9786e-11	4.8177e-11	5.1992e-11	6.1508e-11	9.3499e-11	4.2141e-11	2.6849e-11	4.2748e-11	7.9342e-11	3.8726e-11	5.1532e-11	0	5.2097e-11	3.4278e-11	1.10722e-10	3.9956e-11
2024-05-29T17:47:15.109	4.35115e-09	9.15178e-10	3.94836e-10	2.34716e-10	1.58678e-10	8.1873e-11	1.26648e-10	1.33258e-10	9.4407e-11	7.2814e-11	9.8885e-11	8.0508e-11	8.1904e-11	7.7527e-11	1.01677e-10	8.2756e-11	7.6586e-11	5.8071e-11	8.5871e-11	1.2549e-10	1.03951e-10	1.0187e-10	4.3938e-11	3.12971e-10	1.00499e-10	1.19569e-10	1.19541e-10	7.3112e-11	5.2131e-11	7.2203e-11	4.9886e-11	6.1506e-11	4.05831e-10	5.0986e-11	4.4603e-11	5.1992e-11	6.1508e-11	5.9134e-11	4.9862e-11	7.3529e-11	5.058e-11	4.3029e-11	3.8726e-11	6.7471e-11	6.1938e-11	2.7847e-11	5.9372e-11	6.5955e-11	7.2032e-11
2024-05-29T17:47:18.563	4.38506e-09	1.14063e-09	6.10095e-10	2.3116e-10	1.7884e-10	5.22786e-10	1.31014e-10	1.01669e-10	1.16173e-10	6.7413e-11	9.3677e-11	9.2064e-11	6.1047e-11	5.2486e-11	6.9216e-11	6.3705e-11	1.25738e-10	4.8318e-11	6.691e-11	6.7361e-11	9.0024e-11	2.3371e-11	3.7134e-11	6.6726e-11	5.5553e-11	1.21937e-10	8.5386e-11	6.2133e-11	6.9508e-11	5.5377e-11	3.9439e-11	3.88593e-10	6.9193e-11	1.01971e-10	5.4628e-11	6.6277e-11	6.1508e-11	1.87e-11	3.7692e-11	5.3698e-11	7.8823e-11	4.3029e-11	4.3297e-11	6.1593e-11	2.7699e-11	1.9691e-11	2.7988e-11	3.4444e-11	4.4672e-11
2024-05-29T17:47:22.021	5.13342e-09	1.01484e-09	5.15624e-10	2.61432e-10	1.30432e-10	1.62812e-10	1.6436e-10	1.80555e-10	8.5935e-11	5.729e-11	4.4786e-11	7.4056e-11	3.05238e-10	9.3623e-11	7.6154e-11	9.6876e-11	1.18432e-10	4.5555e-11	7.2574e-11	1.00711e-10	8.218e-11	4.42809e-10	7.2388e-11	1.06813e-10	7.6757e-11	8.9477e-11	1.0103e-10	7.5115e-11	6.0196e-11	4.2895e-11	4.40231e-10	6.8765e-11	9.1098e-11	7.4324e-11	4.8177e-11	6.6277e-11	5.2454e-11	6.7423e-11	3.7692e-11	6.8452e-11	8.7607e-11	4.3029e-11	0	7.0226e-11	6.7849e-11	6.2268e-11	6.8557e-11	9.5371e-11	8.7082e-11
2024-05-29T17:47:25.480	4.32476e-09	9.55872e-10	4.78549e-10	2.94936e-10	1.73038e-10	1.42878e-10	1.3833e-10	1.4099e-10	9.167e-11	9.4003e-11	7.2562e-11	7.061e-11	4.68385e-10	6.7141e-11	1.37518e-10	8.8674e-11	1.14044e-10	8.6734e-11	6.885e-11	5.1663e-11	1.02643e-10	4.33144e-10	6.8472e-11	7.0773e-11	1.17248e-10	1.2654e-10	1.14558e-10	5.7154e-11	5.4951e-11	6.0662e-11	6.1098e-11	1.17775e-10	9.621e-11	5.9786e-11	6.3079e-11	3.6764e-11	2.6227e-11	7.7101e-11	4.6164e-11	5.6956e-11	2.7036e-11	4.3029e-11	2.7383e-11	7.0226e-11	6.1938e-11	7.0996e-11	5.5976e-11	6.8888e-11	2.8253e-11
2024-05-29T17:47:28.938	4.08622e-09	1.04276e-09	5.62694e-10	5.19686e-10	1.56519e-10	1.23428e-10	1.31014e-10	8.917e-11	1.17264e-10	8.102e-11	7.5939e-11	9.2064e-11	9.7166e-11	6.898e-11	9.1219e-11	9.8176e-11	7.9847e-11	5.0932e-11	5.6216e-11	8.4892e-11	1.45159e-10	5.4809e-11	1.06336e-10	5.7786e-11	8.2057e-11	1.47415e-10	1.08006e-10	6.4479e-11	9.1951e-11	4.35686e-10	6.1098e-11	7.7393e-11	6.9193e-11	7.4324e-11	3.6418e-11	3.6764e-11	2.6227e-11	6.9968e-11	5.9597e-11	9.105e-11	7.647e-11	6.3822e-11	3.3538e-11	5.509e-11	4.7977e-11	7.6262e-11	5.2361e-11	5.2614e-11	3.9956e-11
2024-05-29T17:47:32.397	3.38315e-09	1.26977e-09	5.15624e-10	2.99811e-10	2.05405e-10	1.51168e-10	9.3399e-11	1.13961e-10	6.3831e-11	6.1539e-11	7.9172e-11	9.604e-11	6.305e-11	5.2486e-11	8.6974e-11	8.4274e-11	1.29735e-10	6.6407e-11	6.285e-11	8.1687e-11	1.02643e-10	4.0479e-11	8.9431e-11	1.01469e-10	7.8563e-11	9.8599e-11	1.06647e-10	7.1052e-11	4.24229e-10	8.0249e-11	1.08725e-10	5.6147e-11	3.9949e-11	6.2444e-11	4.0717e-11	5.1992e-11	8.0837e-11	9.895e-11	4.9862e-11	6.2967e-11	7.1531e-11	4.7136e-11	4.3297e-11	4.3553e-11	3.3925e-11	3.4105e-11	3.43925e-10	3.9773e-11	4.4672e-11
2024-05-29T17:47:35.855	4.09445e-09	8.11512e-10	6.05621e-10	2.63012e-10	1.67035e-10	1.38536e-10	1.2327e-10	1.10417e-10	1.15072e-10	8.4079e-11	4.48422e-10	8.0508e-11	1.09205e-10	7.252e-11	1.1883e-10	1.09185e-10	1.08309e-10	6.4424e-11	5.3822e-11	6.9314e-11	9.0024e-11	6.4002e-11	8.3035e-11	9.1368e-11	5.8023e-11	1.20759e-10	1.19541e-10	5.1698e-11	7.1648e-11	7.8315e-11	3.9439e-11	7.5329e-11	7.7875e-11	5.0986e-11	6.3079e-11	4.5026e-11	4.28551e-10	3.7399e-11	6.7951e-11	5.3698e-11	5.4072e-11	4.3029e-11	3.8726e-11	9.341e-11	5.1821e-11	3.64147e-10	4.8477e-11	5.2614e-11	8.7082e-11
2024-05-29T17:47:39.314	4.1321e-09	1.06557e-09	6.62331e-10	2.93528e-10	2.00374e-10	1.59981e-10	1.17425e-10	7.9756e-11	6.9558e-11	9.6652e-11	1.11966e-10	9.3408e-11	9.8436e-11	5.0044e-11	5.9415e-11	6.3705e-11	7.6586e-11	9.3914e-11	9.4625e-11	1.23345e-10	9.7237e-11	7.9253e-11	6.8472e-11	5.7786e-11	1.12361e-10	1.53123e-10	9.3536e-11	4.27703e-10	7.5745e-11	8.7559e-11	4.6664e-11	5.6147e-11	0	7.8574e-11	6.0393e-11	4.1103e-11	1.74955e-10	5.9134e-11	3.2643e-11	6.2967e-11	3.3112e-11	5.0913e-11	5.8089e-11	7.2877e-11	1.9586e-11	3.32419e-10	5.2361e-11	4.4467e-11	7.2032e-11
2024-05-29T17:47:42.773	3.6196e-09	1.34983e-09	5.91488e-10	2.29361e-10	1.33015e-10	1.06177e-10	1.49099e-10	1.12792e-10	9.837e-11	4.84301e-10	6.3337e-11	1.04732e-10	9.5879e-11	7.7527e-11	8.0969e-11	1.25399e-10	8.7468e-11	9.797e-11	4.62713e-10	4.3225e-11	9.5838e-11	6.6102e-11	7.7893e-11	6.2416e-11	7.6757e-11	7.9313e-11	1.18315e-10	7.5115e-11	9.1951e-11	4.9531e-11	0	4.6976e-11	5.6496e-11	4.0308e-11	4.0717e-11	5.1992e-11	5.5636e-11	6.7423e-11	3.7692e-11	7.1036e-11	5.058e-11	4.7136e-11	4.3297e-11	3.8955e-11	7.062e-11	5.2097e-11	5.9372e-11	5.6247e-11	5.2857e-11
2024-05-29T17:47:46.232	3.5935e-09	9.40374e-10	4.64452e-10	2.30262e-10	2.1669e-10	1.93589e-10	5.811e-11	1.26104e-10	7.3127e-11	4.86641e-10	7.0813e-11	9.07e-11	5.2278e-11	5.482e-11	8.4025e-11	9.0093e-11	8.1428e-11	6.4424e-11	1.17022e-10	8.6449e-11	8.3808e-11	3.6952e-11	5.5079e-11	6.2416e-11	3.35e-11	1.38411e-10	1.39783e-10	6.4479e-11	8.6885e-11	7.8315e-11	8.8187e-11	4.6976e-11	3.9949e-11	7.6479e-11	7.9372e-11	3.70387e-10	4.5426e-11	3.7399e-11	2.6653e-11	6.2967e-11	3.8235e-11	3.333e-11	4.3297e-11	2.7545e-11	3.3925e-11	3.4105e-11	3.9581e-11	7.4408e-11	4.8936e-11
2024-05-29T17:47:49.692	3.50628e-09	9.04165e-10	5.91488e-10	3.15297e-10	2.08692e-10	1.37438e-10	1.2885e-10	9.9028e-11	4.76329e-10	4.2039e-11	1.14183e-10	1.02324e-10	1.16897e-10	6.5249e-11	7.2768e-11	1.23364e-10	1.18432e-10	9.2523e-11	8.2747e-11	8.4892e-11	9.5838e-11	4.9576e-11	1.10158e-10	7.4601e-11	8.7034e-11	1.59525e-10	1.09348e-10	7.3112e-11	6.9508e-11	5.808e-11	5.5775e-11	5.8887e-11	7.5798e-11	3.1222e-11	3.05785e-10	8.4237e-11	1.03255e-10	4.5805e-11	3.7692e-11	0	6.8929e-11	5.7729e-11	6.7075e-11	4.3553e-11	6.4961e-11	6.2268e-11	5.5976e-11	5.9659e-11	4.4672e-11
2024-05-29T17:47:53.149	3.35718e-09	9.88167e-10	3.57066e-10	1.8542e-10	2.9971e-10	8.3713e-11	1.25532e-10	1.50095e-10	9.837e-11	5.0247e-11	6.5287e-11	7.7349e-11	6.1047e-11	6.898e-11	8.2511e-11	8.5766e-11	5.04462e-10	7.3808e-11	1.18142e-10	8.9484e-11	7.5319e-11	4.9576e-11	8.9431e-11	6.2416e-11	1.05935e-10	1.41476e-10	9.1964e-11	6.4479e-11	7.3725e-11	4.9531e-11	2.4943e-11	7.9404e-11	1.19847e-10	6.2444e-11	6.3079e-11	8.4237e-11	5.2454e-11	7.4799e-11	5.9597e-11	6.2967e-11	3.8235e-11	3.333e-11	5.4767e-11	7.5435e-11	4.3797e-11	3.9382e-11	6.5638e-11	3.4444e-11	5.9934e-11
2024-05-29T17:47:56.607	3.29033e-09	8.74881e-10	6.68687e-10	2.61432e-10	2.30389e-10	1.73678e-10	7.502e-11	1.33258e-10	1.16173e-10	7.2814e-11	4.1894e-11	5.9077e-11	6.499e-11	5.0044e-11	5.9415e-11	9.2866e-11	4.40533e-10	6.0264e-11	5.8511e-11	1.02027e-10	1.1268e-10	7.3904e-11	5.9877e-11	9.5827e-11	9.622e-11	4.14544e-10	1.38736e-10	3.8533e-11	4.2565e-11	7.6332e-11	6.3593e-11	8.1365e-11	8.9329e-11	7.8574e-11	8.3445e-11	7.7988e-11	5.5636e-11	5.6099e-11	9.2327e-11	4.6504e-11	5.4072e-11	7.2001e-11	0	8.9256e-11	7.5857e-11	5.9072e-11	7.9163e-11	6.2886e-11	4.4672e-11
2024-05-29T17:48:00.072	5.40183e-09	1.0879e-09	6.23806e-10	2.15391e-10	1.59746e-10	1.17094e-10	1.58255e-10	1.23985e-10	1.34461e-10	8.703e-11	1.1743e-10	1.08243e-10	9.5879e-11	6.7141e-11	4.62956e-10	1.00727e-10	1.50654e-10	7.2029e-11	2.8108e-11	1.12004e-10	1.17377e-10	8.0958e-11	6.6428e-11	4.24639e-10	1.09836e-10	1.45462e-10	6.3897e-11	5.4494e-11	4.5975e-11	5.2535e-11	4.9886e-11	3.0753e-11	3.95475e-10	6.2444e-11	5.4628e-11	3.1839e-11	4.1468e-11	6.202e-11	5.9597e-11	8.2755e-11	4.6828e-11	6.0852e-11	6.422e-11	3.8955e-11	4.7977e-11	5.2097e-11	4.8477e-11	3.4444e-11	6.626e-11
2024-05-29T17:48:03.524	3.98783e-09	8.57921e-10	6.22837e-10	2.56635e-10	1.47567e-10	1.38536e-10	1.13773e-10	9.4929e-11	1.44503e-10	9.1278e-11	1.03833e-10	6.5099e-11	9.4574e-11	4.57017e-10	8.4025e-11	9.6876e-11	9.7138e-11	7.0205e-11	7.6116e-11	5.6594e-11	7.5319e-11	3.6952e-11	4.55405e-10	6.6726e-11	1.53514e-10	1.56813e-10	1.31172e-10	8.2645e-11	1.11268e-10	7.0047e-11	5.5775e-11	3.9702e-11	4.3762e-11	4.0308e-11	9.2849e-11	6.8779e-11	7.1825e-11	5.6099e-11	7.299e-11	6.5767e-11	5.058e-11	5.4428e-11	5.4767e-11	6.1593e-11	5.8759e-11	2.7847e-11	2.7988e-11	6.5955e-11	5.2857e-11
2024-05-29T17:48:06.989	3.42468e-09	9.45333e-10	5.88929e-10	2.26636e-10	2.21351e-10	1.06177e-10	1.0476e-10	1.28185e-10	1.17264e-10	1.26108e-10	8.074e-11	1.02324e-10	9.5879e-11	4.85706e-10	6.15e-11	1.34197e-10	7.8233e-11	6.0264e-11	5.6216e-11	7.8351e-11	9.7237e-11	6.6102e-11	3.19872e-10	4.0861e-11	1.12361e-10	1.13433e-10	9.6603e-11	6.2133e-11	4.5975e-11	4.2895e-11	4.9886e-11	7.5329e-11	7.3662e-11	3.6052e-11	4.4603e-11	4.8634e-11	6.6866e-11	5.9134e-11	1.03225e-10	4.2452e-11	8.1108e-11	5.0913e-11	8.8732e-11	7.2877e-11	7.5857e-11	6.8211e-11	5.5976e-11	5.2614e-11	5.9934e-11
2024-05-29T17:48:10.441	3.90939e-09	1.18036e-09	5.12686e-10	2.23877e-10	1.48716e-10	1.58065e-10	1.26648e-10	1.34249e-10	1.03417e-10	1.07767e-10	1.01389e-10	1.03535e-10	1.28054e-10	5.0461e-10	6.15e-11	1.09185e-10	1.21618e-10	3.6014e-11	3.6287e-11	8.3305e-11	8.6971e-11	4.9576e-11	4.26962e-10	5.5326e-11	1.30817e-10	1.01458e-10	1.0103e-10	1.00483e-10	4.2565e-11	4.6332e-11	6.8309e-11	5.8887e-11	3.0944e-11	4.7693e-11	3.6418e-11	0	6.939e-11	5.6099e-11	6.2506e-11	7.8278e-11	2.7036e-11	6.3822e-11	4.3297e-11	6.1593e-11	3.3925e-11	3.4105e-11	3.9581e-11	3.9773e-11	3.4603e-11
2024-05-29T17:48:13.900	3.62702e-09	1.27816e-09	5.35175e-10	2.95637e-10	2.76073e-10	1.63745e-10	1.31014e-10	1.00357e-10	1.16173e-10	1.05399e-10	9.6316e-11	9.07e-11	4.90911e-10	5.7059e-11	9.2591e-11	1.06837e-10	1.00999e-10	3.6014e-11	4.59e-11	9.6653e-11	1.05242e-10	4.26473e-10	8.1357e-11	7.6444e-11	1.07251e-10	1.35277e-10	1.11983e-10	5.9696e-11	7.9632e-11	6.5523e-11	7.688e-11	7.1021e-11	7.7875e-11	7.2105e-11	7.0524e-11	6.0966e-11	5.5636e-11	7.9336e-11	7.9958e-11	8.4905e-11	4.2748e-11	4.7136e-11	6.7075e-11	5.509e-11	7.8346e-11	6.2268e-11	7.6648e-11	5.9659e-11	5.6506e-11
2024-05-29T17:48:17.363	4.49874e-09	8.25385e-10	5.38552e-10	5.88113e-10	1.67035e-10	1.13123e-10	8.7165e-11	1.58679e-10	1.3159e-10	1.2101e-10	8.074e-11	1.08243e-10	7.5594e-11	1.25598e-10	9.5276e-11	1.2741e-10	8.8913e-11	7.8904e-11	8.8885e-11	9.5263e-11	4.63718e-10	4.0479e-11	8.4679e-11	4.7182e-11	5.5553e-11	1.55899e-10	1.27794e-10	5.7154e-11	9.0294e-11	4.08815e-10	5.5775e-11	8.1365e-11	5.6496e-11	7.2105e-11	4.8177e-11	5.5146e-11	6.6866e-11	4.5805e-11	6.7951e-11	6.8452e-11	8.1108e-11	5.4428e-11	3.8726e-11	5.509e-11	5.8759e-11	4.8232e-11	6.2584e-11	6.8888e-11	4.4672e-11
2024-05-29T17:48:20.817	3.91799e-09	9.95574e-10	5.93019e-10	2.33832e-10	1.7884e-10	7.6086e-11	6.2766e-11	1.35233e-10	1.18345e-10	1.02975e-10	3.19838e-10	8.7909e-11	1.00929e-10	7.5895e-11	1.01677e-10	9.4221e-11	1.16258e-10	5.5793e-11	7.9501e-11	4.54227e-10	9.5838e-11	1.31156e-10	5.5079e-11	1.06813e-10	8.2057e-11	1.32066e-10	1.19541e-10	6.6741e-11	3.4754e-11	1.0507e-10	6.1098e-11	6.6434e-11	7.1463e-11	3.6052e-11	3.6418e-11	8.2207e-11	5.8645e-11	1.87e-11	6.5285e-11	3.797e-11	4.2748e-11	4.7136e-11	0	6.1593e-11	4.7977e-11	4.8232e-11	7.1356e-11	5.2614e-11	4.8936e-11
2024-05-29T17:48:24.276	3.92658e-09	1.16484e-09	4.03165e-10	1.71493e-10	1.73038e-10	1.4394e-10	1.02038e-10	9.4929e-11	1.30619e-10	7.6203e-11	4.73708e-10	1.24317e-10	1.04556e-10	5.7059e-11	5.9415e-11	8.7232e-11	1.45487e-10	6.0264e-11	6.4912e-11	1.07132e-10	1.06518e-10	7.5729e-11	6.4318e-11	6.4606e-11	9.4751e-11	1.10884e-10	7.4438e-11	7.5115e-11	7.5745e-11	6.5523e-11	5.5775e-11	8.1365e-11	4.7268e-11	5.0986e-11	4.4603e-11	5.8129e-11	3.71368e-10	4.1814e-11	8.8397e-11	9.4926e-11	1.9117e-11	6.3822e-11	2.7383e-11	7.7909e-11	6.4961e-11	3.11321e-10	5.2361e-11	0	8.4759e-11
2024-05-29T17:48:27.733	4.12231e-09	9.60055e-10	4.7918e-10	2.76075e-10	2.46789e-10	1.32936e-10	1.71072e-10	7.0963e-11	1.38197e-10	1.05399e-10	6.1326e-11	8.9315e-11	5.2278e-11	8.0693e-11	5.5007e-11	1.26401e-10	7.6586e-11	4.5555e-11	8.2747e-11	1.00711e-10	8.5404e-11	7.0112e-11	5.9877e-11	9.8688e-11	9.02e-11	1.21937e-10	1.08006e-10	2.5268e-10	7.1648e-11	7.0047e-11	6.5993e-11	8.6983e-11	7.7875e-11	5.7004e-11	7.5079e-11	4.8634e-11	4.26137e-10	2.6445e-11	9.7928e-11	7.1036e-11	3.8235e-11	2.7214e-11	2.7383e-11	8.2635e-11	5.8759e-11	3.60938e-10	5.2361e-11	4.8711e-11	3.9956e-11
2024-05-29T17:48:31.194	4.57737e-09	1.00758e-09	5.77009e-10	2.73057e-10	1.33015e-10	8.9005e-11	1.07412e-10	9.0644e-11	9.3048e-11	5.2699e-11	9.5006e-11	9.9858e-11	1.38315e-10	9.8828e-11	8.5512e-11	9.5558e-11	1.16258e-10	4.06819e-10	6.885e-11	9.3851e-11	1.25173e-10	9.4932e-11	5.7528e-11	6.2416e-11	7.8563e-11	9.8599e-11	4.62979e-10	5.1698e-11	9.0294e-11	6.3139e-11	6.5993e-11	5.6147e-11	9.621e-11	6.4994e-11	5.4628e-11	6.6277e-11	4.9066e-11	3.2389e-11	2.6653e-11	7.1036e-11	4.6828e-11	4.7136e-11	7.245e-11	6.4599e-11	7.062e-11	3.4105e-11	6.5638e-11	5.2614e-11	6.9206e-11
2024-05-29T17:48:34.656	4.18874e-09	5.91592e-10	5.83259e-10	2.81277e-10	1.53223e-10	9.5607e-11	1.48152e-10	1.25049e-10	5.01572e-10	9.1278e-11	1.16358e-10	8.3547e-11	1.27081e-10	7.5895e-11	9.3943e-11	7.4701e-11	1.07125e-10	2.20836e-10	5.6216e-11	7.1213e-11	5.6936e-11	5.4809e-11	4.9821e-11	9.2878e-11	7.3011e-11	1.48381e-10	1.19541e-10	1.14308e-10	6.2654e-11	4.6332e-11	7.2721e-11	7.5329e-11	8.5681e-11	5.4078e-11	6.8133e-11	5.8129e-11	6.939e-11	2.6445e-11	5.9597e-11	6.0037e-11	6.8929e-11	8.8183e-11	5.8089e-11	6.4599e-11	7.3286e-11	4.403e-11	4.8477e-11	4.4467e-11	3.4603e-11
2024-05-29T17:48:38.109	3.7314e-09	1.2286e-09	5.60003e-10	2.7457e-10	2.04575e-10	2.09464e-10	1.56466e-10	5.46051e-10	1.33511e-10	1.00494e-10	7.5939e-11	1.20244e-10	8.6334e-11	5.0044e-11	4.7638e-11	1.04436e-10	1.1292e-10	8.0531e-11	3.975e-11	8.3305e-11	5.9261e-11	5.7246e-11	3.7134e-11	1.00088e-10	1.17248e-10	1.19569e-10	1.11983e-10	1.1168e-10	1.05701e-10	5.808e-11	5.5775e-11	6.4017e-11	7.9898e-11	3.94522e-10	4.4603e-11	4.5026e-11	3.709e-11	5.6099e-11	5.3305e-11	5.023e-11	3.3112e-11	5.7729e-11	3.40921e-10	6.7471e-11	6.4961e-11	5.2097e-11	4.4253e-11	4.4467e-11	1.9978e-11
2024-05-29T17:48:41.575	4.28252e-09	9.49563e-10	4.49242e-10	2.52568e-10	1.41685e-10	1.56125e-10	4.93366e-10	7.2807e-11	1.33511e-10	1.13473e-10	7.427e-11	1.40335e-10	1.13664e-10	7.252e-11	5.7254e-11	8.7232e-11	1.19503e-10	4.5555e-11	6.072e-11	6.9314e-11	1.01319e-10	8.2627e-11	6.2137e-11	6.0146e-11	1.04602e-10	1.50296e-10	1.18315e-10	6.4479e-11	5.7633e-11	4.9531e-11	2.4943e-11	9.2259e-11	5.6496e-11	0	1.01385e-10	5.5146e-11	5.5636e-11	5.9134e-11	7.0516e-11	7.8278e-11	7.1531e-11	3.68646e-10	2.7383e-11	7.0226e-11	3.9173e-11	4.403e-11	7.1356e-11	4.8711e-11	7.4751e-11
2024-05-29T17:48:45.026	4.17747e-09	9.11522e-10	5.78055e-10	3.2564e-10	1.75963e-10	1.59026e-10	1.11272e-10	1.59512e-10	1.37273e-10	7.9447e-11	9.3677e-11	7.4056e-11	8.9166e-11	4.52335e-10	4.2013e-11	1.45096e-10	8.7468e-11	6.8332e-11	3.6287e-11	9.3851e-11	9.8616e-11	1.0187e-10	4.59925e-10	5.5326e-11	7.4907e-11	1.3098e-10	1.51786e-10	6.8931e-11	5.4951e-11	8.0249e-11	4.9886e-11	3.83283e-10	5.9254e-11	5.4078e-11	6.0393e-11	8.6219e-11	7.1825e-11	5.2891e-11	3.7692e-11	6.2967e-11	5.058e-11	5.4428e-11	2.7383e-11	5.8432e-11	5.5399e-11	5.9072e-11	5.2361e-11	7.7019e-11	7.4751e-11
2024-05-29T17:48:48.485	3.88694e-09	9.5167e-10	4.08377e-10	2.0555e-10	1.84459e-10	1.41808e-10	1.08714e-10	1.66821e-10	1.36342e-10	5.5043e-11	8.2278e-11	8.3547e-11	4.50265e-10	6.898e-11	8.8412e-11	8.7232e-11	7.1417e-11	1.20527e-10	8.5871e-11	9.5263e-11	9.0024e-11	4.425e-10	3.3214e-11	9.2878e-11	1.07251e-10	1.34205e-10	7.4438e-11	6.6741e-11	4.915e-11	6.5523e-11	6.3593e-11	6.4017e-11	7.9898e-11	6.2444e-11	3.6418e-11	7.5791e-11	4.1468e-11	5.2891e-11	3.7692e-11	9.3008e-11	5.058e-11	3.333e-11	4.7429e-11	1.15229e-10	5.5399e-11	8.806e-11	5.2361e-11	4.8711e-11	7.4751e-11
2024-05-29T17:48:51.944	4.77181e-09	7.97398e-10	3.84751e-10	2.42528e-10	2.11927e-10	9.5607e-11	1.18617e-10	1.0921e-10	1.094e-10	7.7842e-11	1.18493e-10	1.02324e-10	9.8436e-11	5.2486e-11	7.6154e-11	7.2984e-11	7.6586e-11	7.7242e-11	3.2456e-11	9.9377e-11	8.6971e-11	9.9153e-11	5.5079e-11	6.8779e-11	6.4871e-11	1.29885e-10	1.34461e-10	6.8931e-11	1.59264e-10	5.5377e-11	8.8187e-11	5.8887e-11	7.1463e-11	6.4994e-11	7.5079e-11	8.0125e-11	5.2454e-11	3.90014e-10	3.7692e-11	6.0037e-11	5.4072e-11	3.333e-11	0	8.0307e-11	3.9173e-11	5.2097e-11	3.53473e-10	2.8123e-11	7.7374e-11
2024-05-29T17:48:55.405	3.45015e-09	1.10314e-09	8.98484e-10	3.6691e-10	1.30432e-10	7.999e-11	1.11272e-10	9.9028e-11	8.2918e-11	7.6203e-11	4.67314e-10	7.5721e-11	1.03361e-10	6.5249e-11	4.7638e-11	1.04436e-10	7.3181e-11	5.0932e-11	5.1318e-11	4.82161e-10	1.1268e-10	1.13293e-10	7.9644e-11	7.6444e-11	6.9061e-11	1.20759e-10	1.02463e-10	7.5115e-11	8.1506e-11	6.5523e-11	8.8187e-11	8.1365e-11	6.1889e-11	6.7448e-11	6.3079e-11	6.8779e-11	5.5636e-11	4.9475e-11	2.6653e-11	6.0037e-11	3.8235e-11	5.0913e-11	4.7429e-11	6.4599e-11	3.9173e-11	3.9382e-11	9.6954e-11	4.4467e-11	3.9956e-11
2024-05-29T17:48:58.861	4.16294e-09	1.06494e-09	3.88644e-10	3.24957e-10	2.10316e-10	1.01781e-10	6.4969e-11	1.42857e-10	8.444e-11	4.23089e-10	8.6728e-11	1.10522e-10	1.23106e-10	8.0693e-11	5.7254e-11	7.8023e-11	1.27755e-10	6.0264e-11	7.9501e-11	9.3851e-11	9.1512e-11	7.9253e-11	3.7134e-11	4.4135e-11	7.8563e-11	9.7138e-11	9.1964e-11	1.00483e-10	6.5019e-11	7.0047e-11	5.2912e-11	9.7249e-11	6.4416e-11	5.0986e-11	1.8209e-11	4.12674e-10	5.2454e-11	4.5805e-11	2.6653e-11	7.8278e-11	4.6828e-11	5.7729e-11	6.1231e-11	5.1532e-11	2.75606e-10	2.7847e-11	6.2584e-11	3.9773e-11	6.3176e-11
2024-05-29T17:49:02.323	5.12292e-09	9.79341e-10	4.7027e-10	2.82746e-10	1.47567e-10	1.57098e-10	8.218e-11	1.00357e-10	8.444e-11	8.2564e-11	7.5939e-11	5.9077e-11	9.8436e-11	7.252e-11	6.9216e-11	5.7423e-11	7.4903e-11	4.95637e-10	4.59e-11	9.3851e-11	8.218e-11	4.0479e-11	4.3938e-11	9.7268e-11	1.35041e-10	1.3633e-10	3.99403e-10	6.4479e-11	8.3338e-11	8.2137e-11	7.8877e-11	7.5329e-11	5.9254e-11	4.7693e-11	6.5654e-11	8.2207e-11	3.2121e-11	5.9134e-11	4.2141e-11	8.4905e-11	6.3405e-11	4.7136e-11	6.422e-11	7.2877e-11	6.7849e-11	4.403e-11	4.8477e-11	5.9659e-11	4.8936e-11
2024-05-29T17:49:05.777	4.14836e-09	7.94041e-10	3.96363e-10	2.52568e-10	1.7884e-10	1.34076e-10	7.117e-11	4.83769e-10	1.00925e-10	1.17839e-10	4.7503e-11	9.2064e-11	7.3932e-11	5.2486e-11	5.5007e-11	7.8023e-11	7.9847e-11	1.11586e-10	7.9501e-11	8.3305e-11	4.3486e-11	1.10856e-10	4.6971e-11	6.8779e-11	5.2967e-11	1.35277e-10	1.40823e-10	7.1052e-11	7.3725e-11	5.5377e-11	8.0825e-11	5.6147e-11	4.3762e-11	6.9814e-11	4.4603e-11	6.3677e-11	5.2454e-11	1.09037e-10	6.7951e-11	9.865e-11	5.4072e-11	3.8486e-11	6.1231e-11	5.8432e-11	6.1938e-11	5.5694e-11	0	5.2614e-11	6.9206e-11
2024-05-29T17:49:09.236	3.69293e-09	9.9356e-10	5.64303e-10	2.82746e-10	1.19543e-10	8.5513e-11	1.32081e-10	1.15118e-10	1.2153e-10	8.4079e-11	8.527e-11	1.11644e-10	5.6832e-11	6.3301e-11	5.9415e-11	9.5558e-11	5.06968e-10	5.5793e-11	1.11254e-10	1.10806e-10	9.4418e-11	2.3371e-11	7.7893e-11	6.2416e-11	1.01885e-10	1.17153e-10	1.41854e-10	4.2211e-11	6.2654e-11	3.0331e-11	4.3203e-11	5.3266e-11	7.9898e-11	4.0308e-11	7.9372e-11	6.8779e-11	4.1468e-11	4.1814e-11	5.6539e-11	5.6956e-11	5.4072e-11	1.9243e-11	7.4992e-11	7.7909e-11	5.5399e-11	4.403e-11	3.9581e-11	6.2886e-11	6.626e-11
2024-05-29T17:49:12.699	5.70256e-09	1.05169e-09	4.86687e-10	2.62224e-10	1.70063e-10	9.2365e-11	1.31014e-10	1.50976e-10	1.22573e-10	1.36686e-10	9.6316e-11	8.0508e-11	1.19004e-10	8.9521e-11	6.737e-11	4.53271e-10	1.04718e-10	8.8217e-11	4.8684e-11	4.3225e-11	1.34535e-10	5.9583e-11	6.2137e-11	7.6444e-11	4.75528e-10	1.13433e-10	9.9577e-11	5.1698e-11	6.5019e-11	3.0331e-11	4.6664e-11	3.9702e-11	8.5681e-11	5.4078e-11	4.8177e-11	5.5146e-11	3.709e-11	5.9134e-11	4.6164e-11	6.0037e-11	6.8929e-11	3.8486e-11	6.422e-11	1.9477e-11	6.7849e-11	7.8763e-11	8.6265e-11	4.4467e-11	7.4751e-11
2024-05-29T17:49:16.154	4.77886e-09	9.21723e-10	4.01664e-10	2.30262e-10	1.6291e-10	1.44995e-10	8.8765e-11	1.02964e-10	1.2153e-10	1.3294e-10	8.2278e-11	1.08243e-10	6.499e-11	8.8111e-11	4.44052e-10	9.4221e-11	1.29735e-10	4.5555e-11	7.0736e-11	8.9484e-11	8.8511e-11	7.7511e-11	5.5079e-11	4.4916e-10	1.08551e-10	1.27665e-10	1.13278e-10	8.9543e-11	5.4951e-11	5.2535e-11	4.3203e-11	6.6434e-11	8.5681e-11	4.7693e-11	8.5409e-11	7.3528e-11	6.939e-11	3.2389e-11	6.2506e-11	7.3529e-11	5.058e-11	5.0913e-11	8.8732e-11	6.7471e-11	3.9173e-11	3.4105e-11	4.8477e-11	4.4467e-11	2.8253e-11
2024-05-29T17:49:19.613	3.71331e-09	1.06306e-09	4.17884e-10	1.95214e-10	1.48716e-10	9.2365e-11	1.72709e-10	8.1401e-11	1.33511e-10	1.17839e-10	6.902e-11	1.14945e-10	1.14752e-10	3.94362e-10	5.2666e-11	1.37003e-10	1.02254e-10	5.5793e-11	6.885e-11	8.3305e-11	6.3656e-11	4.0479e-11	4.13842e-10	9.2878e-11	9.3259e-11	1.44476e-10	1.10673e-10	7.7067e-11	5.4951e-11	8.7559e-11	6.3593e-11	4.18663e-10	8.1871e-11	6.4994e-11	5.7583e-11	4.8634e-11	6.939e-11	9.535e-11	6.5285e-11	3.797e-11	8.1108e-11	6.9382e-11	4.3297e-11	5.1532e-11	3.9173e-11	3.9382e-11	5.9372e-11	4.8711e-11	2.8253e-11
2024-05-29T17:49:23.070	4.66912e-09	1.31372e-09	5.44688e-10	2.3116e-10	1.10675e-10	1.72799e-10	9.7814e-11	1.05507e-10	9.9655e-11	5.0247e-11	6.7179e-11	1.11644e-10	4.38807e-10	1.03773e-10	7.2768e-11	5.9591e-11	1.04718e-10	5.0932e-11	4.8684e-11	9.8024e-11	8.3808e-11	4.62418e-10	6.6428e-11	8.9832e-11	7.1063e-11	1.08274e-10	9.8101e-11	5.4494e-11	1.2164e-10	8.579e-11	4.9886e-11	7.7393e-11	6.6847e-11	5.7004e-11	7.5079e-11	5.8129e-11	4.5426e-11	7.7101e-11	4.6164e-11	7.1036e-11	4.2748e-11	6.666e-11	3.8726e-11	5.1532e-11	6.1938e-11	4.8232e-11	6.8557e-11	6.8888e-11	6.3176e-11
2024-05-29T17:49:26.529	3.7115e-09	1.31829e-09	3.73605e-10	5.97892e-10	1.15195e-10	1.34076e-10	1.65214e-10	1.38141e-10	1.094e-10	8.2564e-11	7.0813e-11	8.2042e-11	5.6832e-11	3.165e-11	4.2013e-11	9.8176e-11	8.8913e-11	6.0264e-11	4.8684e-11	8.798e-11	4.55489e-10	7.0112e-11	9.3943e-11	8.1722e-11	8.5407e-11	1.17153e-10	9.9577e-11	8.0828e-11	8.6885e-11	4.44398e-10	7.055e-11	9.3952e-11	2.5266e-11	5.9786e-11	6.3079e-11	5.8129e-11	5.5636e-11	4.5805e-11	4.6164e-11	6.0037e-11	2.7036e-11	3.8486e-11	7.245e-11	3.8955e-11	6.4961e-11	5.9072e-11	3.9581e-11	6.8888e-11	5.2857e-11
2024-05-29T17:49:29.987	3.4696e-09	1.09768e-09	4.33498e-10	2.0555e-10	1.49855e-10	1.37438e-10	8.5536e-11	7.8077e-11	9.027e-11	8.8469e-11	7.9172e-11	9.4733e-11	1.34674e-10	6.7141e-11	1.06521e-10	8.1209e-11	8.7468e-11	5.5793e-11	6.072e-11	4.57448e-10	1.10256e-10	1.28005e-10	5.9877e-11	6.8779e-11	9.02e-11	1.15926e-10	9.6603e-11	6.4479e-11	4.07158e-10	6.0662e-11	9.8201e-11	8.5151e-11	3.9949e-11	8.455e-11	4.8177e-11	4.5026e-11	7.1825e-11	0	6.2506e-11	5.023e-11	7.1531e-11	6.3822e-11	3.8726e-11	6.7471e-11	5.1821e-11	3.9382e-11	3.4278e-11	7.4408e-11	7.2032e-11
2024-05-29T17:49:33.453	3.82935e-09	1.0089e-09	3.93303e-10	2.55827e-10	1.59746e-10	1.10397e-10	1.43325e-10	1.0799e-10	1.5389e-10	9.9229e-11	7.7572e-11	1.05915e-10	8.0373e-11	7.7527e-11	7.2768e-11	9.8176e-11	9.9728e-11	7.2029e-11	9.4625e-11	8.9484e-11	7.3504e-11	4.3722e-11	7.9644e-11	7.4601e-11	9.9093e-11	1.40462e-10	1.26648e-10	5.1698e-11	7.9632e-11	6.3139e-11	4.9886e-11	7.9404e-11	5.0532e-11	4.4155e-11	6.0393e-11	4.8634e-11	4.08837e-10	6.4778e-11	6.5285e-11	7.1036e-11	3.3112e-11	5.4428e-11	7.7452e-11	6.7471e-11	2.7699e-11	3.2949e-10	3.4278e-11	4.4467e-11	3.9956e-11
2024-05-29T17:49:36.905	4.36351e-09	1.2703e-09	6.01115e-10	2.41672e-10	2.31861e-10	1.32936e-10	1.66909e-10	1.23985e-10	6.3831e-11	8.2564e-11	1.03833e-10	8.5026e-11	8.1904e-11	8.3739e-11	5.0215e-11	9.4221e-11	8.4502e-11	8.369e-11	6.072e-11	7.6629e-11	6.9732e-11	6.4002e-11	5.7528e-11	7.0773e-11	8.5407e-11	1.04238e-10	1.09348e-10	4.8741e-11	1.09902e-10	6.3139e-11	4.9886e-11	5.0219e-11	5.9254e-11	9.3667e-11	6.5654e-11	3.63945e-10	4.5426e-11	6.9968e-11	6.7951e-11	5.023e-11	7.8823e-11	5.4428e-11	5.123e-11	4.7709e-11	3.44298e-10	2.7847e-11	4.8477e-11	2.8123e-11	5.6506e-11
2024-05-29T17:49:40.364	5.03142e-09	8.27002e-10	6.08607e-10	3.2564e-10	2.06231e-10	1.10397e-10	7.312e-11	8.3013e-11	9.5746e-11	1.02975e-10	1.28639e-10	7.2354e-11	5.2278e-11	5.0044e-11	8.0969e-11	7.9632e-11	9.7138e-11	4.61771e-10	9.6006e-11	1.16672e-10	6.5744e-11	8.5869e-11	4.3938e-11	8.6679e-11	8.3749e-11	1.23104e-10	4.64865e-10	4.5593e-11	9.9824e-11	4.6332e-11	7.8877e-11	6.6434e-11	6.1889e-11	8.455e-11	6.3079e-11	5.1992e-11	9.9869e-11	3.7399e-11	5.9597e-11	5.3698e-11	5.4072e-11	5.4428e-11	7.7452e-11	6.1593e-11	2.7699e-11	3.4105e-11	4.4253e-11	6.2886e-11	7.9912e-11
2024-05-29T17:49:43.824	4.49874e-09	9.39664e-10	5.46902e-10	3.97265e-10	2.24404e-10	1.32936e-10	1.24406e-10	1.21829e-10	9.3048e-11	1.1458e-10	8.2278e-11	6.3156e-11	8.0373e-11	4.187e-11	6.737e-11	1.15945e-10	1.14044e-10	8.8217e-11	8.2747e-11	6.9314e-11	7.1643e-11	6.1833e-11	5.5079e-11	7.8243e-11	9.3259e-11	1.00039e-10	8.8736e-11	7.7067e-11	7.9632e-11	7.6332e-11	4.3203e-11	4.3491e-11	8.1871e-11	3.6052e-11	4.33976e-10	4.5026e-11	6.6866e-11	4.1814e-11	3.7692e-11	4.6504e-11	5.058e-11	1.9243e-11	5.123e-11	3.5005e-10	3.9173e-11	7.3676e-11	2.7988e-11	4.4467e-11	8.4759e-11
2024-05-29T17:49:47.282	3.97938e-09	8.87012e-10	5.46902e-10	2.66143e-10	1.88112e-10	1.14462e-10	7.312e-11	1.37179e-10	1.10558e-10	1.04194e-10	9.6316e-11	8.2042e-11	8.3407e-11	8.0693e-11	8.8412e-11	5.32282e-10	8.7468e-11	1.16143e-10	4.2935e-11	1.34722e-10	2.8468e-11	2.8623e-11	5.2516e-11	6.4606e-11	4.56258e-10	1.056e-10	1.02463e-10	8.6163e-11	1.15267e-10	8.2137e-11	4.6664e-11	8.8776e-11	5.3597e-11	5.9786e-11	3.1539e-11	5.5146e-11	4.5426e-11	5.6099e-11	7.7705e-11	4.2452e-11	7.8823e-11	4.3029e-11	4.3297e-11	8.7105e-11	7.3286e-11	4.8232e-11	3.4278e-11	5.9659e-11	6.3176e-11
2024-05-29T17:49:50.738	3.45989e-09	9.49563e-10	6.02621e-10	2.28456e-10	1.38036e-10	1.52172e-10	1.39343e-10	1.13961e-10	1.094e-10	1.15677e-10	1.05033e-10	8.5026e-11	1.05738e-10	5.9212e-11	4.635e-10	1.06837e-10	1.31686e-10	6.4424e-11	5.8511e-11	6.3274e-11	6.3656e-11	3.6952e-11	7.7893e-11	4.29849e-10	7.3011e-11	1.17153e-10	9.1964e-11	6.6741e-11	4.5975e-11	4.9531e-11	6.1098e-11	7.1021e-11	7.1463e-11	7.8574e-11	4.0717e-11	5.8129e-11	6.939e-11	3.2389e-11	9.2327e-11	5.3698e-11	5.058e-11	3.8486e-11	5.123e-11	5.8432e-11	6.4961e-11	7.3676e-11	4.4253e-11	0	7.4751e-11
2024-05-29T17:49:54.197	3.61774e-09	9.00463e-10	6.24291e-10	2.51746e-10	1.41685e-10	1.18388e-10	6.9165e-11	1.37179e-10	8.444e-11	6.926e-11	9.3677e-11	5.2366e-11	9.0548e-11	4.86478e-10	7.7792e-11	1.12616e-10	8.5997e-11	9.111e-11	3.6287e-11	6.7361e-11	1.11475e-10	9.0514e-11	4.37806e-10	8.6679e-11	9.622e-11	1.10884e-10	1.19541e-10	3.8533e-11	4.915e-11	5.5377e-11	5.5775e-11	1.05041e-10	5.3597e-11	6.2444e-11	9.1046e-11	5.8129e-11	6.6866e-11	7.4799e-11	3.2643e-11	6.2967e-11	5.058e-11	5.7729e-11	7.245e-11	8.49e-11	5.5399e-11	4.8232e-11	3.4278e-11	5.2614e-11	5.6506e-11
2024-05-29T17:49:57.656	4.2351e-09	1.26925e-09	5.79621e-10	2.23877e-10	4.0915e-10	1.44995e-10	1.2327e-10	1.34249e-10	1.28655e-10	6.926e-11	6.1326e-11	8.5026e-11	9.4574e-11	6.5249e-11	9.9166e-11	1.00727e-10	6.9609e-11	5.8071e-11	5.3822e-11	8.6449e-11	6.1498e-11	4.3722e-11	4.9821e-11	7.2713e-11	6.6999e-11	1.37374e-10	1.23146e-10	5.4494e-11	1.01325e-10	7.4296e-11	7.8877e-11	7.1021e-11	5.9254e-11	8.0615e-11	7.7255e-11	7.5791e-11	7.1825e-11	5.2891e-11	3.2643e-11	4.30844e-10	7.8823e-11	4.3029e-11	4.7429e-11	5.1532e-11	7.3286e-11	5.5694e-11	4.4253e-11	3.9773e-11	3.60712e-10
2024-05-29T17:50:01.114	5.00458e-09	6.60915e-10	4.29296e-10	2.99119e-10	1.96083e-10	1.14462e-10	1.02038e-10	9.6314e-11	4.5135e-11	8.4079e-11	6.5287e-11	1.20244e-10	9.4574e-11	5.482e-11	9.7886e-11	7.9632e-11	7.9847e-11	3.9452e-11	5.6216e-11	9.8024e-11	5.9261e-11	8.5869e-11	7.4268e-11	7.6444e-11	9.9093e-11	1.43483e-10	1.34461e-10	5.1698e-11	9.83e-11	1.03601e-10	4.3203e-11	5.3266e-11	3.9949e-11	1.01971e-10	4.0717e-11	8.6219e-11	7.1825e-11	5.6099e-11	3.82536e-10	6.8452e-11	7.8823e-11	4.7136e-11	6.7075e-11	3.8955e-11	7.062e-11	5.2097e-11	3.4278e-11	3.67224e-10	4.4672e-11
2024-05-29T17:50:04.573	3.60098e-09	1.26714e-09	6.71842e-10	2.73815e-10	9.9334e-11	8.7277e-11	9.188e-11	1.47423e-10	8.5935e-11	9.4003e-11	9.6316e-11	1.01098e-10	7.3932e-11	5.9212e-11	8.9827e-11	1.04436e-10	9.3116e-11	5.0932e-11	6.4912e-11	4.74067e-10	8.052e-11	9.201e-11	8.7876e-11	9.1368e-11	9.9093e-11	1.2426e-10	8.3661e-11	9.7483e-11	4.30587e-10	7.6332e-11	8.9934e-11	4.3491e-11	5.6496e-11	6.9814e-11	4.4603e-11	6.8779e-11	6.4243e-11	7.9336e-11	3.2643e-11	1.8985e-11	5.4072e-11	5.7729e-11	6.422e-11	6.1593e-11	4.3797e-11	2.7847e-11	5.2361e-11	6.2886e-11	2.8253e-11
2024-05-29T17:50:08.032	4.04815e-09	1.3349e-09	5.63231e-10	3.06641e-10	1.9434e-10	9.0701e-11	8.8765e-11	9.6314e-11	7.4848e-11	8.2564e-11	8.074e-11	1.07086e-10	8.0373e-11	1.02559e-10	8.2511e-11	1.15945e-10	9.5816e-11	8.5226e-11	4.6668e-10	7.6629e-11	7.8825e-11	6.8136e-11	5.5079e-11	5.5326e-11	8.2057e-11	1.17153e-10	1.0103e-10	4.12505e-10	4.2565e-11	9.9061e-11	3.5275e-11	3.0753e-11	5.6496e-11	7.8574e-11	7.0524e-11	6.3677e-11	3.709e-11	4.1814e-11	4.2141e-11	8.4905e-11	7.1531e-11	2.7214e-11	5.123e-11	1.9477e-11	7.8346e-11	5.5694e-11	6.8557e-11	6.8888e-11	4.8936e-11
2024-05-29T17:50:11.491	3.50628e-09	8.00742e-10	4.99553e-10	3.75281e-10	1.20958e-10	1.31785e-10	5.0325e-11	1.02964e-10	1.40028e-10	5.1781e-10	7.427e-11	9.07e-11	9.5879e-11	8.6678e-11	7.2768e-11	9.5558e-11	1.07125e-10	8.2125e-11	1.00036e-10	1.16672e-10	1.26247e-10	2.8623e-11	5.2516e-11	8.6679e-11	9.02e-11	1.3098e-10	9.6603e-11	6.2133e-11	1.04263e-10	8.579e-11	7.055e-11	7.9404e-11	6.4416e-11	1.8026e-11	6.0393e-11	3.6764e-10	4.9066e-11	8.151e-11	5.3305e-11	4.2452e-11	6.8929e-11	5.4428e-11	6.422e-11	7.0226e-11	3.64329e-10	2.7847e-11	6.8557e-11	4.8711e-11	5.2857e-11
2024-05-29T17:50:14.949	3.43058e-09	1.08606e-09	4.5459e-10	3.07316e-10	1.26459e-10	1.6093e-10	1.24406e-10	5.53284e-10	9.5746e-11	9.6652e-11	9.5006e-11	1.03535e-10	7.5594e-11	4.187e-11	7.448e-11	1.21291e-10	1.29735e-10	8.5226e-11	6.4912e-11	7.8351e-11	5.4512e-11	5.4809e-11	4.9821e-11	7.2713e-11	8.5407e-11	1.38411e-10	1.05271e-10	4.8741e-11	8.6885e-11	4.6332e-11	7.2721e-11	1.01996e-10	6.6847e-11	3.6052e-11	7.7255e-11	8.6219e-11	7.4181e-11	5.9134e-11	4.6164e-11	6.0037e-11	6.8929e-11	5.4428e-11	7.9836e-11	6.1593e-11	3.9173e-11	3.4105e-11	6.8557e-11	5.2614e-11	2.8253e-11
2024-05-29T17:50:18.409	3.70732e-09	8.52454e-10	4.18607e-10	2.36475e-10	1.72052e-10	1.20934e-10	4.79482e-10	7.9756e-11	8.5935e-11	1.26108e-10	8.2278e-11	8.7909e-11	8.1904e-11	9.3623e-11	8.4025e-11	9.946e-11	1.1735e-10	5.5793e-11	6.691e-11	7.4867e-11	1.01319e-10	3.3051e-11	5.7528e-11	8.1722e-11	9.02e-11	1.02857e-10	1.15823e-10	7.7067e-11	4.5975e-11	5.2535e-11	4.9886e-11	4.6976e-11	8.1871e-11	5.7004e-11	7.0524e-11	7.1193e-11	2.6227e-11	5.9134e-11	6.5285e-11	7.1036e-11	4.6828e-11	3.64606e-10	3.8726e-11	2.7545e-11	6.4961e-11	5.2097e-11	7.9163e-11	6.5955e-11	4.4672e-11
2024-05-29T17:50:21.868	3.99794e-09	1.21384e-09	4.67693e-10	1.98372e-10	1.36798e-10	1.23428e-10	9.9242e-11	1.29209e-10	8.8848e-11	1.25108e-10	9.0961e-11	1.33973e-10	1.11457e-10	5.7059e-11	4.01089e-10	9.149e-11	9.5816e-11	5.0932e-11	7.0736e-11	6.535e-11	7.8825e-11	5.9583e-11	8.6292e-11	5.0044e-11	1.07251e-10	1.23104e-10	1.26648e-10	8.787e-11	6.9508e-11	4.2895e-11	8.6406e-11	3.9702e-11	4.7268e-11	3.1222e-11	5.1504e-11	4.8634e-11	6.939e-11	3.2389e-11	7.0516e-11	6.2967e-11	3.26678e-10	2.7214e-11	8.215e-11	5.8432e-11	5.5399e-11	4.8232e-11	7.1356e-11	5.6247e-11	6.3176e-11
2024-05-29T17:50:25.326	4.56559e-09	1.22969e-09	4.1571e-10	2.61432e-10	5.2821e-10	1.11769e-10	1.472e-10	1.31254e-10	1.27661e-10	9.5337e-11	6.3337e-11	8.3547e-11	6.6874e-11	1.13015e-10	9.9166e-11	8.8674e-11	1.03493e-10	3.6014e-11	5.6216e-11	9.9377e-11	7.7092e-11	5.2258e-11	5.2516e-11	6.8779e-11	6.9061e-11	1.40462e-10	1.35535e-10	9.2801e-11	8.1506e-11	8.9293e-11	8.4586e-11	6.1506e-11	7.3662e-11	6.7448e-11	6.8133e-11	6.8779e-11	6.1508e-11	4.5805e-11	6.5285e-11	3.9277e-10	6.3405e-11	3.333e-11	5.8089e-11	5.1532e-11	1.9586e-11	7.0996e-11	4.4253e-11	7.9545e-11	3.03639e-10
2024-05-29T17:50:28.783	4.10431e-09	1.06369e-09	4.92856e-10	2.81277e-10	1.70063e-10	1.55146e-10	1.50975e-10	1.28185e-10	8.8848e-11	8.8469e-11	3.5407e-11	2.95805e-10	8.4883e-11	8.3739e-11	9.659e-11	8.5766e-11	1.03493e-10	9.111e-11	8.8885e-11	1.16672e-10	4.38261e-10	6.6102e-11	9.5399e-11	1.06813e-10	8.7034e-11	9.1061e-11	1.30056e-10	6.8931e-11	6.2654e-11	4.2895e-11	7.2721e-11	8.1365e-11	5.9254e-11	6.2444e-11	7.0524e-11	5.1992e-11	4.9066e-11	4.1814e-11	6.2506e-11	6.5767e-11	3.8235e-11	5.4428e-11	5.4767e-11	2.7545e-11	2.7699e-11	4.8232e-11	3.4278e-11	5.9659e-11	6.9206e-11
2024-05-29T17:50:32.241	4.58325e-09	1.38017e-09	4.32102e-10	2.6692e-10	1.18111e-10	1.59026e-10	8.3875e-11	9.2094e-11	1.24631e-10	1.02975e-10	9.6316e-11	9.8602e-11	1.12566e-10	8.6678e-11	7.2768e-11	1.08017e-10	1.05928e-10	6.2378e-11	6.285e-11	1.15523e-10	9.1512e-11	9.3482e-11	5.5079e-11	7.6444e-11	8.3749e-11	1.32066e-10	1.23146e-10	9.2801e-11	8.8606e-11	5.808e-11	6.3593e-11	7.9404e-11	5.9254e-11	6.2444e-11	3.6418e-11	6.6277e-11	3.709e-11	3.87315e-10	6.5285e-11	6.0037e-11	2.7036e-11	3.333e-11	5.4767e-11	6.4599e-11	5.8759e-11	4.403e-11	3.72885e-10	8.437e-11	7.7374e-11
2024-05-29T17:50:35.704	4.01643e-09	6.38295e-10	5.51304e-10	2.63012e-10	2.07055e-10	1.44995e-10	1.39343e-10	1.23985e-10	7.653e-11	9.6652e-11	5.16257e-10	1.07086e-10	9.4574e-11	8.8111e-11	5.9415e-11	9.5558e-11	9.3116e-11	9.111e-11	6.285e-11	1.23345e-10	1.17377e-10	7.9253e-11	5.7528e-11	7.6444e-11	9.02e-11	1.67397e-10	1.11983e-10	8.9543e-11	5.4951e-11	9.5916e-11	1.7637e-11	1.10881e-10	7.3662e-11	3.6052e-11	7.0524e-11	3.1839e-11	3.70441e-10	3.2389e-11	5.9597e-11	5.6956e-11	8.9668e-11	3.8486e-11	2.7383e-11	8.49e-11	7.3286e-11	3.35322e-10	5.5976e-11	5.6247e-11	4.4672e-11
2024-05-29T17:50:39.159	4.09116e-09	1.15743e-09	5.49107e-10	2.29361e-10	1.4288e-10	1.69236e-10	1.17425e-10	1.38141e-10	7.8176e-11	4.80376e-10	6.1326e-11	1.33973e-10	1.29021e-10	7.5895e-11	5.0215e-11	8.5766e-11	1.08309e-10	5.0932e-11	4.25348e-10	7.6629e-11	7.5319e-11	4.6741e-11	8.4679e-11	4.4135e-11	6.9061e-11	1.3944e-10	1.14558e-10	5.9696e-11	1.04263e-10	9.4303e-11	6.1098e-11	6.1506e-11	3.9949e-11	5.4078e-11	6.0393e-11	5.1992e-11	3.709e-11	4.5805e-11	6.2506e-11	4.6504e-11	5.4072e-11	4.7136e-11	6.7075e-11	6.1593e-11	3.3925e-11	5.5694e-11	3.9581e-11	5.2614e-11	6.3176e-11
2024-05-29T17:50:42.623	4.00467e-09	1.00824e-09	5.46902e-10	2.97035e-10	2.06231e-10	1.62812e-10	1.59141e-10	1.10417e-10	1.37273e-10	9.9229e-11	7.7572e-11	1.11644e-10	1.36507e-10	8.8111e-11	5.0215e-11	1.20241e-10	4.79345e-10	6.4424e-11	9.6006e-11	9.2418e-11	1.02643e-10	6.4002e-11	5.7528e-11	7.8243e-11	7.6757e-11	4.82739e-10	1.03877e-10	1.156e-10	7.1648e-11	6.7822e-11	4.9886e-11	6.8765e-11	6.6847e-11	6.7448e-11	2.5752e-11	1.8382e-11	4.5426e-11	6.202e-11	6.5285e-11	8.2755e-11	5.4072e-11	2.7214e-11	5.4767e-11	5.8432e-11	5.1821e-11	3.4105e-11	3.4278e-11	4.4467e-11	1.23153e-10
2024-05-29T17:50:46.076	4.83906e-09	1.12353e-09	4.7027e-10	2.1635e-10	1.89014e-10	1.66513e-10	1.27754e-10	8.917e-11	7.653e-11	7.7842e-11	2.2393e-11	1.14945e-10	4.9845e-11	7.7527e-11	7.9396e-11	9.8176e-11	7.4903e-11	7.3808e-11	6.072e-11	9.3851e-11	7.5319e-11	5.2258e-11	6.4318e-11	1.05502e-10	3.32051e-10	9.7138e-11	1.11983e-10	6.2133e-11	9.9824e-11	3.9157e-11	6.1098e-11	6.4017e-11	9.621e-11	3.90382e-10	8.7328e-11	7.3528e-11	4.5426e-11	7.4799e-11	8.8397e-11	5.6956e-11	8.7607e-11	7.2001e-11	6.1231e-11	6.1593e-11	7.062e-11	5.5694e-11	5.9372e-11	7.9545e-11	6.9206e-11
2024-05-29T17:50:49.533	4.26677e-09	9.58663e-10	5.07355e-10	3.03245e-10	1.86294e-10	1.95936e-10	8.5536e-11	1.18521e-10	9.837e-11	1.02975e-10	1.01389e-10	6.6987e-11	6.1047e-11	8.3739e-11	4.98856e-10	8.5766e-11	1.1292e-10	7.0205e-11	6.4912e-11	7.6629e-11	6.7768e-11	4.3722e-11	4.9821e-11	4.28877e-10	8.8631e-11	9.8599e-11	1.02463e-10	8.4422e-11	7.7713e-11	6.0662e-11	5.5775e-11	7.5329e-11	7.5798e-11	6.4994e-11	5.7583e-11	4.8634e-11	3.2121e-11	6.7423e-11	4.6164e-11	7.5941e-11	5.7352e-11	6.3822e-11	6.9814e-11	8.2635e-11	3.9173e-11	6.5307e-11	3.9581e-11	6.5955e-11	8.2371e-11
2024-05-29T17:50:52.994	3.8904e-09	8.74881e-10	5.81703e-10	2.81277e-10	2.1669e-10	1.59026e-10	1.2885e-10	1.15118e-10	1.23606e-10	3.8921e-11	9.3677e-11	9.8602e-11	8.7761e-11	5.08627e-10	7.7792e-11	1.42449e-10	6.9609e-11	8.6734e-11	5.3822e-11	6.3274e-11	4.3486e-11	7.5729e-11	4.62317e-10	9.1368e-11	1.23085e-10	1.55899e-10	6.8309e-11	7.7067e-11	6.7301e-11	5.5377e-11	6.1098e-11	7.1021e-11	3.9949e-11	6.4994e-11	5.1504e-11	7.1193e-11	4.1468e-11	5.9134e-11	5.3305e-11	5.023e-11	6.0454e-11	4.3029e-11	2.7383e-11	3.3736e-11	6.1938e-11	7.0996e-11	3.4278e-11	7.1701e-11	6.626e-11
2024-05-29T17:50:56.450	4.3496e-09	1.17809e-09	6.32942e-10	2.49266e-10	2.01221e-10	1.15786e-10	1.19797e-10	1.52721e-10	6.1803e-11	7.9447e-11	8.9572e-11	8.5026e-11	4.61438e-10	5.0044e-11	1.10015e-10	1.13737e-10	9.0336e-11	6.4424e-11	4.59e-11	9.9377e-11	1.09024e-10	3.41882e-10	7.0457e-11	9.5827e-11	1.08551e-10	1.18367e-10	1.03877e-10	1.04822e-10	8.8606e-11	3.5023e-11	6.5993e-11	6.4017e-11	5.0532e-11	8.2606e-11	5.1504e-11	7.3528e-11	5.2454e-11	8.3628e-11	8.6364e-11	6.8452e-11	5.058e-11	5.4428e-11	2.7383e-11	3.8955e-11	4.3797e-11	5.2097e-11	6.5638e-11	6.2886e-11	6.3176e-11
2024-05-29T17:50:59.910	3.14169e-09	6.30928e-10	5.64838e-10	2.54203e-10	1.25106e-10	1.34076e-10	1.20966e-10	1.34249e-10	9.837e-11	7.4528e-11	5.4852e-11	5.09421e-10	5.8978e-11	5.7059e-11	6.9216e-11	7.4701e-11	9.9728e-11	1.01864e-10	5.8511e-11	7.6629e-11	8.8511e-11	7.2033e-11	5.9877e-11	3.7301e-11	1.12361e-10	9.4149e-11	1.23146e-10	4.2211e-11	5.2131e-11	9.7501e-11	5.8497e-11	7.7393e-11	4.7268e-11	2.5493e-11	5.7583e-11	4.8634e-11	5.2454e-11	3.91803e-10	5.9597e-11	5.3698e-11	4.2748e-11	7.4528e-11	5.123e-11	6.7471e-11	4.7977e-11	3.9382e-11	3.64385e-10	5.2614e-11	7.2032e-11
2024-05-29T17:51:03.368	3.56907e-09	1.26819e-09	5.68038e-10	2.23877e-10	1.50986e-10	1.31785e-10	8.7165e-11	1.01669e-10	7.4848e-11	9.9229e-11	4.58102e-10	1.03535e-10	1.03361e-10	6.3301e-11	5.2666e-11	1.04436e-10	8.8913e-11	4.8318e-11	7.4366e-11	8.9484e-11	9.9977e-11	7.2033e-11	4.6971e-11	6.8779e-11	8.0329e-11	1.04238e-10	1.18315e-10	7.5115e-11	6.9508e-11	6.5523e-11	4.3203e-11	3.551e-11	2.5266e-11	5.4078e-11	5.4628e-11	5.1992e-11	1.7691e-10	4.5805e-11	7.7705e-11	6.0037e-11	5.058e-11	4.3029e-11	7.4992e-11	8.49e-11	6.1938e-11	3.9382e-11	4.4253e-11	7.9545e-11	7.7374e-11
2024-05-29T17:51:06.830	4.30291e-09	1.28129e-09	5.31777e-10	2.51746e-10	2.44713e-10	1.4394e-10	7.8682e-11	1.31254e-10	8.7404e-11	8.703e-11	7.2562e-11	6.3156e-11	7.2232e-11	4.7476e-11	9.7886e-11	1.06837e-10	9.0336e-11	8.9675e-11	4.64984e-10	9.0963e-11	1.1622e-10	5.2258e-11	8.4679e-11	5.0044e-11	8.5407e-11	1.2878e-10	1.05271e-10	7.5115e-11	3.8856e-11	4.9531e-11	3.5275e-11	4.6976e-11	7.5798e-11	5.9786e-11	6.5654e-11	6.0966e-11	8.4985e-11	8.5693e-11	4.6164e-11	2.6849e-11	7.1531e-11	4.3029e-11	6.1231e-11	7.0226e-11	6.4961e-11	3.9382e-11	5.9372e-11	4.8711e-11	3.4603e-11
2024-05-29T17:51:10.285	4.04649e-09	1.30556e-09	3.76825e-10	2.68468e-10	1.6291e-10	1.06177e-10	1.13773e-10	1.3226e-10	6.1803e-11	4.40054e-10	9.8885e-11	8.7909e-11	7.722e-11	1.04973e-10	3.8896e-11	7.8023e-11	1.0948e-10	7.0205e-11	8.4323e-11	6.3274e-11	6.9732e-11	4.0479e-11	4.6971e-11	5.2751e-11	1.19617e-10	1.14687e-10	9.1964e-11	6.2133e-11	6.0196e-11	7.0047e-11	7.2721e-11	4.3491e-11	8.1871e-11	4.7693e-11	9.2849e-11	9.7268e-11	3.709e-11	3.7399e-11	7.5385e-11	5.6956e-11	5.4072e-11	3.8486e-11	3.8726e-11	8.0307e-11	6.7849e-11	2.7847e-11	5.2361e-11	8.8934e-11	5.6506e-11
2024-05-29T17:51:13.743	4.28567e-09	1.13887e-09	4.45188e-10	2.2572e-10	1.39263e-10	1.44995e-10	1.45275e-10	1.23985e-10	1.02179e-10	1.12355e-10	1.02618e-10	1.16024e-10	1.50364e-10	1.02559e-10	5.9415e-11	1.03214e-10	1.1735e-10	4.54695e-10	7.9501e-11	1.20055e-10	7.3504e-11	7.7511e-11	6.2137e-11	6.0146e-11	9.1742e-11	1.46441e-10	9.6603e-11	5.4494e-11	9.3578e-11	7.0047e-11	3.9439e-11	6.6434e-11	5.3597e-11	4.7693e-11	7.2837e-11	7.7988e-11	5.2454e-11	6.202e-11	5.3305e-11	6.2967e-11	8.7607e-11	5.7729e-11	6.9814e-11	6.7471e-11	6.4961e-11	5.2097e-11	4.8477e-11	8.8934e-11	3.4603e-11
2024-05-29T17:51:17.201	4.01643e-09	1.18769e-09	4.00911e-10	2.72298e-10	1.35549e-10	1.03267e-10	1.13773e-10	1.01669e-10	4.35559e-10	4.2039e-11	1.03833e-10	1.03535e-10	1.251e-10	1.02559e-10	7.6154e-11	9.5558e-11	1.19503e-10	4.45182e-10	7.7827e-11	9.0963e-11	1.1622e-10	6.1833e-11	1.6607e-11	8.5059e-11	8.0329e-11	1.15926e-10	1.32279e-10	5.1698e-11	6.2654e-11	6.3139e-11	4.9886e-11	5.8887e-11	6.6847e-11	6.4994e-11	3.6418e-11	7.3528e-11	5.8645e-11	6.9968e-11	5.6539e-11	5.6956e-11	4.6828e-11	7.4528e-11	3.3538e-11	6.1593e-11	5.5399e-11	5.2097e-11	5.5976e-11	4.4467e-11	3.9956e-11
2024-05-29T17:51:20.661	4.24463e-09	1.16956e-09	5.86358e-10	2.4338e-10	2.34778e-10	1.34076e-10	9.4893e-11	1.12792e-10	5.06847e-10	8.102e-11	1.36212e-10	1.11644e-10	9.3252e-11	5.7059e-11	4.2013e-11	8.7232e-11	1.05928e-10	5.8071e-11	1.07645e-10	7.8351e-11	9.1512e-11	6.6102e-11	4.6971e-11	5.7786e-11	9.1742e-11	1.2654e-10	1.27794e-10	1.00483e-10	5.7633e-11	5.808e-11	6.1098e-11	6.4017e-11	6.1889e-11	5.9786e-11	3.69607e-10	6.8779e-11	5.8645e-11	5.2891e-11	7.9958e-11	6.8452e-11	7.4041e-11	7.2001e-11	5.4767e-11	3.72623e-10	9.7932e-11	5.9072e-11	1.9791e-11	1.9886e-11	5.6506e-11
2024-05-29T17:51:24.119	4.3465e-09	9.52372e-10	5.40232e-10	2.63798e-10	1.58678e-10	1.10397e-10	1.22124e-10	1.18521e-10	1.05851e-10	1.00494e-10	7.2562e-11	1.17094e-10	7.8812e-11	5.9212e-11	4.4913e-11	1.08017e-10	5.06468e-10	7.2029e-11	8.7391e-11	3.6532e-11	1.06518e-10	8.0958e-11	8.6292e-11	7.8243e-11	7.8563e-11	9.4149e-11	1.11983e-10	7.5115e-11	4.5975e-11	8.3983e-11	6.1098e-11	7.1021e-11	3.5731e-11	5.9786e-11	6.8133e-11	5.1992e-11	6.939e-11	4.1814e-11	6.7951e-11	5.3698e-11	9.5587e-11	2.7214e-11	4.3297e-11	7.0226e-11	3.3925e-11	4.8232e-11	6.2584e-11	7.1701e-11	2.8253e-11
2024-05-29T17:51:27.579	4.24304e-09	9.50266e-10	4.27886e-10	2.28456e-10	2.15904e-10	1.62812e-10	1.25532e-10	1.51851e-10	1.05851e-10	1.18906e-10	8.6728e-11	9.7329e-11	6.6874e-11	8.0693e-11	4.7638e-11	1.00727e-10	4.76945e-10	5.5793e-11	9.18e-11	8.798e-11	8.6971e-11	5.2258e-11	2.8764e-11	7.2713e-11	1.07251e-10	1.12166e-10	9.9577e-11	3.8533e-11	5.2131e-11	4.2895e-11	5.2912e-11	8.5151e-11	5.3597e-11	4.4155e-11	5.1504e-11	5.8129e-11	5.2454e-11	1.87e-11	4.6164e-11	3.2883e-11	5.4072e-11	5.0913e-11	5.8089e-11	4.3553e-11	5.8759e-11	4.403e-11	3.4278e-11	5.6247e-11	1.9978e-11
2024-05-29T17:51:31.036	3.84164e-09	8.649e-10	6.47103e-10	2.2572e-10	1.4048e-10	7.999e-11	1.02038e-10	3.4227e-10	1.00925e-10	1.13473e-10	8.527e-11	7.4056e-11	8.4883e-11	7.5895e-11	4.2013e-11	5.517e-11	1.48093e-10	7.8904e-11	5.8511e-11	8.3305e-11	7.3504e-11	3.6952e-11	4.0678e-11	8.1722e-11	8.0329e-11	1.61307e-10	1.03877e-10	8.9543e-11	8.513e-11	6.0662e-11	7.2721e-11	4.6976e-11	4.3762e-11	6.9814e-11	3.6418e-11	6.8779e-11	7.8681e-11	3.7399e-11	4.6164e-11	7.1036e-11	1.9117e-11	7.4528e-11	5.8089e-11	6.7471e-11	7.062e-11	8.806e-11	7.405e-11	4.8711e-11	4.4672e-11
2024-05-29T17:51:34.496	3.34713e-09	8.70289e-10	4.84198e-10	2.3822e-10	2.07055e-10	1.40729e-10	1.37309e-10	8.7671e-11	1.2153e-10	1.17839e-10	1.21625e-10	9.9858e-11	6.1047e-11	6.5249e-11	6.9216e-11	4.48489e-10	8.4502e-11	1.12743e-10	6.4912e-11	6.7361e-11	9.1512e-11	6.4002e-11	7.2388e-11	9.8688e-11	4.45682e-10	1.2654e-10	1.0103e-10	6.4479e-11	7.1648e-11	4.6332e-11	8.4586e-11	9.5615e-11	4.7268e-11	4.7693e-11	5.1504e-11	4.8634e-11	4.1468e-11	6.4778e-11	9.4231e-11	6.8452e-11	8.1108e-11	6.0852e-11	6.422e-11	5.1532e-11	5.5399e-11	4.403e-11	4.4253e-11	2.8123e-11	2.8253e-11
2024-05-29T17:51:37.953	3.72056e-09	9.06378e-10	6.54992e-10	2.34716e-10	1.66013e-10	9.8742e-11	4.94506e-10	1.34249e-10	1.05851e-10	1.24098e-10	8.3787e-11	8.6479e-11	8.0373e-11	8.0693e-11	9.9166e-11	9.2866e-11	1.10639e-10	6.0264e-11	5.6216e-11	6.7361e-11	6.9732e-11	5.9583e-11	7.4268e-11	7.0773e-11	7.6757e-11	1.2426e-10	1.25492e-10	6.2133e-11	7.5745e-11	5.808e-11	6.1098e-11	8.5151e-11	9.621e-11	4.7693e-11	5.4628e-11	5.5146e-11	4.5426e-11	4.1814e-11	7.0516e-11	7.5941e-11	3.8235e-11	3.96241e-10	4.3297e-11	5.1532e-11	7.8346e-11	2.7847e-11	2.7988e-11	5.2614e-11	2.8253e-11
2024-05-29T17:51:41.412	3.83638e-09	1.13182e-09	5.01365e-10	1.843e-10	1.45237e-10	1.57098e-10	1.0065e-10	1.84906e-10	9.7067e-11	6.3558e-11	6.5287e-11	7.061e-11	3.861e-11	1.06159e-10	6.3517e-11	1.11484e-10	8.1428e-11	4.8318e-11	8.114e-11	8.4892e-11	5.9261e-11	7.3904e-11	6.6428e-11	1.05502e-10	9.4751e-11	1.01458e-10	9.9577e-11	1.00483e-10	9.1951e-11	5.2535e-11	8.2727e-11	4.6976e-11	2.69767e-10	4.4155e-11	4.0717e-11	6.3677e-11	9.2726e-11	3.7399e-11	0	7.1036e-11	4.6828e-11	3.20847e-10	2.7383e-11	7.7909e-11	5.5399e-11	5.5694e-11	3.9581e-11	5.2614e-11	4.8936e-11
2024-05-29T17:51:44.869	3.92315e-09	1.2958e-09	4.78549e-10	2.8054e-10	2.32594e-10	1.00273e-10	1.6436e-10	9.3522e-11	1.48843e-10	1.05399e-10	5.9247e-11	1.02324e-10	1.05738e-10	1.24603e-10	8.2511e-11	9.8176e-11	1.23697e-10	7.2029e-11	3.975e-11	5.6594e-11	9.1512e-11	1.03202e-10	4.58724e-10	7.8243e-11	1.48875e-10	1.62191e-10	1.11983e-10	5.1698e-11	5.2131e-11	4.2895e-11	6.5993e-11	4.1412e-10	6.1889e-11	6.9814e-11	7.2837e-11	4.5026e-11	9.0853e-11	1.87e-11	5.6539e-11	6.2967e-11	1.9117e-11	6.0852e-11	3.8726e-11	5.1532e-11	6.4961e-11	5.5694e-11	3.4278e-11	6.2886e-11	4.4672e-11
2024-05-29T17:51:48.338	3.44233e-09	1.02597e-09	4.77285e-10	3.08661e-10	5.59491e-10	1.19668e-10	7.502e-11	1.01669e-10	1.03417e-10	8.8469e-11	8.2278e-11	5.6928e-11	1.08062e-10	8.9521e-11	8.6974e-11	5.9591e-11	7.3181e-11	7.7242e-11	3.975e-11	8.6449e-11	7.5319e-11	5.9583e-11	5.9877e-11	8.6679e-11	7.8563e-11	1.25405e-10	1.27794e-10	7.897e-11	9.0294e-11	4.9531e-11	3.54948e-10	4.6976e-11	6.4416e-11	6.4994e-11	4.8177e-11	5.5146e-11	4.5426e-11	8.3628e-11	6.5285e-11	4.03632e-10	7.1531e-11	6.3822e-11	5.123e-11	4.3553e-11	1.9586e-11	7.0996e-11	3.9581e-11	6.2886e-11	3.41968e-10
2024-05-29T17:51:51.796	4.18553e-09	7.10588e-10	4.45188e-10	2.37349e-10	1.75963e-10	1.69236e-10	8.7165e-11	1.48319e-10	1.10558e-10	8.5567e-11	4.4786e-11	1.08243e-10	5.01874e-10	1.04973e-10	7.9396e-11	6.9421e-11	1.30714e-10	6.4424e-11	1.01344e-10	6.9314e-11	8.218e-11	4.62713e-10	4.0678e-11	1.19129e-10	8.8631e-11	1.056e-10	6.3897e-11	4.5593e-11	9.83e-11	4.2895e-11	2.07943e-10	6.4017e-11	3.9949e-11	6.9814e-11	5.4628e-11	8.6219e-11	5.5636e-11	6.202e-11	7.299e-11	2.6849e-11	5.7352e-11	6.9382e-11	5.8089e-11	5.1532e-11	5.5399e-11	5.5694e-11	3.9581e-11	5.6247e-11	7.4751e-11
2024-05-29T17:51:55.245	3.81349e-09	8.02408e-10	4.44509e-10	2.50922e-10	1.57602e-10	1.00273e-10	9.7814e-11	1.57e-10	9.4407e-11	6.3558e-11	7.0813e-11	1.14945e-10	1.05738e-10	9.6261e-11	5.7254e-11	9.2866e-11	8.8913e-11	6.2378e-11	6.691e-11	6.9314e-11	1.1268e-10	6.1833e-11	5.2516e-11	7.2713e-11	6.4871e-11	1.38411e-10	1.37681e-10	8.787e-11	3.8856e-11	6.0662e-11	6.5993e-11	6.6434e-11	3.0944e-11	6.2444e-11	5.1504e-11	4.5026e-11	6.939e-11	4.1814e-11	3.96219e-10	5.3698e-11	7.1531e-11	6.666e-11	7.245e-11	5.8432e-11	6.1938e-11	8.583e-11	4.4253e-11	3.15659e-10	7.4751e-11
2024-05-29T17:51:58.705	3.86784e-09	1.00426e-09	7.78832e-10	2.1635e-10	1.93462e-10	7.197e-11	8.5536e-11	1.12792e-10	1.50544e-10	7.6203e-11	4.4786e-11	8.7909e-11	9.969e-11	7.7527e-11	1.04127e-10	9.0093e-11	6.9609e-11	6.8332e-11	5.3822e-11	4.5305e-10	1.03951e-10	1.12081e-10	6.6428e-11	8.3407e-11	5.8023e-11	1.20759e-10	1.14558e-10	8.9543e-11	4.07899e-10	3.0331e-11	8.8187e-11	8.3279e-11	9.1098e-11	4.4155e-11	4.0717e-11	6.0966e-11	7.6464e-11	7.9336e-11	8.6364e-11	3.797e-11	4.6828e-11	5.0913e-11	7.245e-11	2.7545e-11	6.1938e-11	1.9691e-11	4.4253e-11	6.8888e-11	4.4672e-11
2024-05-29T17:52:02.163	4.06475e-09	9.88167e-10	5.0795e-10	2.63012e-10	2.11927e-10	9.8742e-11	9.9242e-11	1.06756e-10	7.4848e-11	4.05102e-10	7.0813e-11	9.8602e-11	9.0548e-11	4.7476e-11	1.00429e-10	5.517e-11	8.8913e-11	3.9452e-11	4.79483e-10	7.6629e-11	8.6971e-11	6.8136e-11	8.7876e-11	6.6726e-11	8.2057e-11	1.29885e-10	9.3536e-11	6.8931e-11	8.513e-11	6.5523e-11	7.483e-11	6.4017e-11	8.3798e-11	6.9814e-11	1.8209e-11	4.8634e-11	6.939e-11	4.5805e-11	3.7692e-11	5.6956e-11	7.8823e-11	4.3029e-11	2.7383e-11	3.8955e-11	3.3925e-11	3.4105e-11	4.8477e-11	6.5955e-11	7.4751e-11
2024-05-29T17:52:05.621	5.76246e-09	1.05105e-09	4.26472e-10	2.72298e-10	1.6291e-10	1.11769e-10	9.3399e-11	1.39097e-10	1.49696e-10	8.102e-11	1.05033e-10	6.6987e-11	9.0548e-11	6.898e-11	6.5472e-11	1.06837e-10	1.07125e-10	5.8071e-11	5.8511e-11	5.8905e-11	6.9732e-11	6.1833e-11	1.06336e-10	8.9832e-11	8.5407e-11	1.10884e-10	4.10209e-10	5.9696e-11	1.19131e-10	5.2535e-11	5.5775e-11	6.1506e-11	5.6496e-11	5.0986e-11	5.4628e-11	7.3528e-11	6.4243e-11	3.2389e-11	4.6164e-11	5.6956e-11	5.7352e-11	0	6.1231e-11	8.9256e-11	3.62217e-10	5.2097e-11	6.2584e-11	2.8123e-11	7.2032e-11
2024-05-29T17:52:09.090	3.28418e-09	7.5965e-10	5.6162e-10	2.01479e-10	1.36798e-10	1.13123e-10	1.5004e-10	1.15118e-10	8.5935e-11	1.27115e-10	6.5287e-11	8.0508e-11	7.5594e-11	7.9126e-11	8.2511e-11	1.08017e-10	4.88305e-10	8.369e-11	7.0736e-11	8.6449e-11	7.7092e-11	5.9583e-11	5.7528e-11	5.7786e-11	9.7667e-11	1.23104e-10	1.25492e-10	7.7067e-11	6.5019e-11	6.5523e-11	6.8309e-11	6.6434e-11	4.3762e-11	5.4078e-11	6.3079e-11	8.0125e-11	7.6464e-11	3.2389e-11	4.6164e-11	3.2883e-11	7.4041e-11	5.4428e-11	3.3538e-11	4.3553e-11	4.3797e-11	5.9072e-11	3.4278e-11	3.9773e-11	7.2032e-11
2024-05-29T17:52:12.543	4.63438e-09	1.06117e-09	4.00156e-10	1.83172e-10	1.59746e-10	1.35207e-10	4.24708e-10	1.06756e-10	1.54715e-10	7.7842e-11	8.3787e-11	9.604e-11	7.722e-11	1.13015e-10	6.737e-11	4.82017e-10	1.15156e-10	6.2378e-11	5.6216e-11	1.20055e-10	8.6971e-11	4.9576e-11	6.6428e-11	1.17955e-10	4.70487e-10	1.25405e-10	7.4438e-11	3.8533e-11	6.7301e-11	6.0662e-11	6.3593e-11	7.1021e-11	8.3798e-11	5.9786e-11	9.2849e-11	4.8634e-11	5.5636e-11	3.7399e-11	9.0383e-11	7.8278e-11	8.1108e-11	4.3029e-11	2.7383e-11	4.3553e-11	8.3098e-11	7.0996e-11	3.4278e-11	7.1701e-11	5.6506e-11
2024-05-29T17:52:16.000	3.97938e-09	7.99907e-10	5.07355e-10	2.42528e-10	1.54329e-10	1.42878e-10	1.02038e-10	1.16263e-10	1.1396e-10	8.5567e-11	5.2517e-11	7.5721e-11	9.5879e-11	9.2276e-11	7.9396e-11	9.5558e-11	1.22662e-10	5.0932e-11	1.2035e-10	6.535e-11	4.6488e-11	1.04516e-10	5.9877e-11	2.77132e-10	8.2057e-11	1.34205e-10	1.05271e-10	7.3112e-11	9.0294e-11	6.3139e-11	5.5775e-11	8.5151e-11	4.34692e-10	6.2444e-11	6.0393e-11	6.6277e-11	6.1508e-11	9.3499e-11	4.9862e-11	4.2452e-11	5.7352e-11	5.4428e-11	9.2862e-11	7.0226e-11	3.9173e-11	5.9072e-11	3.9581e-11	8.8934e-11	3.9956e-11
2024-05-29T17:52:19.456	4.01475e-09	7.64907e-10	6.00612e-10	2.26636e-10	1.66013e-10	1.13123e-10	1.60023e-10	1.44701e-10	1.04641e-10	6.3558e-11	4.7503e-11	1.01098e-10	8.6334e-11	4.187e-11	4.69715e-10	9.0093e-11	7.1417e-11	5.3418e-11	5.8511e-11	9.8024e-11	9.5838e-11	8.4264e-11	7.7893e-11	6.6726e-11	6.6999e-11	8.9477e-11	1.24324e-10	6.2133e-11	7.3725e-11	4.6332e-11	6.8309e-11	7.5329e-11	7.5798e-11	4.7693e-11	3.1539e-11	7.5791e-11	5.5636e-11	1.22622e-10	5.3305e-11	6.0037e-11	8.3331e-11	5.0913e-11	6.1231e-11	4.7709e-11	3.9173e-11	5.2097e-11	5.9372e-11	4.8711e-11	5.9934e-11
2024-05-29T17:52:22.914	4.54045e-09	8.98979e-10	4.36277e-10	2.82012e-10	1.46398e-10	1.59026e-10	1.4234e-10	8.917e-11	7.9788e-11	1.15677e-10	9.3677e-11	1.2827e-10	7.0492e-11	5.9212e-11	4.74522e-10	1.08017e-10	1.08309e-10	6.0264e-11	1.12431e-10	6.9314e-11	9.5838e-11	5.2258e-11	7.4268e-11	4.59572e-10	6.6999e-11	1.056e-10	1.06647e-10	9.7483e-11	4.5975e-11	8.579e-11	8.8187e-11	3.551e-11	6.1889e-11	7.6479e-11	6.8133e-11	7.3528e-11	6.6866e-11	4.9475e-11	4.9862e-11	5.023e-11	5.7352e-11	5.0913e-11	6.7075e-11	7.7909e-11	5.1821e-11	3.9382e-11	1.9791e-11	7.7019e-11	8.2371e-11
2024-05-29T17:52:26.372	5.22957e-09	7.80466e-10	4.68984e-10	2.90692e-10	1.99523e-10	4.5283e-10	1.4234e-10	1.28185e-10	8.1368e-11	6.5514e-11	9.3677e-11	8.6479e-11	9.0548e-11	6.129e-11	7.1014e-11	9.149e-11	1.10639e-10	1.08043e-10	5.8511e-11	5.1663e-11	7.1643e-11	6.4002e-11	8.9431e-11	1.04175e-10	9.9093e-11	1.25405e-10	9.3536e-11	2.4371e-11	5.2131e-11	6.0662e-11	8.4586e-11	3.82872e-10	7.3662e-11	8.2606e-11	6.3079e-11	7.7988e-11	2.6227e-11	6.202e-11	5.6539e-11	4.6504e-11	9.5587e-11	4.7136e-11	6.1231e-11	2.7545e-11	2.7699e-11	7.0996e-11	7.6648e-11	7.9545e-11	4.8936e-11
2024-05-29T17:52:29.836	3.61403e-09	8.31834e-10	5.49657e-10	2.0555e-10	4.84534e-10	1.25872e-10	8.5536e-11	1.40047e-10	1.02179e-10	9.1278e-11	6.902e-11	7.4056e-11	5.4603e-11	7.5895e-11	9.5276e-11	4.7779e-11	7.6586e-11	6.2378e-11	6.072e-11	5.6594e-11	9.1512e-11	7.3904e-11	5.5079e-11	8.0001e-11	4.4316e-11	1.17153e-10	1.10673e-10	6.8931e-11	3.8856e-11	3.5023e-11	3.92409e-10	5.3266e-11	7.9898e-11	7.2105e-11	5.1504e-11	8.8157e-11	4.9066e-11	6.4778e-11	6.7951e-11	1.0046e-10	5.7352e-11	6.3822e-11	3.3538e-11	5.1532e-11	5.1821e-11	5.5694e-11	5.5976e-11	6.8888e-11	3.51749e-10
2024-05-29T17:52:33.298	3.34914e-09	1.23077e-09	4.93469e-10	6.49285e-10	2.28908e-10	1.46042e-10	1.07412e-10	1.41927e-10	1.00925e-10	6.3558e-11	7.7572e-11	1.05915e-10	1.251e-10	6.5249e-11	7.9396e-11	9.5558e-11	7.8233e-11	5.8071e-11	9.18e-11	6.7361e-11	4.54599e-10	4.6741e-11	9.096e-11	5.2751e-11	9.02e-11	1.01458e-10	1.05271e-10	4.8741e-11	5.2131e-11	4.0353e-10	5.8497e-11	6.1506e-11	6.1889e-11	3.1222e-11	4.0717e-11	3.1839e-11	4.5426e-11	4.5805e-11	7.299e-11	1.07397e-10	5.4072e-11	3.8486e-11	3.8726e-11	4.3553e-11	3.9173e-11	3.9382e-11	3.4278e-11	6.8888e-11	7.2032e-11
2024-05-29T17:52:36.748	3.7494e-09	1.02206e-09	3.43261e-10	2.83477e-10	1.88112e-10	1.32936e-10	6.9165e-11	1.21829e-10	1.05851e-10	6.3558e-11	2.97078e-10	5.2366e-11	7.0492e-11	6.7141e-11	5.5007e-11	1.06837e-10	7.1417e-11	7.3808e-11	4.8684e-11	8.0037e-11	1.09024e-10	9.3482e-11	7.6102e-11	1.00088e-10	6.6999e-11	1.21937e-10	1.21956e-10	7.3112e-11	5.7633e-11	3.5023e-11	5.8497e-11	8.5151e-11	1.19847e-10	3.1222e-11	5.4628e-11	8.0125e-11	4.07995e-10	8.3628e-11	8.2149e-11	4.6504e-11	2.7036e-11	6.0852e-11	5.123e-11	5.8432e-11	0	3.56616e-10	6.2584e-11	6.5955e-11	6.3176e-11
2024-05-29T17:52:40.208	3.68388e-09	8.53238e-10	5.15624e-10	2.72298e-10	2.32594e-10	1.03267e-10	1.39343e-10	1.33258e-10	1.12838e-10	9.6652e-11	7.5939e-11	1.01098e-10	8.9166e-11	6.7141e-11	8.5512e-11	1.01978e-10	9.8441e-11	7.7242e-11	7.9501e-11	7.8351e-11	9.4418e-11	7.5729e-11	7.6102e-11	8.1722e-11	7.6757e-11	8.9477e-11	1.08006e-10	4.64003e-10	3.0098e-11	4.6332e-11	7.8877e-11	7.1021e-11	6.4416e-11	4.7693e-11	3.1539e-11	7.1193e-11	1.8545e-11	8.151e-11	2.6653e-11	6.2967e-11	8.5496e-11	6.666e-11	6.1231e-11	4.3553e-11	6.4961e-11	6.5307e-11	7.1356e-11	3.9773e-11	6.9206e-11
2024-05-29T17:52:43.665	4.41261e-09	1.04084e-09	6.48036e-10	3.23694e-10	1.48716e-10	1.41808e-10	1.07412e-10	9.3522e-11	1.03417e-10	1.90673e-10	1.01389e-10	8.3547e-11	9.0548e-11	7.0772e-11	7.1014e-11	9.2866e-11	1.23697e-10	8.2125e-11	7.6116e-11	1.23345e-10	1.19656e-10	6.6102e-11	5.5079e-11	9.8688e-11	7.6757e-11	1.33141e-10	1.31172e-10	5.1698e-11	4.915e-11	5.808e-11	9.1647e-11	7.1021e-11	5.6496e-11	4.7693e-11	6.5654e-11	3.55015e-10	3.2121e-11	6.7423e-11	3.2643e-11	4.6504e-11	3.3112e-11	4.3029e-11	4.7429e-11	6.1593e-11	3.54726e-10	7.3676e-11	5.5976e-11	8.6682e-11	3.9956e-11
2024-05-29T17:52:47.129	4.89302e-09	9.7181e-10	6.71392e-10	2.86385e-10	1.34288e-10	1.30624e-10	1.68586e-10	1.25049e-10	4.61394e-10	5.5043e-11	1.0622e-10	8.3547e-11	1.12566e-10	5.9212e-11	7.448e-11	7.2984e-11	9.9728e-11	4.50108e-10	4.59e-11	1.29663e-10	8.8511e-11	1.00521e-10	7.7893e-11	6.6726e-11	1.07251e-10	1.20759e-10	8.7077e-11	5.9696e-11	6.9508e-11	5.2535e-11	6.1098e-11	3.0753e-11	7.1463e-11	5.0986e-11	7.2837e-11	4.8634e-11	4.1468e-11	6.4778e-11	4.6164e-11	5.023e-11	4.6828e-11	7.2001e-11	5.123e-11	6.7471e-11	5.5399e-11	1.9691e-11	5.9372e-11	3.9773e-11	4.4672e-11
2024-05-29T17:52:50.582	3.41878e-09	9.96245e-10	4.13523e-10	1.92005e-10	1.50986e-10	1.03267e-10	1.4234e-10	1.00357e-10	1.25646e-10	5.729e-11	3.1669e-11	8.7909e-11	8.4883e-11	5.482e-11	5.0215e-11	1.20241e-10	9.7138e-11	5.0932e-11	6.4912e-11	6.3274e-11	5.9261e-11	6.6102e-11	5.7528e-11	9.1368e-11	9.3259e-11	1.45462e-10	6.8309e-11	7.3112e-11	9.3578e-11	3.9157e-11	7.2721e-11	4.6976e-11	5.9254e-11	7.2105e-11	4.11223e-10	6.6277e-11	8.6985e-11	4.1814e-11	9.6097e-11	5.023e-11	4.6828e-11	6.9382e-11	1.09534e-10	3.9726e-10	6.4961e-11	7.8763e-11	4.4253e-11	7.4408e-11	2.8253e-11
2024-05-29T17:52:54.048	3.78514e-09	1.06369e-09	4.83573e-10	2.59843e-10	2.07055e-10	1.23428e-10	1.19797e-10	7.9756e-11	5.03087e-10	8.2564e-11	1.07394e-10	1.02324e-10	1.11457e-10	9.3623e-11	5.2666e-11	8.5766e-11	9.4476e-11	9.111e-11	1.00036e-10	8.9484e-11	4.6488e-11	7.3904e-11	9.096e-11	7.0773e-11	8.0329e-11	1.38411e-10	1.33375e-10	7.897e-11	8.6885e-11	6.5523e-11	7.483e-11	6.1506e-11	5.6496e-11	5.4078e-11	3.94767e-10	3.1839e-11	7.8681e-11	7.2423e-11	4.2141e-11	4.6504e-11	4.6828e-11	5.0913e-11	6.422e-11	3.71603e-10	5.5399e-11	5.5694e-11	3.4278e-11	3.4444e-11	7.4751e-11
2024-05-29T17:52:57.500	3.93856e-09	1.3319e-09	6.7319e-10	2.64582e-10	2.05405e-10	1.23428e-10	1.20966e-10	7.2807e-11	1.43619e-10	1.01742e-10	8.3787e-11	7.7349e-11	7.5594e-11	8.6678e-11	8.8412e-11	9.0093e-11	4.26414e-10	5.0932e-11	8.2747e-11	4.3225e-11	7.3504e-11	7.0112e-11	7.6102e-11	8.5059e-11	9.7667e-11	1.50296e-10	1.10673e-10	4.5593e-11	8.8606e-11	6.0662e-11	4.3203e-11	3.551e-11	6.6847e-11	6.4994e-11	4.4603e-11	8.2207e-11	6.1508e-11	6.7423e-11	4.6164e-11	7.5941e-11	4.6828e-11	6.0852e-11	5.123e-11	6.1593e-11	7.062e-11	7.8763e-11	5.9372e-11	1.9886e-11	4.4672e-11
2024-05-29T17:53:00.957	4.19195e-09	7.25471e-10	4.51924e-10	3.07316e-10	1.46398e-10	1.62812e-10	9.4893e-11	8.4594e-11	9.4407e-11	1.1458e-10	8.2278e-11	1.2827e-10	1.26099e-10	6.3301e-11	8.8412e-11	4.3412e-10	1.23697e-10	1.11586e-10	9.4625e-11	4.6209e-11	7.3504e-11	8.4264e-11	7.6102e-11	7.4601e-11	4.40299e-10	9.4149e-11	1.09348e-10	6.6741e-11	9.6752e-11	5.808e-11	6.1098e-11	1.01996e-10	1.7866e-11	4.4155e-11	4.0717e-11	1.8382e-11	4.5426e-11	2.6445e-11	4.6164e-11	4.2452e-11	4.2748e-11	7.9342e-11	6.7075e-11	6.7471e-11	2.7699e-11	2.7847e-11	4.4253e-11	3.9773e-11	6.3176e-11
2024-05-29T17:53:04.417	3.8748e-09	9.90867e-10	5.11506e-10	1.97325e-10	1.89912e-10	1.40729e-10	1.40349e-10	8.3013e-11	1.33511e-10	8.8469e-11	9.2329e-11	8.2042e-11	8.1904e-11	2.84414e-10	9.5276e-11	1.15945e-10	5.5319e-11	6.0264e-11	7.6116e-11	1.0461e-10	9.7237e-11	8.4264e-11	4.52672e-10	7.6444e-11	1.20784e-10	1.25405e-10	1.06647e-10	7.5115e-11	9.3578e-11	5.5377e-11	4.9886e-11	4.27234e-10	5.6496e-11	5.9786e-11	5.1504e-11	4.5026e-11	4.5426e-11	6.202e-11	1.0149e-10	3.2883e-11	3.3112e-11	7.6973e-11	7.9836e-11	7.2877e-11	7.8346e-11	6.8211e-11	5.5976e-11	2.8123e-11	7.7374e-11
2024-05-29T17:53:07.878	4.39886e-09	8.81725e-10	4.51924e-10	2.72298e-10	4.86636e-10	1.31785e-10	1.19797e-10	1.0799e-10	1.50544e-10	1.08932e-10	7.0813e-11	9.2064e-11	1.19004e-10	1.0964e-10	1.21971e-10	9.946e-11	9.9728e-11	5.0932e-11	7.6116e-11	7.8351e-11	6.5744e-11	6.6102e-11	6.8472e-11	7.2713e-11	7.1063e-11	9.7138e-11	9.5082e-11	7.1052e-11	4.915e-11	3.9157e-11	6.3593e-11	5.0219e-11	5.9254e-11	4.4155e-11	7.5079e-11	3.6764e-11	5.2454e-11	6.7423e-11	4.2141e-11	3.61219e-10	6.0454e-11	6.9382e-11	5.123e-11	5.1532e-11	1.9586e-11	2.7847e-11	7.6648e-11	3.9773e-11	3.54011e-10
2024-05-29T17:53:11.333	3.80112e-09	1.01484e-09	4.7918e-10	2.19203e-10	1.49855e-10	2.08004e-10	6.71e-11	1.11611e-10	9.167e-11	8.8469e-11	6.5287e-11	6.6987e-11	1.04556e-10	7.7527e-11	6.737e-11	1.05643e-10	9.3116e-11	7.5544e-11	6.285e-11	8.9484e-11	7.8825e-11	4.5287e-10	7.2388e-11	1.22583e-10	6.2672e-11	1.45462e-10	9.3536e-11	5.9696e-11	6.5019e-11	4.2895e-11	4.19609e-10	3.9702e-11	9.621e-11	3.6052e-11	4.8177e-11	4.8634e-11	3.709e-11	4.5805e-11	4.6164e-11	3.797e-11	6.3405e-11	5.7729e-11	6.1231e-11	4.3553e-11	6.1938e-11	4.403e-11	3.4278e-11	8.6682e-11	6.626e-11
2024-05-29T17:53:14.791	4.40956e-09	1.24104e-09	4.16436e-10	3.50158e-10	5.71223e-10	9.8742e-11	9.3399e-11	1.21829e-10	1.094e-10	1.15677e-10	1.16358e-10	8.5026e-11	7.2232e-11	8.0693e-11	8.0969e-11	6.757e-11	7.8233e-11	3.2212e-11	0	7.1213e-11	1.18522e-10	1.0187e-10	8.6292e-11	1.4056e-10	6.9061e-11	1.18367e-10	1.14558e-10	6.4479e-11	6.7301e-11	7.6332e-11	3.30438e-10	7.9404e-11	1.01064e-10	2.5493e-11	6.5654e-11	6.0966e-11	4.1468e-11	4.5805e-11	4.9862e-11	3.40148e-10	5.058e-11	5.7729e-11	4.7429e-11	6.7471e-11	5.1821e-11	4.8232e-11	3.9581e-11	7.1701e-11	3.31298e-10
2024-05-29T17:53:18.250	4.06971e-09	8.89268e-10	4.51255e-10	2.12486e-10	4.19821e-10	9.8742e-11	1.2885e-10	1.59512e-10	1.32554e-10	1.16763e-10	4.4786e-11	6.115e-11	1.10337e-10	7.9126e-11	7.1014e-11	1.08017e-10	3.9117e-11	7.2029e-11	8.4323e-11	7.3063e-11	1.09024e-10	4.6741e-11	5.7528e-11	6.0146e-11	1.03252e-10	1.34205e-10	6.8309e-11	5.4494e-11	9.0294e-11	5.5377e-11	4.09478e-10	3.551e-11	1.07194e-10	4.0308e-11	4.0717e-11	6.6277e-11	3.2121e-11	3.7399e-11	5.3305e-11	7.5941e-11	7.4041e-11	3.333e-11	5.8089e-11	6.4599e-11	4.7977e-11	1.9691e-11	7.1356e-11	5.9659e-11	2.67287e-10
2024-05-29T17:53:21.709	3.7887e-09	9.8546e-10	3.92478e-10	2.01479e-10	2.20581e-10	1.2827e-10	1.53745e-10	9.9028e-11	9.9655e-11	6.3558e-11	8.074e-11	2.99989e-10	1.03361e-10	9.2276e-11	7.7792e-11	1.23364e-10	1.10639e-10	8.5226e-11	5.1318e-11	1.00711e-10	4.34546e-10	5.2258e-11	9.3943e-11	8.9832e-11	8.8631e-11	1.6568e-10	1.40823e-10	6.8931e-11	1.22875e-10	7.2203e-11	6.1098e-11	5.0219e-11	7.1463e-11	3.1222e-11	8.3445e-11	6.6277e-11	5.2454e-11	7.9336e-11	7.9958e-11	6.2967e-11	5.7352e-11	7.6973e-11	5.4767e-11	8.9256e-11	3.3925e-11	6.2268e-11	5.5976e-11	3.4444e-11	6.626e-11
2024-05-29T17:53:25.167	3.93e-09	8.81725e-10	4.51255e-10	2.0555e-10	1.85379e-10	1.7629e-10	8.045e-11	1.41927e-10	1.07047e-10	9.4003e-11	8.074e-11	1.16024e-10	9.5879e-11	8.223e-11	7.9396e-11	1.06837e-10	9.0336e-11	4.2613e-11	4.8684e-11	6.7361e-11	7.7092e-11	8.5869e-11	5.2516e-11	1.09387e-10	7.8563e-11	1.27665e-10	8.8736e-11	1.18141e-10	3.32443e-10	3.9157e-11	7.2721e-11	7.5329e-11	7.7875e-11	5.9786e-11	4.0717e-11	4.5026e-11	4.9066e-11	4.16883e-10	6.2506e-11	6.8452e-11	3.8235e-11	6.9382e-11	4.7429e-11	6.7471e-11	6.1938e-11	6.2268e-11	3.65994e-10	4.8711e-11	4.8936e-11
2024-05-29T17:53:28.626	4.3527e-09	1.05739e-09	6.86962e-10	2.66143e-10	2.2965e-10	1.88e-10	1.48152e-10	1.17398e-10	9.3048e-11	5.0247e-11	9.8885e-11	1.24317e-10	8.4883e-11	4.7476e-11	6.9216e-11	1.01978e-10	1.04718e-10	5.5793e-11	5.3822e-11	4.33173e-10	8.6971e-11	1.03202e-10	9.3943e-11	9.8688e-11	6.6999e-11	1.29885e-10	5.9157e-11	9.1187e-11	4.16688e-10	5.2535e-11	5.2912e-11	4.6976e-11	7.5798e-11	4.4155e-11	5.4628e-11	5.1992e-11	5.5636e-11	5.6099e-11	5.6539e-11	4.2452e-11	5.4072e-11	6.3822e-11	2.7383e-11	7.2877e-11	7.8346e-11	3.4105e-11	7.1356e-11	5.2614e-11	4.8936e-11
2024-05-29T17:53:32.086	3.64917e-09	1.10375e-09	4.60533e-10	3.59497e-10	1.67035e-10	1.67426e-10	8.8765e-11	1.45614e-10	8.8848e-11	8.9884e-11	4.53703e-10	8.0508e-11	1.251e-10	4.7476e-11	6.5472e-11	8.8674e-11	6.9609e-11	7.5544e-11	6.072e-11	8.1687e-11	1.24089e-10	5.2258e-11	4.9821e-11	6.2416e-11	9.02e-11	1.47415e-10	8.3661e-11	1.06229e-10	6.0196e-11	8.2137e-11	5.2912e-11	3.0753e-11	6.4416e-11	6.9814e-11	8.9207e-11	5.5146e-11	3.96018e-10	6.202e-11	7.0516e-11	6.2967e-11	9.1684e-11	6.9382e-11	5.123e-11	5.8432e-11	4.3797e-11	8.583e-11	6.5638e-11	6.5955e-11	6.9206e-11
2024-05-29T17:53:35.544	3.22418e-09	1.02271e-09	4.5459e-10	2.4592e-10	1.72052e-10	1.64673e-10	9.7814e-11	8.3013e-11	9.5746e-11	8.8469e-11	6.3337e-11	1.02324e-10	8.7761e-11	9.2276e-11	8.6974e-11	9.2866e-11	9.1737e-11	8.6734e-11	6.285e-11	6.7361e-11	1.2078e-10	4.0479e-11	3.3214e-11	6.8779e-11	9.7667e-11	1.33141e-10	1.0103e-10	8.2645e-11	9.0294e-11	9.4303e-11	3.9439e-11	1.00439e-10	5.6496e-11	4.7693e-11	5.4628e-11	4.1103e-11	3.68112e-10	5.2891e-11	6.5285e-11	2.6849e-11	6.8929e-11	1.9243e-11	3.8726e-11	7.0226e-11	6.1938e-11	3.53339e-10	3.4278e-11	5.2614e-11	5.9934e-11
2024-05-29T17:53:39.001	4.20958e-09	9.24617e-10	4.29296e-10	2.52568e-10	2.73597e-10	1.01781e-10	8.8765e-11	1.10417e-10	1.17264e-10	8.5567e-11	4.4786e-11	9.9858e-11	7.722e-11	7.4227e-11	5.2666e-11	9.2866e-11	1.05928e-10	5.5793e-11	1.00036e-10	8.3305e-11	1.73165e-10	7.9253e-11	7.6102e-11	5.2751e-11	7.3011e-11	1.52186e-10	1.20754e-10	2.75722e-10	9.6752e-11	1.14832e-10	4.3203e-11	8.5151e-11	4.7268e-11	7.4324e-11	6.3079e-11	8.0125e-11	3.62463e-10	4.9475e-11	5.3305e-11	5.3698e-11	7.4041e-11	3.8486e-11	6.9814e-11	2.7545e-11	7.062e-11	3.48366e-10	2.7988e-11	4.4467e-11	2.8253e-11
2024-05-29T17:53:42.468	3.63442e-09	8.5402e-10	6.11084e-10	2.30262e-10	2.66669e-10	1.03267e-10	9.4893e-11	1.31254e-10	5.5279e-11	4.99931e-10	7.2562e-11	1.19203e-10	1.00929e-10	8.0693e-11	5.2666e-11	1.25399e-10	9.5816e-11	7.8904e-11	2.90749e-10	4.6209e-11	9.9977e-11	3.6952e-11	5.7528e-11	7.4601e-11	9.622e-11	1.00039e-10	1.09348e-10	5.4494e-11	7.7713e-11	6.5523e-11	4.3203e-11	3.551e-11	9.1098e-11	6.4994e-11	6.8133e-11	8.2207e-11	6.4243e-11	4.5805e-11	4.9862e-11	6.0037e-11	4.2748e-11	4.3029e-11	3.3538e-11	5.509e-11	4.3797e-11	4.8232e-11	3.9581e-11	3.9773e-11	5.2857e-11
2024-05-29T17:53:45.921	3.99963e-09	9.10055e-10	5.88929e-10	3.06641e-10	1.41685e-10	1.24656e-10	1.39343e-10	1.88456e-10	4.80852e-10	6.5514e-11	6.7179e-11	7.8944e-11	6.8707e-11	7.7527e-11	8.6974e-11	8.5766e-11	8.4502e-11	8.369e-11	5.8511e-11	4.3225e-11	9.9977e-11	7.2033e-11	4.6971e-11	9.7268e-11	8.5407e-11	1.12166e-10	9.8101e-11	9.7483e-11	5.2131e-11	5.808e-11	6.8309e-11	5.6147e-11	9.4537e-11	4.4155e-11	4.12028e-10	1.8382e-11	6.939e-11	7.2423e-11	3.7692e-11	2.6849e-11	7.647e-11	5.4428e-11	2.7383e-11	1.45755e-10	7.3286e-11	7.6262e-11	3.9581e-11	6.2886e-11	4.8936e-11
2024-05-29T17:53:49.377	3.60658e-09	7.24549e-10	7.03046e-10	2.52568e-10	1.39263e-10	1.80559e-10	1.06094e-10	9.3522e-11	1.28655e-10	1.28105e-10	7.427e-11	1.10522e-10	1.13664e-10	6.129e-11	6.9216e-11	4.35287e-10	9.3116e-11	7.8904e-11	3.6287e-11	9.2418e-11	7.1643e-11	7.0112e-11	5.7528e-11	8.3407e-11	4.2407e-10	1.45462e-10	7.4438e-11	6.4479e-11	7.3725e-11	4.9531e-11	8.8187e-11	4.6976e-11	6.6847e-11	3.6052e-11	4.8177e-11	8.8157e-11	5.5636e-11	5.9134e-11	3.7692e-11	5.023e-11	6.6225e-11	4.7136e-11	5.123e-11	4.3553e-11	7.5857e-11	3.9382e-11	5.5976e-11	2.8123e-11	8.2371e-11
2024-05-29T17:53:52.835	4.35888e-09	8.70289e-10	4.91628e-10	1.99413e-10	1.85379e-10	1.32936e-10	9.188e-11	1.20737e-10	7.1365e-11	7.2814e-11	1.26675e-10	8.0508e-11	5.6832e-11	4.476e-11	3.1679e-10	7.4701e-11	1.24722e-10	6.2378e-11	7.2574e-11	9.5263e-11	1.06518e-10	9.201e-11	5.7528e-11	4.28553e-10	6.4871e-11	1.98643e-10	1.19541e-10	7.897e-11	9.3578e-11	3.5023e-11	7.2721e-11	6.4017e-11	4.00288e-10	6.4994e-11	2.5752e-11	4.8634e-11	4.1468e-11	6.9968e-11	6.2506e-11	4.6504e-11	6.6225e-11	2.7214e-11	4.7429e-11	7.2877e-11	5.8759e-11	3.9382e-11	5.2361e-11	3.9773e-11	5.9934e-11
2024-05-29T17:53:56.293	4.04482e-09	1.01813e-09	5.65907e-10	2.3116e-10	1.61862e-10	5.62647e-10	9.7814e-11	1.26104e-10	1.55536e-10	8.2564e-11	7.427e-11	9.2064e-11	8.9166e-11	5.0044e-11	8.5512e-11	1.03214e-10	8.1428e-11	6.4424e-11	7.6116e-11	1.16672e-10	7.1643e-11	4.6741e-11	4.53281e-10	4.4135e-11	8.5407e-11	7.9313e-11	1.46904e-10	3.4465e-11	6.5019e-11	4.2895e-11	6.1098e-11	4.33097e-10	3.5731e-11	7.6479e-11	6.8133e-11	4.5026e-11	9.6364e-11	5.9134e-11	4.6164e-11	7.5941e-11	6.3405e-11	3.333e-11	8.4401e-11	2.7545e-11	4.3797e-11	5.2097e-11	5.5976e-11	6.8888e-11	6.626e-11
2024-05-29T17:53:59.757	3.72056e-09	7.01125e-10	5.09138e-10	2.42528e-10	1.29121e-10	5.64809e-10	1.50975e-10	9.4929e-11	7.653e-11	1.16763e-10	6.3337e-11	3.5305e-11	1.09205e-10	6.7141e-11	5.2666e-11	1.11484e-10	1.35504e-10	9.5285e-11	5.8511e-11	7.8351e-11	1.1622e-10	9.201e-11	4.9821e-11	6.4606e-11	5.5553e-11	1.46441e-10	1.13278e-10	5.1698e-11	8.1506e-11	8.0249e-11	7.483e-11	3.82872e-10	6.1889e-11	9.0131e-11	3.6418e-11	6.6277e-11	5.8645e-11	4.1814e-11	4.9862e-11	6.8452e-11	4.6828e-11	4.3029e-11	0	5.8432e-11	5.8759e-11	3.9382e-11	3.9581e-11	5.2614e-11	6.3176e-11
2024-05-29T17:54:03.220	4.60816e-09	1.06369e-09	3.76825e-10	1.55e-10	4.69556e-10	1.24656e-10	1.19797e-10	7.4605e-11	1.17264e-10	7.9447e-11	1.03833e-10	1.09389e-10	8.6334e-11	8.8111e-11	8.0969e-11	4.7779e-11	8.4502e-11	5.3418e-11	5.8511e-11	1.10806e-10	1.09024e-10	7.3904e-11	5.7528e-11	7.0773e-11	1.05935e-10	1.08274e-10	1.17076e-10	8.787e-11	9.0294e-11	4.6332e-11	3.86418e-10	6.8765e-11	9.7855e-11	5.4078e-11	6.8133e-11	3.1839e-11	4.5426e-11	2.6445e-11	2.6653e-11	4.6504e-11	7.4041e-11	4.3029e-11	7.245e-11	8.49e-11	6.7849e-11	2.7847e-11	6.5638e-11	4.4467e-11	3.62918e-10
2024-05-29T17:54:06.670	3.54257e-09	8.52454e-10	4.72833e-10	5.04315e-10	1.10675e-10	1.10397e-10	9.9242e-11	1.10417e-10	1.5389e-10	4.2039e-11	7.427e-11	9.7329e-11	9.5879e-11	6.5249e-11	7.9396e-11	8.5766e-11	7.8233e-11	5.8071e-11	7.2574e-11	5.6594e-11	9.5838e-11	5.9583e-11	6.8472e-11	6.4606e-11	8.3749e-11	1.67397e-10	1.15823e-10	6.8931e-11	9.3578e-11	4.37793e-10	5.8497e-11	1.46414e-10	5.0532e-11	5.4078e-11	7.2837e-11	6.3677e-11	4.5426e-11	4.5805e-11	3.92617e-10	7.3529e-11	9.9337e-11	5.7729e-11	4.7429e-11	3.8955e-11	6.1938e-11	4.403e-11	3.9581e-11	3.62346e-10	3.4603e-11
2024-05-29T17:54:10.129	4.32788e-09	7.20853e-10	4.24341e-10	2.52568e-10	1.52109e-10	8.5513e-11	9.0336e-11	1.02964e-10	9.167e-11	9.6652e-11	6.1326e-11	3.91552e-10	1.12566e-10	9.0909e-11	8.6974e-11	9.4221e-11	9.0336e-11	4.8318e-11	7.2574e-11	7.1213e-11	8.3808e-11	5.4809e-11	5.5079e-11	1.04175e-10	8.2057e-11	1.41476e-10	9.8101e-11	3.8533e-11	9.0294e-11	8.579e-11	6.1098e-11	6.1506e-11	7.1463e-11	8.0615e-11	4.8177e-11	4.1103e-11	5.2454e-11	3.7586e-10	2.6653e-11	1.0046e-10	4.2748e-11	4.7136e-11	6.1231e-11	9.9315e-11	3.3925e-11	4.403e-11	3.25795e-10	4.8711e-11	4.8936e-11
2024-05-29T17:54:13.595	4.95591e-09	7.32799e-10	5.83259e-10	2.66143e-10	2.6539e-10	1.71027e-10	1.63502e-10	1.17398e-10	1.03417e-10	9.9229e-11	1.1308e-10	1.12755e-10	9.0548e-11	7.252e-11	6.3517e-11	1.10341e-10	9.8441e-11	5.5793e-11	6.4912e-11	8.6449e-11	1.1622e-10	7.3904e-11	6.8472e-11	8.1722e-11	1.14831e-10	1.56813e-10	1.33375e-10	7.897e-11	5.4951e-11	7.2203e-11	6.1098e-11	7.1021e-11	6.4416e-11	5.7004e-11	1.01385e-10	7.7988e-11	4.05882e-10	6.9968e-11	6.2506e-11	4.2452e-11	8.5496e-11	4.7136e-11	7.4992e-11	0	5.5399e-11	3.22352e-10	2.7988e-11	5.2614e-11	4.8936e-11
2024-05-29T17:54:17.045	4.04482e-09	9.8546e-10	5.34611e-10	3.45992e-10	1.74018e-10	1.56125e-10	7.6873e-11	9.4929e-11	1.00925e-10	5.9453e-11	1.24675e-10	8.7909e-11	1.19004e-10	6.129e-11	6.9216e-11	5.9591e-11	6.1848e-11	6.0264e-11	3.2456e-11	9.0963e-11	1.15052e-10	6.6102e-11	4.9821e-11	6.4606e-11	7.1063e-11	1.48381e-10	4.69236e-10	5.4494e-11	9.5178e-11	5.2535e-11	3.5275e-11	4.3491e-11	3.5731e-11	7.2105e-11	6.5654e-11	6.3677e-11	2.6227e-11	4.9475e-11	5.6539e-11	5.6956e-11	1.9117e-11	3.8486e-11	4.7429e-11	6.4599e-11	3.21838e-10	4.8232e-11	5.5976e-11	2.8123e-11	7.4751e-11
2024-05-29T17:54:20.503	3.99963e-09	1.39652e-09	4.90398e-10	2.35597e-10	1.63951e-10	1.19668e-10	8.045e-11	1.19634e-10	7.3127e-11	1.41228e-10	9.2329e-11	1.29238e-10	9.8436e-11	6.5249e-11	5.5007e-11	1.37003e-10	5.13259e-10	5.3418e-11	9.3223e-11	8.3305e-11	9.1512e-11	7.3904e-11	5.7528e-11	5.2751e-11	9.7667e-11	1.49342e-10	1.25492e-10	7.7067e-11	5.2131e-11	5.5377e-11	5.2912e-11	7.9404e-11	6.4416e-11	7.6479e-11	8.3445e-11	4.5026e-11	1.03255e-10	3.2389e-11	8.6364e-11	5.6956e-11	4.6828e-11	6.9382e-11	5.4767e-11	5.1532e-11	3.3925e-11	5.2097e-11	5.5976e-11	6.5955e-11	4.8936e-11
2024-05-29T17:54:23.962	4.92046e-09	8.16436e-10	4.1571e-10	3.07989e-10	1.54329e-10	1.17094e-10	2.43092e-10	8.7671e-11	1.38197e-10	9.9229e-11	7.9172e-11	6.8822e-11	7.5594e-11	5.9212e-11	6.3517e-11	4.90363e-10	1.04718e-10	8.9675e-11	5.1318e-11	8.9484e-11	1.29412e-10	7.3904e-11	1.19754e-10	9.2878e-11	4.21083e-10	1.35277e-10	1.09348e-10	5.4494e-11	5.7633e-11	5.5377e-11	6.1098e-11	7.3207e-11	3.0944e-11	3.6052e-11	6.5654e-11	7.5791e-11	0	7.4799e-11	4.2141e-11	9.105e-11	4.2748e-11	8.8183e-11	4.3297e-11	9.7386e-11	4.7977e-11	5.2097e-11	2.7988e-11	4.4467e-11	4.4672e-11
2024-05-29T17:54:27.421	3.77802e-09	9.48859e-10	5.90466e-10	3.07989e-10	1.35549e-10	1.38536e-10	4.60013e-10	1.39097e-10	1.1396e-10	5.9453e-11	1.18493e-10	1.12755e-10	1.14752e-10	8.0693e-11	7.6154e-11	9.8176e-11	7.3181e-11	8.2125e-11	8.114e-11	7.8351e-11	6.5744e-11	5.4809e-11	6.4318e-11	7.4601e-11	8.5407e-11	1.37374e-10	1.19541e-10	8.9543e-11	6.9508e-11	6.0662e-11	4.3203e-11	4.6976e-11	9.7855e-11	5.0986e-11	4.4603e-11	3.1839e-11	6.1508e-11	4.1814e-11	4.9862e-11	6.5767e-11	4.6828e-11	3.92013e-10	9.082e-11	3.8955e-11	6.4961e-11	4.8232e-11	3.9581e-11	7.1701e-11	5.9934e-11
2024-05-29T17:54:30.888	3.86784e-09	1.36557e-09	5.54037e-10	3.03245e-10	1.59746e-10	1.06177e-10	1.32081e-10	1.42857e-10	9.167e-11	1.0659e-10	1.11966e-10	1.33973e-10	1.13664e-10	7.252e-11	3.91867e-10	9.4221e-11	1.37373e-10	9.111e-11	6.885e-11	1.02027e-10	1.15052e-10	4.0479e-11	5.7528e-11	4.71526e-10	5.8023e-11	1.47415e-10	1.11983e-10	6.8931e-11	5.2131e-11	6.0662e-11	6.1098e-11	7.1021e-11	3.8484e-10	5.4078e-11	4.8177e-11	0	7.4181e-11	5.6099e-11	1.8846e-11	3.2883e-11	5.7352e-11	5.0913e-11	7.7452e-11	2.7545e-11	9.5954e-11	4.8232e-11	4.8477e-11	1.10722e-10	3.4603e-11
2024-05-29T17:54:34.337	4.60523e-09	1.36753e-09	4.29296e-10	3.24327e-10	1.81671e-10	9.0701e-11	1.342e-10	9.0644e-11	1.1396e-10	1.1458e-10	9.0961e-11	5.9077e-11	1.11457e-10	8.9521e-11	4.64859e-10	1.09185e-10	1.1735e-10	5.3418e-11	6.072e-11	9.2418e-11	9.4418e-11	8.7445e-11	2.8764e-11	4.22669e-10	8.8631e-11	1.44476e-10	1.26648e-10	4.8741e-11	6.9508e-11	6.0662e-11	3.0549e-11	7.5329e-11	6.9193e-11	8.0615e-11	6.8133e-11	6.3677e-11	6.1508e-11	6.202e-11	6.2506e-11	3.797e-11	3.8235e-11	6.3822e-11	4.7429e-11	7.0226e-11	3.3925e-11	6.2268e-11	5.2361e-11	7.1701e-11	3.4603e-11
2024-05-29T17:54:37.796	4.64019e-09	8.71056e-10	5.69632e-10	2.97731e-10	7.8259e-11	5.45033e-10	1.11272e-10	1.21829e-10	1.40934e-10	8.703e-11	9.8885e-11	1.08243e-10	1.05738e-10	7.4227e-11	4.2013e-11	1.62417e-10	1.02254e-10	5.0932e-11	6.072e-11	8.798e-11	1.07778e-10	4.9576e-11	1.18597e-10	6.4606e-11	7.8563e-11	1.41476e-10	1.17076e-10	6.2133e-11	8.3338e-11	4.2895e-11	5.2912e-11	4.16397e-10	1.7866e-11	6.2444e-11	3.6418e-11	6.3677e-11	4.5426e-11	5.9134e-11	4.9862e-11	6.0037e-11	5.7352e-11	7.2001e-11	3.3538e-11	5.8432e-11	7.062e-11	4.403e-11	4.4253e-11	5.9659e-11	8.7082e-11
2024-05-29T17:54:41.265	4.30135e-09	9.57966e-10	5.15038e-10	3.06641e-10	5.57969e-10	1.41808e-10	1.19797e-10	1.44701e-10	1.1396e-10	8.5567e-11	8.074e-11	6.3156e-11	1.5604e-10	7.0772e-11	5.9415e-11	4.7779e-11	1.25738e-10	8.369e-11	5.8511e-11	4.6209e-11	8.6971e-11	2.3371e-11	6.8472e-11	4.0861e-11	1.08551e-10	1.13433e-10	1.24324e-10	8.4422e-11	7.1648e-11	6.0662e-11	4.06045e-10	5.6147e-11	1.30065e-10	3.6052e-11	4.8177e-11	6.0966e-11	6.6866e-11	4.9475e-11	7.299e-11	8.0548e-11	5.7352e-11	6.0852e-11	5.8089e-11	4.3553e-11	4.7977e-11	7.0996e-11	6.8557e-11	3.9773e-11	3.31298e-10
2024-05-29T17:54:44.713	5.27699e-09	1.08421e-09	7.21706e-10	3.19854e-10	1.55428e-10	8.3713e-11	1.03408e-10	1.34249e-10	1.18345e-10	7.2814e-11	6.902e-11	1.16024e-10	4.84035e-10	6.3301e-11	1.12283e-10	9.149e-11	7.9847e-11	8.6734e-11	7.6116e-11	7.4867e-11	7.7092e-11	7.5729e-11	7.0457e-11	6.8779e-11	1.05935e-10	1.13433e-10	1.11983e-10	7.897e-11	8.8606e-11	5.5377e-11	4.6664e-11	9.3952e-11	6.6847e-11	6.4994e-11	6.0393e-11	5.8129e-11	4.5426e-11	4.5805e-11	3.82072e-10	3.797e-11	2.7036e-11	3.8486e-11	1.9363e-11	9.9315e-11	1.9586e-11	5.9072e-11	6.2584e-11	1.47481e-10	4.4672e-11
2024-05-29T17:54:48.171	3.70553e-09	1.15398e-09	4.9408e-10	2.79801e-10	1.3173e-10	1.31785e-10	1.25532e-10	5.3995e-11	9.3048e-11	9.265e-11	6.902e-11	4.69968e-10	8.6334e-11	6.7141e-11	6.9216e-11	1.08017e-10	8.2979e-11	7.7242e-11	5.1318e-11	1.00711e-10	9.1512e-11	6.1833e-11	5.2516e-11	9.7268e-11	7.3011e-11	1.19569e-10	1.17076e-10	5.7154e-11	9.6752e-11	4.2895e-11	4.6664e-11	6.4017e-11	4.7268e-11	6.9814e-11	5.7583e-11	6.6277e-11	4.5426e-11	4.0798e-10	2.6653e-11	8.9049e-11	6.6225e-11	4.3029e-11	6.7075e-11	3.8955e-11	4.3797e-11	3.9382e-11	3.51807e-10	4.8711e-11	6.626e-11
2024-05-29T17:54:51.630	3.69293e-09	1.06995e-09	4.68984e-10	2.50096e-10	2.60211e-10	1.42878e-10	8.8765e-11	1.71522e-10	1.2964e-10	8.2564e-11	8.527e-11	1.5946e-10	6.6874e-11	7.9126e-11	6.3517e-11	7.1225e-11	1.1735e-10	6.2378e-11	6.885e-11	7.6629e-11	1.01319e-10	4.9576e-11	5.2516e-11	6.6726e-11	9.622e-11	1.13433e-10	7.4438e-11	3.84948e-10	6.5019e-11	8.7559e-11	7.688e-11	9.3952e-11	5.0532e-11	3.6052e-11	4.4603e-11	7.3528e-11	4.00336e-10	4.5805e-11	4.2141e-11	4.6504e-11	5.7352e-11	5.7729e-11	8.6594e-11	4.3553e-11	7.3286e-11	3.31251e-10	0	5.6247e-11	9.7872e-11
2024-05-29T17:54:55.089	4.03315e-09	1.28233e-09	6.30551e-10	3.20499e-10	1.76927e-10	7.4057e-11	9.188e-11	8.917e-11	1.38197e-10	4.53893e-10	8.8162e-11	1.29238e-10	1.02152e-10	5.7059e-11	1.04127e-10	7.4701e-11	5.5319e-11	4.2613e-11	4.48552e-10	5.1663e-11	9.1512e-11	6.8136e-11	4.3938e-11	9.2878e-11	7.4907e-11	1.08274e-10	1.20754e-10	7.5115e-11	9.1951e-11	3.9157e-11	4.3203e-11	7.1021e-11	4.3762e-11	5.4078e-11	7.2837e-11	5.8129e-11	5.8645e-11	7.4799e-11	1.8846e-11	2.6849e-11	7.1531e-11	5.4428e-11	3.8726e-11	4.3553e-11	3.9173e-11	7.0996e-11	2.7988e-11	4.4467e-11	4.4672e-11
2024-05-29T17:54:58.547	4.44454e-09	1.02987e-09	5.48557e-10	3.11997e-10	1.74018e-10	1.17094e-10	1.24406e-10	1.04244e-10	4.62496e-10	6.1539e-11	8.8162e-11	8.9315e-11	9.0548e-11	7.7527e-11	5.2666e-11	1.01978e-10	6.9609e-11	7.5544e-11	8.5871e-11	1.03327e-10	5.9261e-11	7.2033e-11	5.2516e-11	7.2713e-11	9.622e-11	1.38411e-10	1.20754e-10	8.4422e-11	5.2131e-11	7.0047e-11	1.7637e-11	1.00439e-10	7.3662e-11	4.0308e-11	3.67809e-10	4.5026e-11	5.2454e-11	4.1814e-11	4.9862e-11	8.2755e-11	7.647e-11	7.2001e-11	7.245e-11	3.40713e-10	6.4961e-11	2.7847e-11	5.2361e-11	2.8123e-11	5.6506e-11
2024-05-29T17:55:02.010	3.6675e-09	1.04019e-09	4.44509e-10	2.65364e-10	1.4288e-10	8.9005e-11	9.7814e-11	1.30241e-10	9.027e-11	1.05399e-10	5.0073e-11	1.08243e-10	9.8436e-11	6.898e-11	5.9415e-11	9.6876e-11	1.16258e-10	4.2613e-11	9.0354e-11	7.8351e-11	5.4512e-11	4.6741e-11	6.8472e-11	7.6444e-11	9.4751e-11	4.65552e-10	1.15823e-10	7.5115e-11	8.1506e-11	7.2203e-11	6.5993e-11	6.6434e-11	8.1871e-11	4.0308e-11	6.8133e-11	8.2207e-11	1.8545e-11	4.9475e-11	4.6164e-11	6.8452e-11	2.7036e-11	6.666e-11	3.8726e-11	7.2877e-11	7.5857e-11	2.7847e-11	5.5976e-11	6.2886e-11	4.4672e-11
2024-05-29T17:55:05.463	3.63072e-09	1.03246e-09	3.84751e-10	3.21141e-10	1.9781e-10	1.17094e-10	9.3399e-11	8.3013e-11	1.26649e-10	4.7668e-11	5.9247e-11	8.6479e-11	7.0492e-11	8.3739e-11	8.0969e-11	5.9591e-11	1.23697e-10	6.6407e-11	7.0736e-11	8.798e-11	1.24089e-10	5.4809e-11	7.9644e-11	6.4606e-11	1.78052e-10	1.53123e-10	1.25492e-10	1.03396e-10	1.04263e-10	6.3139e-11	5.8497e-11	1.7755e-11	6.6847e-11	3.72492e-10	6.0393e-11	6.8779e-11	3.709e-11	3.2389e-11	0	3.797e-11	5.4072e-11	9.0258e-11	6.9814e-11	4.3553e-11	3.3925e-11	5.5694e-11	3.9581e-11	7.7019e-11	4.4672e-11
2024-05-29T17:55:08.930	4.39273e-09	8.63354e-10	5.06162e-10	1.95214e-10	1.83534e-10	8.5513e-11	1.342e-10	1.20737e-10	9.7067e-11	1.00494e-10	1.01389e-10	7.061e-11	9.5879e-11	9.4951e-11	4.76907e-10	9.6876e-11	9.3116e-11	9.111e-11	6.691e-11	1.03327e-10	7.7092e-11	7.2033e-11	6.6428e-11	4.19695e-10	1.28657e-10	1.41476e-10	1.0103e-10	9.4387e-11	5.7633e-11	5.2535e-11	5.5775e-11	9.3952e-11	5.3597e-11	5.7004e-11	6.3079e-11	5.8129e-11	3.709e-11	4.9475e-11	6.5285e-11	6.5767e-11	3.3112e-11	7.4528e-11	5.8089e-11	6.7471e-11	3.9173e-11	1.9691e-11	4.8477e-11	5.9659e-11	5.2857e-11
2024-05-29T17:55:12.381	3.28623e-09	1.51048e-09	4.55254e-10	2.35597e-10	4.97698e-10	1.63745e-10	9.3399e-11	9.6314e-11	7.3127e-11	1.1458e-10	7.9172e-11	1.37644e-10	1.02152e-10	5.7059e-11	7.1014e-11	1.08017e-10	1.19503e-10	5.0932e-11	1.00036e-10	6.1129e-11	1.05242e-10	1.07097e-10	7.6102e-11	9.8688e-11	7.1063e-11	1.2878e-10	1.32279e-10	4.2211e-11	7.5745e-11	4.6332e-11	4.24401e-10	5.0219e-11	9.9472e-11	7.6479e-11	8.5409e-11	6.0966e-11	5.8645e-11	6.7423e-11	5.3305e-11	3.61717e-10	6.6225e-11	7.2001e-11	0	3.8955e-11	6.1938e-11	0	9.0692e-11	5.9659e-11	3.70537e-10
2024-05-29T17:55:15.840	4.07137e-09	1.21493e-09	6.24291e-10	2.98426e-10	2.11123e-10	9.4e-11	1.57363e-10	1.0799e-10	8.444e-11	8.102e-11	5.2517e-11	1.04732e-10	4.91416e-10	5.9212e-11	6.9216e-11	1.04436e-10	1.16258e-10	5.0932e-11	4.59e-11	9.3851e-11	8.6971e-11	4.27432e-10	4.6971e-11	8.1722e-11	8.0329e-11	1.44476e-10	9.9577e-11	5.1698e-11	8.8606e-11	9.7501e-11	4.6664e-11	9.0534e-11	5.3597e-11	4.0308e-11	3.1539e-11	7.1193e-11	4.5426e-11	4.5805e-11	4.2141e-11	5.023e-11	9.5587e-11	6.666e-11	7.7452e-11	5.8432e-11	6.4961e-11	4.403e-11	5.9372e-11	7.1701e-11	2.8253e-11
2024-05-29T17:55:19.303	4.21757e-09	8.66443e-10	5.65373e-10	1.71493e-10	1.30432e-10	1.5317e-10	1.472e-10	8.917e-11	3.5682e-11	1.17839e-10	7.5939e-11	4.5978e-10	7.8812e-11	3.5386e-11	4.7638e-11	8.5766e-11	1.19503e-10	6.4424e-11	8.2747e-11	5.8905e-11	8.218e-11	5.2258e-11	5.5079e-11	7.4601e-11	8.2057e-11	1.20759e-10	9.1964e-11	5.7154e-11	5.4951e-11	8.3983e-11	6.8309e-11	7.1021e-11	6.6847e-11	8.455e-11	3.1539e-11	6.6277e-11	8.0837e-11	3.81859e-10	4.6164e-11	6.0037e-11	5.058e-11	6.0852e-11	4.7429e-11	6.7471e-11	3.9173e-11	5.9072e-11	3.23987e-10	7.7019e-11	2.8253e-11
2024-05-29T17:55:22.763	4.53303e-09	9.13717e-10	7.43156e-10	2.99119e-10	2.79137e-10	1.70133e-10	1.4234e-10	1.02964e-10	1.094e-10	8.5567e-11	8.9572e-11	9.3408e-11	7.8812e-11	8.0693e-11	7.2768e-11	6.3705e-11	1.04718e-10	6.8332e-11	9.3223e-11	1.12004e-10	8.6971e-11	8.4264e-11	6.4318e-11	1.00088e-10	8.0329e-11	1.09587e-10	1.06647e-10	3.4465e-11	3.99673e-10	6.0662e-11	9.1647e-11	4.6976e-11	8.5681e-11	3.1222e-11	7.9372e-11	5.1992e-11	8.6985e-11	6.4778e-11	5.6539e-11	3.797e-11	5.4072e-11	2.7214e-11	5.8089e-11	7.0226e-11	5.5399e-11	8.1187e-11	6.5638e-11	9.7423e-11	2.8253e-11
2024-05-29T17:55:26.219	4.11905e-09	1.16428e-09	5.86358e-10	2.99119e-10	2.07055e-10	1.31785e-10	1.37309e-10	1.10417e-10	8.8848e-11	1.13473e-10	8.2278e-11	1.48952e-10	1.11457e-10	4.7476e-11	5.2666e-11	6.9421e-11	4.7908e-11	7.8904e-11	7.9501e-11	7.6629e-11	1.19656e-10	7.3904e-11	6.2137e-11	1.02831e-10	6.9061e-11	1.53123e-10	1.11983e-10	1.1168e-10	6.9508e-11	6.0662e-11	4.9886e-11	9.0534e-11	6.6847e-11	6.4994e-11	2.5752e-11	5.1992e-11	3.64827e-10	2.6445e-11	6.7951e-11	6.5767e-11	9.3656e-11	4.3029e-11	7.4992e-11	6.1593e-11	6.1938e-11	3.45572e-10	5.5976e-11	5.2614e-11	5.6506e-11
2024-05-29T17:55:29.674	3.44037e-09	1.07431e-09	4.77917e-10	1.70281e-10	2.11123e-10	1.23428e-10	1.1622e-10	1.4921e-10	1.19416e-10	4.4462e-10	8.527e-11	1.65595e-10	1.17955e-10	6.5249e-11	6.15e-11	8.2756e-11	1.02254e-10	4.2613e-11	4.61288e-10	9.2418e-11	1.51533e-10	5.4809e-11	8.6292e-11	5.7786e-11	1.01885e-10	1.12166e-10	1.19541e-10	4.5593e-11	7.3725e-11	6.7822e-11	6.3593e-11	6.4017e-11	8.1871e-11	4.0308e-11	6.3079e-11	6.3677e-11	7.1825e-11	4.1814e-11	3.2643e-11	8.0548e-11	3.3112e-11	8.1642e-11	8.8732e-11	6.4599e-11	1.05476e-10	3.4105e-11	4.4253e-11	8.1993e-11	7.4751e-11
2024-05-29T17:55:33.140	3.86958e-09	1.16711e-09	3.76023e-10	2.15391e-10	1.72052e-10	1.15786e-10	1.17425e-10	9.3522e-11	2.06835e-10	1.01742e-10	7.7572e-11	8.5026e-11	7.722e-11	5.7059e-11	5.5007e-11	1.23364e-10	1.00999e-10	4.78056e-10	6.885e-11	1.13189e-10	7.7092e-11	7.3904e-11	2.8764e-11	9.1368e-11	9.02e-11	1.3098e-10	1.20754e-10	4.8741e-11	5.2131e-11	2.4765e-11	6.3593e-11	7.7393e-11	4.7268e-11	6.4994e-11	5.4628e-11	5.5146e-11	6.4243e-11	3.7399e-11	4.2141e-11	3.797e-11	6.6225e-11	4.7136e-11	9.082e-11	6.7471e-11	5.5399e-11	6.5307e-11	4.8477e-11	6.8888e-11	6.3176e-11
2024-05-29T17:55:36.591	3.41484e-09	1.39077e-09	4.7027e-10	2.98426e-10	1.74018e-10	1.23428e-10	8.7165e-11	1.37179e-10	1.51387e-10	9.7949e-11	7.2562e-11	8.5026e-11	4.4583e-11	9.6261e-11	6.5472e-11	5.517e-11	5.06968e-10	3.2212e-11	6.4912e-11	5.8905e-11	9.2976e-11	8.0958e-11	7.6102e-11	5.2751e-11	9.7667e-11	1.56813e-10	1.26648e-10	6.8931e-11	6.9508e-11	3.5023e-11	7.688e-11	7.3207e-11	6.4416e-11	4.4155e-11	9.1046e-11	5.8129e-11	5.2454e-11	8.5693e-11	4.9862e-11	5.023e-11	8.1108e-11	3.333e-11	6.7075e-11	5.8432e-11	9.1869e-11	4.403e-11	7.1356e-11	7.7019e-11	2.8253e-11
2024-05-29T17:55:40.049	3.80643e-09	9.13717e-10	5.90466e-10	2.88546e-10	1.55428e-10	1.24656e-10	1.17425e-10	6.7125e-11	1.51387e-10	8.9884e-11	1.03833e-10	5.6928e-11	7.722e-11	9.4951e-11	7.1014e-11	9.2866e-11	1.20566e-10	8.6734e-11	9.7368e-11	8.798e-11	6.1498e-11	4.0479e-11	8.1357e-11	6.6726e-11	5.0249e-11	1.33141e-10	1.0103e-10	7.5115e-11	7.1648e-11	5.2535e-11	5.2912e-11	3.551e-11	6.6847e-11	3.74667e-10	1.8209e-11	6.3677e-11	4.5426e-11	3.7399e-11	5.6539e-11	9.865e-11	6.3405e-11	6.9382e-11	7.4992e-11	5.509e-11	2.7699e-11	6.5307e-11	3.9581e-11	4.4467e-11	7.9912e-11
2024-05-29T17:55:43.507	3.58037e-09	1.20389e-09	6.77217e-10	1.98372e-10	1.74993e-10	1.01781e-10	1.43325e-10	1.44701e-10	1.28655e-10	6.926e-11	1.08555e-10	8.9315e-11	5.4603e-11	8.3739e-11	4.56374e-10	5.517e-11	1.33609e-10	6.4424e-11	6.072e-11	9.5263e-11	8.3808e-11	7.0112e-11	3.3214e-11	4.55924e-10	1.08551e-10	1.27665e-10	1.15823e-10	8.0828e-11	8.1506e-11	6.3139e-11	2.4943e-11	8.1365e-11	9.4537e-11	9.1916e-11	4.8177e-11	4.1103e-11	3.709e-11	7.9336e-11	5.9597e-11	2.6849e-11	4.6828e-11	2.7214e-11	0	2.7545e-11	5.5399e-11	3.4105e-11	4.8477e-11	4.4467e-11	6.626e-11
2024-05-29T17:55:46.967	4.67776e-09	8.97492e-10	3.20502e-10	2.65364e-10	1.6291e-10	1.10397e-10	8.045e-11	1.72292e-10	1.27661e-10	1.08932e-10	1.36212e-10	7.4056e-11	8.1904e-11	9.2276e-11	1.11155e-10	6.757e-11	1.10639e-10	9.9285e-11	8.2747e-11	6.1129e-11	9.5838e-11	5.4809e-11	7.4268e-11	4.64989e-10	4.7375e-11	8.9477e-11	1.05271e-10	1.10343e-10	4.2565e-11	7.0047e-11	4.6664e-11	6.6434e-11	4.08575e-10	9.7074e-11	7.0524e-11	5.1992e-11	6.6866e-11	4.5805e-11	7.299e-11	6.0037e-11	7.8823e-11	2.7214e-11	9.6815e-11	7.5435e-11	3.9173e-11	8.1187e-11	5.5976e-11	3.9773e-11	3.4603e-11
2024-05-29T17:55:50.430	4.58765e-09	1.02922e-09	6.00109e-10	2.41672e-10	1.18111e-10	1.29452e-10	1.35244e-10	9.7681e-11	1.00925e-10	1.0659e-10	7.427e-11	9.07e-11	1.20043e-10	6.5249e-11	4.44903e-10	9.8176e-11	1.11785e-10	5.3418e-11	7.4366e-11	5.8905e-11	4.3486e-11	6.6102e-11	5.7528e-11	4.60177e-10	7.8563e-11	1.3633e-10	8.3661e-11	7.3112e-11	3.8856e-11	5.5377e-11	6.1098e-11	9.2259e-11	4.3762e-11	6.9814e-11	4.4603e-11	5.8129e-11	7.6464e-11	5.6099e-11	4.2141e-11	4.6504e-11	4.6828e-11	8.1642e-11	3.3538e-11	3.8955e-11	5.5399e-11	2.7847e-11	3.4278e-11	6.8888e-11	3.9956e-11
2024-05-29T17:55:53.884	3.57472e-09	5.70898e-10	5.59464e-10	1.83172e-10	1.76927e-10	5.5113e-10	1.11272e-10	1.19634e-10	9.167e-11	6.1539e-11	7.427e-11	8.0508e-11	1.02152e-10	9.2276e-11	5.5007e-11	9.4221e-11	8.8913e-11	7.0205e-11	6.072e-11	8.9484e-11	1.1622e-10	5.4809e-11	2.8764e-11	8.9832e-11	1.08551e-10	1.40462e-10	1.27794e-10	6.4479e-11	5.7633e-11	6.3139e-11	3.0549e-11	3.89808e-10	5.3597e-11	6.4994e-11	0	5.1992e-11	7.1825e-11	5.9134e-11	3.7692e-11	7.1036e-11	3.65737e-10	0	7.7452e-11	5.509e-11	7.062e-11	5.2097e-11	5.2361e-11	3.9773e-11	3.9956e-11
2024-05-29T17:55:57.341	4.10103e-09	1.0618e-09	4.36969e-10	3.26909e-10	1.9434e-10	1.8473e-10	1.66909e-10	1.23985e-10	1.50544e-10	7.7842e-11	6.1326e-11	9.4733e-11	8.6334e-11	6.898e-11	6.5472e-11	1.08017e-10	8.2979e-11	9.9285e-11	3.2456e-11	1.00711e-10	7.7092e-11	7.2033e-11	4.60224e-10	7.8243e-11	8.0329e-11	1.3098e-10	7.8258e-11	5.1698e-11	8.3338e-11	4.2895e-11	4.6664e-11	3.69036e-10	3.5731e-11	7.6479e-11	7.0524e-11	6.0966e-11	6.939e-11	3.2389e-11	7.5385e-11	6.8452e-11	6.8929e-11	3.8486e-11	3.8726e-11	6.1593e-11	2.7699e-11	2.7847e-11	6.8557e-11	9.9432e-11	5.6506e-11
2024-05-29T17:56:00.801	4.01307e-09	1.01747e-09	3.76023e-10	2.62224e-10	5.96291e-10	1.24656e-10	1.15003e-10	1.19634e-10	1.03417e-10	1.31987e-10	6.5287e-11	1.14945e-10	9.3252e-11	5.7059e-11	8.2511e-11	5.7423e-11	1.20566e-10	6.6407e-11	7.0736e-11	1.12004e-10	1.44226e-10	5.7246e-11	4.9821e-11	4.7182e-11	9.1742e-11	1.12166e-10	7.4438e-11	9.2801e-11	6.2654e-11	3.5023e-11	4.07193e-10	5.8887e-11	7.3662e-11	3.6052e-11	4.8177e-11	5.1992e-11	6.1508e-11	3.2389e-11	5.9597e-11	9.865e-11	8.1108e-11	4.3029e-11	5.4767e-11	9.1357e-11	4.3797e-11	5.9072e-11	0	5.6247e-11	3.24604e-10
2024-05-29T17:56:04.266	3.60471e-09	1.03891e-09	5.64303e-10	3.01876e-10	2.04575e-10	1.85553e-10	9.4893e-11	7.9756e-11	1.32554e-10	1.19962e-10	7.427e-11	9.3408e-11	9.5879e-11	9.8828e-11	7.2768e-11	6.757e-11	7.9847e-11	6.4424e-11	6.4912e-11	6.1129e-11	4.61675e-10	4.6741e-11	7.2388e-11	8.3407e-11	1.05935e-10	1.44476e-10	1.09348e-10	6.8931e-11	4.915e-11	6.0662e-11	6.8309e-11	4.6976e-11	7.1463e-11	5.7004e-11	5.4628e-11	7.5791e-11	7.4181e-11	4.9475e-11	3.2643e-11	1.15483e-10	4.6828e-11	7.6973e-11	3.3538e-11	8.9256e-11	5.1821e-11	4.8232e-11	8.3965e-11	9.5371e-11	6.626e-11
2024-05-29T17:56:07.717	3.82231e-09	9.62834e-10	4.84198e-10	2.47599e-10	1.57602e-10	1.49138e-10	1.2327e-10	9.6314e-11	1.58777e-10	1.16763e-10	4.7503e-11	7.4056e-11	1.35593e-10	8.0693e-11	3.5507e-11	4.7779e-11	6.7752e-11	4.8318e-11	2.8108e-11	6.1129e-11	1.07778e-10	7.9253e-11	7.0457e-11	8.0001e-11	8.3749e-11	1.38411e-10	1.08006e-10	7.7067e-11	8.1506e-11	6.0662e-11	6.3593e-11	9.0534e-11	7.5798e-11	6.9814e-11	5.4628e-11	6.0966e-11	6.4243e-11	3.6929e-10	3.2643e-11	6.2967e-11	7.1531e-11	5.4428e-11	3.8726e-11	3.3736e-11	4.3797e-11	4.8232e-11	3.64385e-10	8.6682e-11	6.9206e-11
2024-05-29T17:56:11.175	3.91799e-09	1.17979e-09	4.5459e-10	2.55827e-10	2.19033e-10	1.41808e-10	1.13773e-10	1.25049e-10	1.00925e-10	7.106e-11	6.7179e-11	9.4733e-11	7.5594e-11	8.6678e-11	7.448e-11	1.05643e-10	1.1292e-10	7.3808e-11	7.0736e-11	8.6449e-11	6.5744e-11	4.0479e-11	5.7528e-11	8.5059e-11	8.3749e-11	1.20759e-10	1.11983e-10	4.54955e-10	4.5975e-11	8.3983e-11	5.2912e-11	9.5615e-11	5.0532e-11	7.4324e-11	0	3.6764e-11	4.14269e-10	2.6445e-11	4.6164e-11	6.8452e-11	7.647e-11	6.0852e-11	3.3538e-11	2.7545e-11	4.3797e-11	3.50031e-10	1.9791e-11	8.437e-11	8.7082e-11
2024-05-29T17:56:14.634	3.76195e-09	1.30351e-09	5.74385e-10	2.07556e-10	1.7106e-10	1.07602e-10	8.8765e-11	1.00357e-10	9.167e-11	2.2471e-11	9.0961e-11	7.8944e-11	1.14752e-10	7.4227e-11	7.7792e-11	9.0093e-11	7.1417e-11	1.85045e-10	7.0736e-11	9.6653e-11	5.1975e-11	9.201e-11	5.2516e-11	8.6679e-11	9.02e-11	1.29885e-10	4.3438e-10	1.00483e-10	1.2164e-10	4.6332e-11	5.8497e-11	7.3207e-11	5.0532e-11	4.4155e-11	6.8133e-11	7.7988e-11	5.5636e-11	8.151e-11	4.9862e-11	6.5767e-11	3.8235e-11	6.0852e-11	3.8726e-11	4.7709e-11	7.5857e-11	2.7847e-11	6.2584e-11	2.8123e-11	5.2857e-11
2024-05-29T17:56:18.093	4.61108e-09	8.90769e-10	4.19328e-10	2.76075e-10	1.56519e-10	9.5607e-11	1.20966e-10	1.05507e-10	4.67425e-10	7.2814e-11	1.15276e-10	9.9858e-11	1.43602e-10	8.3739e-11	5.9415e-11	1.03214e-10	6.9609e-11	8.5226e-11	7.6116e-11	8.798e-11	8.3808e-11	4.9576e-11	8.4679e-11	5.0044e-11	8.5407e-11	1.54979e-10	1.50822e-10	6.6741e-11	7.3725e-11	6.7822e-11	7.055e-11	6.4017e-11	7.3662e-11	4.7693e-11	3.71843e-10	3.6764e-11	8.4985e-11	5.6099e-11	5.9597e-11	6.8452e-11	4.2748e-11	4.7136e-11	6.1231e-11	6.1593e-11	6.1938e-11	5.2097e-11	5.5976e-11	4.8711e-11	7.4751e-11
2024-05-29T17:56:21.552	5.3881e-09	9.43211e-10	6.22837e-10	2.81277e-10	1.15195e-10	1.18388e-10	1.342e-10	4.76037e-10	1.19416e-10	8.9884e-11	8.8162e-11	6.6987e-11	1.12566e-10	6.898e-11	6.5472e-11	7.9632e-11	1.19503e-10	1.27828e-10	6.072e-11	8.4892e-11	8.218e-11	9.201e-11	4.3938e-11	7.4601e-11	5.0249e-11	1.09587e-10	1.23146e-10	7.897e-11	7.7713e-11	2.4765e-11	8.2727e-11	6.6434e-11	7.7875e-11	8.645e-11	3.1539e-11	7.3528e-11	3.709e-11	1.02423e-10	3.7692e-11	3.797e-11	6.0454e-11	5.7729e-11	9.6815e-11	2.7545e-11	4.7977e-11	4.8232e-11	6.2584e-11	7.4408e-11	7.4751e-11
2024-05-29T17:56:25.012	3.59724e-09	1.34587e-09	6.05122e-10	2.87828e-10	1.61862e-10	1.5317e-10	7.6873e-11	9.7681e-11	1.15072e-10	1.1458e-10	1.38946e-10	4.9929e-11	7.5594e-11	7.7527e-11	5.5007e-11	1.13737e-10	4.52245e-10	8.9675e-11	1.11254e-10	5.1663e-11	1.03951e-10	9.7766e-11	5.5079e-11	7.2713e-11	1.11105e-10	1.40462e-10	1.11983e-10	8.2645e-11	7.5745e-11	5.2535e-11	4.6664e-11	6.4017e-11	5.3597e-11	5.4078e-11	3.6418e-11	5.8129e-11	8.4985e-11	3.2389e-11	6.5285e-11	5.6956e-11	5.058e-11	3.333e-11	5.8089e-11	5.1532e-11	0	5.5694e-11	3.4278e-11	3.4444e-11	4.4672e-11
2024-05-29T17:56:28.468	4.09445e-09	8.27002e-10	5.31209e-10	3.00501e-10	2.09505e-10	1.80559e-10	1.56466e-10	1.28185e-10	7.1365e-11	7.7842e-11	1.1743e-10	9.4733e-11	5.8978e-11	6.7141e-11	9.2591e-11	4.67322e-10	5.9752e-11	6.0264e-11	5.8511e-11	1.0461e-10	7.3504e-11	5.4809e-11	2.3486e-11	6.8779e-11	4.54718e-10	1.29885e-10	1.06647e-10	5.4494e-11	8.6885e-11	3.0331e-11	3.5275e-11	5.6147e-11	3.5731e-11	3.6052e-11	6.0393e-11	4.8634e-11	6.4243e-11	4.9475e-11	4.2141e-11	6.5767e-11	6.8929e-11	7.6973e-11	2.7383e-11	8.0307e-11	3.3925e-11	5.2097e-11	5.2361e-11	5.9659e-11	2.8253e-11
2024-05-29T17:56:31.927	4.44454e-09	1.13418e-09	5.96068e-10	3.17259e-10	1.45237e-10	1.10397e-10	6.4969e-11	1.29209e-10	1.5306e-10	1.10085e-10	1.09703e-10	7.2354e-11	9.3252e-11	6.129e-11	6.9216e-11	4.62412e-10	7.1417e-11	1.28849e-10	5.1318e-11	1.12004e-10	5.1975e-11	5.7246e-11	6.8472e-11	7.0773e-11	4.37422e-10	1.54979e-10	8.5386e-11	4.2211e-11	7.1648e-11	4.2895e-11	3.5275e-11	5.6147e-11	5.9254e-11	6.7448e-11	3.1539e-11	4.1103e-11	4.9066e-11	5.9134e-11	5.9597e-11	3.2883e-11	5.7352e-11	4.3029e-11	7.7452e-11	6.4599e-11	5.8759e-11	0	4.4253e-11	7.7019e-11	5.9934e-11
2024-05-29T17:56:35.385	3.58224e-09	1.25336e-09	5.56757e-10	2.92821e-10	1.7106e-10	1.24656e-10	1.11272e-10	1.18521e-10	7.8176e-11	1.13473e-10	9.6316e-11	1.08243e-10	1.14752e-10	7.0772e-11	9.659e-11	9.2866e-11	1.10639e-10	8.5226e-11	7.4366e-11	7.6629e-11	8.8511e-11	4.3722e-11	6.8472e-11	3.7301e-11	9.02e-11	1.056e-10	1.61106e-10	7.1052e-11	4.5975e-11	8.3983e-11	8.0825e-11	8.5151e-11	4.00288e-10	2.5493e-11	4.4603e-11	5.1992e-11	5.5636e-11	4.5805e-11	5.9597e-11	4.2452e-11	8.1108e-11	6.666e-11	5.123e-11	5.1532e-11	5.1821e-11	2.7847e-11	0	5.9659e-11	5.6506e-11
2024-05-29T17:56:38.843	3.46572e-09	1.21933e-09	5.20291e-10	2.79801e-10	2.37659e-10	1.95936e-10	8.7165e-11	1.63613e-10	1.094e-10	7.106e-11	1.1743e-10	1.11644e-10	1.21073e-10	5.0044e-11	4.07946e-10	7.4701e-11	1.43724e-10	4.5555e-11	8.2747e-11	5.4185e-11	9.1512e-11	5.9583e-11	7.4268e-11	4.86914e-10	9.4751e-11	1.40462e-10	1.19541e-10	8.4422e-11	5.2131e-11	4.2895e-11	8.8187e-11	4.6976e-11	3.96684e-10	5.7004e-11	6.3079e-11	6.8779e-11	6.4243e-11	5.2891e-11	4.6164e-11	7.8278e-11	5.058e-11	6.9382e-11	6.422e-11	4.3553e-11	8.5375e-11	4.8232e-11	3.4278e-11	2.8123e-11	4.4672e-11
2024-05-29T17:56:42.302	3.48896e-09	8.97492e-10	4.3766e-10	3.5892e-10	5.11853e-10	1.2827e-10	1.29937e-10	1.23985e-10	8.1368e-11	8.4079e-11	8.2278e-11	7.7349e-11	1.14752e-10	9.0909e-11	9.659e-11	6.1682e-11	1.25738e-10	4.5555e-11	7.2574e-11	4.6209e-11	4.9308e-11	4.9576e-11	7.4268e-11	7.6444e-11	7.4907e-11	1.21937e-10	1.14558e-10	4.8741e-11	8.8606e-11	1.7512e-11	4.25499e-10	3.0753e-11	1.10132e-10	4.7693e-11	6.5654e-11	6.0966e-11	6.939e-11	6.7423e-11	6.5285e-11	7.8278e-11	7.4041e-11	7.4528e-11	4.7429e-11	6.4599e-11	3.9173e-11	6.2268e-11	3.4278e-11	8.6682e-11	6.3176e-11
2024-05-29T17:56:45.761	3.40299e-09	9.84782e-10	4.4722e-10	2.58244e-10	1.86294e-10	1.00273e-10	1.37309e-10	1.0799e-10	1.094e-10	5.5043e-11	9.7609e-11	1.04732e-10	1.20043e-10	7.7527e-11	6.5472e-11	5.517e-11	1.02254e-10	7.5544e-11	4.8684e-11	8.0037e-11	9.4418e-11	6.8136e-11	7.4268e-11	3.3363e-11	8.5407e-11	1.15926e-10	9.9577e-11	7.1052e-11	7.9632e-11	7.0047e-11	4.6664e-11	5.8887e-11	5.3597e-11	7.2105e-11	6.5654e-11	4.5026e-11	3.2121e-11	4.9475e-11	4.01561e-10	6.2967e-11	1.9117e-11	2.7214e-11	8.8732e-11	7.0226e-11	4.7977e-11	2.7847e-11	1.9791e-11	3.64522e-10	6.3176e-11
2024-05-29T17:56:49.221	3.80643e-09	1.0434e-09	5.62694e-10	1.65344e-10	1.74993e-10	1.00273e-10	9.3399e-11	1.25049e-10	8.7404e-11	1.29086e-10	8.074e-11	3.96927e-10	9.969e-11	8.5221e-11	9.3943e-11	6.5666e-11	7.4903e-11	6.4424e-11	5.8511e-11	6.535e-11	7.3504e-11	5.9583e-11	8.6292e-11	8.6679e-11	7.4907e-11	1.23104e-10	1.46904e-10	5.9696e-11	8.513e-11	4.6332e-11	7.8877e-11	8.1365e-11	5.0532e-11	4.0308e-11	5.4628e-11	3.1839e-11	3.2121e-11	3.83231e-10	4.9862e-11	8.9049e-11	6.3405e-11	5.4428e-11	4.7429e-11	6.7471e-11	2.7699e-11	3.9382e-11	3.65994e-10	4.4467e-11	8.9344e-11
2024-05-29T17:56:52.678	4.11741e-09	1.15743e-09	4.3766e-10	2.46761e-10	1.84459e-10	1.25872e-10	1.72709e-10	1.00357e-10	1.15072e-10	7.9447e-11	4.75557e-10	1.37644e-10	9.191e-11	5.482e-11	7.448e-11	5.517e-11	9.0336e-11	8.8217e-11	7.6116e-11	8.4892e-11	1.19656e-10	7.3904e-11	4.9821e-11	7.4601e-11	8.3749e-11	1.056e-10	1.09348e-10	7.7067e-11	7.9632e-11	7.4296e-11	3.9439e-11	6.6434e-11	5.9254e-11	4.4155e-11	6.5654e-11	5.1992e-11	3.73215e-10	1.87e-11	4.6164e-11	3.2883e-11	4.2748e-11	4.7136e-11	5.4767e-11	7.7909e-11	5.1821e-11	3.59323e-10	5.2361e-11	4.8711e-11	9.3705e-11
2024-05-29T17:56:56.136	5.65871e-09	1.456e-09	4.29296e-10	2.39088e-10	2.17474e-10	1.34076e-10	8.8765e-11	1.56153e-10	9.027e-11	9.1278e-11	7.2562e-11	1.51442e-10	7.8812e-11	1.01331e-10	9.5276e-11	8.4274e-11	7.4903e-11	7.5544e-11	1.15891e-10	8.798e-11	9.4418e-11	5.7246e-11	6.6428e-11	8.9832e-11	9.4751e-11	1.20759e-10	1.2893e-10	4.5135e-10	6.2654e-11	8.7559e-11	5.2912e-11	4.6976e-11	6.1889e-11	5.7004e-11	4.8177e-11	6.8779e-11	5.8645e-11	1.87e-11	7.0516e-11	3.797e-11	6.6225e-11	6.3822e-11	6.422e-11	3.3736e-11	6.7849e-11	5.5694e-11	2.7988e-11	5.2614e-11	6.626e-11
2024-05-29T17:56:59.595	3.30869e-09	8.75644e-10	5.57841e-10	3.27542e-10	1.15195e-10	9.2365e-11	1.1622e-10	1.11611e-10	1.05851e-10	7.2814e-11	8.9572e-11	1.16024e-10	1.06906e-10	9.2276e-11	1.05331e-10	7.4701e-11	1.21618e-10	7.7242e-11	6.285e-11	7.3063e-11	9.7237e-11	5.7246e-11	5.7528e-11	4.7182e-11	9.622e-11	1.18367e-10	1.2893e-10	6.4479e-11	9.9824e-11	7.4296e-11	3.0549e-11	9.0534e-11	6.6847e-11	4.7693e-11	7.0524e-11	3.95533e-10	7.1825e-11	4.9475e-11	5.9597e-11	6.5767e-11	2.7036e-11	6.0852e-11	4.3297e-11	5.509e-11	3.30657e-10	5.5694e-11	6.5638e-11	7.7019e-11	4.8936e-11
2024-05-29T17:57:03.053	4.41413e-09	8.29422e-10	5.09731e-10	2.3116e-10	1.39263e-10	1.24656e-10	7.502e-11	1.51851e-10	1.0823e-10	1.18906e-10	8.6728e-11	7.8944e-11	5.8978e-11	8.3739e-11	5.5007e-11	4.2137e-11	8.8913e-11	8.8217e-11	3.975e-11	6.7361e-11	8.218e-11	7.7511e-11	6.8472e-11	9.4364e-11	6.4871e-11	4.27783e-10	1.11983e-10	1.00483e-10	8.1506e-11	3.5023e-11	6.8309e-11	3.551e-11	6.1889e-11	7.2105e-11	9.806e-11	8.4237e-11	4.1468e-11	5.9134e-11	4.2141e-11	3.2883e-11	2.7036e-11	4.7136e-11	6.422e-11	5.1532e-11	6.1938e-11	3.4105e-11	3.4278e-11	3.9773e-11	4.4672e-11
2024-05-29T17:57:06.512	4.75626e-09	1.1905e-09	5.93528e-10	2.89263e-10	1.4048e-10	1.15786e-10	1.27754e-10	1.41927e-10	1.00925e-10	1.00494e-10	9.2329e-11	6.115e-11	1.06906e-10	1.16291e-10	6.5472e-11	3.62477e-10	1.48093e-10	6.8332e-11	5.6216e-11	5.4185e-11	6.9732e-11	5.2258e-11	7.4268e-11	6.2416e-11	4.6267e-10	1.10884e-10	1.33375e-10	3.8533e-11	1.09902e-10	4.6332e-11	4.3203e-11	6.6434e-11	9.1098e-11	5.9786e-11	4.8177e-11	4.1103e-11	5.2454e-11	3.7399e-11	5.9597e-11	7.1036e-11	7.4041e-11	2.7214e-11	6.1231e-11	6.1593e-11	3.9173e-11	4.8232e-11	3.4278e-11	6.5955e-11	6.3176e-11
2024-05-29T17:57:09.978	3.92658e-09	1.11518e-09	4.44509e-10	2.99119e-10	1.26459e-10	1.25872e-10	1.11272e-10	1.05507e-10	7.3127e-11	8.5567e-11	9.5006e-11	9.07e-11	6.499e-11	4.7476e-11	7.6154e-11	5.08327e-10	1.07125e-10	1.24756e-10	6.4912e-11	1.07132e-10	7.5319e-11	7.7511e-11	5.7528e-11	8.9832e-11	4.05469e-10	7.1741e-11	1.15823e-10	8.0828e-11	7.1648e-11	2.4765e-11	6.8309e-11	8.3279e-11	3.5731e-11	6.4994e-11	4.0717e-11	2.5996e-11	4.1468e-11	5.9134e-11	7.5385e-11	8.0548e-11	4.6828e-11	3.333e-11	2.7383e-11	6.7471e-11	6.4961e-11	8.806e-11	6.2584e-11	7.7019e-11	7.7374e-11
2024-05-29T17:57:13.432	4.68351e-09	1.11638e-09	5.49107e-10	1.90923e-10	1.89014e-10	1.65596e-10	1.06094e-10	8.917e-11	1.07047e-10	1.13473e-10	7.5939e-11	6.3156e-11	1.42735e-10	7.0772e-11	4.02344e-10	9.0093e-11	1.37373e-10	7.8904e-11	6.691e-11	8.6449e-11	6.9732e-11	6.8136e-11	4.6971e-11	4.35637e-10	7.1063e-11	1.04238e-10	1.31172e-10	6.6741e-11	6.0196e-11	4.6332e-11	8.2727e-11	6.8765e-11	3.78989e-10	3.6052e-11	2.5752e-11	3.6764e-11	5.5636e-11	7.7101e-11	8.4283e-11	3.797e-11	6.8929e-11	5.4428e-11	6.422e-11	4.7709e-11	3.9173e-11	5.9072e-11	5.2361e-11	8.6682e-11	5.6506e-11
2024-05-29T17:57:16.893	3.51778e-09	1.04915e-09	7.51241e-10	2.3116e-10	1.53223e-10	1.41808e-10	1.33136e-10	1.29209e-10	1.67365e-10	9.9229e-11	8.2278e-11	8.2042e-11	1.00929e-10	1.08492e-10	6.5472e-11	9.0093e-11	1.33609e-10	7.3808e-11	7.0736e-11	8.6449e-11	8.5404e-11	4.6741e-11	4.09151e-10	5.5326e-11	1.01885e-10	1.21937e-10	1.51786e-10	6.2133e-11	4.915e-11	7.6332e-11	7.8877e-11	4.03322e-10	5.0532e-11	3.6052e-11	4.0717e-11	5.5146e-11	3.2121e-11	6.4778e-11	7.5385e-11	5.023e-11	8.1108e-11	6.0852e-11	4.7429e-11	4.3553e-11	0	5.2097e-11	6.2584e-11	5.6247e-11	7.4751e-11
2024-05-29T17:57:20.346	3.58224e-09	8.6103e-10	4.67693e-10	2.34716e-10	5.54298e-10	9.8742e-11	1.54657e-10	7.8077e-11	7.8176e-11	7.106e-11	7.7572e-11	1.20244e-10	8.1904e-11	7.9126e-11	9.3943e-11	1.13737e-10	7.9847e-11	7.0205e-11	1.6228e-11	5.4185e-11	7.8825e-11	7.7511e-11	2.8764e-11	8.5059e-11	9.02e-11	1.19569e-10	8.7077e-11	1.00483e-10	6.7301e-11	5.2535e-11	4.17006e-10	5.6147e-11	8.9329e-11	5.7004e-11	8.5409e-11	6.6277e-11	7.1825e-11	3.7399e-11	5.6539e-11	5.6956e-11	6.3405e-11	1.9243e-11	6.422e-11	5.1532e-11	5.8759e-11	0	6.2584e-11	5.9659e-11	3.25831e-10
2024-05-29T17:57:23.805	3.98445e-09	9.55173e-10	3.90953e-10	2.14427e-10	1.75963e-10	1.01781e-10	1.39343e-10	1.41927e-10	1.05851e-10	9.4003e-11	7.427e-11	1.36736e-10	1.00929e-10	8.5221e-11	6.15e-11	7.9632e-11	8.1428e-11	7.7242e-11	6.285e-11	9.6653e-11	1.10256e-10	9.0514e-11	8.3035e-11	7.6444e-11	9.4751e-11	1.01458e-10	1.14558e-10	8.9543e-11	7.3725e-11	3.9157e-11	7.8877e-11	2.511e-11	5.0532e-11	5.4078e-11	4.4603e-11	4.5026e-11	2.6227e-11	7.7101e-11	3.82072e-10	4.6504e-11	4.6828e-11	4.7136e-11	6.9814e-11	5.1532e-11	5.1821e-11	4.8232e-11	3.9581e-11	3.32761e-10	6.3176e-11
2024-05-29T17:57:27.269	4.14024e-09	9.41794e-10	6.1992e-10	2.61432e-10	1.07557e-10	1.23428e-10	1.39343e-10	1.35233e-10	8.1368e-11	7.7842e-11	6.3337e-11	1.01098e-10	1.10337e-10	9.4951e-11	5.9415e-11	5.2822e-11	1.35504e-10	4.5555e-11	5.3822e-11	8.4892e-11	9.8616e-11	9.3482e-11	4.9821e-11	9.4364e-11	1.37103e-10	1.53123e-10	1.11983e-10	5.7154e-11	1.0852e-10	5.808e-11	9.1647e-11	5.8887e-11	6.6847e-11	7.8574e-11	8.9207e-11	6.6277e-11	6.4243e-11	3.65004e-10	5.3305e-11	5.3698e-11	7.4041e-11	6.9382e-11	5.4767e-11	6.4599e-11	8.5375e-11	7.6262e-11	3.35859e-10	7.9545e-11	5.2857e-11
2024-05-29T17:57:30.725	4.4521e-09	9.03426e-10	5.3064e-10	2.70006e-10	1.85379e-10	1.30624e-10	1.22124e-10	1.36209e-10	1.41835e-10	7.9447e-11	5.6184e-10	7.8944e-11	8.0373e-11	6.5249e-11	6.5472e-11	1.2741e-10	7.9847e-11	6.0264e-11	9.3223e-11	7.3063e-11	8.3808e-11	4.3722e-11	7.4268e-11	8.9832e-11	7.6757e-11	1.55899e-10	1.03877e-10	9.5947e-11	1.02804e-10	7.4296e-11	6.3593e-11	7.3207e-11	7.7875e-11	5.0986e-11	9.2849e-11	3.6764e-11	3.80064e-10	5.6099e-11	6.5285e-11	6.0037e-11	7.8823e-11	8.3879e-11	6.9814e-11	8.7105e-11	5.8759e-11	3.24152e-10	4.8477e-11	3.9773e-11	3.4603e-11
2024-05-29T17:57:34.180	3.47154e-09	1.29219e-09	4.03914e-10	2.86385e-10	2.15904e-10	1.22187e-10	1.20966e-10	1.04244e-10	1.00925e-10	4.48859e-10	7.2562e-11	1.31152e-10	6.305e-11	1.03773e-10	5.9415e-11	6.757e-11	7.8233e-11	5.8071e-11	4.2935e-11	9.3851e-11	4.6488e-11	6.1833e-11	5.5079e-11	9.8688e-11	6.0392e-11	9.7138e-11	9.1964e-11	8.0828e-11	8.1506e-11	3.9157e-11	1.02843e-10	3.551e-11	9.621e-11	4.7693e-11	2.5752e-11	3.99782e-10	3.709e-11	7.7101e-11	6.5285e-11	5.6956e-11	6.3405e-11	5.4428e-11	6.1231e-11	4.7709e-11	3.55266e-10	4.403e-11	6.5638e-11	4.4467e-11	9.3705e-11
2024-05-29T17:57:37.638	5.73317e-09	1.02075e-09	4.84821e-10	2.3116e-10	2.09505e-10	1.13123e-10	1.27754e-10	1.30241e-10	5.08586e-10	6.5514e-11	8.3787e-11	8.3547e-11	1.16897e-10	4.187e-11	6.5472e-11	7.638e-11	1.08309e-10	8.369e-11	9.7368e-11	9.3851e-11	9.1512e-11	9.0514e-11	5.7528e-11	8.6679e-11	6.4871e-11	1.67397e-10	8.8736e-11	8.9543e-11	3.8856e-11	8.7559e-11	4.6664e-11	5.0219e-11	6.1889e-11	6.2444e-11	3.86705e-10	5.8129e-11	6.6866e-11	2.6445e-11	7.0516e-11	4.2452e-11	6.0454e-11	5.0913e-11	4.3297e-11	3.71092e-10	8.3098e-11	5.2097e-11	1.9791e-11	7.4408e-11	3.9956e-11
2024-05-29T17:57:41.097	3.84864e-09	8.27002e-10	3.97885e-10	2.7457e-10	1.50986e-10	1.03267e-10	1.45275e-10	1.17398e-10	1.61164e-10	1.22049e-10	8.6728e-11	1.12755e-10	9.5879e-11	8.5221e-11	7.2768e-11	7.4701e-11	9.8441e-11	6.8332e-11	1.01344e-10	8.0037e-11	6.9732e-11	2.8623e-11	8.9431e-11	5.5326e-11	8.0329e-11	1.60419e-10	1.27794e-10	1.28957e-10	8.3338e-11	5.5377e-11	5.8497e-11	5.8887e-11	7.5798e-11	7.6479e-11	4.09202e-10	5.8129e-11	2.6227e-11	4.9475e-11	7.9958e-11	4.6504e-11	6.8929e-11	5.7729e-11	1.9363e-11	3.31686e-10	4.3797e-11	3.4105e-11	5.5976e-11	2.8123e-11	5.6506e-11
2024-05-29T17:57:44.556	3.88174e-09	1.06557e-09	6.26706e-10	2.93528e-10	1.7106e-10	1.24656e-10	1.10001e-10	1.23985e-10	9.3048e-11	1.13473e-10	7.7572e-11	1.18153e-10	9.5879e-11	8.0693e-11	2.7504e-11	4.65146e-10	7.1417e-11	1.01864e-10	5.8511e-11	9.2418e-11	8.5404e-11	8.8992e-11	4.6971e-11	1.30283e-10	3.98841e-10	8.4548e-11	1.03877e-10	4.8741e-11	6.0196e-11	4.9531e-11	5.2912e-11	4.6976e-11	6.4416e-11	4.0308e-11	8.9207e-11	2.5996e-11	7.6464e-11	6.7423e-11	6.2506e-11	3.797e-11	4.6828e-11	8.6058e-11	5.4767e-11	7.2877e-11	6.4961e-11	5.9072e-11	2.7988e-11	5.6247e-11	5.2857e-11
2024-05-29T17:57:48.014	3.50628e-09	8.49315e-10	3.47634e-10	3.56023e-10	1.59746e-10	1.50156e-10	1.609e-10	1.37179e-10	1.34461e-10	9.1278e-11	1.2961e-10	8.0508e-11	1.22094e-10	8.3739e-11	2.95371e-10	8.7232e-11	1.04718e-10	5.3418e-11	8.2747e-11	8.6449e-11	4.6488e-11	9.6359e-11	5.5079e-11	4.05533e-10	1.08551e-10	1.20759e-10	1.11983e-10	5.7154e-11	6.5019e-11	4.2895e-11	4.6664e-11	5.6147e-11	4.10134e-10	6.4994e-11	4.0717e-11	4.1103e-11	4.1468e-11	6.202e-11	7.299e-11	3.2883e-11	6.8929e-11	5.0913e-11	5.4767e-11	2.7545e-11	6.1938e-11	2.7847e-11	4.8477e-11	8.6682e-11	2.8253e-11
2024-05-29T17:57:51.473	4.74067e-09	1.09829e-09	5.48557e-10	3.53103e-10	1.67035e-10	1.00273e-10	1.06094e-10	1.41927e-10	1.04641e-10	7.4528e-11	9.0961e-11	7.061e-11	6.8707e-11	5.17656e-10	7.9396e-11	1.01978e-10	1.04718e-10	1.01864e-10	3.975e-11	7.4867e-11	7.5319e-11	7.5729e-11	4.17161e-10	7.6444e-11	1.23085e-10	1.18367e-10	1.38736e-10	5.7154e-11	6.0196e-11	7.6332e-11	6.1098e-11	0	6.9193e-11	7.2105e-11	3.1539e-11	4.8634e-11	7.4181e-11	6.4778e-11	4.2141e-11	6.2967e-11	6.3405e-11	3.333e-11	4.7429e-11	3.3736e-11	5.1821e-11	3.4105e-11	3.4278e-11	4.4467e-11	7.2032e-11
2024-05-29T17:57:54.935	3.80289e-09	8.00742e-10	6.45701e-10	2.61432e-10	5.54298e-10	1.15786e-10	9.9242e-11	1.02964e-10	1.1396e-10	5.0247e-11	6.7179e-11	6.3156e-11	1.06906e-10	6.898e-11	9.7886e-11	8.4274e-11	1.19503e-10	4.2613e-11	7.0736e-11	7.1213e-11	6.3656e-11	6.6102e-11	8.4679e-11	6.6726e-11	1.25344e-10	1.49342e-10	1.25492e-10	6.8931e-11	6.2654e-11	6.3139e-11	4.18867e-10	1.7755e-11	9.1098e-11	4.0308e-11	7.2837e-11	7.1193e-11	7.1825e-11	4.5805e-11	3.7692e-11	4.2452e-11	7.647e-11	4.3029e-11	5.123e-11	2.7545e-11	4.7977e-11	1.9691e-11	3.4278e-11	8.1993e-11	4.4672e-11
2024-05-29T17:57:58.390	4.30135e-09	9.97585e-10	4.88546e-10	5.18489e-10	1.9434e-10	1.03267e-10	1.53745e-10	1.02964e-10	7.653e-11	1.07767e-10	7.2562e-11	7.8944e-11	1.03361e-10	5.9212e-11	5.2666e-11	9.149e-11	7.8233e-11	5.5793e-11	8.4323e-11	6.7361e-11	9.9977e-11	7.2033e-11	4.0678e-11	1.02831e-10	6.9061e-11	1.15926e-10	8.5386e-11	1.04822e-10	5.2131e-11	4.30375e-10	3.5275e-11	9.8857e-11	5.6496e-11	5.4078e-11	2.5752e-11	8.6219e-11	3.709e-11	4.5805e-11	5.3305e-11	4.2452e-11	4.6828e-11	5.0913e-11	4.3297e-11	6.7471e-11	4.7977e-11	3.9382e-11	5.2361e-11	3.28576e-10	4.4672e-11
2024-05-29T17:58:01.852	3.86261e-09	1.43892e-09	3.34343e-10	3.57185e-10	1.41685e-10	1.41808e-10	1.31014e-10	1.21829e-10	1.094e-10	8.703e-11	4.59468e-10	7.061e-11	1.22094e-10	6.3301e-11	4.4913e-11	9.2866e-11	9.5816e-11	8.5226e-11	5.3822e-11	1.13189e-10	1.18522e-10	7.0112e-11	5.9877e-11	7.4601e-11	9.1742e-11	1.25405e-10	1.11983e-10	8.4422e-11	1.04263e-10	6.5523e-11	6.3593e-11	3.551e-11	5.6496e-11	4.0308e-11	5.7583e-11	6.3677e-11	2.58305e-10	5.9134e-11	4.6164e-11	7.1036e-11	6.6225e-11	5.4428e-11	7.245e-11	4.7709e-11	7.8346e-11	5.5694e-11	5.5976e-11	7.9545e-11	5.2857e-11
2024-05-29T17:58:05.307	4.32165e-09	1.25549e-09	5.37429e-10	2.64582e-10	2.55594e-10	1.39643e-10	1.0476e-10	1.00357e-10	1.25646e-10	4.74559e-10	6.5287e-11	8.9315e-11	8.9166e-11	8.0693e-11	4.2013e-11	7.638e-11	1.25738e-10	8.8217e-11	4.8684e-11	5.4185e-11	7.3504e-11	6.8136e-11	8.1357e-11	6.0146e-11	7.8563e-11	1.35277e-10	1.44905e-10	1.1168e-10	8.513e-11	6.3139e-11	5.5775e-11	5.0219e-11	4.7268e-11	7.2105e-11	3.6418e-11	4.00204e-10	4.5426e-11	7.7101e-11	4.6164e-11	2.6849e-11	6.0454e-11	5.4428e-11	5.4767e-11	5.1532e-11	2.17224e-10	3.4105e-11	5.5976e-11	7.7019e-11	6.3176e-11
2024-05-29T17:58:08.765	4.41261e-09	1.47695e-09	3.25182e-10	2.34716e-10	1.79788e-10	1.56125e-10	9.7814e-11	1.00357e-10	8.8848e-11	4.63252e-10	5.9247e-11	1.10522e-10	8.1904e-11	7.252e-11	5.2666e-11	9.2866e-11	9.4476e-11	3.6014e-11	2.68131e-10	9.2418e-11	1.31488e-10	4.0479e-11	2.3486e-11	8.0001e-11	5.0249e-11	1.60419e-10	1.27794e-10	4.5593e-11	8.1506e-11	6.0662e-11	7.2721e-11	7.1021e-11	6.6847e-11	4.0308e-11	8.3445e-11	8.8157e-11	7.1825e-11	2.6445e-11	5.3305e-11	6.0037e-11	6.0454e-11	5.4428e-11	4.7429e-11	6.4599e-11	3.9173e-11	3.4105e-11	4.8477e-11	5.6247e-11	6.626e-11
2024-05-29T17:58:12.223	4.32632e-09	8.83995e-10	5.15624e-10	3.42986e-10	1.83534e-10	9.5607e-11	1.15003e-10	1.13961e-10	5.06348e-10	1.00494e-10	8.527e-11	1.24317e-10	1.23106e-10	5.7059e-11	8.0969e-11	1.06837e-10	1.1292e-10	5.8071e-11	8.5871e-11	8.798e-11	6.9732e-11	6.1833e-11	6.2137e-11	5.7786e-11	9.1742e-11	1.48381e-10	8.3661e-11	7.3112e-11	6.0196e-11	6.0662e-11	4.3203e-11	5.3266e-11	7.5798e-11	4.7693e-11	3.91393e-10	7.3528e-11	7.1825e-11	4.5805e-11	6.2506e-11	7.3529e-11	5.058e-11	4.7136e-11	1.9363e-11	1.04888e-10	5.1821e-11	2.7847e-11	7.1356e-11	3.9773e-11	6.626e-11
2024-05-29T17:58:15.682	4.55673e-09	8.0324e-10	6.17967e-10	2.39088e-10	2.22883e-10	9.7187e-11	1.472e-10	1.20737e-10	4.56957e-10	9.4003e-11	9.6316e-11	1.04732e-10	5.6832e-11	4.7476e-11	5.0215e-11	8.4274e-11	1.4723e-10	4.2613e-11	8.5871e-11	8.0037e-11	8.5404e-11	7.7511e-11	7.2388e-11	6.4606e-11	1.19617e-10	1.54979e-10	1.09348e-10	8.4422e-11	6.7301e-11	7.0047e-11	4.3203e-11	5.6147e-11	1.7866e-11	5.4078e-11	3.76716e-10	7.3528e-11	8.0837e-11	5.6099e-11	8.4283e-11	5.3698e-11	9.5587e-11	6.3822e-11	4.3297e-11	2.50947e-10	7.062e-11	6.5307e-11	4.8477e-11	3.9773e-11	5.6506e-11
2024-05-29T17:58:19.142	3.49666e-09	1.06682e-09	6.6597e-10	2.52568e-10	1.66013e-10	1.23428e-10	1.37309e-10	4.62195e-10	1.11703e-10	9.4003e-11	8.2278e-11	3.8675e-11	5.6832e-11	1.11901e-10	9.659e-11	7.9632e-11	5.9752e-11	7.2029e-11	5.3822e-11	5.6594e-11	6.7768e-11	8.7445e-11	8.3035e-11	9.1368e-11	9.4751e-11	1.09587e-10	1.15823e-10	9.1187e-11	4.915e-11	4.2895e-11	7.688e-11	8.1365e-11	6.9193e-11	7.4324e-11	4.4603e-11	5.8129e-11	4.9066e-11	6.4778e-11	4.6164e-11	4.2452e-11	7.8823e-11	9.8121e-11	3.60172e-10	6.1593e-11	5.5399e-11	7.6262e-11	6.5638e-11	5.6247e-11	7.9912e-11
2024-05-29T17:58:22.598	4.9273e-09	1.0928e-09	5.56757e-10	2.73815e-10	1.33015e-10	1.73678e-10	1.26648e-10	4.76315e-10	5.9708e-11	1.19962e-10	7.5939e-11	1.24317e-10	8.3407e-11	8.223e-11	5.0215e-11	1.13737e-10	8.7468e-11	6.4424e-11	3.975e-11	8.6449e-11	5.1975e-11	1.00521e-10	1.02372e-10	5.0044e-11	7.3011e-11	1.32066e-10	1.09348e-10	4.2211e-11	7.7713e-11	4.6332e-11	3.5275e-11	5.8887e-11	4.3762e-11	5.0986e-11	7.2837e-11	5.5146e-11	7.4181e-11	3.2389e-11	8.2149e-11	7.1036e-11	8.1108e-11	6.9382e-11	3.44748e-10	5.1532e-11	4.7977e-11	4.403e-11	6.2584e-11	6.5955e-11	6.9206e-11
2024-05-29T17:58:26.057	3.5216e-09	1.0687e-09	4.49914e-10	2.29361e-10	1.33015e-10	1.07602e-10	1.17425e-10	1.12792e-10	1.03417e-10	9.5337e-11	9.6316e-11	1.09389e-10	1.08062e-10	8.9521e-11	8.5512e-11	4.92426e-10	4.5168e-11	1.09237e-10	5.3822e-11	6.3274e-11	1.2078e-10	7.3904e-11	7.6102e-11	1.01469e-10	4.06505e-10	1.2878e-10	1.11983e-10	8.2645e-11	4.915e-11	3.0331e-11	7.483e-11	5.0219e-11	9.7855e-11	7.2105e-11	4.4603e-11	7.3528e-11	7.6464e-11	7.9336e-11	8.2149e-11	6.2967e-11	3.3112e-11	0	3.8726e-11	6.7471e-11	2.7699e-11	7.6262e-11	4.8477e-11	3.4444e-11	4.4672e-11
2024-05-29T17:58:29.517	3.6875e-09	1.00359e-09	5.99101e-10	3.47784e-10	1.76927e-10	5.24822e-10	1.51904e-10	1.0799e-10	1.04641e-10	9.7949e-11	1.0622e-10	5.4694e-11	7.5594e-11	7.7527e-11	8.8412e-11	1.00727e-10	1.00999e-10	1.01864e-10	4.8684e-11	4.6209e-11	1.17377e-10	2.8623e-11	1.6607e-11	8.9832e-11	1.17248e-10	1.18367e-10	1.08006e-10	8.0828e-11	8.8606e-11	7.6332e-11	7.483e-11	6.4017e-11	4.7268e-11	1.09649e-10	4.0717e-11	6.0966e-11	5.2454e-11	4.9475e-11	5.3305e-11	8.0548e-11	4.06891e-10	3.333e-11	5.8089e-11	5.509e-11	4.3797e-11	5.9072e-11	4.4253e-11	7.1701e-11	5.9934e-11
2024-05-29T17:58:32.974	3.83287e-09	1.09341e-09	5.82222e-10	2.93528e-10	6.14556e-10	1.01781e-10	1.55565e-10	1.33258e-10	1.07047e-10	1.38521e-10	1.22651e-10	1.4642e-10	1.32816e-10	5.2486e-11	6.9216e-11	9.149e-11	9.4476e-11	6.0264e-11	5.3822e-11	8.4892e-11	6.1498e-11	7.3904e-11	7.7893e-11	5.0044e-11	7.3011e-11	1.3944e-10	9.5082e-11	6.8931e-11	3.8856e-11	6.3139e-11	4.28776e-10	6.1506e-11	9.9472e-11	7.6479e-11	7.9372e-11	7.7988e-11	6.1508e-11	5.2891e-11	5.3305e-11	8.0548e-11	8.3331e-11	7.4528e-11	2.7383e-11	6.4599e-11	7.8346e-11	5.2097e-11	4.4253e-11	7.7019e-11	5.2857e-11
2024-05-29T17:58:36.434	4.7506e-09	9.74555e-10	4.5658e-10	6.07514e-10	1.90806e-10	1.65596e-10	1.29937e-10	1.87751e-10	9.3048e-11	1.16763e-10	6.3337e-11	9.07e-11	7.5594e-11	8.3739e-11	7.2768e-11	7.9632e-11	8.4502e-11	6.6407e-11	8.8885e-11	1.02027e-10	1.02643e-10	6.4002e-11	7.2388e-11	5.0044e-11	8.2057e-11	1.29885e-10	1.14558e-10	3.4465e-11	9.6752e-11	4.16617e-10	6.5993e-11	1.28035e-10	5.6496e-11	5.7004e-11	5.4628e-11	6.0966e-11	1.11271e-10	7.7101e-11	9.6097e-11	5.6956e-11	5.058e-11	3.8486e-11	6.7075e-11	3.8955e-11	6.7849e-11	1.9691e-11	7.6648e-11	3.22502e-10	5.2857e-11
2024-05-29T17:58:39.893	4.19517e-09	1.03955e-09	4.85444e-10	3.1266e-10	1.72052e-10	1.00273e-10	1.59141e-10	7.636e-11	1.3159e-10	8.2564e-11	8.8162e-11	5.18636e-10	7.8812e-11	1.21555e-10	6.5472e-11	7.9632e-11	1.15156e-10	7.8904e-11	5.3822e-11	6.9314e-11	6.7768e-11	5.2258e-11	8.9431e-11	1.00088e-10	7.3011e-11	1.01458e-10	1.30056e-10	6.4479e-11	8.1506e-11	3.5023e-11	8.0825e-11	4.6976e-11	7.9898e-11	5.0986e-11	6.0393e-11	6.6277e-11	9.6364e-11	4.01936e-10	1.8846e-11	7.5941e-11	3.3112e-11	7.9342e-11	3.8726e-11	6.4599e-11	5.8759e-11	7.8763e-11	2.33328e-10	4.8711e-11	2.8253e-11
2024-05-29T17:58:43.351	3.84164e-09	1.10978e-09	4.77917e-10	2.29361e-10	1.7106e-10	1.09008e-10	8.3875e-11	6.9071e-11	9.7067e-11	1.31987e-10	9.3677e-11	1.3304e-10	9.191e-11	6.898e-11	4.4913e-11	9.6876e-11	1.02254e-10	6.8332e-11	5.1318e-11	8.0037e-11	1.03951e-10	7.0112e-11	7.6102e-11	6.8779e-11	4.7375e-11	1.20759e-10	1.06647e-10	2.96982e-10	6.5019e-11	8.9293e-11	6.3593e-11	7.1021e-11	6.1889e-11	5.9786e-11	7.9372e-11	6.6277e-11	3.41454e-10	5.2891e-11	4.6164e-11	6.0037e-11	4.2748e-11	5.0913e-11	1.9363e-11	9.7386e-11	5.5399e-11	3.2949e-10	3.9581e-11	3.9773e-11	4.4672e-11
2024-05-29T17:58:46.809	3.9488e-09	1.07306e-09	6.01617e-10	3.06641e-10	1.86294e-10	1.35207e-10	1.03408e-10	1.16263e-10	9.7067e-11	1.02975e-10	6.902e-11	8.6479e-11	1.14752e-10	1.21555e-10	9.1219e-11	8.1209e-11	7.4903e-11	3.9452e-11	5.6216e-11	1.03327e-10	8.6971e-11	3.6952e-11	3.3214e-11	5.5326e-11	4.7375e-11	1.02857e-10	3.88296e-10	4.2211e-11	1.05701e-10	8.2137e-11	4.9886e-11	6.1506e-11	3.0944e-11	4.7693e-11	4.0717e-11	6.6277e-11	1.03255e-10	3.2389e-11	4.9862e-11	6.8452e-11	4.6828e-11	8.3879e-11	5.123e-11	5.8432e-11	3.9173e-11	6.5307e-11	2.7988e-11	3.9773e-11	5.9934e-11
2024-05-29T17:58:50.271	4.14024e-09	5.99443e-10	4.10591e-10	2.42528e-10	2.02065e-10	1.32936e-10	9.9242e-11	1.20737e-10	4.36727e-10	9.265e-11	1.11966e-10	1.07086e-10	1.251e-10	6.7141e-11	1.07698e-10	8.1209e-11	1.14044e-10	7.3808e-11	8.5871e-11	8.9484e-11	5.6936e-11	7.0112e-11	7.6102e-11	8.3407e-11	9.9093e-11	1.33141e-10	1.11983e-10	7.897e-11	8.8606e-11	6.0662e-11	5.8497e-11	6.4017e-11	6.9193e-11	8.0615e-11	3.93084e-10	4.5026e-11	6.6866e-11	3.7399e-11	5.3305e-11	6.0037e-11	5.4072e-11	4.3029e-11	3.3538e-11	3.52749e-10	7.5857e-11	6.2268e-11	3.9581e-11	5.9659e-11	8.7082e-11
2024-05-29T17:58:53.725	4.93958e-09	9.36103e-10	4.42466e-10	1.92005e-10	2.40505e-10	9.8742e-11	1.08714e-10	5.65368e-10	1.40028e-10	9.7949e-11	1.19546e-10	9.07e-11	6.1047e-11	8.9521e-11	5.7254e-11	9.0093e-11	1.18432e-10	9.3914e-11	6.4912e-11	6.535e-11	9.1512e-11	6.1833e-11	5.5079e-11	1.06813e-10	1.2194e-10	1.19569e-10	1.13278e-10	8.6163e-11	6.5019e-11	4.9531e-11	5.2912e-11	7.5329e-11	5.3597e-11	3.6052e-11	5.7583e-11	6.0966e-11	6.1508e-11	4.5805e-11	4.6164e-11	3.797e-11	3.8235e-11	4.3029e-11	3.59651e-10	5.1532e-11	7.062e-11	3.4105e-11	3.4278e-11	7.4408e-11	7.4751e-11
2024-05-29T17:58:57.185	3.96242e-09	8.10689e-10	8.05956e-10	3.05965e-10	1.33015e-10	1.47081e-10	7.502e-11	1.53586e-10	1.3159e-10	9.5337e-11	1.00145e-10	1.13855e-10	9.969e-11	1.03773e-10	7.2768e-11	4.71376e-10	9.9728e-11	1.23713e-10	8.114e-11	1.0837e-10	7.3504e-11	5.7246e-11	4.9821e-11	6.0146e-11	4.48819e-10	1.2878e-10	1.2893e-10	6.6741e-11	8.1506e-11	8.2137e-11	6.3593e-11	3.9702e-11	5.3597e-11	4.7693e-11	6.8133e-11	1.00682e-10	6.4243e-11	6.7423e-11	2.6653e-11	5.023e-11	4.6828e-11	7.2001e-11	5.123e-11	9.5419e-11	4.3797e-11	3.9382e-11	6.5638e-11	4.8711e-11	9.5811e-11
2024-05-29T17:59:00.643	4.56706e-09	7.64034e-10	5.00762e-10	3.06641e-10	1.77886e-10	6.9821e-11	1.57363e-10	1.0921e-10	1.41835e-10	2.2471e-11	9.2329e-11	8.9315e-11	8.0373e-11	6.129e-11	7.448e-11	4.69759e-10	1.3456e-10	7.7242e-11	5.6216e-11	6.1129e-11	6.3656e-11	1.6525e-11	8.1357e-11	1.09387e-10	4.24401e-10	1.3633e-10	9.3536e-11	4.8741e-11	1.02804e-10	3.0331e-11	4.6664e-11	9.0534e-11	3.9949e-11	1.00365e-10	5.1504e-11	5.8129e-11	5.5636e-11	5.9134e-11	5.9597e-11	7.3529e-11	4.2748e-11	7.6973e-11	8.215e-11	4.7709e-11	5.5399e-11	4.8232e-11	3.4278e-11	5.2614e-11	8.2371e-11
2024-05-29T17:59:04.101	4.4415e-09	1.05232e-09	4.1206e-10	2.90692e-10	2.56922e-10	8.3713e-11	5.02129e-10	1.50095e-10	8.7404e-11	1.27115e-10	7.427e-11	1.2827e-10	1.251e-10	8.0693e-11	5.7254e-11	4.79908e-10	9.3116e-11	7.2029e-11	5.3822e-11	5.4185e-11	1.26247e-10	7.3904e-11	3.7134e-11	9.4364e-11	2.58401e-10	1.09587e-10	1.11983e-10	5.9696e-11	9.83e-11	5.2535e-11	6.3593e-11	9.0534e-11	7.3662e-11	4.7693e-11	6.3079e-11	8.6219e-11	7.1825e-11	6.202e-11	4.6164e-11	8.0548e-11	6.0454e-11	1.01825e-10	5.8089e-11	4.7709e-11	8.3098e-11	3.9382e-11	3.4278e-11	4.4467e-11	2.8253e-11
2024-05-29T17:59:07.559	4.06309e-09	1.1933e-09	6.11084e-10	1.9415e-10	2.25161e-10	1.17094e-10	1.1622e-10	1.39097e-10	8.8848e-11	8.703e-11	8.6728e-11	7.4056e-11	1.19004e-10	1.14117e-10	7.448e-11	1.10341e-10	1.32651e-10	8.8217e-11	9.4625e-11	1.07132e-10	9.9977e-11	8.0958e-11	7.4268e-11	9.5827e-11	1.2422e-10	1.54054e-10	1.18315e-10	7.5115e-11	9.1951e-11	5.5377e-11	6.3593e-11	5.6147e-11	4.35059e-10	5.0986e-11	4.0717e-11	4.5026e-11	6.939e-11	4.5805e-11	4.9862e-11	6.2967e-11	5.058e-11	4.7136e-11	4.3297e-11	3.3736e-11	4.3797e-11	7.0996e-11	6.2584e-11	6.5955e-11	2.8253e-11
2024-05-29T17:59:11.019	3.72959e-09	6.15929e-10	4.48569e-10	2.1635e-10	1.52109e-10	5.40829e-10	1.19797e-10	1.0799e-10	1.24631e-10	7.4528e-11	7.427e-11	1.02324e-10	6.305e-11	6.129e-11	5.2666e-11	9.0093e-11	8.5997e-11	1.28849e-10	7.6116e-11	1.10806e-10	5.6936e-11	6.4002e-11	4.0678e-11	5.7786e-11	4.4316e-11	1.60419e-10	1.50822e-10	6.8931e-11	4.5975e-11	4.2895e-11	3.5275e-11	4.06436e-10	6.1889e-11	9.5386e-11	3.6418e-11	6.6277e-11	6.939e-11	5.6099e-11	3.7692e-11	7.3529e-11	6.3405e-11	6.0852e-11	5.4767e-11	8.7105e-11	8.0757e-11	3.4105e-11	2.7988e-11	7.1701e-11	6.626e-11
2024-05-29T17:59:14.477	3.81349e-09	1.19498e-09	5.37991e-10	2.70006e-10	1.61862e-10	1.04732e-10	1.342e-10	1.57e-10	1.23606e-10	1.16763e-10	9.2329e-11	1.16024e-10	7.2232e-11	4.187e-11	8.0969e-11	1.08017e-10	1.18432e-10	3.2212e-11	7.4366e-11	8.4892e-11	7.7092e-11	5.9583e-11	4.0678e-11	7.4601e-11	8.8631e-11	1.32066e-10	8.19e-11	9.8994e-11	9.5178e-11	3.9157e-11	7.8877e-11	7.1021e-11	6.4416e-11	5.0986e-11	9.9736e-11	4.1103e-11	4.9066e-11	4.9475e-11	7.5385e-11	3.87224e-10	5.4072e-11	7.2001e-11	3.3538e-11	1.9477e-11	4.3797e-11	2.7847e-11	4.8477e-11	8.8934e-11	3.0885e-10
2024-05-29T17:59:17.935	3.93e-09	9.77293e-10	5.89442e-10	2.28456e-10	4.95642e-10	1.46042e-10	1.0476e-10	1.74585e-10	8.1368e-11	9.1278e-11	9.3677e-11	9.9858e-11	1.13664e-10	9.0909e-11	9.2591e-11	1.12616e-10	7.8233e-11	6.6407e-11	8.8885e-11	8.6449e-11	1.17377e-10	6.6102e-11	7.0457e-11	9.7268e-11	7.6757e-11	1.35277e-10	1.11983e-10	1.14308e-10	7.3725e-11	6.0662e-11	4.11751e-10	6.1506e-11	9.2833e-11	4.0308e-11	7.0524e-11	7.5791e-11	4.1468e-11	5.9134e-11	5.6539e-11	6.5767e-11	7.8823e-11	6.666e-11	6.422e-11	5.8432e-11	4.3797e-11	7.0996e-11	4.4253e-11	7.4408e-11	3.25831e-10
2024-05-29T17:59:21.394	3.88174e-09	8.65672e-10	5.64303e-10	3.15952e-10	1.34288e-10	1.35207e-10	1.03408e-10	1.3226e-10	9.7067e-11	1.30061e-10	7.5939e-11	8.7909e-11	6.305e-11	6.129e-11	1.07698e-10	1.00727e-10	6.7752e-11	7.2029e-11	6.885e-11	1.02027e-10	1.02643e-10	5.9583e-11	5.7528e-11	8.5059e-11	5.0249e-11	1.48381e-10	1.11983e-10	9.5947e-11	4.915e-11	6.3139e-11	2.4943e-11	3.9702e-11	6.1889e-11	6.9814e-11	2.5752e-11	4.5026e-11	7.6464e-11	1.87e-11	3.65441e-10	6.5767e-11	5.058e-11	6.0852e-11	6.1231e-11	3.8955e-11	0	5.2097e-11	4.4253e-11	3.58505e-10	5.9934e-11
2024-05-29T17:59:24.852	3.88521e-09	9.50266e-10	6.01115e-10	2.40814e-10	9.0366e-11	1.14462e-10	1.54657e-10	1.01669e-10	1.094e-10	4.4942e-11	9.6316e-11	1.23313e-10	7.722e-11	7.0772e-11	5.7254e-11	5.7423e-11	1.19503e-10	5.0932e-11	7.2574e-11	6.535e-11	8.5404e-11	4.9576e-11	6.2137e-11	8.827e-11	8.5407e-11	1.14687e-10	1.09348e-10	7.3112e-11	6.2654e-11	9.5916e-11	6.1098e-11	7.9404e-11	5.0532e-11	1.00365e-10	6.0393e-11	5.5146e-11	6.1508e-11	3.40725e-10	4.2141e-11	3.2883e-11	3.3112e-11	6.9382e-11	3.8726e-11	6.7471e-11	6.4961e-11	5.5694e-11	3.29382e-10	7.9545e-11	4.8936e-11
2024-05-29T17:59:28.312	5.40432e-09	9.05641e-10	4.61188e-10	2.1635e-10	2.09505e-10	2.01305e-10	8.045e-11	1.62801e-10	8.2918e-11	7.4528e-11	8.9572e-11	9.3408e-11	1.11457e-10	7.252e-11	7.9396e-11	9.0093e-11	9.0336e-11	9.111e-11	5.6216e-11	7.6629e-11	8.8511e-11	6.8136e-11	8.3035e-11	2.8893e-11	7.3011e-11	1.09587e-10	1.11983e-10	8.0828e-11	1.13949e-10	4.2895e-11	4.3203e-11	6.1506e-11	5.3597e-11	3.6052e-11	6.3079e-11	5.1992e-11	3.98614e-10	5.6099e-11	4.2141e-11	4.2452e-11	3.3112e-11	3.8486e-11	8.215e-11	5.509e-11	3.9173e-11	3.41623e-10	4.8477e-11	6.8888e-11	7.7374e-11
2024-05-29T17:59:31.770	4.34496e-09	7.18997e-10	5.62157e-10	2.07556e-10	1.6805e-10	1.97484e-10	1.17425e-10	1.35233e-10	9.9655e-11	4.80638e-10	8.527e-11	8.7909e-11	1.10337e-10	8.5221e-11	5.9415e-11	8.7232e-11	1.1735e-10	9.111e-11	9.18e-11	6.9314e-11	9.7237e-11	5.2258e-11	6.6428e-11	8.9832e-11	9.4751e-11	9.1061e-11	1.26648e-10	9.4387e-11	7.5745e-11	7.0047e-11	7.2721e-11	8.5151e-11	7.1463e-11	2.5493e-11	5.7583e-11	3.59272e-10	7.6464e-11	6.202e-11	7.5385e-11	6.2967e-11	1.9117e-11	6.0852e-11	4.3297e-11	7.2877e-11	3.70075e-10	4.403e-11	6.2584e-11	3.9773e-11	6.9206e-11
2024-05-29T17:59:35.229	3.5766e-09	1.05802e-09	7.12861e-10	2.84935e-10	1.53223e-10	8.9005e-11	1.27754e-10	1.12792e-10	1.54715e-10	8.9884e-11	8.2278e-11	9.3408e-11	8.4883e-11	6.898e-11	5.2666e-11	5.517e-11	1.07125e-10	5.5793e-11	1.0517e-10	6.535e-11	9.0024e-11	4.0479e-11	5.9877e-11	5.0044e-11	9.02e-11	1.2426e-10	9.1964e-11	9.4387e-11	6.5019e-11	8.0249e-11	6.1098e-11	7.5329e-11	5.9254e-11	5.4078e-11	4.22753e-10	4.5026e-11	7.1825e-11	5.2891e-11	5.9597e-11	6.0037e-11	6.3405e-11	1.9243e-11	6.9814e-11	3.68013e-10	5.1821e-11	3.9382e-11	4.4253e-11	4.8711e-11	2.8253e-11
2024-05-29T17:59:38.686	4.68208e-09	1.19442e-09	4.61188e-10	1.96272e-10	1.36798e-10	7.197e-11	1.25532e-10	2.72904e-10	1.03417e-10	1.07767e-10	1.1084e-10	8.0508e-11	1.08062e-10	7.4227e-11	7.2768e-11	5.7423e-11	1.31686e-10	7.3808e-11	1.6228e-11	7.3063e-11	7.8825e-11	4.0479e-11	8.4679e-11	7.2713e-11	7.4907e-11	1.2878e-10	1.02463e-10	6.6741e-11	8.6885e-11	4.2895e-11	5.8497e-11	7.5329e-11	9.621e-11	5.9786e-11	6.0393e-11	3.6764e-11	6.939e-11	6.9968e-11	7.7705e-11	5.3698e-11	5.058e-11	6.666e-11	3.8726e-11	5.509e-11	3.9173e-11	0	5.2361e-11	3.4444e-11	4.8936e-11
2024-05-29T17:59:42.145	4.58912e-09	1.13064e-09	4.81695e-10	2.59843e-10	1.76927e-10	1.35207e-10	1.61772e-10	6.7125e-11	1.19416e-10	8.8469e-11	8.3787e-11	6.5099e-11	7.8812e-11	1.21555e-10	8.2511e-11	4.37031e-10	9.9728e-11	7.0205e-11	4.59e-11	1.03327e-10	5.9261e-11	3.6952e-11	8.3035e-11	1.13139e-10	4.1267e-10	1.10884e-10	8.8736e-11	8.0828e-11	5.7633e-11	6.0662e-11	7.055e-11	3.551e-11	9.1098e-11	4.4155e-11	5.1504e-11	6.8779e-11	7.8681e-11	3.7399e-11	6.5285e-11	6.0037e-11	9.1684e-11	5.7729e-11	6.9814e-11	8.2635e-11	7.8346e-11	3.9382e-11	6.5638e-11	4.8711e-11	4.8936e-11
2024-05-29T17:59:45.603	3.87132e-09	1.01813e-09	4.45188e-10	2.7457e-10	1.55428e-10	1.5317e-10	1.56466e-10	1.47423e-10	1.1396e-10	1.53232e-10	9.3677e-11	8.2042e-11	1.03361e-10	1.03773e-10	4.63772e-10	6.9421e-11	1.18432e-10	8.8217e-11	6.285e-11	6.1129e-11	6.5744e-11	6.8136e-11	8.3035e-11	4.11324e-10	6.2672e-11	1.15926e-10	8.8736e-11	6.6741e-11	7.5745e-11	7.4296e-11	6.8309e-11	7.7393e-11	1.02631e-10	6.7448e-11	4.4603e-11	6.0966e-11	5.2454e-11	4.9475e-11	6.2506e-11	3.797e-11	4.6828e-11	3.8486e-11	6.7075e-11	3.3736e-11	3.3925e-11	3.4105e-11	6.8557e-11	5.6247e-11	7.4751e-11
2024-05-29T17:59:49.066	4.39886e-09	1.15743e-09	5.0795e-10	2.18256e-10	1.25106e-10	5.65078e-10	1.69419e-10	1.0921e-10	1.12838e-10	1.0659e-10	6.5287e-11	7.5721e-11	1.3921e-10	7.252e-11	1.01677e-10	1.32294e-10	1.36442e-10	6.6407e-11	7.4366e-11	8.1687e-11	9.4418e-11	5.7246e-11	3.7134e-11	8.0001e-11	7.8563e-11	1.15926e-10	1.25492e-10	9.1187e-11	7.3725e-11	7.4296e-11	7.2721e-11	3.65172e-10	7.9898e-11	4.7693e-11	4.8177e-11	4.5026e-11	5.2454e-11	5.6099e-11	5.6539e-11	6.2967e-11	8.9668e-11	5.7729e-11	3.3538e-11	5.1532e-11	5.1821e-11	8.1187e-11	5.9372e-11	8.6682e-11	5.9934e-11
2024-05-29T17:59:52.527	3.50436e-09	1.158e-09	4.5658e-10	2.50096e-10	5.88175e-10	1.01781e-10	1.4234e-10	9.7681e-11	8.2918e-11	9.5337e-11	6.7179e-11	1.20244e-10	1.50364e-10	7.4227e-11	9.7886e-11	5.9591e-11	9.0336e-11	6.2378e-11	7.6116e-11	9.2418e-11	6.1498e-11	4.3722e-11	4.0678e-11	9.5827e-11	8.8631e-11	1.38411e-10	1.06647e-10	3.8533e-11	7.9632e-11	8.579e-11	9.3329e-11	6.1506e-11	6.6847e-11	3.6052e-11	8.1434e-11	7.7988e-11	8.0837e-11	4.1814e-11	5.9597e-11	4.01842e-10	1.9117e-11	6.3822e-11	5.8089e-11	7.2877e-11	9.5954e-11	6.8211e-11	5.2361e-11	3.9773e-11	3.60158e-10
2024-05-29T17:59:55.979	4.17425e-09	1.02597e-09	5.60003e-10	2.63798e-10	1.82605e-10	1.57098e-10	1.60023e-10	1.38141e-10	1.04641e-10	1.11226e-10	1.02618e-10	8.3547e-11	1.31878e-10	7.9126e-11	6.737e-11	7.9632e-11	8.4502e-11	8.9675e-11	8.114e-11	7.4867e-11	1.09024e-10	8.0958e-11	4.3938e-11	7.0773e-11	6.4871e-11	9.8599e-11	8.7077e-11	5.7154e-11	5.7633e-11	6.3139e-11	5.8497e-11	8.3279e-11	3.0944e-11	4.0308e-11	7.9372e-11	5.1992e-11	7.8681e-11	7.7101e-11	3.83464e-10	5.023e-11	7.647e-11	4.7136e-11	3.8726e-11	5.1532e-11	8.0757e-11	6.8211e-11	5.2361e-11	3.19421e-10	1.9978e-11
2024-05-29T17:59:59.438	4.43999e-09	1.02662e-09	5.68038e-10	3.48379e-10	1.74993e-10	1.46042e-10	1.44304e-10	1.19634e-10	1.094e-10	6.926e-11	9.2329e-11	8.3547e-11	7.722e-11	9.0909e-11	5.9415e-11	4.2137e-11	8.5997e-11	1.00583e-10	7.6116e-11	8.6449e-11	4.76646e-10	3.6952e-11	8.9431e-11	6.6726e-11	1.04602e-10	1.3098e-10	9.3536e-11	6.6741e-11	5.2131e-11	7.4296e-11	6.1098e-11	7.9404e-11	2.5266e-11	3.6052e-11	4.8177e-11	7.1193e-11	8.0837e-11	4.1814e-11	6.2506e-11	5.3698e-11	6.8929e-11	5.4428e-11	5.8089e-11	3.3736e-11	7.8346e-11	3.4105e-11	9.2826e-11	2.8123e-11	6.3176e-11
2024-05-29T18:00:02.899	4.07137e-09	7.56125e-10	5.82222e-10	3.00501e-10	1.96948e-10	1.04732e-10	9.3399e-11	9.6314e-11	8.7404e-11	1.11226e-10	9.5006e-11	9.9858e-11	1.10337e-10	8.6678e-11	5.5007e-11	6.5666e-11	1.20566e-10	5.5793e-11	1.12431e-10	9.6653e-11	7.3504e-11	6.4002e-11	5.7528e-11	7.0773e-11	9.4751e-11	1.14687e-10	8.5386e-11	3.8533e-11	4.00428e-10	7.4296e-11	6.1098e-11	7.3207e-11	5.6496e-11	7.8574e-11	6.0393e-11	3.6764e-11	3.2121e-11	3.85505e-10	4.9862e-11	5.6956e-11	6.3405e-11	6.666e-11	2.7383e-11	7.2877e-11	7.062e-11	5.5694e-11	3.43925e-10	6.8888e-11	7.7374e-11
2024-05-29T18:00:06.353	3.99289e-09	1.18488e-09	5.47454e-10	2.72298e-10	2.35501e-10	9.7187e-11	1.55565e-10	1.04244e-10	1.30619e-10	5.41641e-10	9.2329e-11	1.12755e-10	9.4574e-11	8.223e-11	5.7254e-11	9.4221e-11	9.0336e-11	4.5555e-11	8.8885e-11	1.27597e-10	8.052e-11	5.4809e-11	8.4679e-11	7.0773e-11	9.3259e-11	1.04238e-10	8.8736e-11	7.897e-11	8.513e-11	4.9531e-11	4.6664e-11	6.1506e-11	6.6847e-11	5.4078e-11	3.6418e-11	1.72438e-10	2.6227e-11	3.7399e-11	4.2141e-11	9.105e-11	6.0454e-11	5.4428e-11	3.3538e-11	3.8955e-11	3.3925e-11	5.2097e-11	0	7.4408e-11	4.8936e-11
2024-05-29T18:00:09.812	3.39308e-09	1.11758e-09	4.01664e-10	3.11997e-10	1.89912e-10	1.06177e-10	1.29937e-10	1.87751e-10	1.36342e-10	8.703e-11	9.0961e-11	8.6479e-11	1.11457e-10	1.08492e-10	4.2013e-11	8.4274e-11	1.02254e-10	4.33969e-10	9.8711e-11	1.17811e-10	1.06518e-10	4.9576e-11	3.7134e-11	8.9832e-11	6.6999e-11	1.19569e-10	9.1964e-11	6.2133e-11	6.2654e-11	5.808e-11	5.5775e-11	5.8887e-11	7.3662e-11	3.1222e-11	8.3445e-11	4.8634e-11	5.8645e-11	5.6099e-11	8.8397e-11	6.8452e-11	7.4041e-11	6.666e-11	6.7075e-11	8.49e-11	4.3797e-11	6.8211e-11	3.4278e-11	4.8711e-11	0
2024-05-29T18:00:13.271	3.38712e-09	1.0466e-09	5.10915e-10	2.23877e-10	1.44064e-10	1.14462e-10	1.55565e-10	1.54447e-10	1.07047e-10	9.1278e-11	7.9172e-11	9.2064e-11	7.722e-11	5.482e-11	5.7254e-11	9.0093e-11	8.5997e-11	5.5793e-11	9.8711e-11	6.7361e-11	6.7768e-11	7.3904e-11	5.5079e-11	7.8243e-11	1.11105e-10	4.21724e-10	7.2453e-11	1.156e-10	5.2131e-11	7.8315e-11	2.4943e-11	6.6434e-11	9.9472e-11	4.7693e-11	4.0717e-11	8.0125e-11	4.9066e-11	5.6099e-11	5.6539e-11	4.2452e-11	5.4072e-11	4.7136e-11	3.8726e-11	4.7709e-11	4.3797e-11	6.2268e-11	6.2584e-11	6.2886e-11	5.9934e-11
2024-05-29T18:00:16.728	3.94539e-09	7.95721e-10	5.16795e-10	2.7457e-10	2.33324e-10	1.09008e-10	1.18617e-10	1.36209e-10	1.094e-10	9.5337e-11	8.2278e-11	1.58676e-10	1.19004e-10	9.7553e-11	9.3943e-11	6.3705e-11	4.97098e-10	7.3808e-11	9.6006e-11	5.1663e-11	1.03951e-10	5.9583e-11	5.7528e-11	9.1368e-11	8.8631e-11	1.58626e-10	1.11983e-10	4.2211e-11	6.7301e-11	6.0662e-11	8.2727e-11	6.1506e-11	7.9898e-11	8.2606e-11	9.1046e-11	8.4237e-11	7.8681e-11	4.1814e-11	6.2506e-11	5.3698e-11	6.6225e-11	6.3822e-11	4.7429e-11	5.509e-11	7.5857e-11	2.7847e-11	6.2584e-11	7.4408e-11	7.2032e-11
2024-05-29T18:00:20.189	4.8999e-09	1.23023e-09	5.70691e-10	2.89978e-10	1.29121e-10	1.39643e-10	1.70247e-10	8.4594e-11	8.5935e-11	6.3558e-11	1.08555e-10	8.6479e-11	6.499e-11	7.7527e-11	3.5507e-11	5.06597e-10	9.0336e-11	8.6734e-11	6.072e-11	1.26548e-10	5.4512e-11	6.1833e-11	6.4318e-11	7.6444e-11	4.15381e-10	1.47415e-10	1.25492e-10	6.6741e-11	9.6752e-11	6.0662e-11	7.055e-11	3.9702e-11	5.3597e-11	5.4078e-11	5.1504e-11	7.7988e-11	6.1508e-11	6.9968e-11	5.6539e-11	2.6849e-11	4.2748e-11	3.333e-11	1.9363e-11	4.3553e-11	8.0757e-11	3.4105e-11	5.2361e-11	6.5955e-11	6.3176e-11
2024-05-29T18:00:23.646	4.46569e-09	1.30505e-09	6.47103e-10	2.6692e-10	1.29121e-10	1.23428e-10	1.13773e-10	1.31254e-10	9.4407e-11	8.102e-11	5.2517e-11	1.03535e-10	1.00929e-10	4.7476e-11	4.88656e-10	1.22332e-10	8.1428e-11	5.3418e-11	5.8511e-11	9.2418e-11	5.4512e-11	7.0112e-11	7.2388e-11	4.06219e-10	5.0249e-11	1.08274e-10	9.0364e-11	3.8533e-11	8.1506e-11	5.5377e-11	4.3203e-11	3.9702e-11	3.5731e-11	5.4078e-11	5.1504e-11	6.6277e-11	6.6866e-11	8.151e-11	3.2643e-11	6.5767e-11	5.4072e-11	6.666e-11	9.4859e-11	8.49e-11	2.7699e-11	5.9072e-11	4.4253e-11	1.9886e-11	7.2032e-11
2024-05-29T18:00:27.105	3.98614e-09	1.03117e-09	3.0306e-10	2.71536e-10	2.00374e-10	1.31785e-10	1.07412e-10	1.45614e-10	1.16173e-10	6.5514e-11	8.2278e-11	7.061e-11	1.09205e-10	4.70517e-10	8.8412e-11	9.149e-11	1.00999e-10	1.10418e-10	5.3822e-11	6.9314e-11	7.5319e-11	4.6741e-11	4.33055e-10	1.00088e-10	1.00499e-10	1.09587e-10	1.64687e-10	7.5115e-11	8.513e-11	6.5523e-11	3.9439e-11	5.3266e-11	1.04174e-10	4.7693e-11	5.1504e-11	5.8129e-11	3.2121e-11	6.202e-11	3.2643e-11	5.023e-11	3.8235e-11	4.3029e-11	5.8089e-11	6.4599e-11	8.3098e-11	8.3541e-11	6.2584e-11	7.1701e-11	8.9344e-11
2024-05-29T18:00:30.564	3.27186e-09	1.03698e-09	7.60431e-10	3.13321e-10	6.08715e-10	1.69236e-10	9.6365e-11	9.9028e-11	7.3127e-11	8.102e-11	1.0622e-10	1.23313e-10	4.9845e-11	7.0772e-11	1.13401e-10	1.00727e-10	1.0948e-10	6.6407e-11	7.4366e-11	5.6594e-11	7.5319e-11	6.6102e-11	6.2137e-11	1.08108e-10	7.3011e-11	1.33141e-10	1.38736e-10	5.1698e-11	6.9508e-11	2.4765e-11	4.17752e-10	7.7393e-11	7.9898e-11	6.2444e-11	7.7255e-11	9.5516e-11	5.5636e-11	4.9475e-11	6.7951e-11	1.07397e-10	6.3405e-11	6.0852e-11	5.123e-11	4.7709e-11	3.3925e-11	4.403e-11	7.6648e-11	3.4444e-11	3.4603e-11
2024-05-29T18:00:34.027	3.19903e-09	1.08298e-09	4.10591e-10	2.01479e-10	1.50986e-10	1.57098e-10	7.502e-11	1.16263e-10	1.33511e-10	7.4528e-11	8.527e-11	8.0508e-11	9.3252e-11	7.0772e-11	7.9396e-11	8.5766e-11	9.4476e-11	5.5793e-11	9.0354e-11	9.3851e-11	1.17377e-10	5.4809e-11	6.4318e-11	7.8243e-11	6.2672e-11	1.38411e-10	1.08006e-10	4.5593e-11	4.915e-11	4.2895e-11	7.2721e-11	7.9404e-11	1.08673e-10	8.2606e-11	5.7583e-11	4.5026e-11	6.1508e-11	2.6445e-11	3.7266e-10	8.0548e-11	7.1531e-11	7.2001e-11	5.8089e-11	7.2877e-11	6.7849e-11	3.9382e-11	7.405e-11	3.50135e-10	5.2857e-11
2024-05-29T18:00:37.487	3.54827e-09	1.25708e-09	4.4722e-10	2.28456e-10	2.03742e-10	1.27077e-10	9.9242e-11	1.15118e-10	1.17264e-10	8.703e-11	1.09703e-10	1.09389e-10	1.06906e-10	4.187e-11	9.2591e-11	5.9591e-11	9.4476e-11	5.5793e-11	4.8684e-11	1.00711e-10	1.2078e-10	1.03202e-10	4.6971e-11	7.2713e-11	1.08551e-10	9.8599e-11	1.08006e-10	6.4479e-11	3.7391e-10	5.5377e-11	6.8309e-11	5.3266e-11	6.4416e-11	6.4994e-11	4.4603e-11	4.8634e-11	4.5426e-11	4.01936e-10	5.3305e-11	8.2755e-11	5.058e-11	5.7729e-11	2.7383e-11	2.7545e-11	6.1938e-11	5.9072e-11	3.17268e-10	3.4444e-11	5.9934e-11
2024-05-29T18:00:40.941	4.70932e-09	7.62283e-10	8.02198e-10	2.63798e-10	2.46099e-10	1.4394e-10	1.32081e-10	1.37179e-10	9.5746e-11	7.4528e-11	1.35289e-10	1.16024e-10	8.3407e-11	9.3623e-11	6.15e-11	6.5666e-11	3.9117e-11	8.6734e-11	4.5031e-10	9.8024e-11	1.2078e-10	5.2258e-11	4.3938e-11	7.0773e-11	7.1063e-11	1.42483e-10	1.13278e-10	3.96725e-10	5.4951e-11	7.2203e-11	3.9439e-11	6.1506e-11	1.7866e-11	6.4994e-11	5.1504e-11	8.0125e-11	6.939e-11	3.7399e-11	4.6164e-11	6.8452e-11	6.8929e-11	5.7729e-11	0	4.7709e-11	6.7849e-11	4.8232e-11	3.9581e-11	3.4444e-11	3.9956e-11
2024-05-29T18:00:44.404	3.63996e-09	9.77293e-10	3.28877e-10	2.4592e-10	1.9781e-10	9.7187e-11	1.46241e-10	1.13961e-10	4.95967e-10	1.08932e-10	9.2329e-11	5.4694e-11	6.1047e-11	6.129e-11	1.01677e-10	8.2756e-11	8.5997e-11	8.9675e-11	5.3822e-11	1.13189e-10	8.218e-11	5.4809e-11	7.4268e-11	7.8243e-11	1.00499e-10	1.6654e-10	1.19541e-10	5.1698e-11	3.0098e-11	6.5523e-11	6.8309e-11	8.1365e-11	5.6496e-11	3.6052e-11	3.96025e-10	3.6764e-11	6.6866e-11	5.9134e-11	7.299e-11	5.3698e-11	7.647e-11	3.8486e-11	6.7075e-11	5.8432e-11	7.3286e-11	3.9382e-11	5.9372e-11	5.9659e-11	7.2032e-11
2024-05-29T18:00:47.858	3.85913e-09	1.04787e-09	6.79444e-10	2.40814e-10	1.46398e-10	1.29452e-10	8.7165e-11	1.17398e-10	1.40028e-10	5.729e-11	8.3787e-11	1.03535e-10	1.09205e-10	6.5249e-11	1.06521e-10	6.5666e-11	4.7828e-10	6.6407e-11	5.8511e-11	8.1687e-11	9.4418e-11	4.0479e-11	7.0457e-11	4.4135e-11	5.8023e-11	1.3098e-10	9.6603e-11	6.6741e-11	3.0098e-11	9.9061e-11	5.5775e-11	5.6147e-11	8.9329e-11	6.9814e-11	6.0393e-11	6.0966e-11	6.6866e-11	6.9968e-11	4.2141e-11	8.0548e-11	3.8235e-11	2.7214e-11	7.9836e-11	6.7471e-11	7.3286e-11	5.9072e-11	4.8477e-11	5.2614e-11	4.8936e-11
2024-05-29T18:00:51.320	3.24292e-09	7.21779e-10	4.52592e-10	2.79059e-10	1.04346e-10	1.75424e-10	4.97343e-10	1.45614e-10	1.40028e-10	6.926e-11	7.5939e-11	8.6479e-11	8.6334e-11	8.3739e-11	9.7886e-11	6.5666e-11	5.0499e-11	4.5555e-11	7.0736e-11	8.3305e-11	8.6971e-11	9.4932e-11	7.4268e-11	1.21442e-10	8.3749e-11	1.27665e-10	1.19541e-10	5.1698e-11	4.915e-11	5.2535e-11	5.8497e-11	5.6147e-11	6.6847e-11	5.0986e-11	5.4628e-11	5.5146e-11	5.2454e-11	6.202e-11	4.9862e-11	6.8452e-11	9.3656e-11	3.52207e-10	5.4767e-11	3.3736e-11	6.4961e-11	4.8232e-11	4.4253e-11	5.2614e-11	0
2024-05-29T18:00:54.773	4.22714e-09	9.88843e-10	4.80439e-10	2.39952e-10	2.02065e-10	1.67426e-10	1.11272e-10	1.27149e-10	1.43619e-10	1.26108e-10	5.7091e-11	8.3547e-11	1.12566e-10	4.476e-11	4.69715e-10	6.9421e-11	1.00999e-10	4.2613e-11	8.2747e-11	4.3225e-11	1.01319e-10	8.0958e-11	7.4268e-11	4.35956e-10	9.622e-11	1.2878e-10	1.09348e-10	5.9696e-11	7.7713e-11	8.0249e-11	4.6664e-11	8.8776e-11	7.7875e-11	4.4155e-11	6.0393e-11	6.3677e-11	1.23015e-10	4.5805e-11	3.2643e-11	8.9049e-11	6.0454e-11	5.0913e-11	6.7075e-11	3.8955e-11	3.3925e-11	4.403e-11	4.8477e-11	3.4444e-11	3.4603e-11
2024-05-29T18:00:58.233	3.66202e-09	1.12353e-09	5.09731e-10	2.61432e-10	1.74993e-10	5.24822e-10	1.59141e-10	1.37179e-10	1.30619e-10	6.3558e-11	7.9172e-11	1.08243e-10	1.04556e-10	8.0693e-11	8.5512e-11	9.5558e-11	7.4903e-11	7.5544e-11	5.1318e-11	8.3305e-11	8.052e-11	9.3482e-11	4.3938e-11	6.8779e-11	7.8563e-11	1.02857e-10	1.10673e-10	6.6741e-11	7.9632e-11	7.0047e-11	5.5775e-11	4.07985e-10	7.9898e-11	7.4324e-11	0	6.3677e-11	4.9066e-11	4.5805e-11	6.7951e-11	1.05705e-10	1.06441e-10	3.333e-11	6.7075e-11	3.8955e-11	6.1938e-11	4.8232e-11	0	5.2614e-11	5.6506e-11
2024-05-29T18:01:01.690	3.80289e-09	9.05641e-10	4.47895e-10	2.2295e-10	1.23739e-10	8.9005e-11	1.71072e-10	1.82744e-10	1.43619e-10	1.00494e-10	6.902e-11	7.061e-11	1.17955e-10	4.60837e-10	7.1014e-11	1.2741e-10	1.32651e-10	5.0932e-11	8.5871e-11	9.0963e-11	8.3808e-11	4.9576e-11	6.4318e-11	9.2878e-11	7.8563e-11	9.7138e-11	1.23146e-10	9.2801e-11	7.5745e-11	9.2663e-11	5.5775e-11	8.1365e-11	7.3662e-11	5.7004e-11	9.2849e-11	5.1992e-11	1.8545e-11	5.6099e-11	4.9862e-11	3.45927e-10	5.7352e-11	6.9382e-11	7.9836e-11	6.4599e-11	6.4961e-11	2.7847e-11	3.4278e-11	3.9773e-11	8.7082e-11
2024-05-29T18:01:05.149	4.21917e-09	1.12413e-09	5.80663e-10	2.89978e-10	1.47567e-10	1.34076e-10	9.9242e-11	1.13961e-10	9.4407e-11	8.4079e-11	5.7091e-11	1.20244e-10	4.4191e-10	1.00087e-10	1.10015e-10	9.4221e-11	9.0336e-11	4.5555e-11	6.885e-11	8.4892e-11	8.8511e-11	4.36911e-10	5.5079e-11	1.27042e-10	7.3011e-11	1.37374e-10	9.9577e-11	7.3112e-11	6.7301e-11	7.0047e-11	3.5275e-11	4.6976e-11	5.0532e-11	5.4078e-11	8.3445e-11	6.0966e-11	6.4243e-11	5.6099e-11	4.6164e-11	6.2967e-11	6.3405e-11	3.333e-11	6.7075e-11	6.7471e-11	6.1938e-11	4.8232e-11	4.4253e-11	4.4467e-11	7.7374e-11
2024-05-29T18:01:08.607	3.43842e-09	1.10978e-09	4.85444e-10	2.75323e-10	1.47567e-10	1.928e-10	1.35244e-10	1.37179e-10	9.027e-11	9.265e-11	5.2517e-11	1.29238e-10	1.2998e-10	6.7141e-11	5.5007e-11	8.4274e-11	8.1428e-11	5.8071e-11	7.9501e-11	5.1663e-11	1.39465e-10	6.6102e-11	5.2516e-11	6.2416e-11	8.0329e-11	1.35277e-10	1.05271e-10	6.8931e-11	5.7633e-11	8.0249e-11	8.4586e-11	7.5329e-11	7.5798e-11	8.0615e-11	5.7583e-11	4.8634e-11	4.1468e-11	4.05401e-10	2.6653e-11	7.5941e-11	6.8929e-11	6.666e-11	3.8726e-11	4.7709e-11	7.062e-11	5.2097e-11	3.27594e-10	6.2886e-11	7.2032e-11
2024-05-29T18:01:12.065	4.12884e-09	1.04723e-09	3.91717e-10	2.7457e-10	1.74993e-10	1.19668e-10	9.0336e-11	1.39097e-10	1.18345e-10	9.265e-11	4.75821e-10	7.8944e-11	5.6832e-11	5.7059e-11	9.9166e-11	9.946e-11	9.3116e-11	5.3418e-11	9.18e-11	1.07132e-10	1.10256e-10	6.4002e-11	3.3214e-11	5.5326e-11	6.0392e-11	1.2426e-10	1.06647e-10	8.9543e-11	1.12616e-10	6.5523e-11	7.055e-11	5.8887e-11	7.3662e-11	1.8026e-11	8.1434e-11	6.3677e-11	3.96018e-10	2.6445e-11	6.2506e-11	2.6849e-11	7.8823e-11	2.7214e-11	5.123e-11	6.1593e-11	6.1938e-11	3.45011e-10	7.6648e-11	5.9659e-11	3.4603e-11
2024-05-29T18:01:15.525	3.70968e-09	1.25069e-09	4.83573e-10	3.05287e-10	1.46398e-10	1.48113e-10	1.3628e-10	8.7671e-11	8.5935e-11	6.3558e-11	7.0813e-11	1.43844e-10	9.7166e-11	7.9126e-11	6.5472e-11	1.15945e-10	1.04718e-10	7.7242e-11	4.5177e-10	1.05879e-10	1.19656e-10	6.6102e-11	5.5079e-11	8.3407e-11	6.4871e-11	1.42483e-10	1.0103e-10	4.10339e-10	5.4951e-11	1.1213e-10	5.2912e-11	5.6147e-11	5.0532e-11	7.2105e-11	4.4603e-11	9.7268e-11	6.1508e-11	9.161e-11	4.2141e-11	6.2967e-11	3.8235e-11	3.333e-11	6.422e-11	7.2877e-11	3.9173e-11	3.9382e-11	5.5976e-11	7.9545e-11	2.8253e-11
2024-05-29T18:01:18.983	3.83813e-09	1.10072e-09	5.91488e-10	2.54203e-10	1.64985e-10	8.3713e-11	1.10001e-10	1.0921e-10	4.89511e-10	1.05399e-10	1.28639e-10	8.0508e-11	7.8812e-11	7.4227e-11	3.8896e-11	1.30362e-10	9.5816e-11	6.0264e-11	8.2747e-11	6.9314e-11	6.5744e-11	4.3722e-11	5.5079e-11	8.5059e-11	4.4316e-11	9.1061e-11	9.0364e-11	6.4479e-11	6.0196e-11	5.5377e-11	4.3203e-11	6.1506e-11	4.7268e-11	2.5493e-11	3.9936e-10	2.5996e-11	4.5426e-11	4.5805e-11	6.2506e-11	6.2967e-11	2.7036e-11	3.333e-11	5.8089e-11	1.82713e-10	7.3286e-11	3.4105e-11	1.9791e-11	6.5955e-11	7.4751e-11
2024-05-29T18:01:22.443	4.70789e-09	1.18938e-09	4.68984e-10	3.7084e-10	1.59746e-10	1.2827e-10	1.26648e-10	1.30241e-10	1.72608e-10	1.01742e-10	1.00145e-10	6.115e-11	7.0492e-11	8.3739e-11	6.9216e-11	7.2984e-11	1.00999e-10	5.8071e-11	6.885e-11	8.798e-11	1.09024e-10	9.7766e-11	6.2137e-11	6.0146e-11	7.8563e-11	4.13508e-10	1.09348e-10	1.10343e-10	6.5019e-11	6.5523e-11	3.5275e-11	5.8887e-11	5.3597e-11	8.0615e-11	7.7255e-11	7.7988e-11	4.5426e-11	4.9475e-11	9.0383e-11	5.3698e-11	6.0454e-11	5.7729e-11	6.422e-11	1.04888e-10	3.9173e-11	5.5694e-11	7.9163e-11	6.5955e-11	9.1551e-11
2024-05-29T18:01:25.905	4.91088e-09	6.97304e-10	5.20291e-10	2.6692e-10	1.61862e-10	1.41808e-10	1.10001e-10	1.16263e-10	1.19416e-10	1.15677e-10	8.2278e-11	1.20244e-10	6.305e-11	4.187e-11	5.5007e-11	8.8674e-11	4.21904e-10	6.6407e-11	7.0736e-11	8.6449e-11	1.05242e-10	4.6741e-11	4.9821e-11	8.0001e-11	6.2672e-11	1.33141e-10	9.3536e-11	6.2133e-11	6.0196e-11	2.4765e-11	3.9439e-11	5.3266e-11	8.7524e-11	4.4155e-11	8.1434e-11	7.1193e-11	7.6464e-11	7.7101e-11	6.2506e-11	6.5767e-11	3.8235e-11	4.7136e-11	6.422e-11	3.3736e-11	7.062e-11	1.9691e-11	3.9581e-11	4.4467e-11	7.2032e-11
2024-05-29T18:01:29.358	3.42272e-09	9.2606e-10	4.5658e-10	2.72298e-10	1.4288e-10	8.5513e-11	4.9621e-10	1.15118e-10	8.1368e-11	9.5337e-11	9.0961e-11	6.3156e-11	8.9166e-11	5.7059e-11	1.04127e-10	9.946e-11	7.8233e-11	6.2378e-11	6.072e-11	5.8905e-11	1.1268e-10	5.2258e-11	6.2137e-11	6.2416e-11	1.46021e-10	1.02857e-10	5.6639e-11	7.3112e-11	5.4951e-11	5.5377e-11	6.5993e-11	5.3266e-11	8.1871e-11	3.6052e-11	1.01385e-10	9.0053e-11	6.6866e-11	3.2389e-11	5.6539e-11	1.07397e-10	8.5496e-11	4.01348e-10	0	5.8432e-11	3.3925e-11	5.5694e-11	4.4253e-11	6.8888e-11	5.9934e-11
2024-05-29T18:01:32.821	3.41089e-09	1.05991e-09	5.52399e-10	2.65364e-10	1.80732e-10	1.7629e-10	1.57363e-10	1.3226e-10	1.16173e-10	1.01742e-10	1.22651e-10	1.20244e-10	1.24108e-10	9.0909e-11	4.97088e-10	8.1209e-11	8.2979e-11	6.4424e-11	7.6116e-11	7.4867e-11	9.1512e-11	5.2258e-11	7.0457e-11	4.33074e-10	1.17248e-10	8.1096e-11	8.8736e-11	7.3112e-11	5.2131e-11	4.6332e-11	6.3593e-11	3.551e-11	6.6847e-11	5.9786e-11	8.1434e-11	4.8634e-11	8.4985e-11	4.9475e-11	5.6539e-11	7.8278e-11	7.4041e-11	2.7214e-11	6.1231e-11	0	5.1821e-11	2.7847e-11	5.5976e-11	6.2886e-11	6.9206e-11
2024-05-29T18:01:36.275	3.7332e-09	1.11578e-09	6.1992e-10	3.06641e-10	1.44064e-10	5.74437e-10	1.66909e-10	1.36209e-10	1.05851e-10	1.16763e-10	7.7572e-11	1.05915e-10	6.8707e-11	7.252e-11	8.2511e-11	1.24386e-10	3.9117e-11	7.5544e-11	6.4912e-11	6.1129e-11	8.5404e-11	6.4002e-11	4.62019e-10	6.4606e-11	1.11105e-10	1.27665e-10	8.8736e-11	8.2645e-11	7.7713e-11	7.0047e-11	7.2721e-11	3.8778e-10	5.3597e-11	5.0986e-11	6.3079e-11	3.1839e-11	3.709e-11	6.4778e-11	4.6164e-11	5.023e-11	7.8823e-11	5.7729e-11	2.7383e-11	4.3553e-11	5.5399e-11	3.4105e-11	4.4253e-11	7.9545e-11	4.4672e-11
2024-05-29T18:01:39.734	4.37584e-09	1.16257e-09	6.33896e-10	2.61432e-10	5.29497e-10	1.01781e-10	8.5536e-11	1.17398e-10	7.8176e-11	1.05399e-10	8.527e-11	6.5099e-11	4.7287e-11	9.2276e-11	7.7792e-11	1.15945e-10	1.33609e-10	5.8071e-11	5.8511e-11	8.6449e-11	7.5319e-11	2.61276e-10	4.0678e-11	1.32393e-10	7.4907e-11	1.3944e-10	9.3536e-11	5.4494e-11	9.3578e-11	9.2663e-11	4.23667e-10	6.6434e-11	1.07194e-10	5.9786e-11	4.4603e-11	9.899e-11	4.5426e-11	5.9134e-11	5.6539e-11	5.023e-11	4.6828e-11	1.9243e-11	3.8726e-11	6.4599e-11	3.9173e-11	7.3676e-11	5.9372e-11	5.9659e-11	6.3176e-11
2024-05-29T18:01:43.192	4.12721e-09	8.76407e-10	4.53259e-10	2.63798e-10	5.86742e-10	1.17094e-10	9.6365e-11	1.17398e-10	1.05851e-10	8.2564e-11	7.0813e-11	8.3547e-11	6.305e-11	6.7141e-11	5.0215e-11	1.03214e-10	1.15156e-10	3.2212e-11	4.8684e-11	1.09595e-10	9.1512e-11	2.09033e-10	6.8472e-11	8.5059e-11	8.7034e-11	1.19569e-10	8.8736e-11	5.7154e-11	5.4951e-11	5.808e-11	4.33466e-10	5.8887e-11	3.9949e-11	4.0308e-11	5.4628e-11	7.3528e-11	9.4562e-11	6.7423e-11	6.7951e-11	5.3698e-11	5.7352e-11	3.8486e-11	3.8726e-11	3.8955e-11	4.7977e-11	3.9382e-11	6.2584e-11	7.7019e-11	4.4672e-11
2024-05-29T18:01:46.651	3.82583e-09	1.30607e-09	4.48569e-10	2.75323e-10	5.52146e-10	1.27077e-10	1.06094e-10	9.9028e-11	9.837e-11	5.2699e-11	5.4852e-11	5.9077e-11	9.7166e-11	6.7141e-11	6.5472e-11	8.2756e-11	1.08309e-10	1.03129e-10	8.114e-11	6.9314e-11	7.3504e-11	4.19695e-10	5.2516e-11	1.05502e-10	9.1742e-11	1.34205e-10	1.06647e-10	5.7154e-11	6.5019e-11	7.4296e-11	4.05662e-10	6.1506e-11	7.3662e-11	7.2105e-11	6.5654e-11	5.1992e-11	2.6227e-11	5.9134e-11	3.2643e-11	3.2883e-11	7.1531e-11	4.3029e-11	4.3297e-11	4.3553e-11	5.8759e-11	6.8211e-11	4.8477e-11	4.4467e-11	8.4759e-11
2024-05-29T18:01:50.109	4.22077e-09	7.23627e-10	5.53491e-10	6.58239e-10	1.82605e-10	1.7801e-10	1.24406e-10	1.40047e-10	1.22573e-10	9.6652e-11	4.4786e-11	7.7349e-11	8.9166e-11	7.4227e-11	7.2768e-11	1.12616e-10	1.0948e-10	6.2378e-11	1.01344e-10	4.0018e-11	4.51917e-10	5.7246e-11	1.01016e-10	7.8243e-11	4.1028e-11	1.37374e-10	9.0364e-11	5.7154e-11	9.0294e-11	4.04668e-10	4.6664e-11	5.3266e-11	4.3762e-11	4.7693e-11	6.5654e-11	7.5791e-11	6.4243e-11	7.7101e-11	5.6539e-11	8.2755e-11	0	2.7214e-11	2.7383e-11	7.0226e-11	9.7932e-11	4.8232e-11	6.2584e-11	3.9773e-11	8.9344e-11
2024-05-29T18:01:53.568	4.15485e-09	9.40374e-10	6.94833e-10	2.79801e-10	2.19033e-10	1.23428e-10	1.48152e-10	1.01669e-10	9.9655e-11	1.05399e-10	1.01389e-10	7.8944e-11	8.4883e-11	1.00087e-10	6.737e-11	9.4221e-11	1.11785e-10	7.3808e-11	4.2935e-11	3.60165e-10	4.9308e-11	8.7445e-11	5.2516e-11	8.1722e-11	8.2057e-11	1.59525e-10	1.17076e-10	5.9696e-11	4.01557e-10	4.9531e-11	8.2727e-11	7.5329e-11	8.9329e-11	4.4155e-11	4.0717e-11	4.8634e-11	8.2937e-11	5.9134e-11	9.6097e-11	4.2452e-11	5.058e-11	6.666e-11	4.3297e-11	6.4599e-11	6.7849e-11	7.0996e-11	3.9581e-11	6.2886e-11	5.2857e-11
2024-05-29T18:01:57.028	3.86261e-09	9.53774e-10	6.11579e-10	2.09542e-10	1.79788e-10	1.58065e-10	1.48152e-10	1.51851e-10	5.7536e-11	5.2699e-11	7.427e-11	8.7909e-11	1.19004e-10	1.02559e-10	3.1759e-11	9.4221e-11	1.02254e-10	6.8332e-11	4.68932e-10	7.3063e-11	1.27312e-10	7.9253e-11	5.9877e-11	4.7182e-11	7.1063e-11	1.44476e-10	1.13278e-10	4.27008e-10	4.915e-11	8.7559e-11	6.5993e-11	8.6983e-11	6.6847e-11	4.7693e-11	5.7583e-11	5.1992e-11	3.709e-11	5.6099e-11	5.9597e-11	2.6849e-11	6.0454e-11	6.0852e-11	5.123e-11	1.18476e-10	9.5954e-11	2.7847e-11	5.2361e-11	6.8888e-11	8.4759e-11
2024-05-29T18:02:00.491	4.19998e-09	9.39664e-10	6.92219e-10	2.57441e-10	1.48716e-10	1.42878e-10	1.13773e-10	1.06756e-10	1.27661e-10	9.5337e-11	8.6728e-11	1.18153e-10	1.30932e-10	8.5221e-11	7.1014e-11	8.1209e-11	8.8913e-11	5.3418e-11	9.18e-11	7.8351e-11	1.1622e-10	1.6525e-11	4.0678e-11	9.4364e-11	7.3011e-11	1.40462e-10	1.35535e-10	3.20546e-10	6.5019e-11	1.0211e-10	3.9439e-11	9.2259e-11	5.6496e-11	4.4155e-11	5.1504e-11	4.5026e-11	3.85009e-10	6.202e-11	7.0516e-11	3.2883e-11	0	4.7136e-11	6.9814e-11	6.7471e-11	5.8759e-11	3.35322e-10	3.9581e-11	9.5371e-11	6.9206e-11
2024-05-29T18:02:03.943	4.32321e-09	1.10435e-09	5.68038e-10	2.86385e-10	1.16662e-10	1.23428e-10	1.1253e-10	1.52721e-10	1.26649e-10	9.4003e-11	1.43386e-10	9.8602e-11	1.33749e-10	6.129e-11	7.448e-11	8.7232e-11	1.05928e-10	5.3418e-11	5.6216e-11	8.1687e-11	9.0024e-11	8.5869e-11	7.7893e-11	6.8779e-11	1.11105e-10	1.38411e-10	4.07713e-10	9.2801e-11	9.6752e-11	4.9531e-11	5.5775e-11	4.3491e-11	8.9329e-11	5.0986e-11	7.9372e-11	6.0966e-11	6.939e-11	8.771e-11	3.2643e-11	5.6956e-11	7.647e-11	4.3029e-11	4.7429e-11	9.5419e-11	3.37547e-10	5.9072e-11	7.6648e-11	6.5955e-11	4.4672e-11
2024-05-29T18:02:07.405	4.75909e-09	1.3394e-09	6.07116e-10	2.15391e-10	1.9781e-10	1.04732e-10	8.5536e-11	1.57842e-10	1.32554e-10	6.1539e-11	8.6728e-11	9.604e-11	8.6334e-11	8.223e-11	6.3517e-11	5.7423e-11	7.3181e-11	5.5793e-11	1.02635e-10	8.0037e-11	9.8616e-11	7.9253e-11	7.2388e-11	8.0001e-11	1.01885e-10	1.20759e-10	1.31172e-10	6.4479e-11	1.04263e-10	4.9531e-11	2.4943e-11	5.6147e-11	3.9949e-11	5.9786e-11	3.79347e-10	4.1103e-11	5.8645e-11	6.4778e-11	7.0516e-11	4.2452e-11	6.8929e-11	2.7214e-11	6.1231e-11	3.87104e-10	0	4.403e-11	4.8477e-11	1.05228e-10	1.9978e-11
2024-05-29T18:02:10.862	4.57148e-09	1.05042e-09	4.72833e-10	2.59843e-10	1.96083e-10	1.34076e-10	1.1622e-10	1.00357e-10	6.5795e-11	8.4079e-11	7.0813e-11	6.8822e-11	1.02152e-10	8.0693e-11	8.0969e-11	8.4274e-11	4.6311e-10	8.2125e-11	8.8885e-11	5.4185e-11	1.1622e-10	3.6952e-11	7.7893e-11	8.827e-11	7.3011e-11	1.23104e-10	1.05271e-10	5.9696e-11	6.9508e-11	7.6332e-11	4.3203e-11	7.5329e-11	7.1463e-11	3.6052e-11	6.8133e-11	6.0966e-11	7.4181e-11	5.6099e-11	4.2141e-11	5.023e-11	6.6225e-11	4.3029e-11	4.7429e-11	5.509e-11	3.9173e-11	2.7847e-11	5.5976e-11	6.5955e-11	7.9912e-11
2024-05-29T18:02:14.325	3.85214e-09	7.57008e-10	4.73472e-10	2.75323e-10	1.22356e-10	1.01781e-10	1.50975e-10	4.8459e-10	8.1368e-11	1.12355e-10	7.2562e-11	1.16024e-10	9.191e-11	6.3301e-11	5.0215e-11	1.17034e-10	9.1737e-11	9.5285e-11	7.2574e-11	4.0018e-11	1.01319e-10	7.3904e-11	5.2516e-11	7.6444e-11	7.6757e-11	1.2878e-10	1.13278e-10	5.1698e-11	6.0196e-11	5.808e-11	4.3203e-11	9.2259e-11	3.9949e-11	2.5493e-11	3.1539e-11	8.8157e-11	2.6227e-11	4.9475e-11	7.7705e-11	6.0037e-11	6.8929e-11	3.8486e-11	3.68406e-10	3.8955e-11	9.1869e-11	4.8232e-11	4.8477e-11	3.9773e-11	9.7872e-11
2024-05-29T18:02:17.777	4.28252e-09	1.1961e-09	4.86066e-10	2.59843e-10	1.16662e-10	1.54161e-10	1.06094e-10	8.3013e-11	1.02179e-10	8.2564e-11	1.0622e-10	9.9858e-11	1.06906e-10	4.187e-11	3.48259e-10	8.2756e-11	8.7468e-11	5.5793e-11	8.7391e-11	6.7361e-11	1.22996e-10	7.2033e-11	5.2516e-11	4.29202e-10	6.0392e-11	1.32066e-10	1.34461e-10	7.1052e-11	8.1506e-11	2.4765e-11	6.8309e-11	5.8887e-11	4.10523e-10	5.4078e-11	4.0717e-11	5.1992e-11	6.939e-11	5.2891e-11	4.2141e-11	7.5941e-11	5.058e-11	2.7214e-11	9.082e-11	4.7709e-11	5.8759e-11	4.8232e-11	3.4278e-11	6.2886e-11	4.4672e-11
2024-05-29T18:02:21.236	3.84514e-09	9.39664e-10	4.27886e-10	3.00501e-10	1.10675e-10	1.34076e-10	9.7814e-11	1.13961e-10	1.47122e-10	1.00494e-10	6.5287e-11	9.8602e-11	8.4883e-11	4.67848e-10	8.2511e-11	9.5558e-11	6.7752e-11	8.5226e-11	3.6287e-11	8.3305e-11	7.1643e-11	7.3904e-11	4.40631e-10	8.1722e-11	1.35041e-10	9.1061e-11	9.3536e-11	4.2211e-11	5.2131e-11	3.9157e-11	6.1098e-11	9.3952e-11	5.6496e-11	6.7448e-11	4.4603e-11	6.8779e-11	6.1508e-11	2.6445e-11	7.5385e-11	3.2883e-11	5.058e-11	4.3029e-11	4.3297e-11	6.7471e-11	5.5399e-11	3.4105e-11	5.2361e-11	7.1701e-11	7.7374e-11
2024-05-29T18:02:24.704	3.63442e-09	8.13157e-10	6.32942e-10	2.73815e-10	5.15496e-10	1.40729e-10	1.1253e-10	1.06756e-10	1.2153e-10	1.02975e-10	7.5939e-11	1.421e-10	5.8978e-11	8.9521e-11	7.1014e-11	9.4221e-11	1.50654e-10	7.2029e-11	7.2574e-11	9.9377e-11	9.1512e-11	7.7511e-11	7.6102e-11	8.3407e-11	7.4907e-11	9.2618e-11	1.08006e-10	1.04822e-10	6.5019e-11	4.9531e-11	4.39878e-10	5.6147e-11	6.9193e-11	5.0986e-11	2.5752e-11	3.1839e-11	5.5636e-11	5.9134e-11	7.5385e-11	5.6956e-11	5.058e-11	3.8486e-11	3.3538e-11	6.1593e-11	6.7849e-11	4.403e-11	3.4278e-11	5.2614e-11	5.2857e-11
2024-05-29T18:02:28.152	3.81526e-09	1.1534e-09	4.46544e-10	5.98239e-10	1.90806e-10	1.01781e-10	1.4234e-10	1.19634e-10	1.16173e-10	8.102e-11	6.3337e-11	7.4056e-11	8.0373e-11	9.3623e-11	5.7254e-11	6.1682e-11	7.4903e-11	4.8318e-11	8.2747e-11	1.03327e-10	4.5874e-10	5.2258e-11	4.3938e-11	1.09387e-10	9.1742e-11	1.40462e-10	7.6372e-11	5.4494e-11	6.5019e-11	4.31087e-10	3.9439e-11	9.2259e-11	3.9949e-11	4.0308e-11	8.5409e-11	6.8779e-11	6.1508e-11	6.4778e-11	7.7705e-11	7.5941e-11	4.2748e-11	3.8486e-11	1.9363e-11	9.9315e-11	5.5399e-11	6.2268e-11	4.4253e-11	3.9773e-11	4.8936e-11
2024-05-29T18:02:31.612	3.80643e-09	1.37192e-09	4.4722e-10	3.09999e-10	1.46398e-10	1.82239e-10	1.50975e-10	1.39097e-10	1.35405e-10	8.9884e-11	8.074e-11	1.08243e-10	1.05738e-10	1.01331e-10	9.1219e-11	7.638e-11	8.8913e-11	6.2378e-11	6.4912e-11	5.4185e-11	8.6971e-11	9.201e-11	6.6428e-11	6.4606e-11	7.8563e-11	1.43483e-10	1.13278e-10	5.9696e-11	4.21014e-10	5.5377e-11	7.2721e-11	6.6434e-11	6.9193e-11	8.0615e-11	5.1504e-11	4.1103e-11	5.2454e-11	4.31717e-10	4.2141e-11	7.1036e-11	3.3112e-11	5.4428e-11	5.8089e-11	6.7471e-11	5.5399e-11	1.9691e-11	3.43925e-10	4.4467e-11	6.3176e-11
2024-05-29T18:02:35.069	3.84689e-09	7.74453e-10	4.52592e-10	2.22019e-10	1.7884e-10	1.82239e-10	7.8682e-11	1.26104e-10	1.05851e-10	9.4003e-11	4.89582e-10	1.05915e-10	1.04556e-10	8.3739e-11	7.2768e-11	7.1225e-11	8.5997e-11	1.05615e-10	5.1318e-11	1.07132e-10	6.3656e-11	7.0112e-11	1.6607e-11	1.04175e-10	1.19617e-10	1.50296e-10	1.05271e-10	4.5593e-11	6.9508e-11	5.2535e-11	7.688e-11	7.7393e-11	5.3597e-11	5.9786e-11	4.4603e-11	1.8382e-11	2.41088e-10	4.9475e-11	4.6164e-11	9.3008e-11	5.7352e-11	2.7214e-11	7.245e-11	5.1532e-11	5.8759e-11	3.9382e-11	3.4278e-11	5.6247e-11	3.9956e-11
2024-05-29T18:02:38.529	3.57284e-09	1.03375e-09	5.23186e-10	2.63798e-10	1.34288e-10	1.5317e-10	1.29937e-10	1.54447e-10	7.8176e-11	5.01438e-10	5.9247e-11	1.29238e-10	7.3932e-11	9.4951e-11	5.7254e-11	7.8023e-11	1.07125e-10	8.0531e-11	2.295e-11	1.4336e-10	7.3504e-11	7.2033e-11	7.7893e-11	5.7786e-11	7.8563e-11	1.6654e-10	1.37681e-10	5.4494e-11	6.9508e-11	5.5377e-11	8.2727e-11	5.6147e-11	6.1889e-11	7.2105e-11	5.4628e-11	3.98512e-10	4.1468e-11	4.5805e-11	5.6539e-11	6.8452e-11	7.8823e-11	7.6973e-11	6.7075e-11	5.8432e-11	3.89766e-10	0	6.2584e-11	4.8711e-11	5.9934e-11
2024-05-29T18:02:41.988	3.1245e-09	7.86434e-10	4.45188e-10	2.93528e-10	2.50891e-10	1.4394e-10	9.7814e-11	1.13961e-10	4.62772e-10	1.07767e-10	1.1308e-10	9.07e-11	9.969e-11	7.4227e-11	1.05331e-10	6.9421e-11	1.03493e-10	2.7897e-11	7.4366e-11	6.7361e-11	9.1512e-11	4.6741e-11	7.0457e-11	9.5827e-11	1.13602e-10	1.37374e-10	1.30056e-10	9.1187e-11	7.3725e-11	5.5377e-11	3.9439e-11	6.8765e-11	4.7268e-11	4.0308e-11	3.77156e-10	6.3677e-11	5.2454e-11	6.7423e-11	5.3305e-11	6.5767e-11	5.4072e-11	6.3822e-11	6.9814e-11	6.1593e-11	5.5399e-11	4.403e-11	2.7988e-11	7.4408e-11	5.2857e-11
2024-05-29T18:02:45.445	3.55963e-09	9.4745e-10	4.64452e-10	2.28456e-10	1.33015e-10	1.41808e-10	7.117e-11	4.38658e-10	1.12838e-10	1.04194e-10	5.0073e-11	1.24317e-10	9.191e-11	4.476e-11	6.9216e-11	8.2756e-11	7.9847e-11	5.8071e-11	6.072e-11	9.6653e-11	9.5838e-11	5.7246e-11	4.0678e-11	8.827e-11	8.0329e-11	1.10884e-10	1.10673e-10	4.2211e-11	5.7633e-11	6.3139e-11	6.5993e-11	3.551e-11	6.6847e-11	4.0308e-11	4.0717e-11	7.1193e-11	7.6464e-11	6.202e-11	5.9597e-11	2.6849e-11	6.3405e-11	6.9382e-11	3.76459e-10	6.7471e-11	4.7977e-11	6.5307e-11	4.4253e-11	4.8711e-11	4.8936e-11
2024-05-29T18:02:48.904	4.47473e-09	8.33438e-10	5.08544e-10	2.33832e-10	9.2229e-11	1.19668e-10	9.4893e-11	1.61165e-10	1.38197e-10	6.5514e-11	7.2562e-11	1.03535e-10	7.2232e-11	7.4227e-11	4.52768e-10	7.4701e-11	1.04718e-10	6.4424e-11	5.3822e-11	9.2418e-11	6.9732e-11	6.8136e-11	5.5079e-11	4.33716e-10	8.5407e-11	1.37374e-10	1.11983e-10	9.2801e-11	6.2654e-11	7.6332e-11	5.5775e-11	6.1506e-11	4.15546e-10	4.7693e-11	5.4628e-11	7.1193e-11	4.1468e-11	5.9134e-11	8.4283e-11	8.7001e-11	7.4041e-11	3.333e-11	8.6594e-11	3.3736e-11	7.3286e-11	4.403e-11	4.4253e-11	2.8123e-11	4.8936e-11
2024-05-29T18:02:52.362	4.01643e-09	8.67213e-10	6.84318e-10	3.4117e-10	1.74993e-10	1.2827e-10	1.19797e-10	9.6314e-11	9.3048e-11	1.12355e-10	8.9572e-11	1.02324e-10	8.6334e-11	9.8828e-11	4.65942e-10	9.6876e-11	7.4903e-11	3.6014e-11	7.2574e-11	1.02027e-10	1.1622e-10	8.4264e-11	7.7893e-11	4.66483e-10	6.0392e-11	1.00039e-10	8.7077e-11	6.4479e-11	6.2654e-11	8.0249e-11	7.483e-11	6.6434e-11	8.1871e-11	6.4994e-11	4.8177e-11	6.8779e-11	4.9066e-11	4.5805e-11	5.9597e-11	9.3008e-11	8.3331e-11	2.7214e-11	2.7383e-11	5.1532e-11	6.1938e-11	5.2097e-11	3.9581e-11	4.4467e-11	6.3176e-11
2024-05-29T18:02:55.821	4.34805e-09	1.04404e-09	4.4722e-10	2.45076e-10	1.73038e-10	5.29446e-10	1.19797e-10	1.19634e-10	1.39115e-10	7.7842e-11	1.1308e-10	1.01098e-10	5.6832e-11	6.7141e-11	6.3517e-11	7.1225e-11	1.03493e-10	7.3808e-11	3.6287e-11	9.0963e-11	7.1643e-11	8.4264e-11	4.33055e-10	5.7786e-11	1.31883e-10	1.15926e-10	1.09348e-10	5.9696e-11	1.15267e-10	7.6332e-11	4.3203e-11	3.83283e-10	9.2833e-11	8.645e-11	5.4628e-11	5.5146e-11	8.2937e-11	5.6099e-11	7.5385e-11	5.023e-11	5.058e-11	1.9243e-11	4.3297e-11	4.7709e-11	7.5857e-11	1.9691e-11	5.9372e-11	5.6247e-11	2.8253e-11
2024-05-29T18:02:59.279	4.55969e-09	1.01682e-09	5.6162e-10	2.77571e-10	5.10522e-10	1.39643e-10	8.218e-11	1.40047e-10	1.02179e-10	7.6203e-11	8.527e-11	1.02324e-10	1.17955e-10	6.129e-11	7.6154e-11	9.0093e-11	7.8233e-11	8.8217e-11	8.7391e-11	8.3305e-11	8.052e-11	1.53251e-10	5.5079e-11	1.15572e-10	7.6757e-11	1.21937e-10	1.03877e-10	5.7154e-11	6.2654e-11	5.2535e-11	4.12129e-10	5.6147e-11	1.21171e-10	7.6479e-11	3.1539e-11	5.1992e-11	6.1508e-11	4.5805e-11	4.2141e-11	3.797e-11	9.9337e-11	7.4528e-11	2.7383e-11	6.7471e-11	3.3925e-11	8.806e-11	5.9372e-11	5.9659e-11	5.9934e-11
2024-05-29T18:03:02.738	3.42861e-09	9.77976e-10	5.17379e-10	2.58244e-10	1.46398e-10	1.55146e-10	9.6365e-11	1.30241e-10	7.9788e-11	1.15677e-10	9.2329e-11	8.5026e-11	4.73397e-10	9.4951e-11	1.02909e-10	1.00727e-10	8.7468e-11	5.8071e-11	7.4366e-11	8.4892e-11	5.9261e-11	4.49238e-10	6.6428e-11	1.14362e-10	7.3011e-11	1.46441e-10	9.0364e-11	5.4494e-11	4.2565e-11	5.808e-11	7.483e-11	9.7249e-11	5.3597e-11	6.2444e-11	4.0717e-11	5.1992e-11	9.9869e-11	4.1814e-11	7.0516e-11	6.5767e-11	7.1531e-11	2.7214e-11	4.3297e-11	6.1593e-11	0	2.7847e-11	4.4253e-11	5.9659e-11	7.7374e-11
2024-05-29T18:03:06.196	3.50051e-09	6.62933e-10	4.74109e-10	5.39629e-10	1.44064e-10	1.47081e-10	1.24406e-10	1.0921e-10	9.9655e-11	7.6203e-11	8.9572e-11	8.6479e-11	6.8707e-11	8.0693e-11	9.5276e-11	7.9632e-11	1.03493e-10	4.2613e-11	7.0736e-11	9.0963e-11	4.31427e-10	5.9583e-11	8.1357e-11	8.3407e-11	6.0392e-11	1.37374e-10	8.0099e-11	9.1187e-11	6.7301e-11	4.18819e-10	8.0825e-11	6.8765e-11	1.7866e-11	8.455e-11	4.8177e-11	7.1193e-11	4.9066e-11	1.04116e-10	5.9597e-11	6.0037e-11	2.7036e-11	4.3029e-11	5.4767e-11	5.509e-11	4.7977e-11	5.2097e-11	2.7988e-11	5.9659e-11	7.9912e-11
2024-05-29T18:03:09.654	3.39903e-09	7.83029e-10	5.87902e-10	3.1266e-10	1.57602e-10	1.59026e-10	1.20966e-10	1.0799e-10	7.8176e-11	6.5514e-11	5.9247e-11	1.75107e-10	1.03361e-10	4.476e-11	7.2768e-11	9.6876e-11	9.1737e-11	6.6407e-11	7.7827e-11	8.3305e-11	1.11475e-10	7.7511e-11	3.3214e-11	7.8243e-11	8.2057e-11	1.18367e-10	1.05271e-10	6.2133e-11	7.1648e-11	4.2895e-11	3.9439e-11	6.1506e-11	7.1463e-11	3.1222e-11	5.1504e-11	6.3677e-11	5.8645e-11	4.0237e-10	4.6164e-11	7.1036e-11	5.4072e-11	4.7136e-11	5.123e-11	5.8432e-11	5.5399e-11	5.2097e-11	3.23382e-10	3.4444e-11	7.4751e-11
2024-05-29T18:03:13.119	3.60098e-09	8.64127e-10	5.13863e-10	3.16607e-10	1.70063e-10	1.80559e-10	1.33136e-10	8.7671e-11	1.22573e-10	7.106e-11	5.12357e-10	9.3408e-11	3.861e-11	7.0772e-11	9.1219e-11	8.8674e-11	1.1292e-10	6.6407e-11	6.4912e-11	9.0963e-11	7.1643e-11	6.1833e-11	3.7134e-11	7.6444e-11	8.8631e-11	1.04238e-10	1.11983e-10	6.4479e-11	7.1648e-11	8.0249e-11	9.3329e-11	7.7393e-11	4.3762e-11	3.6052e-11	5.4628e-11	4.1103e-11	3.6056e-10	5.9134e-11	5.9597e-11	5.6956e-11	3.3112e-11	0	4.7429e-11	1.9477e-11	8.7593e-11	3.57701e-10	4.8477e-11	1.19318e-10	6.626e-11
2024-05-29T18:03:16.572	3.67661e-09	7.04925e-10	7.27959e-10	2.76824e-10	1.27797e-10	1.55146e-10	1.31014e-10	1.12792e-10	7.9788e-11	5.5043e-11	1.0622e-10	1.12755e-10	1.08062e-10	8.0693e-11	6.9216e-11	9.6876e-11	1.05928e-10	8.6734e-11	4.37255e-10	8.1687e-11	1.36528e-10	5.2258e-11	6.4318e-11	8.827e-11	5.8023e-11	1.41476e-10	8.0099e-11	3.94849e-10	6.0196e-11	7.6332e-11	7.688e-11	7.3207e-11	5.0532e-11	4.4155e-11	4.0717e-11	7.1193e-11	4.1468e-11	3.2389e-11	5.3305e-11	7.3529e-11	0	1.9243e-11	3.8726e-11	8.9256e-11	5.1821e-11	3.9382e-11	6.5638e-11	4.4467e-11	2.8253e-11
2024-05-29T18:03:20.030	4.59206e-09	9.25339e-10	6.07116e-10	3.92017e-10	1.64985e-10	1.83073e-10	9.188e-11	1.43782e-10	1.37273e-10	8.2564e-11	1.02618e-10	9.4733e-11	9.7166e-11	1.01331e-10	5.5007e-11	4.7779e-11	9.8441e-11	6.6407e-11	4.2935e-11	6.9314e-11	9.0024e-11	7.9253e-11	5.5079e-11	6.4606e-11	7.8563e-11	1.52186e-10	1.23146e-10	4.18579e-10	8.1506e-11	8.7559e-11	8.9934e-11	6.1506e-11	6.4416e-11	6.2444e-11	5.4628e-11	5.5146e-11	5.5636e-11	3.7399e-11	5.3305e-11	4.6504e-11	3.3112e-11	1.9243e-11	5.4767e-11	7.7909e-11	5.8759e-11	5.2097e-11	3.4278e-11	5.6247e-11	5.2857e-11
2024-05-29T18:03:23.487	3.76374e-09	1.12828e-09	5.3007e-10	2.29361e-10	1.82605e-10	1.29452e-10	1.19797e-10	8.1401e-11	4.85856e-10	1.07767e-10	1.01389e-10	6.8822e-11	1.00929e-10	3.5386e-11	8.4025e-11	6.757e-11	2.766e-11	4.6149e-10	4.8684e-11	8.1687e-11	3.6752e-11	7.3904e-11	5.2516e-11	8.827e-11	8.2057e-11	1.53123e-10	1.2893e-10	7.1052e-11	4.5975e-11	7.8315e-11	1.7637e-11	6.6434e-11	5.3597e-11	5.7004e-11	9.806e-11	5.5146e-11	8.894e-11	5.6099e-11	6.2506e-11	1.8985e-11	2.7036e-11	5.4428e-11	4.7429e-11	3.8955e-11	6.1938e-11	7.8763e-11	3.4278e-11	4.4467e-11	5.2857e-11
2024-05-29T18:03:26.947	4.91636e-09	8.46952e-10	4.94692e-10	2.40814e-10	1.44064e-10	1.37438e-10	1.5004e-10	1.23985e-10	7.9788e-11	9.1278e-11	6.902e-11	7.5721e-11	8.1904e-11	8.6678e-11	7.448e-11	9.0093e-11	4.99398e-10	6.8332e-11	8.8885e-11	9.3851e-11	6.9732e-11	4.0479e-11	6.8472e-11	8.5059e-11	5.8023e-11	1.51244e-10	1.32279e-10	8.9543e-11	5.7633e-11	1.00597e-10	4.6664e-11	6.1506e-11	3.9949e-11	2.5493e-11	6.8133e-11	6.0966e-11	9.2726e-11	5.9134e-11	4.2141e-11	6.8452e-11	3.3112e-11	5.0913e-11	1.9363e-11	6.7471e-11	5.5399e-11	6.5307e-11	6.8557e-11	5.6247e-11	7.9912e-11
2024-05-29T18:03:30.406	3.36719e-09	1.11937e-09	5.81183e-10	2.4592e-10	1.12202e-10	1.04732e-10	1.53745e-10	9.9028e-11	1.35405e-10	8.4079e-11	1.1084e-10	8.6479e-11	9.969e-11	1.03773e-10	7.1014e-11	4.64054e-10	8.8913e-11	9.3914e-11	4.59e-11	1.02027e-10	9.4418e-11	6.6102e-11	5.7528e-11	1.14362e-10	4.2933e-10	1.78954e-10	1.14558e-10	6.8931e-11	5.4951e-11	6.0662e-11	5.5775e-11	6.4017e-11	8.9329e-11	6.7448e-11	6.0393e-11	6.8779e-11	7.1825e-11	6.4778e-11	5.9597e-11	3.797e-11	5.4072e-11	4.7136e-11	1.9363e-11	5.509e-11	7.5857e-11	0	2.7988e-11	4.8711e-11	3.4603e-11
2024-05-29T18:03:33.872	4.60377e-09	9.83425e-10	5.16795e-10	2.32054e-10	2.58243e-10	1.10397e-10	8.5536e-11	1.27149e-10	1.3159e-10	6.5514e-11	6.902e-11	8.9315e-11	7.5594e-11	7.7527e-11	6.3517e-11	4.66236e-10	6.9609e-11	1.12743e-10	5.3822e-11	1.16672e-10	4.9308e-11	4.9576e-11	9.8248e-11	6.4606e-11	4.45682e-10	1.6568e-10	1.11983e-10	7.1052e-11	9.5178e-11	7.6332e-11	5.8497e-11	6.8765e-11	1.02631e-10	4.0308e-11	4.4603e-11	5.8129e-11	4.1468e-11	4.9475e-11	5.6539e-11	5.023e-11	5.4072e-11	3.333e-11	3.8726e-11	9.5419e-11	6.7849e-11	4.8232e-11	5.9372e-11	5.2614e-11	5.6506e-11
2024-05-29T18:03:37.323	3.31885e-09	8.06559e-10	5.18546e-10	2.70006e-10	1.41685e-10	1.27077e-10	1.41348e-10	8.7671e-11	1.23606e-10	7.7842e-11	1.1084e-10	6.115e-11	1.10337e-10	6.129e-11	4.38049e-10	9.149e-11	1.50654e-10	6.8332e-11	6.885e-11	7.1213e-11	1.10256e-10	5.7246e-11	5.7528e-11	4.50089e-10	6.2672e-11	1.43483e-10	1.14558e-10	1.03396e-10	9.3578e-11	5.2535e-11	3.9439e-11	5.3266e-11	4.43776e-10	5.7004e-11	4.0717e-11	8.8157e-11	4.1468e-11	5.9134e-11	4.9862e-11	6.2967e-11	8.5496e-11	5.7729e-11	7.7452e-11	6.7471e-11	6.1938e-11	4.403e-11	3.4278e-11	2.8123e-11	7.7374e-11
2024-05-29T18:03:40.786	4.63583e-09	1.1557e-09	6.56374e-10	3.13321e-10	1.4288e-10	4.81843e-10	1.08714e-10	1.57e-10	1.12838e-10	8.102e-11	6.5287e-11	1.09389e-10	9.5879e-11	4.187e-11	5.7254e-11	9.2866e-11	7.4903e-11	1.05615e-10	5.3822e-11	6.535e-11	5.9261e-11	5.2258e-11	4.51452e-10	6.2416e-11	1.07251e-10	8.9477e-11	1.25492e-10	5.1698e-11	1.02804e-10	5.5377e-11	4.9886e-11	3.82047e-10	3.5731e-11	3.6052e-11	4.4603e-11	3.1839e-11	7.1825e-11	6.202e-11	1.8846e-11	9.4926e-11	4.2748e-11	6.666e-11	5.123e-11	4.3553e-11	3.3925e-11	6.2268e-11	4.4253e-11	4.8711e-11	6.3176e-11
2024-05-29T18:03:44.239	3.9471e-09	1.18206e-09	5.60543e-10	3.28174e-10	1.96083e-10	1.39643e-10	7.8682e-11	1.62801e-10	1.03417e-10	8.8469e-11	5.4852e-11	1.17094e-10	4.55477e-10	6.3301e-11	1.33801e-10	9.8176e-11	6.7752e-11	6.6407e-11	6.4912e-11	8.9484e-11	7.3504e-11	4.37535e-10	3.7134e-11	1.11902e-10	8.8631e-11	1.29885e-10	8.7077e-11	2.4371e-11	6.5019e-11	4.2895e-11	3.71645e-10	6.6434e-11	7.7875e-11	3.6052e-11	5.1504e-11	3.6764e-11	4.9066e-11	3.2389e-11	7.299e-11	5.6956e-11	1.06441e-10	6.0852e-11	4.3297e-11	8.0307e-11	4.3797e-11	9.2358e-11	5.2361e-11	9.113e-11	8.9344e-11
2024-05-29T18:03:47.698	4.29978e-09	7.3371e-10	4.59876e-10	5.42691e-10	9.2229e-11	1.35207e-10	9.9242e-11	1.25049e-10	1.18345e-10	3.8921e-11	7.2562e-11	6.5099e-11	8.0373e-11	6.7141e-11	9.5276e-11	8.4274e-11	7.4903e-11	1.09237e-10	6.285e-11	6.3274e-11	3.63828e-10	8.2627e-11	7.9644e-11	1.05502e-10	8.2057e-11	9.8599e-11	9.9577e-11	4.2211e-11	7.3725e-11	4.24637e-10	5.5775e-11	6.6434e-11	8.1871e-11	4.0308e-11	6.3079e-11	6.0966e-11	8.894e-11	4.9475e-11	4.6164e-11	8.9049e-11	5.058e-11	2.7214e-11	1.9363e-11	6.4599e-11	3.9173e-11	5.2097e-11	7.9163e-11	5.2614e-11	4.8936e-11
2024-05-29T18:03:51.156	4.38352e-09	1.11218e-09	4.64452e-10	2.99119e-10	1.58678e-10	1.30624e-10	9.3399e-11	1.63613e-10	9.3048e-11	5.729e-11	9.2329e-11	1.21276e-10	1.02152e-10	5.2486e-11	1.11155e-10	6.5666e-11	9.0336e-11	6.6407e-11	5.3822e-11	5.6594e-11	1.05242e-10	5.9583e-11	8.3035e-11	6.8779e-11	9.02e-11	1.38411e-10	7.2453e-11	5.7154e-11	3.84266e-10	4.9531e-11	1.07285e-10	9.7249e-11	3.9949e-11	5.7004e-11	7.0524e-11	5.5146e-11	7.8681e-11	7.7101e-11	4.9862e-11	4.2452e-11	6.3405e-11	3.333e-11	0	9.7386e-11	1.17519e-10	3.9382e-11	3.24591e-10	4.4467e-11	6.626e-11
2024-05-29T18:03:54.615	3.94369e-09	1.2237e-09	6.12566e-10	1.6282e-10	2.77303e-10	1.51168e-10	1.08714e-10	1.05507e-10	1.40934e-10	8.2564e-11	8.2278e-11	1.39444e-10	7.722e-11	5.2486e-11	5.7254e-11	6.9421e-11	1.36442e-10	3.6014e-11	8.114e-11	5.1663e-11	5.1975e-11	5.7246e-11	7.6102e-11	3.7301e-11	5.5553e-11	1.2878e-10	7.4438e-11	4.46389e-10	6.2654e-11	7.8315e-11	6.8309e-11	7.7393e-11	5.3597e-11	1.00365e-10	8.1434e-11	4.5026e-11	6.939e-11	8.771e-11	6.2506e-11	4.6504e-11	6.0454e-11	6.666e-11	6.1231e-11	4.7709e-11	5.1821e-11	3.82326e-10	5.2361e-11	8.1993e-11	6.9206e-11
2024-05-29T18:03:58.076	4.24463e-09	1.06682e-09	5.93528e-10	2.52568e-10	1.44064e-10	1.36328e-10	1.342e-10	1.29209e-10	1.02179e-10	4.91286e-10	9.2329e-11	1.03535e-10	1.22094e-10	7.5895e-11	3.1759e-11	9.149e-11	1.14044e-10	6.0264e-11	6.691e-11	8.0037e-11	7.1643e-11	3.3051e-11	9.3943e-11	8.9832e-11	6.4871e-11	1.15926e-10	9.6603e-11	8.4422e-11	1.04263e-10	7.2203e-11	3.0549e-11	6.1506e-11	3.9949e-11	3.6052e-11	6.3079e-11	3.97238e-10	6.1508e-11	6.202e-11	5.3305e-11	8.9049e-11	2.7036e-11	4.7136e-11	7.245e-11	5.1532e-11	3.35838e-10	2.7847e-11	6.5638e-11	5.2614e-11	4.4672e-11
2024-05-29T18:04:01.532	4.17747e-09	1.24748e-09	3.90953e-10	3.04608e-10	1.23739e-10	1.01781e-10	1.79108e-10	1.31254e-10	5.06098e-10	7.2814e-11	1.22651e-10	8.3547e-11	8.7761e-11	8.223e-11	1.08863e-10	7.1225e-11	8.8913e-11	4.36057e-10	6.285e-11	7.1213e-11	7.5319e-11	8.0958e-11	5.7528e-11	2.8893e-11	6.9061e-11	1.43483e-10	9.3536e-11	1.03396e-10	6.9508e-11	5.5377e-11	5.2912e-11	9.0534e-11	6.6847e-11	4.0308e-11	2.09999e-10	4.8634e-11	6.6866e-11	3.2389e-11	4.6164e-11	8.2755e-11	6.6225e-11	5.0913e-11	3.8726e-11	7.0226e-11	5.5399e-11	5.2097e-11	3.4278e-11	0	3.4603e-11
2024-05-29T18:04:04.989	3.97599e-09	1.21548e-09	6.49898e-10	1.75079e-10	2.26667e-10	9.4e-11	1.29937e-10	6.3052e-11	1.04641e-10	9.5337e-11	8.074e-11	1.29238e-10	9.7166e-11	7.5895e-11	7.7792e-11	6.5666e-11	4.56175e-10	8.0531e-11	7.4366e-11	3.6532e-11	5.9261e-11	4.9576e-11	6.6428e-11	8.0001e-11	8.7034e-11	1.54054e-10	1.2893e-10	5.4494e-11	7.3725e-11	4.9531e-11	6.1098e-11	5.0219e-11	6.6847e-11	5.0986e-11	5.7583e-11	5.5146e-11	5.5636e-11	4.5805e-11	5.9597e-11	3.797e-11	3.3112e-11	7.6973e-11	5.8089e-11	6.1593e-11	6.1938e-11	2.7847e-11	5.2361e-11	3.4444e-11	6.9206e-11
2024-05-29T18:04:08.457	4.62129e-09	9.83425e-10	5.45796e-10	2.98426e-10	1.99523e-10	1.58065e-10	1.06094e-10	1.27149e-10	6.3831e-11	1.08932e-10	8.6728e-11	7.4056e-11	1.06906e-10	6.5249e-11	5.9415e-11	7.8023e-11	7.9847e-11	6.2378e-11	7.0736e-11	1.03327e-10	1.01319e-10	4.0479e-11	9.096e-11	1.09387e-10	9.622e-11	1.3098e-10	1.34461e-10	8.4422e-11	6.5019e-11	6.0662e-11	4.6664e-11	7.3207e-11	3.97889e-10	5.0986e-11	3.1539e-11	5.1992e-11	7.1825e-11	7.7101e-11	4.6164e-11	5.023e-11	6.0454e-11	7.6973e-11	6.422e-11	4.3553e-11	3.9173e-11	4.403e-11	5.2361e-11	6.8888e-11	5.2857e-11
2024-05-29T18:04:11.911	3.84339e-09	8.83995e-10	4.90398e-10	2.32945e-10	1.87205e-10	1.2827e-10	1.1253e-10	1.57e-10	1.02179e-10	7.2814e-11	9.3677e-11	8.2042e-11	1.31878e-10	4.86993e-10	9.1219e-11	1.23364e-10	9.8441e-11	8.8217e-11	7.0736e-11	9.8024e-11	6.1498e-11	6.8136e-11	4.52976e-10	8.3407e-11	1.07251e-10	1.29885e-10	1.10673e-10	8.2645e-11	9.5178e-11	7.2203e-11	7.688e-11	5.0219e-11	7.5798e-11	4.7693e-11	6.3079e-11	8.2207e-11	7.8681e-11	8.5693e-11	4.2141e-11	9.105e-11	5.7352e-11	6.666e-11	5.123e-11	4.3553e-11	2.7699e-11	5.2097e-11	3.9581e-11	7.7019e-11	5.6506e-11
2024-05-29T18:04:15.365	3.60471e-09	1.3344e-09	5.13275e-10	5.16488e-10	1.74993e-10	9.0701e-11	1.10001e-10	1.11611e-10	1.36342e-10	1.10085e-10	8.9572e-11	7.4056e-11	1.16897e-10	1.15209e-10	6.15e-11	1.00727e-10	9.4476e-11	3.6014e-11	8.4323e-11	8.6449e-11	1.4234e-10	5.2258e-11	1.0371e-10	5.5326e-11	5.0249e-11	1.49342e-10	1.14558e-10	1.21853e-10	7.5745e-11	4.00479e-10	9.3329e-11	8.8776e-11	5.9254e-11	6.9814e-11	7.0524e-11	6.8779e-11	7.6464e-11	4.9475e-11	5.3305e-11	5.023e-11	3.8235e-11	2.7214e-11	3.8726e-11	6.1593e-11	5.5399e-11	4.403e-11	7.1356e-11	3.50699e-10	3.4603e-11
2024-05-29T18:04:18.824	3.43842e-09	7.80466e-10	5.61081e-10	5.91624e-10	1.27797e-10	2.10914e-10	1.19797e-10	9.0644e-11	8.7404e-11	8.4079e-11	1.11966e-10	9.7329e-11	8.4883e-11	7.0772e-11	1.15603e-10	5.7423e-11	9.7138e-11	8.0531e-11	8.8885e-11	6.535e-11	9.8616e-11	4.3722e-11	7.2388e-11	7.2713e-11	7.4907e-11	9.4149e-11	7.4438e-11	7.897e-11	3.8856e-11	4.02007e-10	8.0825e-11	1.16429e-10	6.6847e-11	5.0986e-11	6.5654e-11	4.1103e-11	3.709e-11	4.9475e-11	7.0516e-11	7.3529e-11	6.3405e-11	9.2287e-11	0	6.7471e-11	4.7977e-11	3.9382e-11	3.4278e-11	7.9545e-11	4.8936e-11
2024-05-29T18:04:22.284	4.52857e-09	1.00559e-09	4.09116e-10	3.26275e-10	1.82605e-10	1.90415e-10	1.41348e-10	6.7125e-11	7.653e-11	9.5337e-11	4.51764e-10	9.9858e-11	9.0548e-11	6.5249e-11	3.8896e-11	4.5046e-11	6.5843e-11	4.8318e-11	5.8511e-11	3.98177e-10	1.15052e-10	7.2033e-11	6.2137e-11	7.2713e-11	7.3011e-11	1.04238e-10	1.37681e-10	6.4479e-11	1.16569e-10	4.9531e-11	6.5993e-11	3.9702e-11	5.3597e-11	7.2105e-11	3.6418e-11	4.8634e-11	1.04908e-10	3.2389e-11	5.9597e-11	5.3698e-11	4.6828e-11	4.7136e-11	9.2862e-11	5.509e-11	4.3797e-11	3.4105e-11	3.4278e-11	2.8123e-11	3.4603e-11
2024-05-29T18:04:25.741	3.63257e-09	1.11098e-09	4.39726e-10	2.76075e-10	2.19033e-10	1.18388e-10	1.20966e-10	1.00357e-10	1.1396e-10	9.7949e-11	9.2329e-11	1.03535e-10	8.6334e-11	6.3301e-11	5.9415e-11	9.0093e-11	5.9752e-11	2.05629e-10	7.6116e-11	1.03327e-10	1.13872e-10	4.3722e-11	8.1357e-11	5.5326e-11	9.4751e-11	1.2878e-10	4.21777e-10	5.9696e-11	5.4951e-11	6.0662e-11	5.2912e-11	5.8887e-11	9.9472e-11	7.6479e-11	7.5079e-11	7.5791e-11	4.9066e-11	6.9968e-11	7.0516e-11	4.2452e-11	1.9117e-11	8.1642e-11	2.7383e-11	6.7471e-11	3.9173e-11	4.403e-11	5.9372e-11	5.2614e-11	8.4759e-11
2024-05-29T18:04:29.204	4.35115e-09	8.44583e-10	4.3766e-10	2.27548e-10	1.74993e-10	8.5513e-11	1.1622e-10	1.69188e-10	5.00812e-10	8.703e-11	1.01389e-10	6.115e-11	1.05738e-10	4.187e-11	7.2768e-11	8.4274e-11	1.15156e-10	5.5793e-11	7.6116e-11	9.0963e-11	6.9732e-11	3.3051e-11	5.2516e-11	7.8243e-11	4.4316e-11	9.2618e-11	9.3536e-11	7.5115e-11	6.9508e-11	7.6332e-11	5.5775e-11	5.0219e-11	6.9193e-11	8.455e-11	4.04721e-10	5.1992e-11	7.6464e-11	4.1814e-11	8.4283e-11	6.0037e-11	5.058e-11	6.3822e-11	5.8089e-11	3.6125e-10	4.7977e-11	4.403e-11	4.4253e-11	7.1701e-11	8.2371e-11
2024-05-29T18:04:32.664	4.44302e-09	8.90769e-10	4.62497e-10	1.82038e-10	1.79788e-10	1.5317e-10	1.25532e-10	5.52565e-10	6.9558e-11	1.27115e-10	1.07394e-10	8.5026e-11	8.4883e-11	4.7476e-11	6.15e-11	7.1225e-11	1.0948e-10	3.9452e-11	4.8684e-11	3.6532e-11	8.5404e-11	3.6952e-11	7.4268e-11	4.4135e-11	1.01885e-10	1.15926e-10	1.14558e-10	9.5947e-11	5.4951e-11	4.6332e-11	3.9439e-11	4.3491e-11	8.9329e-11	4.0308e-11	6.5654e-11	9.373e-11	7.6464e-11	3.2389e-11	5.9597e-11	6.2967e-11	8.1108e-11	6.0852e-11	3.78941e-10	5.1532e-11	4.7977e-11	6.2268e-11	6.8557e-11	3.4444e-11	6.3176e-11
2024-05-29T18:04:36.122	4.52411e-09	1.05105e-09	5.74385e-10	2.20146e-10	1.7884e-10	1.31785e-10	1.29937e-10	8.6146e-11	1.22573e-10	9.7949e-11	1.19546e-10	1.11644e-10	9.4574e-11	7.252e-11	6.5472e-11	4.8829e-10	7.9847e-11	7.2029e-11	7.2574e-11	1.10806e-10	4.9308e-11	5.2258e-11	6.2137e-11	8.6679e-11	4.20082e-10	9.8599e-11	9.0364e-11	8.787e-11	9.3578e-11	3.0331e-11	7.483e-11	6.1506e-11	1.19847e-10	9.0131e-11	4.0717e-11	6.6277e-11	6.1508e-11	8.5693e-11	5.9597e-11	5.3698e-11	1.9117e-11	8.1642e-11	3.8726e-11	4.7709e-11	4.3797e-11	4.8232e-11	3.9581e-11	3.9773e-11	6.626e-11
2024-05-29T18:04:39.575	3.93172e-09	9.90193e-10	6.76771e-10	2.39952e-10	1.54329e-10	1.38536e-10	1.40349e-10	1.79081e-10	1.40028e-10	7.9447e-11	8.074e-11	1.04732e-10	1.46175e-10	8.9521e-11	7.448e-11	1.01978e-10	1.10639e-10	8.0531e-11	5.8511e-11	1.15523e-10	7.5319e-11	7.7511e-11	7.9644e-11	3.23894e-10	8.8631e-11	1.50296e-10	1.13278e-10	5.9696e-11	5.4951e-11	7.6332e-11	7.2721e-11	6.8765e-11	4.14393e-10	5.0986e-11	3.6418e-11	3.1839e-11	3.2121e-11	3.7399e-11	7.9958e-11	7.8278e-11	7.647e-11	9.2287e-11	6.9814e-11	3.8955e-11	5.5399e-11	5.5694e-11	8.1599e-11	6.2886e-11	6.626e-11
2024-05-29T18:04:43.034	4.3527e-09	7.16205e-10	4.43148e-10	2.71536e-10	1.64985e-10	1.18388e-10	1.2327e-10	1.18521e-10	1.0823e-10	7.106e-11	7.7572e-11	9.4733e-11	9.969e-11	4.59749e-10	5.5007e-11	5.2822e-11	5.7578e-11	6.2378e-11	5.1318e-11	9.0963e-11	1.01319e-10	8.8992e-11	4.41257e-10	4.7182e-11	1.14831e-10	7.9313e-11	1.19541e-10	1.0195e-10	9.1951e-11	4.9531e-11	3.5275e-11	8.8776e-11	6.1889e-11	3.6052e-11	3.6418e-11	4.1103e-11	4.5426e-11	6.7423e-11	5.9597e-11	4.6504e-11	6.3405e-11	7.9342e-11	5.123e-11	4.3553e-11	3.9173e-11	1.9691e-11	3.4278e-11	6.2886e-11	0
2024-05-29T18:04:46.492	3.92315e-09	1.44032e-09	5.50207e-10	2.75323e-10	1.3173e-10	1.30624e-10	1.35244e-10	1.63613e-10	1.11703e-10	9.1278e-11	6.1326e-11	8.7909e-11	3.57359e-10	6.898e-11	1.32855e-10	1.19182e-10	1.0948e-10	7.3808e-11	8.2747e-11	1.16672e-10	6.9732e-11	4.46188e-10	7.4268e-11	7.4601e-11	1.20784e-10	1.17153e-10	1.23146e-10	5.4494e-11	7.5745e-11	6.0662e-11	3.89625e-10	6.4017e-11	1.05695e-10	3.6052e-11	4.0717e-11	4.8634e-11	7.1825e-11	6.7423e-11	1.8846e-11	7.1036e-11	4.2748e-11	5.0913e-11	8.4401e-11	4.3553e-11	5.8759e-11	4.403e-11	4.8477e-11	3.9773e-11	7.9912e-11
2024-05-29T18:04:49.956	4.34496e-09	1.00359e-09	4.20047e-10	6.20666e-10	1.3173e-10	1.04732e-10	1.20966e-10	1.16263e-10	1.1396e-10	1.00494e-10	8.8162e-11	6.8822e-11	1.04556e-10	7.5895e-11	8.4025e-11	1.26401e-10	6.1848e-11	7.7242e-11	9.7368e-11	7.1213e-11	4.63718e-10	5.4809e-11	4.9821e-11	5.5326e-11	7.6757e-11	1.08274e-10	1.14558e-10	6.2133e-11	8.3338e-11	4.30731e-10	3.0549e-11	8.5151e-11	1.04174e-10	2.5493e-11	6.0393e-11	7.1193e-11	3.2121e-11	1.87e-11	5.9597e-11	6.5767e-11	4.6828e-11	4.3029e-11	4.3297e-11	8.49e-11	4.7977e-11	5.9072e-11	5.5976e-11	3.4444e-11	3.9956e-11
2024-05-29T18:04:53.409	3.69654e-09	8.98979e-10	4.63801e-10	3.03927e-10	1.63951e-10	7.999e-11	1.472e-10	1.02964e-10	1.22573e-10	1.22049e-10	9.2329e-11	8.3547e-11	1.05738e-10	7.7527e-11	8.0969e-11	1.19182e-10	9.0336e-11	5.8071e-11	5.3822e-11	7.8351e-11	8.218e-11	1.04516e-10	5.2516e-11	1.13139e-10	6.9061e-11	1.45462e-10	1.06647e-10	5.7154e-11	7.1648e-11	5.808e-11	6.3593e-11	7.1021e-11	3.9949e-11	3.1222e-11	5.1504e-11	7.5791e-11	8.0837e-11	3.95799e-10	5.6539e-11	8.2755e-11	3.8235e-11	5.4428e-11	2.7383e-11	8.0307e-11	4.7977e-11	3.4105e-11	3.75501e-10	8.8934e-11	8.4759e-11
2024-05-29T18:04:56.867	4.35579e-09	7.3371e-10	5.34045e-10	2.3116e-10	2.03742e-10	1.928e-10	1.15003e-10	8.1401e-11	9.027e-11	7.9447e-11	1.35289e-10	9.604e-11	7.5594e-11	8.223e-11	9.3943e-11	1.28402e-10	9.5816e-11	4.5555e-11	7.6116e-11	1.03327e-10	9.2976e-11	6.8136e-11	5.9877e-11	7.6444e-11	6.9061e-11	1.33141e-10	1.05271e-10	6.2133e-11	9.5178e-11	6.7822e-11	7.8877e-11	5.8887e-11	4.3762e-11	3.1222e-11	4.0717e-11	4.8634e-11	3.96885e-10	3.2389e-11	4.2141e-11	3.797e-11	5.4072e-11	5.7729e-11	6.7075e-11	5.509e-11	6.4961e-11	3.37052e-10	5.2361e-11	4.8711e-11	4.4672e-11
2024-05-29T18:05:00.334	4.10431e-09	9.01205e-10	5.56757e-10	3.69721e-10	2.46099e-10	1.35207e-10	9.6365e-11	1.57842e-10	8.8848e-11	9.1278e-11	9.5006e-11	1.01098e-10	1.21073e-10	8.6678e-11	6.9216e-11	9.0093e-11	7.1417e-11	4.5555e-11	4.60145e-10	9.5263e-11	1.02643e-10	5.9583e-11	4.0678e-11	1.19129e-10	1.12361e-10	8.1096e-11	1.17076e-10	4.10339e-10	8.8606e-11	8.9293e-11	4.3203e-11	9.2259e-11	7.3662e-11	5.9786e-11	8.3445e-11	5.5146e-11	5.2454e-11	6.4778e-11	4.2141e-11	4.6504e-11	4.2748e-11	5.0913e-11	8.215e-11	7.5435e-11	4.3797e-11	2.7847e-11	7.6648e-11	4.4467e-11	9.1551e-11
2024-05-29T18:05:03.785	3.61774e-09	9.27502e-10	4.48569e-10	2.96337e-10	1.72052e-10	1.83903e-10	9.9242e-11	1.44701e-10	1.19416e-10	5.03437e-10	6.3337e-11	9.8602e-11	5.2278e-11	7.4227e-11	8.6974e-11	7.638e-11	1.05928e-10	6.6407e-11	6.691e-11	1.03327e-10	9.0024e-11	7.2033e-11	1.05031e-10	5.2751e-11	7.1063e-11	7.1741e-11	1.0103e-10	6.2133e-11	5.7633e-11	5.2535e-11	6.5993e-11	5.8887e-11	0	9.1916e-11	3.1539e-11	4.3422e-10	5.2454e-11	6.7423e-11	4.2141e-11	5.6956e-11	6.8929e-11	5.4428e-11	5.8089e-11	7.2877e-11	7.3286e-11	9.6465e-11	4.8477e-11	5.6247e-11	3.9956e-11
2024-05-29T18:05:07.246	3.81173e-09	1.06243e-09	5.791e-10	2.70772e-10	1.50986e-10	1.49138e-10	1.7433e-10	5.1482e-11	4.47099e-10	7.106e-11	1.1084e-10	9.2064e-11	1.17955e-10	5.0044e-11	6.3517e-11	7.8023e-11	9.1737e-11	3.18885e-10	4.59e-11	1.17811e-10	7.3504e-11	6.4002e-11	5.2516e-11	7.6444e-11	5.8023e-11	1.056e-10	1.34461e-10	7.897e-11	9.3578e-11	7.4296e-11	5.5775e-11	7.5329e-11	6.6847e-11	4.4155e-11	2.64505e-10	0	6.6866e-11	4.9475e-11	4.2141e-11	7.8278e-11	6.3405e-11	3.333e-11	7.9836e-11	5.509e-11	3.9173e-11	4.8232e-11	3.4278e-11	6.2886e-11	4.8936e-11
2024-05-29T18:05:10.700	3.46572e-09	1.10978e-09	5.10915e-10	2.70006e-10	2.01221e-10	7.6086e-11	1.51904e-10	1.39097e-10	9.027e-11	7.9447e-11	8.8162e-11	1.09389e-10	7.722e-11	9.6261e-11	8.6974e-11	9.149e-11	1.02254e-10	7.2029e-11	5.8511e-11	8.6449e-11	4.6488e-11	5.7246e-11	7.6102e-11	9.1368e-11	1.00499e-10	3.94759e-10	9.9577e-11	8.6163e-11	5.4951e-11	7.0047e-11	5.5775e-11	6.1506e-11	7.3662e-11	7.8574e-11	3.1539e-11	6.3677e-11	6.4243e-11	4.9475e-11	3.2643e-11	6.0037e-11	3.3112e-11	6.9382e-11	1.9363e-11	3.77679e-10	5.8759e-11	3.9382e-11	4.8477e-11	1.9886e-11	8.2371e-11
2024-05-29T18:05:14.160	4.81115e-09	8.24576e-10	3.00054e-10	2.46761e-10	2.09505e-10	1.20934e-10	1.02038e-10	1.11611e-10	9.7067e-11	1.3294e-10	6.902e-11	8.6479e-11	8.6334e-11	8.223e-11	7.2768e-11	1.12616e-10	3.78577e-10	3.6014e-11	6.285e-11	4.6209e-11	8.8511e-11	7.7511e-11	8.3035e-11	9.8688e-11	5.8023e-11	1.72445e-10	1.08006e-10	5.1698e-11	4.5975e-11	7.2203e-11	4.9886e-11	5.3266e-11	3.0944e-11	6.9814e-11	5.4628e-11	9.373e-11	5.5636e-11	3.2389e-11	4.6164e-11	4.6504e-11	4.6828e-11	7.2001e-11	9.4859e-11	5.1532e-11	4.3797e-11	4.403e-11	3.4278e-11	6.8888e-11	5.6506e-11
2024-05-29T18:05:17.617	3.68025e-09	9.65605e-10	5.72805e-10	1.8542e-10	2.28908e-10	1.39643e-10	1.19797e-10	8.7671e-11	1.35405e-10	6.1539e-11	1.16358e-10	9.4733e-11	9.4574e-11	6.3301e-11	6.737e-11	4.58832e-10	8.5997e-11	1.03129e-10	6.285e-11	8.9484e-11	7.5319e-11	7.9253e-11	3.7134e-11	6.8779e-11	4.28349e-10	1.2878e-10	9.9577e-11	6.4479e-11	7.3725e-11	4.6332e-11	5.2912e-11	6.6434e-11	6.9193e-11	9.3667e-11	4.4603e-11	5.8129e-11	6.6866e-11	3.2389e-11	2.6653e-11	7.1036e-11	5.7352e-11	5.4428e-11	8.215e-11	5.8432e-11	5.8759e-11	5.9072e-11	4.8477e-11	5.9659e-11	8.4759e-11
2024-05-29T18:05:21.076	4.85295e-09	1.07057e-09	4.76651e-10	2.61432e-10	1.13708e-10	1.62812e-10	1.26648e-10	1.34249e-10	1.17264e-10	1.07767e-10	1.00145e-10	9.07e-11	7.722e-11	6.898e-11	4.47164e-10	6.5666e-11	9.5816e-11	5.8071e-11	9.4625e-11	6.9314e-11	8.3808e-11	5.4809e-11	5.7528e-11	4.41663e-10	5.8023e-11	1.2426e-10	9.9577e-11	7.3112e-11	3.0098e-11	6.5523e-11	5.5775e-11	8.3279e-11	5.0532e-11	5.0986e-11	7.0524e-11	7.1193e-11	6.1508e-11	4.1814e-11	3.2643e-11	7.3529e-11	8.3331e-11	2.7214e-11	3.8726e-11	6.4599e-11	6.4961e-11	4.8232e-11	5.5976e-11	8.6682e-11	6.626e-11
2024-05-29T18:05:24.535	3.90595e-09	1.10254e-09	3.49368e-10	2.70772e-10	1.76927e-10	5.06204e-10	1.61772e-10	1.77595e-10	1.05851e-10	8.703e-11	7.5939e-11	8.9315e-11	8.6334e-11	7.5895e-11	8.5512e-11	1.20241e-10	1.10639e-10	6.4424e-11	6.072e-11	7.6629e-11	1.05242e-10	8.4264e-11	7.0457e-11	3.7301e-11	1.2194e-10	1.19569e-10	1.21956e-10	5.9696e-11	5.7633e-11	4.2895e-11	6.5993e-11	4.12977e-10	5.3597e-11	1.11121e-10	5.4628e-11	7.5791e-11	5.8645e-11	6.4778e-11	5.3305e-11	6.0037e-11	7.647e-11	5.0913e-11	3.8726e-11	5.1532e-11	5.1821e-11	4.8232e-11	2.7988e-11	3.4444e-11	6.626e-11
2024-05-29T18:05:27.993	4.45966e-09	7.6578e-10	5.1621e-10	2.49266e-10	5.13512e-10	1.58065e-10	1.3833e-10	1.04244e-10	1.11703e-10	8.102e-11	1.22651e-10	7.5721e-11	6.1047e-11	7.252e-11	9.5276e-11	1.46833e-10	1.04718e-10	7.8904e-11	6.285e-11	7.1213e-11	9.2976e-11	4.51663e-10	6.2137e-11	1.09387e-10	9.9093e-11	1.25405e-10	1.44905e-10	6.4479e-11	3.4754e-11	8.0249e-11	4.0374e-10	6.4017e-11	8.7524e-11	3.6052e-11	6.0393e-11	7.3528e-11	6.939e-11	5.2891e-11	7.5385e-11	8.9049e-11	6.3405e-11	6.3822e-11	5.8089e-11	4.7709e-11	5.1821e-11	1.9691e-11	4.4253e-11	2.8123e-11	8.4759e-11
2024-05-29T18:05:31.461	3.32898e-09	1.05423e-09	5.39113e-10	4.93102e-10	1.92581e-10	1.5317e-10	1.13773e-10	1.30241e-10	9.7067e-11	9.5337e-11	7.9172e-11	9.2064e-11	9.0548e-11	7.0772e-11	8.4025e-11	7.1225e-11	7.1417e-11	6.8332e-11	4.8684e-11	6.7361e-11	4.10901e-10	6.1833e-11	1.17429e-10	7.2713e-11	6.6999e-11	1.48381e-10	1.06647e-10	4.5593e-11	6.9508e-11	4.3639e-10	6.8309e-11	1.10881e-10	7.9898e-11	4.7693e-11	6.5654e-11	1.8382e-11	7.1825e-11	5.9134e-11	5.6539e-11	6.0037e-11	4.2748e-11	5.4428e-11	5.8089e-11	8.49e-11	2.7699e-11	5.5694e-11	5.5976e-11	9.5371e-11	5.2857e-11
2024-05-29T18:05:34.914	4.24463e-09	1.04404e-09	5.97081e-10	2.13459e-10	1.96083e-10	1.22187e-10	1.2327e-10	1.4099e-10	8.2918e-11	8.5567e-11	6.3337e-11	7.4056e-11	3.861e-11	7.5895e-11	9.1219e-11	9.0093e-11	9.5816e-11	9.5285e-11	2.8108e-11	9.3851e-11	6.3656e-11	4.0479e-11	9.3943e-11	8.9832e-11	7.8563e-11	1.06946e-10	8.7077e-11	4.2211e-11	4.07899e-10	3.5023e-11	6.1098e-11	5.8887e-11	2.5266e-11	1.8026e-11	3.6418e-11	5.8129e-11	6.6866e-11	1.4118e-10	3.2643e-11	5.3698e-11	6.3405e-11	5.7729e-11	7.245e-11	7.7909e-11	6.4961e-11	3.9382e-11	3.76543e-10	7.1701e-11	7.2032e-11
2024-05-29T18:05:38.369	3.71694e-09	9.61446e-10	5.79621e-10	2.23877e-10	2.06231e-10	1.71915e-10	1.15003e-10	1.27149e-10	1.42729e-10	5.729e-11	5.01691e-10	1.08243e-10	6.1047e-11	9.7553e-11	5.7254e-11	6.5666e-11	5.5319e-11	6.2378e-11	3.2456e-11	5.6594e-11	7.7092e-11	8.0958e-11	8.1357e-11	7.6444e-11	1.01885e-10	1.23104e-10	1.23146e-10	5.7154e-11	6.2654e-11	6.5523e-11	7.055e-11	4.6976e-11	6.4416e-11	3.1222e-11	4.4603e-11	5.5146e-11	4.21674e-10	5.2891e-11	7.299e-11	3.2883e-11	5.4072e-11	3.333e-11	6.422e-11	6.1593e-11	3.3925e-11	3.2949e-10	3.4278e-11	5.6247e-11	5.2857e-11
2024-05-29T18:05:41.828	4.2715e-09	6.10483e-10	4.50585e-10	2.82746e-10	2.00374e-10	1.52172e-10	1.18617e-10	1.61165e-10	6.7703e-11	1.43885e-10	6.5287e-11	8.9315e-11	1.30932e-10	8.6678e-11	9.2591e-11	9.0093e-11	7.9847e-11	4.5555e-11	4.48259e-10	9.9377e-11	1.1268e-10	7.5729e-11	4.9821e-11	8.827e-11	5.0249e-11	1.15926e-10	1.03877e-10	4.08526e-10	4.5975e-11	9.0994e-11	6.1098e-11	7.3207e-11	4.7268e-11	3.6052e-11	7.9372e-11	4.5026e-11	8.0837e-11	4.1814e-11	4.9862e-11	3.797e-11	5.7352e-11	4.7136e-11	6.1231e-11	3.3736e-11	8.3098e-11	1.9691e-11	4.8477e-11	5.6247e-11	6.3176e-11
2024-05-29T18:05:45.286	4.695e-09	9.94232e-10	5.01365e-10	2.50096e-10	1.67035e-10	1.88e-10	1.25532e-10	9.3522e-11	5.32612e-10	5.5043e-11	1.09703e-10	8.9315e-11	1.12566e-10	4.187e-11	5.2666e-11	6.9421e-11	9.1737e-11	4.78869e-10	5.8511e-11	8.0037e-11	8.5404e-11	6.6102e-11	7.2388e-11	7.8243e-11	1.07251e-10	1.49342e-10	1.27794e-10	7.7067e-11	9.9824e-11	4.9531e-11	5.8497e-11	8.6983e-11	5.0532e-11	6.7448e-11	2.14684e-10	8.2207e-11	8.2937e-11	7.7101e-11	7.299e-11	5.6956e-11	4.2748e-11	5.0913e-11	7.7452e-11	6.7471e-11	3.3925e-11	4.8232e-11	5.2361e-11	6.8888e-11	3.4603e-11
2024-05-29T18:05:48.745	3.69834e-09	1.00226e-09	4.45867e-10	2.33832e-10	1.95213e-10	1.38536e-10	1.39343e-10	1.27149e-10	9.9655e-11	7.106e-11	8.2278e-11	8.7909e-11	1.33749e-10	4.7476e-11	5.5007e-11	8.8674e-11	4.87783e-10	7.0205e-11	9.18e-11	7.6629e-11	5.9261e-11	4.6741e-11	4.6971e-11	7.0773e-11	9.9093e-11	1.2654e-10	1.32279e-10	8.2645e-11	6.5019e-11	4.2895e-11	2.4943e-11	6.1506e-11	7.7875e-11	7.2105e-11	4.0717e-11	6.0966e-11	3.709e-11	4.9475e-11	1.8846e-11	1.8985e-11	5.058e-11	5.4428e-11	7.4992e-11	6.4599e-11	7.5857e-11	0	7.9163e-11	5.9659e-11	5.2857e-11
2024-05-29T18:05:52.202	2.96756e-09	9.72497e-10	5.3007e-10	2.8054e-10	1.76927e-10	1.65596e-10	5.62899e-10	5.1482e-11	6.3831e-11	1.16763e-10	1.28639e-10	9.2064e-11	6.1047e-11	1.01331e-10	9.1219e-11	8.1209e-11	1.15156e-10	7.5544e-11	4.59e-11	5.6594e-11	9.0024e-11	8.2627e-11	2.8764e-11	5.2751e-11	6.9061e-11	1.23104e-10	1.19541e-10	5.4494e-11	8.3338e-11	4.6332e-11	8.2727e-11	8.5151e-11	6.1889e-11	7.6479e-11	3.6418e-11	4.1103e-11	6.4243e-11	5.6099e-11	7.0516e-11	3.2883e-11	6.3405e-11	3.54304e-10	3.8726e-11	3.8955e-11	5.8759e-11	7.3676e-11	4.4253e-11	6.5955e-11	4.4672e-11
2024-05-29T18:05:55.661	5.13473e-09	7.41857e-10	4.02415e-10	2.62224e-10	1.6291e-10	1.48113e-10	1.0065e-10	1.37179e-10	7.8176e-11	8.4079e-11	1.1084e-10	6.115e-11	8.6334e-11	5.482e-11	4.55821e-10	1.03214e-10	1.08309e-10	9.5285e-11	5.6216e-11	7.3063e-11	6.1498e-11	7.9253e-11	6.8472e-11	4.56229e-10	8.7034e-11	1.08274e-10	1.02463e-10	6.4479e-11	5.7633e-11	8.579e-11	6.5993e-11	7.5329e-11	8.3798e-11	4.0308e-11	4.8177e-11	6.0966e-11	7.8681e-11	1.02423e-10	7.0516e-11	6.2967e-11	5.4072e-11	4.7136e-11	4.3297e-11	1.9477e-11	6.4961e-11	6.2268e-11	1.9791e-11	5.2614e-11	5.9934e-11
2024-05-29T18:05:59.119	3.64733e-09	1.1377e-09	7.70677e-10	3.27542e-10	1.41685e-10	8.9005e-11	1.17425e-10	9.0644e-11	1.52226e-10	9.265e-11	9.7609e-11	9.07e-11	6.8707e-11	4.37989e-10	4.4913e-11	1.06837e-10	8.8913e-11	9.3914e-11	3.975e-11	7.4867e-11	4.9308e-11	4.6741e-11	4.26639e-10	6.6726e-11	7.8563e-11	1.02857e-10	1.19541e-10	5.7154e-11	4.2565e-11	7.4296e-11	5.8497e-11	1.7755e-11	8.1871e-11	4.7693e-11	2.5752e-11	7.1193e-11	4.1468e-11	7.7101e-11	8.2149e-11	4.2452e-11	3.8235e-11	6.3822e-11	6.422e-11	2.7545e-11	5.5399e-11	3.4105e-11	3.9581e-11	6.2886e-11	5.6506e-11
2024-05-29T18:06:02.578	3.86784e-09	8.64127e-10	5.20871e-10	1.79748e-10	1.61862e-10	1.82239e-10	1.13773e-10	1.69188e-10	1.45381e-10	7.4528e-11	9.5006e-11	6.3156e-11	5.14396e-10	8.223e-11	1.11155e-10	1.19182e-10	9.0336e-11	2.7897e-11	7.0736e-11	9.3851e-11	1.03951e-10	4.69452e-10	3.3214e-11	9.2878e-11	8.0329e-11	1.13433e-10	9.3536e-11	5.1698e-11	5.7633e-11	6.3139e-11	6.5993e-11	5.0219e-11	5.3597e-11	5.0986e-11	6.3079e-11	5.8129e-11	6.1508e-11	5.2891e-11	7.7705e-11	8.0548e-11	3.8235e-11	5.7729e-11	7.245e-11	7.7909e-11	5.5399e-11	4.8232e-11	5.2361e-11	6.2886e-11	1.07585e-10
2024-05-29T18:06:06.037	3.44624e-09	1.00625e-09	4.20766e-10	5.80671e-10	2.05405e-10	1.10397e-10	1.08714e-10	6.0915e-11	1.07047e-10	5.2699e-11	1.2059e-10	8.5026e-11	8.6334e-11	1.07332e-10	7.2768e-11	1.00727e-10	1.00999e-10	5.8071e-11	4.8684e-11	1.12004e-10	7.7092e-11	6.6102e-11	4.9821e-11	8.9832e-11	1.14831e-10	1.2878e-10	9.3536e-11	6.2133e-11	5.4951e-11	4.15511e-10	3.0549e-11	8.8776e-11	7.9898e-11	8.455e-11	3.6418e-11	9.373e-11	6.939e-11	5.6099e-11	5.6539e-11	8.4905e-11	1.9117e-11	5.0913e-11	4.3297e-11	6.4599e-11	0	6.2268e-11	3.4278e-11	3.40399e-10	6.626e-11
2024-05-29T18:06:09.499	3.70373e-09	9.4745e-10	9.41825e-10	2.3822e-10	1.69059e-10	1.27077e-10	1.13773e-10	9.7681e-11	1.19416e-10	8.2564e-11	9.5006e-11	9.3408e-11	8.6334e-11	6.3301e-11	7.7792e-11	8.5766e-11	1.1292e-10	6.4424e-11	7.2574e-11	4.55987e-10	8.8511e-11	1.04516e-10	7.9644e-11	6.4606e-11	7.6757e-11	1.29885e-10	9.5082e-11	4.2211e-11	4.32337e-10	7.4296e-11	8.4586e-11	9.0534e-11	5.0532e-11	5.7004e-11	7.2837e-11	7.5791e-11	5.5636e-11	7.2423e-11	6.2506e-11	5.023e-11	5.058e-11	1.9243e-11	7.9836e-11	5.509e-11	7.5857e-11	2.7847e-11	7.6648e-11	6.5955e-11	6.3176e-11
2024-05-29T18:06:12.954	3.44233e-09	1.12591e-09	6.02119e-10	3.86697e-10	1.47567e-10	1.38536e-10	1.1253e-10	9.9028e-11	1.32554e-10	8.2564e-11	4.8907e-10	6.115e-11	8.1904e-11	6.129e-11	8.6974e-11	7.4701e-11	8.5997e-11	8.9675e-11	7.2574e-11	1.02027e-10	1.11475e-10	5.4809e-11	5.7528e-11	9.2878e-11	7.6757e-11	1.13433e-10	8.8736e-11	7.3112e-11	8.1506e-11	3.0331e-11	5.8497e-11	2.511e-11	6.6847e-11	9.3667e-11	4.4603e-11	7.1193e-11	4.12605e-10	6.202e-11	7.7705e-11	6.8452e-11	7.4041e-11	4.3029e-11	1.9363e-11	3.3736e-11	3.9173e-11	3.54435e-10	2.7988e-11	2.8123e-11	5.6506e-11
2024-05-29T18:06:16.412	4.21917e-09	9.18093e-10	3.51952e-10	2.28456e-10	1.74018e-10	1.7801e-10	1.06094e-10	1.38141e-10	9.3048e-11	4.81163e-10	9.3677e-11	1.17094e-10	8.4883e-11	8.0693e-11	1.10015e-10	8.1209e-11	1.23697e-10	7.0205e-11	5.8511e-11	1.26548e-10	1.25173e-10	5.7246e-11	3.7134e-11	8.9832e-11	8.7034e-11	1.34205e-10	1.14558e-10	6.6741e-11	7.9632e-11	4.2895e-11	4.9886e-11	5.6147e-11	6.1889e-11	3.1222e-11	4.4603e-11	4.25574e-10	4.9066e-11	8.5693e-11	5.3305e-11	5.3698e-11	3.3112e-11	4.7136e-11	9.6815e-11	3.8955e-11	3.24805e-10	2.7847e-11	5.2361e-11	4.8711e-11	4.4672e-11
2024-05-29T18:06:19.871	4.94912e-09	1.38355e-09	5.39673e-10	4.21056e-10	2.20581e-10	8.1873e-11	9.188e-11	8.7671e-11	5.04596e-10	9.5337e-11	1.32479e-10	9.2064e-11	1.14752e-10	6.7141e-11	5.9415e-11	9.149e-11	9.8441e-11	7.5544e-11	6.885e-11	8.798e-11	1.02643e-10	7.0112e-11	5.7528e-11	7.6444e-11	7.8563e-11	1.54979e-10	9.1964e-11	9.5947e-11	4.5975e-11	6.0662e-11	4.9886e-11	6.6434e-11	9.621e-11	6.4994e-11	3.86705e-10	7.1193e-11	6.1508e-11	6.7423e-11	4.9862e-11	7.8278e-11	3.8235e-11	4.3029e-11	5.8089e-11	3.63344e-10	3.9173e-11	5.5694e-11	2.7988e-11	8.1993e-11	3.9956e-11
2024-05-29T18:06:23.329	4.33099e-09	8.24576e-10	3.49368e-10	2.23877e-10	1.6291e-10	1.36328e-10	1.03408e-10	8.1401e-11	1.22573e-10	9.265e-11	7.5939e-11	8.3547e-11	9.0548e-11	8.5221e-11	7.7792e-11	8.4274e-11	4.34999e-10	3.6014e-11	7.6116e-11	8.1687e-11	1.06518e-10	4.9576e-11	5.9877e-11	1.19129e-10	9.1742e-11	1.20759e-10	1.38736e-10	8.4422e-11	4.915e-11	4.9531e-11	3.9439e-11	6.4017e-11	1.7866e-11	6.7448e-11	7.9372e-11	6.8779e-11	5.5636e-11	3.7399e-11	4.2141e-11	5.3698e-11	7.8823e-11	1.9243e-11	3.3538e-11	5.509e-11	6.1938e-11	3.4105e-11	4.4253e-11	5.9659e-11	0
2024-05-29T18:06:26.789	3.62887e-09	9.82065e-10	5.66973e-10	3.26909e-10	1.79788e-10	1.13123e-10	1.1622e-10	1.0921e-10	1.02179e-10	8.9884e-11	1.19546e-10	7.5721e-11	9.4574e-11	5.0044e-11	5.2666e-11	4.71376e-10	1.04718e-10	8.369e-11	5.6216e-11	9.8024e-11	6.1498e-11	7.5729e-11	6.2137e-11	4.4135e-11	4.30635e-10	1.56813e-10	1.03877e-10	4.8741e-11	4.5975e-11	7.8315e-11	4.9886e-11	5.3266e-11	6.4416e-11	4.7693e-11	7.0524e-11	3.1839e-11	6.939e-11	6.7423e-11	6.5285e-11	7.3529e-11	6.0454e-11	4.7136e-11	5.4767e-11	2.7545e-11	3.9173e-11	6.8211e-11	5.9372e-11	1.07091e-10	7.4751e-11
2024-05-29T18:06:30.251	3.54067e-09	1.21878e-09	5.39113e-10	2.20146e-10	1.67035e-10	1.22187e-10	1.31014e-10	1.0921e-10	1.56352e-10	1.00494e-10	6.7179e-11	9.3408e-11	7.8812e-11	9.3623e-11	4.5665e-10	6.9421e-11	8.4502e-11	7.8904e-11	8.8885e-11	9.9377e-11	4.3486e-11	6.6102e-11	5.7528e-11	4.58966e-10	1.05935e-10	1.38411e-10	9.3536e-11	4.8741e-11	9.1951e-11	5.2535e-11	4.9886e-11	4.3491e-11	6.6847e-11	8.0615e-11	2.5752e-11	7.3528e-11	2.6227e-11	6.202e-11	5.6539e-11	7.5941e-11	6.8929e-11	6.3822e-11	6.9814e-11	3.8955e-11	6.7849e-11	5.2097e-11	2.7988e-11	6.5955e-11	9.5811e-11
2024-05-29T18:06:33.708	3.37717e-09	9.10789e-10	5.39113e-10	2.99119e-10	4.93923e-10	1.25872e-10	1.2885e-10	1.31254e-10	1.094e-10	1.02975e-10	7.0813e-11	3.5305e-11	7.0492e-11	5.7059e-11	9.5276e-11	1.08017e-10	4.5168e-11	7.7242e-11	4.59e-11	6.3274e-11	7.3504e-11	6.4002e-11	5.2516e-11	8.6679e-11	8.0329e-11	1.86006e-10	9.6603e-11	7.5115e-11	4.2565e-11	6.3139e-11	7.688e-11	5.8887e-11	3.5731e-11	6.7448e-11	9.2849e-11	6.0966e-11	7.6464e-11	6.4778e-11	5.6539e-11	3.83013e-10	4.6828e-11	9.2287e-11	3.8726e-11	9.341e-11	6.4961e-11	4.403e-11	4.4253e-11	5.2614e-11	3.39038e-10
2024-05-29T18:06:37.163	3.83462e-09	9.27502e-10	5.05565e-10	2.56635e-10	5.45637e-10	1.03267e-10	1.2885e-10	8.1401e-11	7.4848e-11	8.703e-11	1.00145e-10	8.6479e-11	7.3932e-11	7.5895e-11	7.6154e-11	5.2822e-11	1.10639e-10	7.8904e-11	6.885e-11	1.0461e-10	8.052e-11	9.6359e-11	7.2388e-11	6.4606e-11	6.6999e-11	1.53123e-10	1.31172e-10	8.6163e-11	6.2654e-11	8.0249e-11	3.73732e-10	5.6147e-11	1.33695e-10	5.7004e-11	7.0524e-11	6.8779e-11	2.6227e-11	6.9968e-11	7.9958e-11	3.58715e-10	3.8235e-11	5.4428e-11	6.422e-11	3.3736e-11	5.5399e-11	3.9382e-11	7.9163e-11	7.1701e-11	3.331e-10
2024-05-29T18:06:40.621	3.86436e-09	8.83239e-10	4.26472e-10	2.86385e-10	2.26667e-10	1.03267e-10	1.24406e-10	8.917e-11	1.47985e-10	5.729e-11	7.2562e-11	1.29238e-10	4.49713e-10	7.4227e-11	9.1219e-11	7.9632e-11	1.18432e-10	5.5793e-11	1.12431e-10	8.6449e-11	9.2976e-11	4.58563e-10	4.3938e-11	6.8779e-11	6.0392e-11	1.21937e-10	8.3661e-11	8.9543e-11	8.3338e-11	7.8315e-11	7.483e-11	9.7249e-11	6.6847e-11	6.7448e-11	1.8209e-11	7.5791e-11	6.4243e-11	6.202e-11	4.2141e-11	7.3529e-11	1.9117e-11	2.7214e-11	8.215e-11	4.3553e-11	6.7849e-11	4.403e-11	1.9791e-11	5.2614e-11	4.8936e-11
2024-05-29T18:06:44.086	5.10184e-09	8.11512e-10	5.26639e-10	5.74214e-10	1.52109e-10	1.57098e-10	1.24406e-10	1.22912e-10	9.167e-11	9.6652e-11	6.5287e-11	8.6479e-11	8.0373e-11	5.482e-11	8.5512e-11	1.33249e-10	5.7578e-11	5.3418e-11	4.8684e-11	9.6653e-11	7.1643e-11	6.1833e-11	4.9821e-11	8.5059e-11	1.12361e-10	1.40462e-10	1.14558e-10	8.6163e-11	6.5019e-11	3.91965e-10	5.5775e-11	8.5151e-11	5.9254e-11	4.4155e-11	7.0524e-11	5.8129e-11	7.4181e-11	8.151e-11	5.9597e-11	6.2967e-11	5.7352e-11	6.0852e-11	3.8726e-11	6.7471e-11	8.5375e-11	4.403e-11	4.8477e-11	2.62318e-10	1.9978e-11
2024-05-29T18:06:47.537	3.94198e-09	9.28221e-10	5.78578e-10	2.21085e-10	2.07055e-10	1.30624e-10	1.18617e-10	1.25049e-10	1.33511e-10	1.0659e-10	1.45985e-10	4.75767e-10	7.5594e-11	1.39764e-10	9.9166e-11	7.2984e-11	9.5816e-11	6.2378e-11	5.3822e-11	9.9377e-11	4.85629e-10	8.2627e-11	1.19754e-10	4.0861e-11	8.7034e-11	1.17153e-10	8.3661e-11	5.9696e-11	7.5745e-11	7.2203e-11	4.9886e-11	5.8887e-11	4.3762e-11	5.4078e-11	4.0717e-11	4.1103e-11	7.6464e-11	5.6099e-11	4.9862e-11	4.6504e-11	6.8929e-11	6.9382e-11	6.422e-11	3.3736e-11	6.1938e-11	3.4105e-11	5.9372e-11	6.5955e-11	5.6506e-11
2024-05-29T18:06:50.996	3.93e-09	9.59359e-10	6.78554e-10	2.15391e-10	2.20581e-10	9.7187e-11	6.9165e-11	9.7681e-11	1.24631e-10	1.04194e-10	9.7609e-11	8.9315e-11	7.3932e-11	7.5895e-11	6.3517e-11	1.05643e-10	1.00999e-10	7.2029e-11	5.1318e-11	9.9377e-11	6.7768e-11	8.0958e-11	4.3938e-11	9.8688e-11	8.2057e-11	1.17153e-10	1.03877e-10	9.2801e-11	4.20296e-10	3.5023e-11	9.4981e-11	5.0219e-11	4.3762e-11	3.6052e-11	6.5654e-11	8.6219e-11	4.9066e-11	4.9475e-11	4.2141e-11	4.6504e-11	6.6225e-11	7.2001e-11	3.8726e-11	7.2877e-11	4.3797e-11	4.8232e-11	4.8477e-11	7.7019e-11	3.4603e-11
2024-05-29T18:06:54.462	3.47736e-09	1.01944e-09	5.295e-10	3.03245e-10	1.48716e-10	1.59981e-10	1.25532e-10	1.0799e-10	1.15072e-10	9.1278e-11	4.60831e-10	8.0508e-11	8.6334e-11	5.9212e-11	6.737e-11	6.5666e-11	1.08309e-10	6.4424e-11	7.7827e-11	9.5263e-11	9.4418e-11	5.4809e-11	7.4268e-11	9.1368e-11	7.6757e-11	1.19569e-10	1.05271e-10	7.897e-11	4.915e-11	8.2137e-11	1.7637e-11	9.2259e-11	5.6496e-11	5.9786e-11	6.0393e-11	5.1992e-11	3.96452e-10	6.4778e-11	7.0516e-11	8.0548e-11	7.647e-11	7.4528e-11	4.7429e-11	2.7545e-11	4.3797e-11	3.34744e-10	1.9791e-11	6.5955e-11	7.9912e-11
2024-05-29T18:06:57.913	3.54827e-09	1.05359e-09	4.43829e-10	2.63798e-10	1.64985e-10	1.46042e-10	7.6873e-11	1.10417e-10	1.05851e-10	6.7413e-11	5.24688e-10	8.0508e-11	9.8436e-11	8.0693e-11	5.2666e-11	9.4221e-11	1.18432e-10	5.8071e-11	9.7368e-11	6.3274e-11	5.1975e-11	7.0112e-11	5.7528e-11	5.2751e-11	7.1063e-11	1.47415e-10	1.19541e-10	5.7154e-11	7.7713e-11	2.4765e-11	6.1098e-11	5.3266e-11	3.9949e-11	6.4994e-11	6.8133e-11	5.1992e-11	4.02051e-10	2.6445e-11	6.5285e-11	3.797e-11	7.4041e-11	7.2001e-11	5.8089e-11	5.1532e-11	7.3286e-11	3.5224e-10	5.2361e-11	6.5955e-11	4.8936e-11
2024-05-29T18:07:01.373	4.07633e-09	1.08606e-09	6.38644e-10	2.29361e-10	1.53223e-10	1.74553e-10	1.1622e-10	1.05507e-10	7.3127e-11	4.45754e-10	9.0961e-11	9.07e-11	9.0548e-11	6.7141e-11	5.7254e-11	6.5666e-11	7.6586e-11	7.7242e-11	7.0736e-11	6.1129e-11	8.052e-11	5.7246e-11	4.6971e-11	8.1722e-11	6.9061e-11	1.6568e-10	9.6603e-11	9.1187e-11	8.1506e-11	7.6332e-11	4.6664e-11	6.8765e-11	6.6847e-11	4.7693e-11	3.6418e-11	3.87332e-10	6.1508e-11	6.4778e-11	3.2643e-11	0	9.1684e-11	7.4528e-11	7.7452e-11	4.3553e-11	3.48727e-10	4.8232e-11	4.8477e-11	1.9886e-11	7.9912e-11
2024-05-29T18:07:04.834	3.89732e-09	9.82065e-10	4.82948e-10	2.70006e-10	1.61862e-10	1.42878e-10	1.06094e-10	1.46521e-10	4.78995e-10	1.11226e-10	8.2278e-11	6.8822e-11	1.11457e-10	6.5249e-11	7.448e-11	6.9421e-11	4.7908e-11	1.47615e-10	6.285e-11	9.3851e-11	7.8825e-11	7.9253e-11	3.7134e-11	6.8779e-11	7.6757e-11	9.4149e-11	1.35535e-10	7.7067e-11	8.1506e-11	2.4765e-11	8.2727e-11	5.6147e-11	7.5798e-11	6.4994e-11	3.56362e-10	4.5026e-11	4.1468e-11	6.9968e-11	2.6653e-11	3.2883e-11	4.6828e-11	5.4428e-11	6.1231e-11	8.0307e-11	8.5375e-11	5.2097e-11	4.4253e-11	6.8888e-11	8.4759e-11
2024-05-29T18:07:08.289	4.54934e-09	9.10055e-10	5.89442e-10	2.71536e-10	1.96083e-10	1.75424e-10	1.56466e-10	5.52805e-10	1.20477e-10	1.22049e-10	6.5287e-11	9.604e-11	8.7761e-11	1.11901e-10	4.2013e-11	1.24386e-10	7.6586e-11	1.03129e-10	4.59e-11	8.4892e-11	1.13872e-10	4.6741e-11	7.6102e-11	8.6679e-11	8.8631e-11	1.48381e-10	1.05271e-10	1.06229e-10	5.2131e-11	3.9157e-11	7.2721e-11	7.1021e-11	3.9949e-11	1.01971e-10	4.0717e-11	1.28674e-10	6.939e-11	8.5693e-11	5.6539e-11	8.2755e-11	5.058e-11	2.7214e-11	3.35935e-10	5.1532e-11	8.5375e-11	6.2268e-11	4.4253e-11	7.4408e-11	5.6506e-11
2024-05-29T18:07:11.754	3.55585e-09	1.08729e-09	5.78578e-10	3.39344e-10	1.90806e-10	1.8473e-10	1.07412e-10	1.31254e-10	1.18345e-10	1.07767e-10	7.427e-11	9.07e-11	8.9166e-11	5.7059e-11	8.5512e-11	4.68948e-10	7.1417e-11	7.3808e-11	4.59e-11	8.1687e-11	9.5838e-11	6.1833e-11	6.8472e-11	4.7182e-11	4.1335e-10	1.84462e-10	1.10673e-10	5.7154e-11	9.9824e-11	4.2895e-11	4.3203e-11	3.0753e-11	5.3597e-11	7.6479e-11	5.7583e-11	3.1839e-11	5.5636e-11	6.7423e-11	2.6653e-11	6.8452e-11	6.3405e-11	2.7214e-11	5.8089e-11	5.8432e-11	0	2.7847e-11	6.5638e-11	6.5955e-11	5.9934e-11
2024-05-29T18:07:15.207	4.47623e-09	8.35039e-10	3.78424e-10	2.55827e-10	1.85379e-10	1.49138e-10	1.03408e-10	1.53586e-10	1.26649e-10	9.9229e-11	6.7179e-11	6.3156e-11	1.06906e-10	7.7527e-11	4.66213e-10	8.7232e-11	1.24722e-10	3.9452e-11	7.7827e-11	6.1129e-11	9.0024e-11	6.4002e-11	6.6428e-11	4.84623e-10	1.00499e-10	1.20759e-10	9.9577e-11	7.897e-11	5.4951e-11	8.0249e-11	4.6664e-11	5.8887e-11	8.9329e-11	4.7693e-11	9.1046e-11	3.1839e-11	6.4243e-11	6.9968e-11	6.7951e-11	5.023e-11	7.4041e-11	4.3029e-11	4.3297e-11	6.7471e-11	4.3797e-11	4.403e-11	8.3965e-11	9.5371e-11	5.9934e-11
2024-05-29T18:07:18.665	4.01643e-09	1.21439e-09	6.35799e-10	2.97035e-10	1.59746e-10	9.8742e-11	1.07412e-10	1.54447e-10	4.222e-11	8.9884e-11	7.5939e-11	7.8944e-11	1.17955e-10	3.165e-11	6.737e-11	6.9421e-11	1.32651e-10	6.4424e-11	4.2935e-11	9.5263e-11	1.06518e-10	5.9583e-11	4.6971e-11	6.8779e-11	1.13602e-10	1.32066e-10	1.03877e-10	5.7154e-11	6.5019e-11	7.2203e-11	2.4943e-11	6.6434e-11	5.0532e-11	5.4078e-11	6.0393e-11	5.8129e-11	6.1508e-11	1.87e-11	2.6653e-11	7.8278e-11	3.75597e-10	5.0913e-11	5.4767e-11	7.2877e-11	9.5954e-11	5.9072e-11	5.5976e-11	9.113e-11	4.8936e-11
2024-05-29T18:07:22.126	4.96134e-09	9.23894e-10	4.10591e-10	2.79059e-10	5.14505e-10	9.7187e-11	1.472e-10	1.04244e-10	1.15072e-10	5.5043e-11	7.9172e-11	5.2366e-11	1.05738e-10	8.3739e-11	9.1219e-11	3.9011e-11	9.9728e-11	6.2378e-11	5.3822e-11	6.7361e-11	9.7237e-11	8.0958e-11	6.4318e-11	7.0773e-11	6.2672e-11	1.2426e-10	1.03877e-10	5.4494e-11	6.9508e-11	8.7559e-11	3.89625e-10	5.3266e-11	8.1871e-11	4.0308e-11	3.1539e-11	4.5026e-11	9.0853e-11	5.6099e-11	3.7692e-11	8.9049e-11	5.4072e-11	1.9243e-11	4.7429e-11	5.1532e-11	4.7977e-11	5.5694e-11	4.4253e-11	1.07091e-10	8.4759e-11
2024-05-29T18:07:25.585	4.42328e-09	1.29735e-09	3.81602e-10	5.2563e-10	1.85379e-10	1.55146e-10	9.9242e-11	1.37179e-10	1.33511e-10	6.926e-11	8.6728e-11	8.7909e-11	6.8707e-11	8.3739e-11	7.2768e-11	1.21291e-10	9.1737e-11	7.2029e-11	7.7827e-11	7.1213e-11	1.01319e-10	7.2033e-11	6.8472e-11	6.4606e-11	4.7375e-11	1.34205e-10	9.5082e-11	7.1052e-11	5.2131e-11	4.05047e-10	5.8497e-11	7.3207e-11	6.6847e-11	5.0986e-11	4.8177e-11	7.1193e-11	4.5426e-11	7.4799e-11	3.7692e-11	5.3698e-11	3.3112e-11	4.7136e-11	3.3538e-11	6.7471e-11	5.1821e-11	6.8211e-11	5.9372e-11	7.1701e-11	5.2857e-11
2024-05-29T18:07:29.048	4.35115e-09	7.80466e-10	4.67047e-10	3.03927e-10	2.19033e-10	1.22187e-10	1.9273e-10	9.9028e-11	1.23606e-10	8.5567e-11	5.4852e-11	1.4122e-10	1.2998e-10	9.8828e-11	7.9396e-11	6.9421e-11	1.00999e-10	5.3418e-11	7.0736e-11	6.3274e-11	8.052e-11	7.0112e-11	6.4318e-11	4.7182e-11	5.0249e-11	1.60419e-10	1.11983e-10	9.5947e-11	7.3725e-11	1.03601e-10	5.5775e-11	6.8765e-11	6.4416e-11	3.1222e-11	0	5.5146e-11	6.939e-11	3.94471e-10	4.2141e-11	6.8452e-11	6.3405e-11	7.4528e-11	7.245e-11	4.3553e-11	5.5399e-11	4.8232e-11	3.54026e-10	3.9773e-11	6.3176e-11
2024-05-29T18:07:32.498	3.77088e-09	1.02532e-09	4.3766e-10	1.57648e-10	2.15114e-10	1.34076e-10	1.24406e-10	9.4929e-11	1.07047e-10	6.7413e-11	4.67046e-10	7.7349e-11	8.7761e-11	7.5895e-11	8.4025e-11	1.25399e-10	1.41938e-10	8.9675e-11	7.7827e-11	8.798e-11	1.10256e-10	6.1833e-11	5.5079e-11	6.2416e-11	1.00499e-10	1.43483e-10	1.11983e-10	6.6741e-11	6.2654e-11	4.9531e-11	7.483e-11	7.7393e-11	7.5798e-11	6.4994e-11	7.9372e-11	7.7988e-11	4.24114e-10	1.87e-11	6.7951e-11	5.3698e-11	6.0454e-11	4.3029e-11	6.1231e-11	7.7909e-11	5.1821e-11	3.48922e-10	4.4253e-11	5.6247e-11	4.8936e-11
2024-05-29T18:07:35.958	4.00467e-09	1.0089e-09	5.27785e-10	2.64582e-10	2.31126e-10	1.04732e-10	8.218e-11	1.6034e-10	1.03417e-10	4.6624e-10	8.2278e-11	1.349e-10	9.4574e-11	7.9126e-11	7.6154e-11	6.757e-11	8.7468e-11	6.0264e-11	3.2456e-11	8.4892e-11	8.218e-11	7.5729e-11	3.3214e-11	8.0001e-11	5.5553e-11	1.56813e-10	7.2453e-11	6.2133e-11	6.9508e-11	6.3139e-11	6.1098e-11	9.2259e-11	6.6847e-11	6.7448e-11	5.1504e-11	4.11034e-10	8.2937e-11	4.1814e-11	7.5385e-11	6.2967e-11	5.7352e-11	8.6058e-11	6.9814e-11	8.9256e-11	9.1869e-11	5.5694e-11	5.2361e-11	7.7019e-11	5.9934e-11
2024-05-29T18:07:39.415	3.85214e-09	7.98235e-10	4.99553e-10	2.66143e-10	2.04575e-10	1.14462e-10	1.609e-10	7.9756e-11	1.00925e-10	1.08932e-10	1.21625e-10	6.6987e-11	9.191e-11	7.5895e-11	6.15e-11	1.09185e-10	9.3116e-11	2.7897e-11	9.4625e-11	6.9314e-11	1.01319e-10	4.6741e-11	4.3938e-11	6.2416e-11	8.3749e-11	4.29118e-10	9.5082e-11	1.06229e-10	7.1648e-11	9.2663e-11	8.0825e-11	5.3266e-11	9.7855e-11	6.2444e-11	6.8133e-11	4.8634e-11	3.709e-11	5.2891e-11	1.8846e-11	5.6956e-11	6.0454e-11	0	5.123e-11	3.64907e-10	4.3797e-11	4.8232e-11	3.9581e-11	6.2886e-11	3.9956e-11
2024-05-29T18:07:42.873	3.47154e-09	1.12175e-09	5.75436e-10	2.22019e-10	2.02065e-10	1.50156e-10	1.07412e-10	4.59607e-10	8.2918e-11	1.04194e-10	6.5287e-11	1.20244e-10	6.499e-11	7.4227e-11	3.5507e-11	9.2866e-11	8.5997e-11	8.9675e-11	7.6116e-11	6.9314e-11	5.4512e-11	4.9576e-11	7.7893e-11	8.6679e-11	8.5407e-11	1.34205e-10	1.19541e-10	7.1052e-11	8.513e-11	6.0662e-11	4.6664e-11	7.5329e-11	8.1871e-11	4.7693e-11	4.4603e-11	6.3677e-11	3.2121e-11	9.895e-11	9.4231e-11	5.6956e-11	5.058e-11	6.9382e-11	2.69695e-10	0	1.9586e-11	4.8232e-11	4.4253e-11	2.8123e-11	6.3176e-11
2024-05-29T18:07:46.332	3.65468e-09	8.66443e-10	4.88546e-10	2.88546e-10	1.52109e-10	1.23428e-10	9.4893e-11	1.16263e-10	8.444e-11	8.8469e-11	6.7179e-11	8.0508e-11	9.4574e-11	6.129e-11	6.737e-11	4.71106e-10	9.8441e-11	9.111e-11	6.072e-11	8.3305e-11	2.8468e-11	5.4809e-11	6.4318e-11	8.1722e-11	4.64183e-10	1.49342e-10	1.20754e-10	1.03396e-10	1.17857e-10	5.2535e-11	7.688e-11	7.1021e-11	7.7875e-11	5.0986e-11	5.7583e-11	5.8129e-11	4.5426e-11	4.5805e-11	4.9862e-11	3.797e-11	9.748e-11	5.0913e-11	6.7075e-11	4.3553e-11	2.7699e-11	3.9382e-11	1.9791e-11	5.6247e-11	6.9206e-11
2024-05-29T18:07:49.791	3.5766e-09	8.17253e-10	4.28592e-10	3.07989e-10	1.49855e-10	1.52172e-10	9.4893e-11	1.47423e-10	1.10558e-10	9.1278e-11	1.11966e-10	6.5099e-11	1.08062e-10	6.3301e-11	4.72658e-10	7.4701e-11	1.22662e-10	6.0264e-11	6.285e-11	6.1129e-11	9.9977e-11	5.2258e-11	6.8472e-11	4.19695e-10	7.3011e-11	1.09587e-10	1.27794e-10	7.1052e-11	7.9632e-11	7.6332e-11	4.6664e-11	6.1506e-11	1.01064e-10	4.4155e-11	5.1504e-11	5.1992e-11	4.1468e-11	4.5805e-11	5.9597e-11	6.2967e-11	6.0454e-11	6.666e-11	2.7383e-11	7.5435e-11	9.3933e-11	3.4105e-11	7.1356e-11	5.6247e-11	4.8936e-11
2024-05-29T18:07:53.249	4.0181e-09	1.12828e-09	4.45188e-10	2.6692e-10	1.41685e-10	1.31785e-10	1.25532e-10	1.04244e-10	1.46254e-10	9.9229e-11	5.0073e-11	9.7329e-11	9.191e-11	4.86221e-10	9.7886e-11	8.2756e-11	1.27755e-10	9.2523e-11	4.59e-11	8.0037e-11	5.6936e-11	7.9253e-11	4.4561e-10	6.8779e-11	8.7034e-11	1.01458e-10	9.9577e-11	8.2645e-11	1.0852e-10	8.2137e-11	6.8309e-11	8.1365e-11	4.7268e-11	3.6052e-11	4.0717e-11	5.8129e-11	5.5636e-11	3.2389e-11	4.9862e-11	7.3529e-11	8.1108e-11	3.8486e-11	6.1231e-11	5.509e-11	5.1821e-11	6.2268e-11	5.5976e-11	6.5955e-11	8.9344e-11
2024-05-29T18:07:56.714	4.37276e-09	1.19218e-09	4.45867e-10	3.38121e-10	4.95642e-10	1.14462e-10	1.03408e-10	9.4929e-11	1.55536e-10	1.11226e-10	8.3787e-11	1.11644e-10	6.1047e-11	5.7059e-11	7.2768e-11	6.3705e-11	7.8233e-11	3.2212e-11	6.072e-11	8.1687e-11	1.01319e-10	7.2033e-11	7.9644e-11	6.8779e-11	4.7375e-11	1.51244e-10	1.2893e-10	7.3112e-11	7.7713e-11	4.9531e-11	4.35971e-10	3.9702e-11	1.10132e-10	5.0986e-11	3.1539e-11	3.6764e-11	8.0837e-11	7.2423e-11	7.7705e-11	5.6956e-11	4.2748e-11	3.333e-11	6.422e-11	4.3553e-11	7.3286e-11	4.8232e-11	4.8477e-11	4.4467e-11	1.49502e-10
2024-05-29T18:08:00.166	3.59537e-09	7.85584e-10	5.73332e-10	3.38121e-10	1.9434e-10	1.68333e-10	9.6365e-11	1.20737e-10	7.9788e-11	8.2564e-11	8.527e-11	8.7909e-11	7.0492e-11	7.4227e-11	7.448e-11	5.9591e-11	9.1737e-11	6.0264e-11	1.0517e-10	1.00711e-10	8.3808e-11	5.9583e-11	9.6834e-11	8.9832e-11	1.04602e-10	1.19569e-10	1.26648e-10	4.8741e-11	8.3338e-11	7.4296e-11	4.9886e-11	1.00439e-10	5.0532e-11	4.7693e-11	4.8177e-11	4.5026e-11	5.5636e-11	5.2891e-11	3.49545e-10	5.6956e-11	8.9668e-11	2.7214e-11	5.8089e-11	5.8432e-11	5.8759e-11	4.8232e-11	5.5976e-11	3.33948e-10	6.9206e-11
2024-05-29T18:08:03.625	3.14383e-09	1.32133e-09	3.76825e-10	3.40562e-10	1.7884e-10	1.32936e-10	1.59141e-10	1.28185e-10	1.02179e-10	7.106e-11	5.20369e-10	1.12755e-10	8.4883e-11	7.9126e-11	7.448e-11	1.09185e-10	8.4502e-11	8.5226e-11	5.3822e-11	9.9377e-11	8.3808e-11	5.9583e-11	5.5079e-11	7.8243e-11	8.5407e-11	1.33141e-10	1.11983e-10	1.04822e-10	9.0294e-11	4.9531e-11	7.688e-11	5.3266e-11	6.4416e-11	6.2444e-11	6.5654e-11	3.1839e-11	3.82769e-10	6.4778e-11	7.0516e-11	4.2452e-11	4.6828e-11	5.0913e-11	4.3297e-11	5.1532e-11	3.9173e-11	3.41055e-10	7.405e-11	1.12494e-10	7.7374e-11
2024-05-29T18:08:07.084	4.09281e-09	1.25176e-09	3.14796e-10	3.03245e-10	2.04575e-10	1.32936e-10	1.17425e-10	9.9028e-11	1.2153e-10	4.82473e-10	8.074e-11	1.44708e-10	1.33749e-10	5.9212e-11	6.5472e-11	6.757e-11	1.3456e-10	6.2378e-11	7.2574e-11	8.0037e-11	1.27312e-10	3.6952e-11	7.0457e-11	6.0146e-11	6.4871e-11	1.27665e-10	9.9577e-11	7.5115e-11	6.9508e-11	5.808e-11	3.9439e-11	8.3279e-11	1.02631e-10	7.6479e-11	2.5752e-11	4.05238e-10	2.6227e-11	3.7399e-11	7.7705e-11	6.5767e-11	0	3.8486e-11	5.123e-11	5.1532e-11	3.49277e-10	1.9691e-11	5.2361e-11	4.4467e-11	6.3176e-11
2024-05-29T18:08:10.542	4.53006e-09	1.00692e-09	5.2434e-10	2.96337e-10	2.09505e-10	2.1019e-10	1.1253e-10	1.16263e-10	4.85856e-10	8.8469e-11	8.8162e-11	1.16024e-10	7.722e-11	9.8828e-11	8.2511e-11	9.5558e-11	1.00999e-10	8.369e-11	6.285e-11	9.0963e-11	9.4418e-11	6.1833e-11	4.6971e-11	7.8243e-11	1.03252e-10	1.3098e-10	1.18315e-10	8.787e-11	5.2131e-11	7.4296e-11	4.3203e-11	6.8765e-11	4.7268e-11	4.4155e-11	3.78472e-10	6.3677e-11	6.939e-11	7.2423e-11	3.7692e-11	3.797e-11	1.9117e-11	5.4428e-11	5.123e-11	3.4127e-10	5.1821e-11	7.6262e-11	4.8477e-11	6.8888e-11	3.4603e-11
2024-05-29T18:08:14.000	3.32291e-09	1.36802e-09	2.6475e-10	3.73067e-10	2.01221e-10	1.10397e-10	1.40349e-10	1.4921e-10	1.20477e-10	5.9453e-11	9.7609e-11	7.5721e-11	8.7761e-11	5.2486e-11	6.15e-11	9.4221e-11	4.70214e-10	4.8318e-11	1.22519e-10	4.0018e-11	8.8511e-11	7.3904e-11	5.7528e-11	1.04175e-10	8.2057e-11	4.46747e-10	9.9577e-11	7.7067e-11	5.4951e-11	5.5377e-11	5.5775e-11	1.7755e-11	6.1889e-11	5.4078e-11	8.3445e-11	5.5146e-11	2.6227e-11	4.1814e-11	8.2149e-11	5.6956e-11	1.08144e-10	4.3029e-11	5.4767e-11	7.0226e-11	3.9173e-11	3.4105e-11	6.2584e-11	5.2614e-11	7.2032e-11
2024-05-29T18:08:17.462	4.32476e-09	8.34239e-10	4.45867e-10	2.20146e-10	1.75963e-10	1.62812e-10	1.19797e-10	1.29209e-10	1.33511e-10	7.6203e-11	9.7609e-11	1.20244e-10	1.00929e-10	5.7059e-11	9.1219e-11	4.1101e-10	1.03493e-10	1.05615e-10	6.885e-11	8.4892e-11	7.8825e-11	5.7246e-11	4.0678e-11	6.8779e-11	4.53173e-10	1.57722e-10	1.52743e-10	5.1698e-11	8.1506e-11	6.0662e-11	7.688e-11	5.0219e-11	6.4416e-11	5.9786e-11	5.7583e-11	6.6277e-11	7.8681e-11	7.7101e-11	4.6164e-11	1.8985e-11	6.0454e-11	5.0913e-11	5.123e-11	3.3736e-11	8.7593e-11	5.2097e-11	4.4253e-11	2.8123e-11	1.18191e-10
2024-05-29T18:08:20.920	4.7859e-09	1.02467e-09	4.50585e-10	2.36475e-10	1.04346e-10	1.24656e-10	1.1253e-10	8.6146e-11	7.9788e-11	8.102e-11	8.074e-11	9.07e-11	9.7166e-11	8.9521e-11	4.87365e-10	9.6876e-11	1.6049e-10	8.0531e-11	5.8511e-11	8.3305e-11	7.5319e-11	5.4809e-11	7.9644e-11	4.80297e-10	1.01885e-10	1.33141e-10	1.13278e-10	5.9696e-11	7.9632e-11	1.7512e-11	4.3203e-11	6.1506e-11	1.7866e-11	4.4155e-11	6.3079e-11	5.8129e-11	5.2454e-11	3.2389e-11	7.0516e-11	3.797e-11	6.0454e-11	7.4528e-11	5.8089e-11	8.9256e-11	5.8759e-11	3.4105e-11	4.8477e-11	7.4408e-11	2.8253e-11
2024-05-29T18:08:24.376	3.99457e-09	1.07865e-09	4.71553e-10	2.79801e-10	1.54329e-10	1.42878e-10	1.13773e-10	1.76096e-10	1.18345e-10	9.265e-11	1.21625e-10	8.9315e-11	4.69445e-10	9.3623e-11	1.19886e-10	1.04436e-10	7.8233e-11	5.0932e-11	6.4912e-11	7.1213e-11	7.5319e-11	4.5287e-10	2.3486e-11	7.2713e-11	9.9093e-11	1.10884e-10	1.27794e-10	9.8994e-11	5.2131e-11	3.9157e-11	3.29967e-10	5.0219e-11	8.1871e-11	9.0131e-11	3.6418e-11	4.5026e-11	5.2454e-11	5.9134e-11	9.2327e-11	4.6504e-11	6.6225e-11	3.333e-11	6.7075e-11	6.7471e-11	8.0757e-11	6.8211e-11	3.4278e-11	2.8123e-11	5.2857e-11
2024-05-29T18:08:27.834	4.4248e-09	9.25339e-10	5.40791e-10	3.89366e-10	1.99523e-10	1.37438e-10	1.45275e-10	1.12792e-10	1.11703e-10	1.12355e-10	8.8162e-11	1.01098e-10	8.0373e-11	6.898e-11	8.6974e-11	7.638e-11	1.02254e-10	7.7242e-11	5.8511e-11	7.3063e-11	4.62552e-10	4.0479e-11	9.096e-11	7.6444e-11	9.3259e-11	1.3098e-10	8.7077e-11	8.4422e-11	9.5178e-11	8.2137e-11	6.3593e-11	7.7393e-11	5.6496e-11	7.2105e-11	6.3079e-11	3.6764e-11	9.2726e-11	5.6099e-11	4.6164e-11	4.6504e-11	5.4072e-11	3.333e-11	6.1231e-11	2.7545e-11	5.5399e-11	6.8211e-11	1.9791e-11	5.6247e-11	7.7374e-11
2024-05-29T18:08:31.293	3.69293e-09	8.24576e-10	4.72833e-10	3.39954e-10	1.9434e-10	1.99785e-10	8.045e-11	7.2807e-11	1.37273e-10	1.04194e-10	5.02683e-10	9.9858e-11	1.20043e-10	8.9521e-11	7.7792e-11	1.03214e-10	1.39217e-10	6.0264e-11	6.691e-11	1.10806e-10	9.5838e-11	8.8992e-11	5.2516e-11	8.6679e-11	9.1742e-11	1.27665e-10	7.2453e-11	5.7154e-11	6.7301e-11	7.2203e-11	7.8877e-11	7.5329e-11	5.0532e-11	6.4994e-11	4.8177e-11	8.0125e-11	3.95148e-10	3.2389e-11	5.3305e-11	6.5767e-11	7.4041e-11	5.0913e-11	6.1231e-11	5.1532e-11	4.3797e-11	3.48366e-10	4.4253e-11	9.7423e-11	5.2857e-11
2024-05-29T18:08:34.752	4.91499e-09	1.21987e-09	5.35175e-10	2.69238e-10	2.23645e-10	1.83073e-10	1.13773e-10	9.2094e-11	1.32554e-10	9.265e-11	6.7179e-11	7.5721e-11	6.305e-11	6.3301e-11	8.0969e-11	6.9421e-11	1.07125e-10	4.8318e-11	4.42047e-10	8.798e-11	1.11475e-10	4.3722e-11	5.7528e-11	9.7268e-11	4.4316e-11	1.82905e-10	1.05271e-10	4.54302e-10	7.7713e-11	6.0662e-11	5.2912e-11	5.6147e-11	5.3597e-11	5.9786e-11	3.1539e-11	8.6219e-11	1.8545e-11	6.7423e-11	4.2141e-11	5.6956e-11	5.7352e-11	6.3822e-11	5.4767e-11	5.1532e-11	4.7977e-11	5.5694e-11	4.4253e-11	3.4444e-11	5.9934e-11
2024-05-29T18:08:38.210	3.40694e-09	1.11758e-09	5.55127e-10	3.02561e-10	1.80732e-10	1.7629e-10	1.5004e-10	1.25049e-10	4.55841e-10	8.5567e-11	1.08555e-10	1.31152e-10	9.5879e-11	6.129e-11	1.02909e-10	7.9632e-11	8.4502e-11	4.8157e-10	6.691e-11	8.3305e-11	8.052e-11	5.9583e-11	5.7528e-11	9.8688e-11	9.3259e-11	1.45462e-10	1.15823e-10	1.04822e-10	6.2654e-11	5.2535e-11	5.5775e-11	6.6434e-11	6.1889e-11	3.1222e-11	2.37419e-10	4.1103e-11	6.1508e-11	7.9336e-11	4.9862e-11	6.8452e-11	5.4072e-11	6.3822e-11	5.4767e-11	9.7386e-11	5.8759e-11	5.5694e-11	7.405e-11	6.5955e-11	5.6506e-11
2024-05-29T18:08:41.672	3.83462e-09	1.24962e-09	3.94836e-10	2.4423e-10	1.83534e-10	6.9821e-11	9.4893e-11	1.56153e-10	1.02179e-10	8.8469e-11	9.6316e-11	7.8944e-11	1.11457e-10	8.0693e-11	7.6154e-11	1.06837e-10	4.69128e-10	6.4424e-11	5.6216e-11	7.1213e-11	9.0024e-11	4.0479e-11	7.2388e-11	8.6679e-11	8.8631e-11	1.37374e-10	1.19541e-10	6.4479e-11	6.9508e-11	3.0331e-11	6.3593e-11	8.5151e-11	5.3597e-11	6.2444e-11	7.0524e-11	5.1992e-11	3.2121e-11	4.5805e-11	4.6164e-11	6.8452e-11	6.0454e-11	6.9382e-11	4.7429e-11	5.1532e-11	5.5399e-11	4.403e-11	7.6648e-11	3.9773e-11	8.9344e-11
2024-05-29T18:08:45.126	3.51969e-09	1.03311e-09	4.42466e-10	2.21085e-10	1.70063e-10	8.9005e-11	1.13773e-10	9.6314e-11	1.04641e-10	6.926e-11	8.074e-11	5.6928e-11	5.2278e-11	7.9126e-11	6.737e-11	4.76992e-10	9.7138e-11	1.28849e-10	5.6216e-11	9.0963e-11	1.05242e-10	8.4264e-11	4.3938e-11	7.2713e-11	4.2933e-10	1.8981e-10	1.20754e-10	5.7154e-11	7.1648e-11	4.2895e-11	8.0825e-11	5.3266e-11	1.11571e-10	5.9786e-11	7.0524e-11	4.1103e-11	3.709e-11	6.202e-11	6.5285e-11	5.6956e-11	7.647e-11	4.7136e-11	8.4401e-11	4.3553e-11	4.3797e-11	5.5694e-11	6.5638e-11	6.5955e-11	5.6506e-11
2024-05-29T18:08:48.584	4.29822e-09	1.07865e-09	6.08607e-10	3.02561e-10	1.46398e-10	1.30624e-10	1.15003e-10	1.38141e-10	1.40934e-10	9.6652e-11	6.902e-11	9.8602e-11	1.23106e-10	6.129e-11	4.38624e-10	5.7423e-11	1.48952e-10	9.9285e-11	7.6116e-11	8.9484e-11	9.2976e-11	4.9576e-11	7.2388e-11	4.31142e-10	1.04602e-10	1.57722e-10	8.7077e-11	7.7067e-11	7.3725e-11	6.3139e-11	7.2721e-11	6.1506e-11	5.9254e-11	6.7448e-11	4.0717e-11	5.5146e-11	9.8132e-11	8.3628e-11	5.3305e-11	7.5941e-11	9.1684e-11	6.3822e-11	6.422e-11	4.7709e-11	4.7977e-11	2.7847e-11	7.405e-11	4.4467e-11	4.8936e-11
2024-05-29T18:08:52.048	4.41871e-09	7.92357e-10	3.41496e-10	2.70006e-10	1.20958e-10	1.31785e-10	1.54657e-10	1.00357e-10	1.30619e-10	9.6652e-11	6.5287e-11	7.4056e-11	9.4574e-11	7.252e-11	4.58303e-10	9.5558e-11	8.7468e-11	5.3418e-11	5.6216e-11	6.9314e-11	8.3808e-11	7.5729e-11	7.4268e-11	7.0773e-11	9.3259e-11	1.06946e-10	1.21956e-10	3.4465e-11	8.6885e-11	5.5377e-11	4.6664e-11	5.3266e-11	1.7866e-11	5.9786e-11	5.1504e-11	9.191e-11	6.4243e-11	7.2423e-11	4.9862e-11	3.797e-11	3.17602e-10	5.7729e-11	6.422e-11	4.7709e-11	6.7849e-11	3.9382e-11	5.2361e-11	3.4444e-11	6.626e-11
2024-05-29T18:08:55.506	4.59938e-09	8.66443e-10	5.28358e-10	2.82012e-10	5.82115e-10	1.06177e-10	1.24406e-10	1.12792e-10	1.47122e-10	9.7949e-11	6.902e-11	1.21276e-10	1.03361e-10	7.0772e-11	7.7792e-11	7.2984e-11	1.30714e-10	9.797e-11	7.9501e-11	7.4867e-11	8.052e-11	7.0112e-11	8.4679e-11	9.1368e-11	6.4871e-11	1.3944e-10	1.17076e-10	7.1052e-11	9.0294e-11	9.0994e-11	4.233e-10	6.1506e-11	6.4416e-11	4.0308e-11	6.5654e-11	4.5026e-11	3.2121e-11	6.7423e-11	9.0383e-11	6.0037e-11	7.4041e-11	3.333e-11	5.8089e-11	7.0226e-11	4.7977e-11	6.2268e-11	5.2361e-11	5.6247e-11	5.2857e-11
2024-05-29T18:08:58.960	4.38506e-09	6.85714e-10	4.21484e-10	2.71536e-10	9.2229e-11	1.22187e-10	8.7165e-11	1.41927e-10	1.1396e-10	7.7842e-11	6.1326e-11	5.6928e-11	7.2232e-11	5.9212e-11	5.2666e-11	9.2866e-11	9.4476e-11	6.8332e-11	7.6116e-11	8.1687e-11	1.06518e-10	8.0958e-11	4.6971e-11	6.0146e-11	9.3259e-11	1.2654e-10	1.15823e-10	5.9696e-11	2.4575e-11	7.4296e-11	5.2912e-11	6.8765e-11	8.5681e-11	7.8574e-11	5.1504e-11	5.1992e-11	5.5636e-11	6.4778e-11	3.81141e-10	6.2967e-11	6.8929e-11	2.7214e-11	6.422e-11	4.3553e-11	5.1821e-11	4.403e-11	4.8477e-11	3.52947e-10	5.6506e-11
2024-05-29T18:09:02.418	3.90077e-09	8.6258e-10	4.03165e-10	2.90692e-10	1.3173e-10	1.29452e-10	1.29937e-10	1.56153e-10	1.03417e-10	1.00494e-10	8.9572e-11	4.38408e-10	1.04556e-10	7.4227e-11	6.5472e-11	9.8176e-11	7.9847e-11	5.3418e-11	6.691e-11	7.6629e-11	9.7237e-11	7.0112e-11	7.2388e-11	7.2713e-11	1.19617e-10	1.17153e-10	8.7077e-11	7.5115e-11	6.0196e-11	5.5377e-11	6.1098e-11	4.3491e-11	6.1889e-11	5.9786e-11	5.1504e-11	4.1103e-11	6.1508e-11	3.64045e-10	4.9862e-11	9.3008e-11	6.6225e-11	6.3822e-11	2.7383e-11	6.1593e-11	5.1821e-11	4.403e-11	1.25167e-10	4.4467e-11	6.626e-11
2024-05-29T18:09:05.877	3.36719e-09	1.26556e-09	4.91013e-10	2.40814e-10	1.83534e-10	1.5317e-10	1.609e-10	1.34249e-10	1.17264e-10	1.07767e-10	4.62189e-10	7.061e-11	6.6874e-11	8.6678e-11	5.7254e-11	1.21291e-10	7.6586e-11	6.2378e-11	7.4366e-11	8.1687e-11	6.3656e-11	4.3722e-11	4.3938e-11	8.6679e-11	1.00499e-10	1.12166e-10	1.26648e-10	7.7067e-11	6.2654e-11	6.5523e-11	4.3203e-11	7.1021e-11	1.01064e-10	6.2444e-11	4.8177e-11	7.7988e-11	3.81419e-10	5.9134e-11	3.7692e-11	3.797e-11	4.6828e-11	3.333e-11	4.3297e-11	8.9256e-11	1.9586e-11	3.60938e-10	6.2584e-11	5.9659e-11	9.1551e-11
2024-05-29T18:09:09.335	4.83767e-09	8.46952e-10	5.74385e-10	2.63798e-10	1.4288e-10	1.70133e-10	1.29937e-10	1.33258e-10	4.74991e-10	2.7521e-11	1.50218e-10	8.3547e-11	8.1904e-11	4.476e-11	1.16688e-10	1.14846e-10	9.8441e-11	4.54695e-10	5.8511e-11	1.16672e-10	1.01319e-10	8.2627e-11	4.0678e-11	8.1722e-11	7.8563e-11	1.46441e-10	9.6603e-11	6.4479e-11	8.1506e-11	3.5023e-11	4.3203e-11	8.1365e-11	8.3798e-11	4.0308e-11	6.8133e-11	7.5791e-11	0	3.7399e-11	4.9862e-11	4.6504e-11	6.8929e-11	6.0852e-11	7.245e-11	3.3736e-11	5.1821e-11	5.9072e-11	5.5976e-11	7.4408e-11	1.9978e-11
2024-05-29T18:09:12.799	3.72417e-09	9.00463e-10	5.10915e-10	3.05287e-10	2.1669e-10	8.5513e-11	1.33136e-10	4.47925e-10	1.2153e-10	7.2814e-11	1.15276e-10	9.7329e-11	7.5594e-11	5.482e-11	8.6974e-11	5.7423e-11	9.8441e-11	8.0531e-11	8.5871e-11	1.12004e-10	5.6936e-11	5.4809e-11	1.0371e-10	8.827e-11	8.2057e-11	1.2426e-10	1.0103e-10	7.1052e-11	5.2131e-11	6.0662e-11	7.8877e-11	5.3266e-11	9.9472e-11	7.2105e-11	6.0393e-11	5.8129e-11	6.4243e-11	2.6445e-11	5.9597e-11	6.2967e-11	6.0454e-11	5.7729e-11	3.37049e-10	7.0226e-11	7.3286e-11	3.4105e-11	6.2584e-11	8.6682e-11	6.9206e-11
2024-05-29T18:09:16.253	3.62331e-09	6.60915e-10	5.38552e-10	2.59843e-10	1.6291e-10	1.11769e-10	4.88494e-10	1.16263e-10	9.3048e-11	1.01742e-10	6.7179e-11	7.8944e-11	7.0492e-11	1.15209e-10	8.6974e-11	1.01978e-10	8.1428e-11	4.5555e-11	6.285e-11	9.0963e-11	1.17377e-10	6.4002e-11	8.9431e-11	6.8779e-11	8.5407e-11	1.23104e-10	1.02463e-10	8.2645e-11	9.0294e-11	7.4296e-11	5.8497e-11	7.7393e-11	6.6847e-11	4.4155e-11	4.0717e-11	3.6764e-11	6.1508e-11	4.1814e-11	6.2506e-11	7.1036e-11	6.0454e-11	3.57426e-10	1.9363e-11	7.5435e-11	7.3286e-11	5.5694e-11	3.4278e-11	3.9773e-11	4.4672e-11
2024-05-29T18:09:19.715	4.94503e-09	9.77293e-10	5.60003e-10	3.33806e-10	1.83534e-10	1.59981e-10	1.26648e-10	1.39097e-10	1.50544e-10	9.4003e-11	7.5939e-11	1.05915e-10	8.6334e-11	6.3301e-11	4.54158e-10	6.5666e-11	1.10639e-10	6.0264e-11	6.4912e-11	6.9314e-11	1.07778e-10	4.3722e-11	7.9644e-11	4.40401e-10	6.4871e-11	1.32066e-10	1.0103e-10	9.4387e-11	8.3338e-11	3.9157e-11	4.9886e-11	8.1365e-11	7.3662e-11	5.9786e-11	4.0717e-11	5.8129e-11	6.1508e-11	4.1814e-11	3.2643e-11	6.5767e-11	5.7352e-11	4.7136e-11	4.3297e-11	6.7471e-11	2.7699e-11	3.9382e-11	4.4253e-11	6.2886e-11	3.4603e-11
2024-05-29T18:09:23.170	4.30291e-09	8.18886e-10	3.33439e-10	2.34716e-10	1.81671e-10	1.17094e-10	1.07412e-10	1.0921e-10	1.38197e-10	5.729e-11	4.4786e-11	1.29238e-10	8.6334e-11	9.6261e-11	5.00365e-10	8.2756e-11	1.04718e-10	5.0932e-11	6.4912e-11	9.3851e-11	1.24089e-10	5.7246e-11	8.1357e-11	7.4601e-11	9.1742e-11	1.04238e-10	1.26648e-10	6.2133e-11	7.7713e-11	4.9531e-11	9.4981e-11	6.6434e-11	8.1871e-11	5.0986e-11	7.5079e-11	6.0966e-11	7.1825e-11	3.2389e-11	3.7692e-11	4.6504e-11	3.59183e-10	6.0852e-11	6.7075e-11	6.7471e-11	9.1869e-11	8.3541e-11	7.6648e-11	7.1701e-11	4.4672e-11
2024-05-29T18:09:26.631	4.34185e-09	9.52372e-10	4.89164e-10	3.23694e-10	1.89014e-10	1.64673e-10	1.70247e-10	1.17398e-10	1.35405e-10	7.9447e-11	6.7179e-11	1.01098e-10	9.0548e-11	3.3044e-10	7.9396e-11	1.43337e-10	9.8441e-11	3.9452e-11	7.9501e-11	9.8024e-11	8.218e-11	4.3722e-11	4.41881e-10	5.2751e-11	1.23085e-10	1.09587e-10	1.03877e-10	6.8931e-11	5.4951e-11	6.7822e-11	6.3593e-11	4.25015e-10	3.5731e-11	4.7693e-11	3.6418e-11	4.5026e-11	6.4243e-11	4.1814e-11	7.299e-11	5.6956e-11	2.7036e-11	3.8486e-11	5.123e-11	5.509e-11	7.3286e-11	4.403e-11	4.4253e-11	6.2886e-11	8.2371e-11
2024-05-29T18:09:30.085	3.38712e-09	1.06431e-09	6.74087e-10	2.73815e-10	1.36798e-10	1.66513e-10	1.18617e-10	8.6146e-11	1.20477e-10	5.5043e-11	5.4852e-11	8.7909e-11	4.93179e-10	5.0044e-11	8.0969e-11	7.8023e-11	9.3116e-11	7.2029e-11	5.8511e-11	5.1663e-11	7.8825e-11	4.57072e-10	6.6428e-11	8.1722e-11	8.3749e-11	1.2878e-10	1.11983e-10	7.3112e-11	6.2654e-11	7.4296e-11	5.5775e-11	1.0353e-10	6.6847e-11	7.6479e-11	5.7583e-11	6.6277e-11	7.4181e-11	2.6445e-11	5.9597e-11	2.6849e-11	3.8235e-11	3.333e-11	1.9363e-11	6.4599e-11	5.8759e-11	4.8232e-11	4.8477e-11	9.113e-11	3.9956e-11
2024-05-29T18:09:33.550	4.08787e-09	1.05991e-09	5.28929e-10	2.12486e-10	1.93462e-10	1.59026e-10	1.11272e-10	1.38141e-10	9.3048e-11	7.2814e-11	6.902e-11	1.13855e-10	8.7761e-11	8.5221e-11	4.4913e-11	6.9421e-11	8.1428e-11	7.0205e-11	6.072e-11	6.1129e-11	9.1512e-11	5.4809e-11	4.6971e-11	5.5326e-11	8.8631e-11	1.2878e-10	1.46904e-10	4.8741e-11	6.0196e-11	5.5377e-11	7.2721e-11	5.3266e-11	8.5681e-11	7.2105e-11	4.4603e-11	4.8634e-11	5.8645e-11	3.7399e-11	3.87609e-10	7.8278e-11	3.3112e-11	5.4428e-11	3.8726e-11	5.1532e-11	6.7849e-11	3.4105e-11	4.4253e-11	2.99617e-10	3.9956e-11
2024-05-29T18:09:37.007	3.91627e-09	1.23457e-09	7.5365e-10	3.2564e-10	2.05405e-10	1.00273e-10	9.4893e-11	1.04244e-10	7.653e-11	8.2564e-11	7.0813e-11	8.6479e-11	9.4574e-11	1.02559e-10	6.5472e-11	6.1682e-11	1.00999e-10	7.8904e-11	5.6216e-11	4.51575e-10	8.5404e-11	5.9583e-11	5.5079e-11	8.0001e-11	8.8631e-11	1.62191e-10	9.1964e-11	8.2645e-11	4.32337e-10	3.5023e-11	8.9934e-11	5.6147e-11	8.1871e-11	2.5493e-11	6.8133e-11	5.1992e-11	3.709e-11	5.2891e-11	4.2141e-11	5.023e-11	5.058e-11	5.4428e-11	3.3538e-11	7.0226e-11	3.9173e-11	5.5694e-11	5.9372e-11	6.2886e-11	5.2857e-11
2024-05-29T18:09:40.462	4.01139e-09	1.07989e-09	4.97736e-10	3.1856e-10	1.38036e-10	1.89613e-10	9.9242e-11	1.12792e-10	1.25646e-10	7.7842e-11	5.0441e-10	7.8944e-11	6.499e-11	7.7527e-11	7.2768e-11	6.9421e-11	7.9847e-11	9.5285e-11	7.2574e-11	8.3305e-11	8.052e-11	3.3051e-11	6.8472e-11	6.2416e-11	6.4871e-11	1.15926e-10	1.2893e-10	6.4479e-11	4.915e-11	7.2203e-11	7.2721e-11	5.6147e-11	3.9949e-11	9.1916e-11	4.8177e-11	7.1193e-11	3.84562e-10	3.2389e-11	5.3305e-11	8.2755e-11	5.4072e-11	8.3879e-11	5.123e-11	5.1532e-11	3.3925e-11	3.58784e-10	5.2361e-11	8.437e-11	4.4672e-11
2024-05-29T18:09:43.919	3.88347e-09	1.25921e-09	4.85444e-10	2.01479e-10	1.81671e-10	1.23428e-10	9.9242e-11	1.3226e-10	5.9708e-11	4.84561e-10	9.7609e-11	5.6928e-11	8.3407e-11	8.6678e-11	5.5007e-11	1.13737e-10	1.07125e-10	8.0531e-11	8.5871e-11	9.6653e-11	9.1512e-11	4.3722e-11	5.2516e-11	5.0044e-11	5.5553e-11	1.17153e-10	1.48876e-10	7.5115e-11	8.1506e-11	4.2895e-11	6.3593e-11	3.0753e-11	9.1098e-11	6.2444e-11	6.8133e-11	4.17154e-10	4.9066e-11	8.5693e-11	6.2506e-11	7.3529e-11	3.3112e-11	5.0913e-11	4.3297e-11	5.8432e-11	3.25984e-10	4.403e-11	7.6648e-11	3.9773e-11	4.8936e-11
2024-05-29T18:09:47.379	4.70073e-09	9.27502e-10	5.71749e-10	2.99119e-10	1.48716e-10	1.37438e-10	1.57363e-10	1.59512e-10	2.36151e-10	9.7949e-11	8.9572e-11	5.6928e-11	1.00929e-10	9.8828e-11	1.02909e-10	5.517e-11	9.1737e-11	7.0205e-11	7.6116e-11	9.0963e-11	6.9732e-11	4.6741e-11	8.3035e-11	9.8688e-11	6.6999e-11	1.45462e-10	7.8258e-11	7.5115e-11	1.01325e-10	8.579e-11	5.5775e-11	5.6147e-11	6.4416e-11	6.7448e-11	4.06764e-10	3.6764e-11	6.1508e-11	5.6099e-11	5.3305e-11	4.2452e-11	5.7352e-11	3.333e-11	3.3538e-11	3.4733e-10	5.8759e-11	7.0996e-11	4.8477e-11	3.9773e-11	7.2032e-11
2024-05-29T18:09:50.840	4.6907e-09	9.68368e-10	4.49914e-10	2.64582e-10	1.67035e-10	8.9005e-11	1.32081e-10	9.4929e-11	1.3159e-10	9.265e-11	6.7179e-11	1.05915e-10	9.8436e-11	1.01331e-10	4.4913e-11	5.12619e-10	7.6586e-11	8.0531e-11	9.7368e-11	1.09595e-10	8.052e-11	7.2033e-11	3.3214e-11	7.4601e-11	4.46626e-10	1.19569e-10	9.1964e-11	7.897e-11	9.83e-11	4.9531e-11	7.2721e-11	6.6434e-11	8.5681e-11	6.9814e-11	5.4628e-11	6.0966e-11	3.2121e-11	1.87e-11	5.6539e-11	5.023e-11	6.3405e-11	4.7136e-11	4.3297e-11	4.7709e-11	8.0757e-11	5.5694e-11	4.4253e-11	7.4408e-11	7.2032e-11
2024-05-29T18:09:54.295	3.83813e-09	8.9451e-10	4.82322e-10	2.89263e-10	2.28163e-10	1.07602e-10	9.7814e-11	1.0921e-10	8.8848e-11	9.265e-11	6.902e-11	1.18153e-10	5.6832e-11	6.7141e-11	4.10718e-10	1.15945e-10	9.8441e-11	7.7242e-11	8.7391e-11	1.00711e-10	6.7768e-11	4.6741e-11	8.9431e-11	4.6319e-10	6.0392e-11	1.29885e-10	1.02463e-10	7.7067e-11	6.2654e-11	3.0331e-11	3.9439e-11	6.6434e-11	8.5681e-11	6.2444e-11	4.8177e-11	5.1992e-11	5.5636e-11	4.9475e-11	8.2149e-11	5.6956e-11	5.7352e-11	2.7214e-11	5.8089e-11	6.1593e-11	5.5399e-11	4.403e-11	7.405e-11	7.1701e-11	4.8936e-11
2024-05-29T18:09:57.754	4.06143e-09	8.35039e-10	4.61843e-10	2.90692e-10	1.56519e-10	1.34076e-10	9.6365e-11	9.6314e-11	1.60372e-10	1.02975e-10	6.1326e-11	9.7329e-11	1.1583e-10	2.60516e-10	6.3517e-11	1.12616e-10	1.39217e-10	4.2613e-11	4.59e-11	1.12004e-10	7.8825e-11	8.0958e-11	4.23069e-10	6.2416e-11	1.27562e-10	9.4149e-11	1.21956e-10	9.4387e-11	7.9632e-11	5.5377e-11	4.6664e-11	4.39241e-10	3.0944e-11	8.455e-11	6.5654e-11	4.1103e-11	6.1508e-11	6.4778e-11	4.6164e-11	7.8278e-11	3.3112e-11	3.8486e-11	5.4767e-11	4.7709e-11	6.1938e-11	7.8763e-11	2.7988e-11	6.8888e-11	8.2371e-11
2024-05-29T18:10:01.212	3.56341e-09	1.03375e-09	4.06152e-10	2.0454e-10	5.35884e-10	1.13123e-10	1.07412e-10	1.39097e-10	8.2918e-11	6.1539e-11	7.7572e-11	7.8944e-11	6.499e-11	7.5895e-11	9.659e-11	8.8674e-11	1.52338e-10	6.2378e-11	7.0736e-11	9.8024e-11	5.1975e-11	1.54139e-10	6.8472e-11	7.4601e-11	6.6999e-11	1.08274e-10	9.0364e-11	7.5115e-11	8.1506e-11	7.6332e-11	3.95174e-10	5.3266e-11	6.1889e-11	4.0308e-11	5.4628e-11	6.3677e-11	7.4181e-11	3.7399e-11	8.6364e-11	6.2967e-11	6.6225e-11	3.8486e-11	5.4767e-11	5.1532e-11	5.5399e-11	5.9072e-11	4.8477e-11	8.8934e-11	7.7374e-11
2024-05-29T18:10:04.670	3.97599e-09	1.04276e-09	5.36303e-10	5.15284e-10	2.19033e-10	1.46042e-10	1.43325e-10	1.10417e-10	1.07047e-10	1.26108e-10	1.26675e-10	1.07086e-10	8.9166e-11	9.8828e-11	8.8412e-11	1.22332e-10	7.1417e-11	8.369e-11	7.4366e-11	8.1687e-11	4.89783e-10	4.3722e-11	6.8472e-11	7.4601e-11	9.7667e-11	1.37374e-10	1.17076e-10	6.4479e-11	7.7713e-11	3.96632e-10	4.9886e-11	5.8887e-11	6.1889e-11	8.455e-11	4.8177e-11	8.2207e-11	4.5426e-11	7.4799e-11	4.9862e-11	5.023e-11	6.0454e-11	6.0852e-11	3.3538e-11	5.8432e-11	6.1938e-11	4.403e-11	4.4253e-11	5.2614e-11	5.6506e-11
2024-05-29T18:10:08.128	3.70373e-09	1.10375e-09	6.00109e-10	3.07316e-10	1.70063e-10	1.06177e-10	1.0065e-10	9.6314e-11	1.10558e-10	4.2039e-11	5.57809e-10	9.07e-11	8.4883e-11	6.129e-11	6.9216e-11	8.8674e-11	1.07125e-10	2.7897e-11	6.072e-11	1.12004e-10	7.1643e-11	4.6741e-11	6.4318e-11	8.1722e-11	9.4751e-11	1.63945e-10	9.8101e-11	7.1052e-11	6.0196e-11	6.5523e-11	4.9886e-11	9.0534e-11	7.5798e-11	5.4078e-11	7.5079e-11	5.5146e-11	3.76427e-10	4.1814e-11	6.2506e-11	0	5.058e-11	3.8486e-11	4.7429e-11	5.509e-11	4.3797e-11	3.40486e-10	1.9791e-11	6.5955e-11	3.4603e-11
2024-05-29T18:10:11.588	5.20117e-09	1.06369e-09	4.1571e-10	3.44793e-10	1.67035e-10	7.999e-11	1.18617e-10	1.40047e-10	9.9655e-11	5.41407e-10	7.5939e-11	1.57889e-10	1.08062e-10	7.7527e-11	6.737e-11	9.8176e-11	7.8233e-11	6.6407e-11	6.072e-11	6.7361e-11	9.0024e-11	5.2258e-11	9.096e-11	7.6444e-11	7.6757e-11	1.67397e-10	1.17076e-10	7.3112e-11	5.7633e-11	3.5023e-11	6.8309e-11	6.6434e-11	2.5266e-11	4.7693e-11	8.5409e-11	3.80733e-10	1.8545e-11	9.161e-11	8.2149e-11	7.5941e-11	5.058e-11	4.3029e-11	6.422e-11	7.2877e-11	1.84778e-10	3.4105e-11	5.2361e-11	3.9773e-11	4.8936e-11
2024-05-29T18:10:15.046	4.20958e-09	1.04978e-09	4.25763e-10	2.66143e-10	1.74018e-10	1.47081e-10	1.15003e-10	9.6314e-11	1.19416e-10	5.729e-11	1.45985e-10	1.09389e-10	8.3407e-11	9.4951e-11	5.7254e-11	8.7232e-11	9.7138e-11	6.0264e-11	8.2747e-11	9.8024e-11	7.1643e-11	7.3904e-11	5.7528e-11	6.0146e-11	7.1063e-11	1.3944e-10	1.17076e-10	5.9696e-11	4.2565e-11	6.7822e-11	7.2721e-11	4.6976e-11	6.6847e-11	5.0986e-11	3.1539e-11	4.11444e-10	6.1508e-11	9.535e-11	6.7951e-11	4.2452e-11	8.3331e-11	7.4528e-11	3.8726e-11	6.4599e-11	3.42063e-10	7.0996e-11	3.4278e-11	5.6247e-11	6.9206e-11
2024-05-29T18:10:18.504	4.38199e-09	1.04532e-09	5.44133e-10	3.22422e-10	2.04575e-10	1.03267e-10	1.609e-10	9.6314e-11	5.12387e-10	7.9447e-11	1.01389e-10	8.3547e-11	6.8707e-11	9.4951e-11	6.15e-11	7.1225e-11	8.8913e-11	6.8332e-11	5.1318e-11	5.6594e-11	9.2976e-11	9.0514e-11	8.1357e-11	5.0044e-11	1.37103e-10	1.34205e-10	1.08006e-10	8.787e-11	7.1648e-11	9.4303e-11	4.6664e-11	8.3279e-11	6.4416e-11	4.4155e-11	3.9936e-10	4.1103e-11	9.2726e-11	4.1814e-11	5.9597e-11	4.6504e-11	8.3331e-11	7.6973e-11	5.4767e-11	3.83658e-10	5.8759e-11	4.403e-11	6.5638e-11	5.2614e-11	5.9934e-11
2024-05-29T18:10:21.962	4.19998e-09	1.3339e-09	5.01365e-10	3.16607e-10	1.58678e-10	1.34076e-10	1.03408e-10	9.0644e-11	1.2153e-10	1.19962e-10	8.527e-11	1.2531e-10	7.722e-11	5.9212e-11	6.15e-11	7.1225e-11	1.11785e-10	6.8332e-11	7.6116e-11	6.9314e-11	1.02643e-10	9.4932e-11	6.6428e-11	8.3407e-11	9.9093e-11	4.75578e-10	1.0103e-10	7.897e-11	9.5178e-11	5.808e-11	5.8497e-11	7.7393e-11	5.0532e-11	5.0986e-11	5.4628e-11	6.3677e-11	4.9066e-11	5.2891e-11	5.3305e-11	6.5767e-11	6.6225e-11	2.7214e-11	5.123e-11	4.7709e-11	9.7932e-11	1.9691e-11	2.7988e-11	5.6247e-11	4.8936e-11
2024-05-29T18:10:25.421	3.42665e-09	7.86434e-10	3.78424e-10	2.54203e-10	1.48716e-10	5.5199e-11	1.59141e-10	1.37179e-10	1.3159e-10	1.07767e-10	8.074e-11	1.22299e-10	8.1904e-11	6.3301e-11	8.6974e-11	8.8674e-11	4.75875e-10	8.369e-11	4.8684e-11	6.535e-11	7.5319e-11	5.7246e-11	4.6971e-11	6.2416e-11	5.2967e-11	1.2654e-10	1.35535e-10	5.1698e-11	3.4754e-11	8.0249e-11	6.1098e-11	7.7393e-11	3.0944e-11	7.2105e-11	3.6418e-11	7.5791e-11	4.1468e-11	6.9968e-11	7.0516e-11	4.2452e-11	4.2748e-11	5.7729e-11	4.7429e-11	8.9256e-11	6.7849e-11	4.8232e-11	2.7988e-11	2.8123e-11	7.7374e-11
2024-05-29T18:10:28.879	3.30258e-09	1.18206e-09	3.57066e-10	2.22019e-10	1.70063e-10	1.36328e-10	1.1253e-10	1.36209e-10	1.46254e-10	8.9884e-11	8.9572e-11	7.061e-11	6.499e-11	7.252e-11	8.4025e-11	4.69218e-10	9.9728e-11	1.05615e-10	5.3822e-11	8.6449e-11	7.5319e-11	6.1833e-11	7.7893e-11	1.02831e-10	4.13689e-10	7.749e-11	7.8258e-11	5.7154e-11	7.3725e-11	8.579e-11	7.2721e-11	7.9404e-11	6.4416e-11	1.08157e-10	4.0717e-11	7.3528e-11	5.8645e-11	4.5805e-11	4.2141e-11	4.6504e-11	7.4041e-11	2.7214e-11	5.4767e-11	3.8955e-11	5.8759e-11	2.7847e-11	3.9581e-11	5.6247e-11	7.7374e-11
2024-05-29T18:10:32.338	3.26568e-09	8.02408e-10	5.28358e-10	1.9415e-10	1.44064e-10	1.79714e-10	1.2327e-10	5.6396e-11	9.9655e-11	1.02975e-10	1.16358e-10	1.13855e-10	8.4883e-11	1.00087e-10	4.77699e-10	9.2866e-11	1.05928e-10	7.0205e-11	7.7827e-11	8.0037e-11	5.6936e-11	3.6952e-11	5.7528e-11	4.42607e-10	7.4907e-11	1.2878e-10	1.02463e-10	5.7154e-11	4.5975e-11	3.9157e-11	5.8497e-11	6.4017e-11	6.1889e-11	6.7448e-11	4.4603e-11	5.1992e-11	6.6866e-11	8.151e-11	7.7705e-11	5.3698e-11	7.4041e-11	7.6973e-11	5.8089e-11	8.2635e-11	5.1821e-11	3.4105e-11	4.8477e-11	7.4408e-11	4.8936e-11
2024-05-29T18:10:35.796	3.52734e-09	9.57269e-10	4.87308e-10	1.90923e-10	4.57443e-10	1.30624e-10	1.0065e-10	8.1401e-11	7.9788e-11	7.106e-11	1.1308e-10	6.3156e-11	1.12566e-10	5.7059e-11	5.7254e-11	1.12616e-10	9.5816e-11	5.3418e-11	7.2574e-11	4.9012e-11	6.3656e-11	6.1833e-11	4.0678e-11	9.5827e-11	8.7034e-11	1.60419e-10	7.0411e-11	4.8741e-11	8.1506e-11	7.6332e-11	4.10237e-10	7.3207e-11	1.01064e-10	1.8026e-11	4.8177e-11	3.1839e-11	9.9869e-11	4.5805e-11	4.2141e-11	4.6504e-11	6.8929e-11	4.7136e-11	5.8089e-11	6.7471e-11	5.1821e-11	6.8211e-11	3.4278e-11	4.8711e-11	6.626e-11
2024-05-29T18:10:39.254	3.7314e-09	9.54474e-10	5.77009e-10	5.22469e-10	2.23645e-10	1.24656e-10	1.31014e-10	7.4605e-11	1.00925e-10	6.1539e-11	7.9172e-11	9.2064e-11	1.20043e-10	1.00087e-10	4.7638e-11	1.21291e-10	1.30714e-10	7.2029e-11	8.8885e-11	1.03327e-10	9.2976e-11	6.1833e-11	4.3938e-11	7.4601e-11	7.3011e-11	9.1061e-11	8.19e-11	7.1052e-11	8.3338e-11	4.19185e-10	3.5275e-11	7.3207e-11	8.9329e-11	7.2105e-11	6.3079e-11	6.3677e-11	4.9066e-11	6.4778e-11	6.5285e-11	6.0037e-11	5.058e-11	4.3029e-11	4.3297e-11	2.7545e-11	5.8759e-11	6.8211e-11	4.4253e-11	3.32167e-10	6.626e-11
2024-05-29T18:10:42.713	3.62887e-09	9.86137e-10	3.77626e-10	3.28174e-10	1.18111e-10	1.34076e-10	1.3833e-10	1.28185e-10	1.15072e-10	4.4942e-11	1.00145e-10	9.3408e-11	1.26099e-10	8.3739e-11	7.6154e-11	9.0093e-11	1.16258e-10	7.2029e-11	5.8511e-11	4.0018e-11	9.0024e-11	7.9253e-11	9.096e-11	9.1368e-11	9.7667e-11	1.13433e-10	9.6603e-11	6.8931e-11	6.9508e-11	4.9531e-11	7.2721e-11	8.1365e-11	5.9254e-11	5.0986e-11	7.2837e-11	7.1193e-11	4.9066e-11	4.00629e-10	3.2643e-11	7.1036e-11	6.0454e-11	5.4428e-11	4.7429e-11	6.7471e-11	6.7849e-11	4.8232e-11	3.51249e-10	1.9886e-11	8.2371e-11
2024-05-29T18:10:46.176	4.24621e-09	8.45373e-10	4.76651e-10	2.4592e-10	1.36798e-10	1.67426e-10	1.342e-10	1.12792e-10	1.25646e-10	9.1278e-11	4.84436e-10	6.6987e-11	8.1904e-11	6.898e-11	1.04127e-10	6.5666e-11	9.8441e-11	3.9452e-11	8.2747e-11	8.6449e-11	9.5838e-11	4.9576e-11	6.6428e-11	8.5059e-11	6.0392e-11	1.29885e-10	1.0103e-10	6.8931e-11	1.05701e-10	8.9293e-11	5.5775e-11	6.4017e-11	1.04174e-10	6.2444e-11	5.4628e-11	5.1992e-11	3.92528e-10	5.2891e-11	4.9862e-11	7.3529e-11	5.4072e-11	6.0852e-11	6.7075e-11	1.9477e-11	8.3098e-11	3.16894e-10	5.2361e-11	6.2886e-11	5.9934e-11
2024-05-29T18:10:49.631	4.1807e-09	1.30556e-09	6.16989e-10	2.96337e-10	1.76927e-10	1.35207e-10	1.26648e-10	8.7671e-11	8.5935e-11	4.65969e-10	1.00145e-10	1.05915e-10	6.6874e-11	7.5895e-11	7.1014e-11	7.9632e-11	6.7752e-11	6.4424e-11	2.295e-11	1.03327e-10	6.7768e-11	4.0479e-11	9.3943e-11	8.1722e-11	9.622e-11	1.57722e-10	9.8101e-11	7.5115e-11	1.31194e-10	3.0331e-11	5.5775e-11	5.3266e-11	8.7524e-11	7.4324e-11	5.7583e-11	4.31487e-10	5.2454e-11	5.9134e-11	7.5385e-11	5.023e-11	4.2748e-11	3.8486e-11	6.422e-11	6.4599e-11	3.54726e-10	4.8232e-11	7.405e-11	9.3275e-11	4.8936e-11
2024-05-29T18:10:53.093	4.17909e-09	9.50968e-10	5.99605e-10	2.19203e-10	1.69059e-10	1.47081e-10	1.2885e-10	1.30241e-10	1.12838e-10	1.11226e-10	5.4852e-11	7.2354e-11	1.04556e-10	3.8764e-11	5.2666e-11	1.04436e-10	4.52245e-10	4.8318e-11	9.7368e-11	4.6209e-11	8.6971e-11	8.4264e-11	2.8764e-11	6.0146e-11	5.8023e-11	9.5655e-11	9.1964e-11	7.7067e-11	7.3725e-11	5.5377e-11	9.1647e-11	7.9404e-11	7.5798e-11	7.2105e-11	7.5079e-11	5.5146e-11	5.5636e-11	5.2891e-11	4.2141e-11	4.2452e-11	5.4072e-11	4.7136e-11	5.123e-11	5.509e-11	4.7977e-11	3.4105e-11	5.9372e-11	6.8888e-11	4.8936e-11
2024-05-29T18:10:56.548	4.10923e-09	1.05486e-09	5.15038e-10	2.78316e-10	1.7884e-10	1.18388e-10	6.4969e-11	1.26104e-10	1.20477e-10	9.5337e-11	7.427e-11	9.4733e-11	1.02152e-10	7.5895e-11	7.2768e-11	4.69759e-10	1.00999e-10	1.43154e-10	5.8511e-11	8.9484e-11	6.5744e-11	3.3051e-11	4.0678e-11	5.0044e-11	4.42207e-10	1.02857e-10	1.06647e-10	8.2645e-11	6.7301e-11	5.5377e-11	4.6664e-11	5.0219e-11	8.5681e-11	6.4994e-11	4.8177e-11	6.6277e-11	3.2121e-11	5.2891e-11	4.9862e-11	5.6956e-11	3.3112e-11	5.0913e-11	6.7075e-11	5.509e-11	3.3925e-11	4.403e-11	6.2584e-11	2.8123e-11	1.9978e-11
2024-05-29T18:11:00.007	4.08128e-09	9.38953e-10	4.59219e-10	2.61432e-10	2.06231e-10	9.4e-11	1.27754e-10	1.36209e-10	1.28655e-10	1.31028e-10	6.5287e-11	7.7349e-11	1.30932e-10	5.482e-11	5.01368e-10	8.7232e-11	1.24722e-10	6.2378e-11	5.1318e-11	1.03327e-10	6.7768e-11	4.6741e-11	5.2516e-11	4.04846e-10	7.3011e-11	9.5655e-11	9.8101e-11	1.00483e-10	6.7301e-11	9.5916e-11	6.3593e-11	5.8887e-11	6.9193e-11	8.831e-11	3.1539e-11	7.1193e-11	7.8681e-11	7.2423e-11	3.2643e-11	4.2452e-11	7.1531e-11	3.8486e-11	1.9363e-11	7.2877e-11	4.3797e-11	3.9382e-11	6.2584e-11	3.9773e-11	1.9978e-11
2024-05-29T18:11:03.464	4.81954e-09	1.11578e-09	5.11506e-10	1.73892e-10	1.16662e-10	3.69047e-10	1.57363e-10	1.19634e-10	1.17264e-10	1.01742e-10	6.1326e-11	1.18153e-10	9.191e-11	7.4227e-11	8.0969e-11	9.2866e-11	9.5816e-11	7.2029e-11	4.59e-11	6.535e-11	9.4418e-11	5.9583e-11	4.28252e-10	8.3407e-11	9.7667e-11	1.09587e-10	9.8101e-11	7.7067e-11	6.9508e-11	4.2895e-11	2.4943e-11	4.29442e-10	6.6847e-11	4.7693e-11	5.4628e-11	3.1839e-11	5.2454e-11	2.6445e-11	6.5285e-11	7.5941e-11	6.3405e-11	4.3029e-11	4.7429e-11	4.7709e-11	3.9173e-11	7.0996e-11	1.9791e-11	4.4467e-11	9.1551e-11
2024-05-29T18:11:06.922	3.88521e-09	1.05169e-09	5.82222e-10	2.07556e-10	2.24404e-10	1.99021e-10	1.26648e-10	1.80555e-10	7.9788e-11	8.9884e-11	9.8885e-11	1.19203e-10	4.56294e-10	7.4227e-11	1.28023e-10	6.9421e-11	1.36442e-10	7.8904e-11	4.8684e-11	1.03327e-10	9.9977e-11	7.2033e-11	8.7876e-11	9.8688e-11	6.4871e-11	1.47415e-10	1.08006e-10	9.5947e-11	7.7713e-11	6.0662e-11	6.5993e-11	7.9404e-11	6.1889e-11	6.2444e-11	7.7255e-11	8.6219e-11	7.1825e-11	5.6099e-11	3.94422e-10	6.2967e-11	3.8235e-11	7.9342e-11	5.4767e-11	7.5435e-11	6.4961e-11	3.4105e-11	5.9372e-11	3.07433e-10	3.9956e-11
2024-05-29T18:11:10.385	4.04649e-09	8.48528e-10	5.12097e-10	1.36529e-10	1.64985e-10	1.68333e-10	9.6365e-11	7.9756e-11	8.7404e-11	6.5514e-11	6.902e-11	6.6987e-11	1.02152e-10	5.7059e-11	7.1014e-11	7.2984e-11	1.0948e-10	9.3914e-11	6.072e-11	1.05879e-10	1.05242e-10	7.0112e-11	7.0457e-11	9.8688e-11	6.4871e-11	7.9313e-11	1.17076e-10	4.5593e-11	4.19217e-10	9.2663e-11	5.8497e-11	6.4017e-11	7.7875e-11	4.7693e-11	5.4628e-11	7.3528e-11	9.2726e-11	2.40929e-10	6.7951e-11	5.023e-11	2.7036e-11	5.0913e-11	5.4767e-11	7.2877e-11	8.5375e-11	4.403e-11	3.22776e-10	2.8123e-11	4.8936e-11
2024-05-29T18:11:13.845	3.70194e-09	8.13978e-10	6.58213e-10	2.99119e-10	1.16662e-10	7.4057e-11	1.17425e-10	9.3522e-11	1.24631e-10	1.24098e-10	7.427e-11	7.8944e-11	1.09205e-10	6.5249e-11	9.3943e-11	8.1209e-11	5.9752e-11	8.0531e-11	4.59e-11	4.58031e-10	1.01319e-10	7.3904e-11	3.7134e-11	6.0146e-11	6.6999e-11	1.37374e-10	1.03877e-10	5.7154e-11	2.45749e-10	3.5023e-11	5.2912e-11	4.6976e-11	4.3762e-11	5.7004e-11	6.8133e-11	5.1992e-11	6.6866e-11	5.2891e-11	6.5285e-11	6.5767e-11	4.2748e-11	3.333e-11	1.9363e-11	8.0307e-11	3.3925e-11	4.8232e-11	1.9791e-11	5.9659e-11	7.2032e-11
2024-05-29T18:11:17.298	3.88694e-09	9.09321e-10	4.89781e-10	3.13981e-10	1.48716e-10	1.67426e-10	1.35244e-10	1.50095e-10	1.03417e-10	4.61614e-10	5.9247e-11	1.07086e-10	1.12566e-10	8.6678e-11	4.2013e-11	5.7423e-11	1.28749e-10	6.0264e-11	4.64984e-10	9.6653e-11	1.38493e-10	2.3371e-11	5.2516e-11	7.0773e-11	4.4316e-11	1.20759e-10	7.0411e-11	5.7154e-11	6.5019e-11	7.6332e-11	8.4586e-11	6.4017e-11	7.7875e-11	5.7004e-11	2.5752e-11	6.3677e-11	6.1508e-11	5.2891e-11	9.4231e-11	3.2883e-11	7.8823e-11	4.3029e-11	5.123e-11	8.49e-11	6.7849e-11	4.403e-11	3.9581e-11	5.9659e-11	3.9956e-11
2024-05-29T18:11:20.757	4.3743e-09	9.15178e-10	4.68984e-10	3.31939e-10	2.00374e-10	1.17094e-10	9.188e-11	1.42857e-10	7.653e-11	9.6652e-11	8.9572e-11	4.1773e-11	4.7287e-11	9.4951e-11	5.7254e-11	9.8176e-11	8.7468e-11	7.0205e-11	6.285e-11	8.3305e-11	1.18522e-10	6.6102e-11	7.4268e-11	8.3407e-11	6.9061e-11	4.56872e-10	1.10673e-10	1.00483e-10	7.1648e-11	5.808e-11	8.0825e-11	9.5615e-11	7.7875e-11	5.9786e-11	6.0393e-11	6.3677e-11	2.6227e-11	5.6099e-11	6.5285e-11	6.0037e-11	6.0454e-11	4.7136e-11	4.3297e-11	7.7909e-11	3.9173e-11	0	2.7988e-11	6.8888e-11	5.2857e-11
2024-05-29T18:11:24.219	3.67843e-09	1.08051e-09	6.51292e-10	2.90692e-10	1.54329e-10	1.29452e-10	8.218e-11	4.79642e-10	9.837e-11	1.12355e-10	1.25671e-10	1.02324e-10	7.2232e-11	4.7476e-11	7.6154e-11	9.2866e-11	9.7138e-11	8.369e-11	2.295e-11	8.6449e-11	5.6936e-11	9.6359e-11	4.9821e-11	1.06813e-10	8.0329e-11	1.43483e-10	1.33375e-10	9.2801e-11	4.2565e-11	6.7822e-11	6.1098e-11	7.7393e-11	5.3597e-11	3.6052e-11	5.1504e-11	6.6277e-11	5.5636e-11	4.5805e-11	4.2141e-11	8.9049e-11	6.3405e-11	4.7136e-11	2.96196e-10	4.3553e-11	7.3286e-11	6.2268e-11	6.5638e-11	7.1701e-11	3.9956e-11
2024-05-29T18:11:27.673	3.38911e-09	1.18092e-09	4.23629e-10	2.4423e-10	1.85379e-10	1.22187e-10	1.15003e-10	1.64421e-10	7.3127e-11	1.28105e-10	5.4852e-11	8.2042e-11	9.191e-11	6.5249e-11	7.2768e-11	5.7423e-11	1.19503e-10	4.8318e-11	7.0736e-11	8.4892e-11	8.8511e-11	5.2258e-11	7.2388e-11	3.31116e-10	8.7034e-11	1.52186e-10	9.6603e-11	6.8931e-11	6.2654e-11	7.2203e-11	6.8309e-11	9.5615e-11	3.91011e-10	7.4324e-11	4.0717e-11	5.5146e-11	7.1825e-11	5.9134e-11	5.6539e-11	5.6956e-11	5.058e-11	6.666e-11	7.245e-11	4.3553e-11	3.3925e-11	4.403e-11	4.8477e-11	5.9659e-11	5.9934e-11
2024-05-29T18:11:31.132	4.2652e-09	1.07865e-09	4.12792e-10	2.40814e-10	1.83534e-10	1.4394e-10	1.2327e-10	8.917e-11	1.04641e-10	7.106e-11	1.22651e-10	3.8675e-11	1.31878e-10	1.04973e-10	4.3603e-10	1.13737e-10	1.20566e-10	7.3808e-11	5.6216e-11	7.6629e-11	6.5744e-11	5.2258e-11	4.0678e-11	3.90501e-10	1.20784e-10	1.32066e-10	9.6603e-11	7.3112e-11	7.1648e-11	9.9061e-11	6.3593e-11	8.1365e-11	3.5731e-11	9.1916e-11	6.8133e-11	4.1103e-11	5.8645e-11	3.2389e-11	4.9862e-11	8.9049e-11	6.0454e-11	6.0852e-11	8.4401e-11	6.7471e-11	1.9586e-11	2.7847e-11	5.2361e-11	8.1993e-11	6.626e-11
2024-05-29T18:11:34.592	4.01643e-09	1.09707e-09	5.81703e-10	3.11333e-10	4.9116e-10	1.46042e-10	1.3833e-10	8.1401e-11	1.00925e-10	1.08932e-10	8.9572e-11	7.2354e-11	5.6832e-11	9.3623e-11	8.6974e-11	8.8674e-11	1.02254e-10	9.9285e-11	8.8885e-11	6.9314e-11	6.7768e-11	4.26473e-10	8.1357e-11	6.8779e-11	1.07251e-10	1.29885e-10	1.0103e-10	5.1698e-11	4.2565e-11	6.7822e-11	4.25499e-10	6.4017e-11	9.4537e-11	4.4155e-11	6.3079e-11	4.1103e-11	6.939e-11	6.202e-11	5.3305e-11	6.5767e-11	3.8235e-11	2.7214e-11	3.8726e-11	5.8432e-11	3.3925e-11	2.7847e-11	5.9372e-11	1.08922e-10	3.9956e-11
2024-05-29T18:11:38.049	4.21757e-09	9.91541e-10	5.44688e-10	5.31897e-10	1.34288e-10	1.11769e-10	1.15003e-10	1.10417e-10	1.10558e-10	6.3558e-11	7.7572e-11	1.14945e-10	8.3407e-11	1.01331e-10	7.448e-11	7.1225e-11	1.07125e-10	6.8332e-11	9.3223e-11	6.9314e-11	4.27653e-10	5.2258e-11	1.24275e-10	8.0001e-11	1.14831e-10	1.20759e-10	1.05271e-10	3.8533e-11	3.0098e-11	4.33216e-10	3.0549e-11	1.15067e-10	6.9193e-11	5.7004e-11	4.0717e-11	7.3528e-11	1.03255e-10	5.2891e-11	8.4283e-11	5.3698e-11	6.0454e-11	6.0852e-11	5.123e-11	7.5435e-11	2.7699e-11	4.8232e-11	5.5976e-11	8.1993e-11	5.2857e-11
2024-05-29T18:11:41.511	4.19356e-09	8.34239e-10	7.9615e-10	3.02561e-10	1.81671e-10	1.32936e-10	1.72709e-10	1.3226e-10	1.57973e-10	8.102e-11	1.00145e-10	7.061e-11	1.1583e-10	8.6678e-11	6.737e-11	1.25399e-10	8.5997e-11	9.6637e-11	4.2935e-11	4.58322e-10	6.3656e-11	8.0958e-11	7.0457e-11	1.19129e-10	1.44087e-10	1.49342e-10	9.6603e-11	9.5947e-11	4.06416e-10	3.0331e-11	8.9934e-11	3.551e-11	5.9254e-11	4.7693e-11	8.9207e-11	7.1193e-11	4.1468e-11	7.9336e-11	3.7692e-11	6.0037e-11	6.3405e-11	2.7214e-11	0	6.1593e-11	3.9173e-11	0	3.47888e-10	7.7019e-11	4.8936e-11
2024-05-29T18:11:44.970	3.76731e-09	1.04915e-09	3.97885e-10	2.94233e-10	1.55428e-10	1.09008e-10	1.32081e-10	9.3522e-11	1.3159e-10	8.2564e-11	1.08555e-10	9.07e-11	6.8707e-11	5.9212e-11	7.1014e-11	1.23364e-10	9.7138e-11	5.0932e-11	8.5871e-11	8.3305e-11	1.19656e-10	5.7246e-11	7.0457e-11	6.4606e-11	7.3011e-11	1.38411e-10	1.0103e-10	2.71913e-10	6.9508e-11	7.2203e-11	4.9886e-11	5.0219e-11	7.1463e-11	6.9814e-11	6.3079e-11	2.5996e-11	3.75512e-10	4.9475e-11	5.9597e-11	7.3529e-11	5.4072e-11	5.0913e-11	6.7075e-11	0	6.1938e-11	3.43885e-10	7.6648e-11	6.2886e-11	0
2024-05-29T18:11:48.424	3.45405e-09	8.09865e-10	4.74109e-10	2.91403e-10	1.39263e-10	1.56125e-10	1.2885e-10	1.43782e-10	9.4407e-11	3.56008e-10	1.09703e-10	9.9858e-11	7.8812e-11	7.0772e-11	3.8896e-11	1.29386e-10	6.7752e-11	8.0531e-11	4.39657e-10	9.8024e-11	1.1268e-10	6.1833e-11	8.9431e-11	6.8779e-11	9.7667e-11	1.32066e-10	1.11983e-10	6.8931e-11	8.8606e-11	6.0662e-11	1.7637e-11	7.9404e-11	6.1889e-11	6.9814e-11	5.1504e-11	6.8779e-11	4.9066e-11	0	5.6539e-11	6.2967e-11	2.7036e-11	6.0852e-11	7.245e-11	3.3736e-11	8.3098e-11	5.5694e-11	6.2584e-11	3.4444e-11	3.4603e-11
2024-05-29T18:11:51.882	4.2841e-09	1.09524e-09	3.90186e-10	2.63012e-10	1.49855e-10	1.47081e-10	1.07412e-10	4.64483e-10	9.5746e-11	1.1458e-10	6.1326e-11	9.7329e-11	9.0548e-11	8.6678e-11	5.7254e-11	1.45967e-10	1.11785e-10	8.6734e-11	7.2574e-11	1.00711e-10	4.6488e-11	7.5729e-11	5.7528e-11	1.10652e-10	7.6757e-11	1.10884e-10	7.4438e-11	6.6741e-11	4.5975e-11	4.2895e-11	6.5993e-11	6.4017e-11	7.1463e-11	8.645e-11	3.1539e-11	7.5791e-11	7.4181e-11	8.151e-11	4.6164e-11	7.5941e-11	6.6225e-11	4.3029e-11	3.81407e-10	9.1357e-11	5.5399e-11	6.2268e-11	7.1356e-11	8.1993e-11	4.8936e-11
2024-05-29T18:11:55.342	3.47929e-09	6.66951e-10	5.57841e-10	2.32054e-10	1.52109e-10	1.6093e-10	9.9242e-11	1.06756e-10	9.9655e-11	7.9447e-11	5.2517e-11	9.4733e-11	1.1583e-10	7.252e-11	8.9827e-11	1.03214e-10	1.0948e-10	6.4424e-11	8.7391e-11	6.535e-11	9.0024e-11	6.4002e-11	4.3938e-11	5.7786e-11	9.4751e-11	1.59525e-10	9.3536e-11	6.8931e-11	7.9632e-11	3.5023e-11	4.6664e-11	6.1506e-11	4.20889e-10	4.7693e-11	4.4603e-11	4.8634e-11	6.6866e-11	6.9968e-11	4.6164e-11	3.797e-11	4.6828e-11	7.6973e-11	6.9814e-11	5.509e-11	7.3286e-11	1.9691e-11	2.7988e-11	4.4467e-11	4.8936e-11
2024-05-29T18:11:58.803	3.56152e-09	1.09585e-09	5.12686e-10	3.11333e-10	1.74993e-10	5.67499e-10	1.18617e-10	1.26104e-10	1.22573e-10	5.9453e-11	1.09703e-10	5.9077e-11	9.0548e-11	4.476e-11	3.8896e-11	7.4701e-11	7.8233e-11	4.5555e-11	6.691e-11	7.3063e-11	1.03951e-10	4.0479e-11	7.0457e-11	5.5326e-11	6.6999e-11	1.3944e-10	9.6603e-11	3.8533e-11	4.5975e-11	5.5377e-11	5.8497e-11	4.20541e-10	5.6496e-11	6.7448e-11	2.5752e-11	7.5791e-11	7.1825e-11	3.7399e-11	6.7951e-11	6.5767e-11	8.1108e-11	4.7136e-11	5.123e-11	3.3736e-11	6.4961e-11	5.5694e-11	4.8477e-11	5.2614e-11	3.4603e-11
2024-05-29T18:12:02.265	3.79047e-09	7.93199e-10	4.57241e-10	2.34716e-10	4.85236e-10	9.5607e-11	1.1622e-10	1.05507e-10	1.07047e-10	1.04194e-10	1.1743e-10	7.7349e-11	7.8812e-11	8.3739e-11	9.3943e-11	1.12616e-10	9.3116e-11	1.08043e-10	5.8511e-11	5.8905e-11	7.3504e-11	1.7014e-10	6.2137e-11	1.20291e-10	6.6999e-11	1.56813e-10	9.5082e-11	5.9696e-11	6.9508e-11	6.7822e-11	4.13259e-10	5.0219e-11	7.9898e-11	4.4155e-11	4.0717e-11	4.8634e-11	5.8645e-11	4.5805e-11	4.6164e-11	8.2755e-11	5.7352e-11	6.0852e-11	4.3297e-11	2.7545e-11	7.8346e-11	5.9072e-11	6.5638e-11	6.2886e-11	7.4751e-11
2024-05-29T18:12:05.719	3.64917e-09	8.55583e-10	4.02415e-10	5.41162e-10	1.82605e-10	1.50156e-10	1.609e-10	6.7125e-11	1.40028e-10	8.4079e-11	6.1326e-11	1.26311e-10	1.04556e-10	7.7527e-11	5.0215e-11	6.5666e-11	1.19503e-10	8.8217e-11	7.4366e-11	6.535e-11	6.3656e-11	8.4264e-11	5.5079e-11	6.4606e-11	8.3749e-11	1.18367e-10	1.10673e-10	6.6741e-11	8.8606e-11	4.12549e-10	4.6664e-11	8.1365e-11	8.7524e-11	6.9814e-11	5.1504e-11	7.3528e-11	4.1468e-11	5.9134e-11	3.7692e-11	5.023e-11	7.1531e-11	6.0852e-11	1.9363e-11	4.3553e-11	3.3925e-11	0	5.2361e-11	3.38652e-10	2.8253e-11
2024-05-29T18:12:09.177	4.37584e-09	1.04532e-09	3.57911e-10	1.96272e-10	1.46398e-10	1.65596e-10	8.7165e-11	1.54447e-10	1.17264e-10	5.5043e-11	1.09703e-10	5.03942e-10	8.0373e-11	5.7059e-11	6.3517e-11	7.8023e-11	1.10639e-10	5.0932e-11	5.8511e-11	8.4892e-11	9.4418e-11	5.2258e-11	7.2388e-11	4.4135e-11	9.7667e-11	1.2878e-10	1.14558e-10	5.7154e-11	1.27695e-10	5.808e-11	6.3593e-11	8.1365e-11	5.6496e-11	5.0986e-11	8.7328e-11	4.8634e-11	6.6866e-11	3.66439e-10	6.5285e-11	5.023e-11	1.9117e-11	8.1642e-11	7.245e-11	8.0307e-11	7.5857e-11	4.403e-11	3.42213e-10	4.4467e-11	2.8253e-11
2024-05-29T18:12:12.632	4.00635e-09	1.52982e-09	4.75382e-10	2.60639e-10	2.40505e-10	1.57098e-10	1.32081e-10	1.0921e-10	6.9558e-11	4.4942e-11	6.3337e-11	5.9077e-11	9.3252e-11	5.2486e-11	8.2511e-11	7.4701e-11	9.1737e-11	6.2378e-11	4.29047e-10	9.0963e-11	8.5404e-11	1.03202e-10	8.6292e-11	6.6726e-11	1.12361e-10	1.18367e-10	1.08006e-10	3.88021e-10	3.8856e-11	8.2137e-11	6.8309e-11	5.3266e-11	7.3662e-11	5.7004e-11	6.8133e-11	5.8129e-11	5.5636e-11	5.6099e-11	1.8846e-11	5.3698e-11	6.8929e-11	5.4428e-11	8.8732e-11	5.8432e-11	6.4961e-11	3.9382e-11	5.5976e-11	3.9773e-11	4.8936e-11
2024-05-29T18:12:16.099	2.93563e-09	1.12532e-09	5.79621e-10	3.92017e-10	2.11927e-10	1.6093e-10	1.45275e-10	1.26104e-10	7.8176e-11	8.102e-11	8.3787e-11	9.4733e-11	1.38315e-10	7.9126e-11	5.0215e-11	8.4274e-11	1.16258e-10	4.57822e-10	7.7827e-11	8.798e-11	6.9732e-11	6.4002e-11	5.7528e-11	7.6444e-11	9.3259e-11	1.34205e-10	4.65178e-10	5.7154e-11	1.31194e-10	3.5023e-11	8.6406e-11	6.8765e-11	5.9254e-11	5.0986e-11	5.1504e-11	6.3677e-11	6.1508e-11	4.9475e-11	5.6539e-11	5.6956e-11	5.058e-11	4.7136e-11	4.7429e-11	6.4599e-11	8.0757e-11	4.8232e-11	2.7988e-11	7.1701e-11	4.8936e-11
2024-05-29T18:12:19.548	3.17579e-09	9.6214e-10	3.88644e-10	2.47599e-10	2.19808e-10	1.03267e-10	1.82223e-10	1.3226e-10	8.7404e-11	1.34826e-10	1.00145e-10	8.9315e-11	1.08062e-10	5.7059e-11	6.9216e-11	7.2984e-11	4.30283e-10	6.6407e-11	8.8885e-11	8.9484e-11	1.2078e-10	7.0112e-11	7.6102e-11	6.4606e-11	1.19617e-10	7.3707e-11	1.17076e-10	6.6741e-11	4.2565e-11	7.2203e-11	3.5275e-11	6.8765e-11	7.1463e-11	7.4324e-11	4.0717e-11	5.8129e-11	3.2121e-11	4.9475e-11	6.5285e-11	7.1036e-11	6.0454e-11	5.7729e-11	8.215e-11	3.8955e-11	4.3797e-11	3.4105e-11	3.4278e-11	6.8888e-11	3.4603e-11
2024-05-29T18:12:23.015	3.6675e-09	1.05105e-09	5.2203e-10	2.94233e-10	1.83534e-10	1.17094e-10	1.52827e-10	1.57e-10	9.837e-11	1.18906e-10	1.1084e-10	7.5721e-11	7.3932e-11	7.252e-11	6.737e-11	4.91911e-10	9.3116e-11	1.09237e-10	9.18e-11	8.1687e-11	8.3808e-11	7.0112e-11	9.3943e-11	4.7182e-11	4.16056e-10	1.32066e-10	9.9577e-11	6.4479e-11	7.5745e-11	4.2895e-11	4.3203e-11	9.0534e-11	9.7855e-11	6.7448e-11	6.5654e-11	5.5146e-11	5.5636e-11	4.5805e-11	3.7692e-11	3.797e-11	5.4072e-11	4.7136e-11	3.3538e-11	6.7471e-11	4.3797e-11	7.3676e-11	4.8477e-11	4.8711e-11	5.9934e-11
2024-05-29T18:12:26.467	4.17586e-09	1.16086e-09	4.76651e-10	2.61432e-10	1.50986e-10	8.9005e-11	5.27527e-10	1.23985e-10	9.5746e-11	9.5337e-11	6.5287e-11	1.10522e-10	8.3407e-11	5.9212e-11	3.8896e-11	7.638e-11	6.9609e-11	5.5793e-11	5.3822e-11	8.1687e-11	6.9732e-11	4.6741e-11	8.1357e-11	5.0044e-11	6.9061e-11	1.33141e-10	8.19e-11	9.2801e-11	1.01325e-10	3.0331e-11	8.8187e-11	6.1506e-11	9.2833e-11	4.0308e-11	7.0524e-11	5.1992e-11	7.6464e-11	3.2389e-11	5.6539e-11	5.6956e-11	5.4072e-11	3.70149e-10	2.7383e-11	5.509e-11	4.3797e-11	4.403e-11	3.4278e-11	5.9659e-11	7.2032e-11
2024-05-29T18:12:29.924	3.60844e-09	9.26781e-10	5.295e-10	2.64582e-10	2.36223e-10	9.8742e-11	1.17425e-10	1.4921e-10	1.0823e-10	4.2039e-11	9.2329e-11	6.3156e-11	8.3407e-11	8.3739e-11	4.64044e-10	1.03214e-10	8.8913e-11	7.0205e-11	7.7827e-11	6.535e-11	1.02643e-10	4.3722e-11	7.7893e-11	5.7786e-11	6.6999e-11	1.56813e-10	1.0103e-10	8.787e-11	9.0294e-11	5.2535e-11	3.0549e-11	7.1021e-11	7.3662e-11	7.6479e-11	6.0393e-11	3.6764e-11	5.8645e-11	7.9336e-11	4.9862e-11	4.6504e-11	4.03282e-10	1.9243e-11	4.3297e-11	4.3553e-11	3.3925e-11	7.3676e-11	5.2361e-11	5.6247e-11	6.3176e-11
2024-05-29T18:12:33.383	4.63583e-09	8.87012e-10	5.55671e-10	2.63798e-10	2.11123e-10	2.39971e-10	1.37309e-10	1.17398e-10	1.00925e-10	1.31028e-10	5.4852e-11	9.2064e-11	1.08062e-10	9.2276e-11	7.2768e-11	1.24386e-10	1.32651e-10	3.9452e-11	6.691e-11	7.3063e-11	1.03951e-10	7.0112e-11	4.47463e-10	7.4601e-11	6.0392e-11	1.13433e-10	1.23146e-10	5.1698e-11	7.3725e-11	8.2137e-11	5.2912e-11	4.2834e-10	4.7268e-11	6.9814e-11	5.4628e-11	5.1992e-11	5.5636e-11	4.9475e-11	3.7692e-11	6.5767e-11	8.9668e-11	3.333e-11	5.123e-11	5.1532e-11	3.3925e-11	7.3676e-11	7.1356e-11	8.1993e-11	4.4672e-11
2024-05-29T18:12:36.841	4.58325e-09	9.91541e-10	5.48557e-10	3.06641e-10	5.14836e-10	1.29452e-10	9.3399e-11	9.7681e-11	6.5795e-11	1.10085e-10	7.7572e-11	5.2366e-11	8.4883e-11	6.129e-11	6.5472e-11	9.946e-11	6.7752e-11	4.5555e-11	4.59e-11	7.1213e-11	1.17377e-10	5.4809e-11	6.6428e-11	6.0146e-11	1.38122e-10	1.50296e-10	7.0411e-11	5.7154e-11	4.915e-11	7.4296e-11	4.24034e-10	7.7393e-11	7.9898e-11	3.1222e-11	6.3079e-11	6.8779e-11	7.1825e-11	5.2891e-11	3.7692e-11	5.3698e-11	6.3405e-11	6.0852e-11	9.6815e-11	7.0226e-11	7.062e-11	7.3676e-11	5.5976e-11	5.2614e-11	3.4603e-11
2024-05-29T18:12:40.299	4.03482e-09	7.90669e-10	4.72194e-10	3.01189e-10	1.67035e-10	9.4e-11	9.9242e-11	1.0921e-10	8.7404e-11	9.9229e-11	4.63002e-10	8.7909e-11	1.00929e-10	7.5895e-11	6.737e-11	1.08017e-10	1.05928e-10	6.8332e-11	3.6287e-11	1.0837e-10	1.09024e-10	1.05815e-10	6.8472e-11	7.6444e-11	8.7034e-11	1.42483e-10	1.2893e-10	8.9543e-11	9.1951e-11	8.2137e-11	4.6664e-11	8.5151e-11	8.1871e-11	8.831e-11	4.8177e-11	4.8634e-11	3.85455e-10	4.9475e-11	6.7951e-11	6.5767e-11	5.058e-11	3.8486e-11	6.422e-11	5.1532e-11	2.7699e-11	3.34164e-10	0	6.8888e-11	7.7374e-11
2024-05-29T18:12:43.763	4.34496e-09	9.77293e-10	5.50207e-10	2.99119e-10	2.02905e-10	7.999e-11	8.3875e-11	1.04244e-10	1.71869e-10	7.7842e-11	8.3787e-11	1.03535e-10	8.0373e-11	9.8828e-11	4.2013e-11	1.19182e-10	1.27755e-10	3.68334e-10	2.8108e-11	1.20055e-10	7.8825e-11	9.3482e-11	4.3938e-11	8.0001e-11	5.2967e-11	1.38411e-10	4.91101e-10	4.2211e-11	9.0294e-11	5.808e-11	8.6406e-11	9.2259e-11	1.21171e-10	1.8026e-11	4.8177e-11	7.5791e-11	3.709e-11	6.4778e-11	5.6539e-11	6.0037e-11	4.2748e-11	4.7136e-11	5.8089e-11	5.1532e-11	5.1821e-11	7.6262e-11	1.9791e-11	7.1701e-11	7.9912e-11
2024-05-29T18:12:47.216	4.08293e-09	1.10375e-09	4.7981e-10	2.70772e-10	1.74993e-10	1.09008e-10	1.2885e-10	8.6146e-11	4.78995e-10	8.703e-11	8.527e-11	7.8944e-11	9.5879e-11	7.5895e-11	8.2511e-11	5.0363e-11	8.8913e-11	4.50108e-10	5.8511e-11	1.0461e-10	5.4512e-11	9.0514e-11	6.4318e-11	5.2751e-11	6.0392e-11	1.18367e-10	9.3536e-11	7.1052e-11	6.5019e-11	3.5023e-11	3.9439e-11	3.551e-11	5.6496e-11	4.0308e-11	8.3445e-11	7.7988e-11	4.9066e-11	8.151e-11	7.9958e-11	6.5767e-11	4.2748e-11	4.7136e-11	5.123e-11	5.1532e-11	6.7849e-11	2.7847e-11	7.405e-11	3.4444e-11	6.626e-11
2024-05-29T18:12:50.675	4.50622e-09	9.27502e-10	4.25763e-10	2.55016e-10	1.12202e-10	9.4e-11	1.90527e-10	1.38141e-10	8.7404e-11	8.8469e-11	9.2329e-11	1.05915e-10	7.722e-11	1.10776e-10	6.15e-11	1.30362e-10	1.15156e-10	1.08043e-10	4.59e-11	1.27597e-10	5.6936e-11	5.4809e-11	6.4318e-11	6.2416e-11	4.32585e-10	1.25405e-10	1.67322e-10	4.2211e-11	7.3725e-11	2.4765e-11	6.3593e-11	5.3266e-11	5.0532e-11	5.0986e-11	4.0717e-11	3.1839e-11	2.6227e-11	4.9475e-11	1.8846e-11	3.797e-11	7.8823e-11	2.7214e-11	3.8726e-11	7.0226e-11	4.3797e-11	1.9691e-11	2.7988e-11	5.6247e-11	3.4603e-11
2024-05-29T18:12:54.133	3.90595e-09	1.3792e-09	5.24915e-10	2.86385e-10	2.15114e-10	1.19668e-10	8.5536e-11	1.47423e-10	8.1368e-11	8.8469e-11	8.3787e-11	6.115e-11	8.0373e-11	6.129e-11	4.51094e-10	8.8674e-11	1.23697e-10	4.8318e-11	6.072e-11	7.4867e-11	1.1268e-10	6.6102e-11	6.8472e-11	4.53476e-10	1.11105e-10	1.32066e-10	8.5386e-11	4.5593e-11	6.9508e-11	5.2535e-11	4.3203e-11	3.551e-11	9.1098e-11	6.4994e-11	6.3079e-11	6.0966e-11	3.709e-11	6.4778e-11	1.0149e-10	4.2452e-11	8.7607e-11	5.7729e-11	8.4401e-11	8.0307e-11	5.5399e-11	4.403e-11	3.4278e-11	3.9773e-11	5.9934e-11
2024-05-29T18:12:57.592	4.44756e-09	9.48859e-10	4.81695e-10	3.51338e-10	2.1669e-10	1.85553e-10	6.9165e-11	1.66025e-10	1.16173e-10	1.15677e-10	7.9172e-11	8.5026e-11	9.3252e-11	4.6865e-10	6.3517e-11	9.946e-11	8.4502e-11	5.0932e-11	4.2935e-11	8.4892e-11	9.4418e-11	6.6102e-11	4.3146e-10	5.5326e-11	8.2057e-11	1.46441e-10	1.13278e-10	6.6741e-11	1.2164e-10	8.9293e-11	6.3593e-11	6.4017e-11	6.1889e-11	5.0986e-11	9.806e-11	4.8634e-11	9.8132e-11	9.161e-11	0	7.5941e-11	5.4072e-11	5.7729e-11	0	4.7709e-11	6.1938e-11	6.2268e-11	4.4253e-11	2.8123e-11	4.8936e-11
2024-05-29T18:13:01.049	4.19998e-09	7.29144e-10	4.3489e-10	2.60639e-10	5.81533e-10	7.8063e-11	1.0065e-10	1.28185e-10	9.5746e-11	9.7949e-11	9.0961e-11	7.4056e-11	7.5594e-11	8.6678e-11	6.3517e-11	9.2866e-11	1.10639e-10	8.6734e-11	8.2747e-11	5.6594e-11	1.07778e-10	5.7246e-11	6.2137e-11	8.0001e-11	9.622e-11	1.34205e-10	9.8101e-11	7.1052e-11	6.9508e-11	3.5023e-11	4.14762e-10	5.3266e-11	9.2833e-11	7.4324e-11	2.5752e-11	6.3677e-11	4.9066e-11	4.9475e-11	7.0516e-11	4.6504e-11	5.058e-11	3.8486e-11	4.7429e-11	5.1532e-11	4.3797e-11	3.4105e-11	2.7988e-11	5.9659e-11	6.626e-11
2024-05-29T18:13:04.508	3.34512e-09	1.20167e-09	3.90953e-10	3.06641e-10	2.23645e-10	1.77152e-10	9.188e-11	1.01669e-10	9.027e-11	7.2814e-11	7.2562e-11	1.09389e-10	8.3407e-11	1.03773e-10	4.7638e-11	7.1225e-11	1.08309e-10	3.2212e-11	6.072e-11	5.8905e-11	1.05242e-10	5.9583e-11	7.0457e-11	7.4601e-11	7.6757e-11	1.2654e-10	1.10673e-10	5.1698e-11	3.4754e-11	2.80188e-10	6.8309e-11	3.9702e-11	2.5266e-11	6.2444e-11	7.0524e-11	4.5026e-11	7.6464e-11	6.4778e-11	3.90803e-10	3.797e-11	7.4041e-11	4.7136e-11	0	6.1593e-11	8.0757e-11	2.7847e-11	6.8557e-11	3.23114e-10	5.9934e-11
2024-05-29T18:13:07.966	4.01475e-09	8.83995e-10	4.93469e-10	2.52568e-10	1.36798e-10	1.2827e-10	1.25532e-10	8.7671e-11	5.2926e-11	8.8469e-11	8.2278e-11	1.13855e-10	1.09205e-10	9.7553e-11	6.737e-11	1.19182e-10	1.0948e-10	4.8318e-11	6.285e-11	8.9484e-11	4.3486e-11	8.5869e-11	1.6607e-11	7.0773e-11	7.3011e-11	9.2618e-11	7.2453e-11	9.4387e-11	7.7713e-11	8.2137e-11	2.4943e-11	5.0219e-11	6.9193e-11	4.0308e-11	7.7255e-11	5.5146e-11	4.5426e-11	3.57258e-10	7.5385e-11	1.8985e-11	5.058e-11	3.8486e-11	6.1231e-11	7.5435e-11	5.1821e-11	3.4105e-11	3.38762e-10	5.2614e-11	4.8936e-11
2024-05-29T18:13:11.430	3.56341e-09	7.39151e-10	6.47103e-10	2.82746e-10	2.03742e-10	1.6093e-10	8.3875e-11	9.6314e-11	8.444e-11	9.265e-11	6.7179e-11	1.08243e-10	8.4883e-11	8.9521e-11	5.0215e-11	8.1209e-11	1.00999e-10	4.8318e-11	4.6555e-10	7.1213e-11	1.29412e-10	6.4002e-11	5.2516e-11	5.2751e-11	6.2672e-11	1.29885e-10	9.0364e-11	4.19996e-10	5.4951e-11	1.03601e-10	4.3203e-11	4.3491e-11	6.4416e-11	4.7693e-11	5.7583e-11	7.1193e-11	5.8645e-11	3.2389e-11	4.2141e-11	7.3529e-11	5.4072e-11	4.3029e-11	7.4992e-11	5.1532e-11	4.3797e-11	4.403e-11	6.8557e-11	5.2614e-11	3.4603e-11
2024-05-29T18:13:14.883	4.5107e-09	1.13418e-09	5.00158e-10	2.37349e-10	1.52109e-10	1.55146e-10	1.15003e-10	5.6396e-11	1.3159e-10	4.67052e-10	9.0961e-11	1.43844e-10	1.16897e-10	6.129e-11	7.6154e-11	8.4274e-11	9.7138e-11	6.4424e-11	6.4912e-11	8.4892e-11	1.07778e-10	5.2258e-11	7.2388e-11	6.8779e-11	1.01885e-10	8.7865e-11	1.03877e-10	5.4494e-11	6.9508e-11	6.0662e-11	4.9886e-11	8.5151e-11	5.3597e-11	5.9786e-11	4.0717e-11	3.96386e-10	6.1508e-11	9.161e-11	4.9862e-11	6.2967e-11	6.6225e-11	4.7136e-11	6.7075e-11	7.7909e-11	3.41501e-10	4.8232e-11	5.2361e-11	5.2614e-11	6.3176e-11
2024-05-29T18:13:18.344	3.96412e-09	9.48859e-10	4.222e-10	3.24957e-10	1.77886e-10	1.13123e-10	9.0336e-11	1.26104e-10	9.7067e-11	8.8469e-11	5.2517e-11	1.18153e-10	9.191e-11	5.9212e-11	6.15e-11	6.5666e-11	4.83319e-10	9.797e-11	1.00036e-10	7.8351e-11	9.7237e-11	5.9583e-11	5.7528e-11	7.0773e-11	1.05935e-10	1.53123e-10	9.1964e-11	6.6741e-11	7.9632e-11	3.9157e-11	4.6664e-11	6.4017e-11	8.1871e-11	5.7004e-11	4.0717e-11	4.8634e-11	6.939e-11	6.4778e-11	6.5285e-11	5.3698e-11	4.6828e-11	6.0852e-11	5.8089e-11	8.2635e-11	5.1821e-11	2.7847e-11	2.7988e-11	7.7019e-11	3.9956e-11
2024-05-29T18:13:21.800	3.29237e-09	8.29422e-10	4.43829e-10	3.33185e-10	1.54329e-10	1.17094e-10	4.94506e-10	7.4605e-11	1.84032e-10	9.9229e-11	6.902e-11	1.35821e-10	1.03361e-10	3.8764e-11	1.02909e-10	7.638e-11	8.7468e-11	7.8904e-11	6.4912e-11	9.0963e-11	8.052e-11	8.0958e-11	7.4268e-11	1.04175e-10	8.8631e-11	1.58626e-10	1.09348e-10	6.4479e-11	7.1648e-11	5.2535e-11	5.2912e-11	7.9404e-11	6.6847e-11	6.2444e-11	6.0393e-11	6.8779e-11	6.6866e-11	3.7399e-11	6.5285e-11	6.5767e-11	3.3112e-11	3.83417e-10	2.7383e-11	6.1593e-11	4.3797e-11	5.9072e-11	7.1356e-11	7.4408e-11	1.9978e-11
2024-05-29T18:13:25.259	4.19998e-09	1.1418e-09	4.74746e-10	2.39952e-10	2.21351e-10	1.29452e-10	1.13773e-10	1.16263e-10	1.26649e-10	1.3294e-10	8.527e-11	8.9315e-11	6.305e-11	7.7527e-11	4.34582e-10	1.01978e-10	1.00999e-10	4.2613e-11	6.4912e-11	6.3274e-11	9.1512e-11	5.2258e-11	4.0678e-11	4.08949e-10	9.4751e-11	1.21937e-10	8.3661e-11	9.5947e-11	9.9824e-11	9.9061e-11	3.9439e-11	7.9404e-11	7.7875e-11	5.4078e-11	6.8133e-11	3.1839e-11	5.8645e-11	4.5805e-11	4.2141e-11	5.023e-11	4.2748e-11	6.0852e-11	3.8726e-11	6.7471e-11	6.1938e-11	4.403e-11	2.7988e-11	6.8888e-11	6.626e-11
2024-05-29T18:13:28.716	3.85389e-09	1.00359e-09	5.76485e-10	2.35597e-10	1.45237e-10	5.05602e-10	1.27754e-10	1.16263e-10	7.4848e-11	9.265e-11	8.527e-11	5.6928e-11	6.8707e-11	6.7141e-11	1.02909e-10	8.2756e-11	6.5843e-11	4.5555e-11	5.1318e-11	4.0018e-11	6.3656e-11	5.7246e-11	4.47771e-10	7.4601e-11	7.6757e-11	1.18367e-10	1.26648e-10	4.8741e-11	7.3725e-11	3.5023e-11	3.5275e-11	4.18663e-10	4.3762e-11	6.2444e-11	4.8177e-11	1.8382e-11	3.709e-11	3.2389e-11	5.9597e-11	3.797e-11	8.1108e-11	6.666e-11	3.8726e-11	8.0307e-11	3.9173e-11	4.8232e-11	4.8477e-11	6.2886e-11	5.9934e-11
2024-05-29T18:13:32.176	4.53451e-09	1.2608e-09	4.85444e-10	2.63798e-10	5.86742e-10	1.37438e-10	1.02038e-10	1.40047e-10	9.9655e-11	9.4003e-11	7.2562e-11	9.07e-11	8.4883e-11	5.0044e-11	9.7886e-11	7.638e-11	8.4502e-11	6.6407e-11	5.1318e-11	6.1129e-11	1.15052e-10	9.3482e-11	9.2463e-11	8.1722e-11	8.0329e-11	1.02857e-10	5.6639e-11	1.00483e-10	8.1506e-11	7.6332e-11	4.16633e-10	6.4017e-11	6.4416e-11	5.9786e-11	4.8177e-11	3.6764e-11	5.8645e-11	6.9968e-11	6.2506e-11	5.3698e-11	7.1531e-11	3.333e-11	2.7383e-11	1.01207e-10	3.9173e-11	6.8211e-11	6.2584e-11	3.4444e-11	2.52704e-10
2024-05-29T18:13:35.633	3.70194e-09	1.01747e-09	4.50585e-10	2.76075e-10	1.4288e-10	1.66513e-10	1.3833e-10	1.25049e-10	8.444e-11	9.265e-11	6.902e-11	1.10522e-10	8.6334e-11	6.129e-11	8.5512e-11	1.17034e-10	7.1417e-11	8.2125e-11	7.2574e-11	7.6629e-11	1.50639e-10	5.9583e-11	8.9431e-11	4.0861e-11	5.8023e-11	7.5622e-11	1.13278e-10	7.7067e-11	9.83e-11	6.5523e-11	7.483e-11	6.6434e-11	5.6496e-11	5.0986e-11	4.4603e-11	6.0966e-11	1.8545e-11	3.2389e-11	3.85312e-10	4.2452e-11	3.8235e-11	3.8486e-11	5.4767e-11	6.7471e-11	6.4961e-11	5.5694e-11	3.9581e-11	3.49569e-10	3.9956e-11
2024-05-29T18:13:39.092	3.91627e-09	7.57008e-10	5.18546e-10	6.36146e-10	2.55594e-10	7.999e-11	1.25532e-10	1.83468e-10	1.03417e-10	1.22049e-10	9.3677e-11	8.2042e-11	1.12566e-10	1.17363e-10	9.5276e-11	1.2741e-10	8.1428e-11	4.2613e-11	8.7391e-11	6.1129e-11	4.75511e-10	4.3722e-11	8.1357e-11	1.10652e-10	6.9061e-11	1.14687e-10	7.2453e-11	1.00483e-10	9.1951e-11	4.45776e-10	5.5775e-11	6.4017e-11	6.9193e-11	4.4155e-11	4.8177e-11	5.5146e-11	9.0853e-11	4.1814e-11	3.7692e-11	8.4905e-11	6.6225e-11	4.3029e-11	5.8089e-11	6.7471e-11	5.8759e-11	3.4105e-11	2.7988e-11	5.2614e-11	6.3176e-11
2024-05-29T18:13:42.550	4.74493e-09	9.12986e-10	7.93489e-10	3.57764e-10	1.66013e-10	1.69236e-10	1.609e-10	1.10417e-10	7.4848e-11	8.4079e-11	1.26675e-10	5.6928e-11	9.7166e-11	7.7527e-11	6.5472e-11	5.2822e-11	1.48952e-10	7.5544e-11	6.072e-11	4.64397e-10	1.25173e-10	1.08365e-10	5.2516e-11	1.01469e-10	8.7034e-11	1.25405e-10	1.13278e-10	7.5115e-11	4.62701e-10	8.3983e-11	8.9934e-11	7.3207e-11	7.7875e-11	1.8026e-11	4.4603e-11	7.3528e-11	7.8681e-11	4.5805e-11	6.2506e-11	4.6504e-11	7.647e-11	8.8183e-11	5.123e-11	5.1532e-11	6.7849e-11	7.0996e-11	5.9372e-11	6.2886e-11	3.9956e-11
2024-05-29T18:13:46.010	4.19998e-09	1.00426e-09	5.74385e-10	2.60639e-10	2.36942e-10	2.37418e-10	9.7814e-11	1.18521e-10	1.05851e-10	3.553e-11	1.33422e-10	7.5721e-11	1.06906e-10	7.252e-11	7.6154e-11	7.9632e-11	5.2964e-11	5.5793e-11	6.4912e-11	8.4892e-11	8.8511e-11	4.6741e-11	5.9877e-11	5.0044e-11	1.04602e-10	1.2426e-10	1.10673e-10	1.07618e-10	8.513e-11	8.2137e-11	3.5275e-11	8.3279e-11	6.1889e-11	5.7004e-11	5.1504e-11	6.0966e-11	3.83667e-10	3.7399e-11	7.0516e-11	6.0037e-11	6.0454e-11	5.4428e-11	8.215e-11	7.0226e-11	6.4961e-11	3.67327e-10	4.4253e-11	6.2886e-11	6.9206e-11
2024-05-29T18:13:49.467	4.34185e-09	1.07369e-09	5.63231e-10	2.63012e-10	1.89014e-10	1.4394e-10	1.24406e-10	1.17398e-10	9.3048e-11	9.7949e-11	8.3787e-11	7.7349e-11	5.6832e-11	9.6261e-11	5.9415e-11	1.20241e-10	1.20566e-10	2.2777e-11	9.4625e-11	1.10806e-10	8.6971e-11	1.03202e-10	5.7528e-11	1.22583e-10	4.4316e-11	8.1096e-11	3.52056e-10	7.7067e-11	1.04263e-10	7.4296e-11	7.688e-11	5.8887e-11	4.7268e-11	8.645e-11	8.3445e-11	4.11034e-10	8.0837e-11	4.1814e-11	5.3305e-11	4.6504e-11	6.0454e-11	5.0913e-11	5.8089e-11	8.0307e-11	3.61687e-10	4.403e-11	7.6648e-11	3.4444e-11	7.4751e-11
2024-05-29T18:13:52.926	3.70014e-09	6.76891e-10	3.91717e-10	2.92821e-10	1.7106e-10	1.09008e-10	1.66064e-10	7.0963e-11	4.7793e-10	8.9884e-11	9.3677e-11	1.24317e-10	1.13664e-10	7.0772e-11	8.9827e-11	8.4274e-11	9.9728e-11	4.54695e-10	6.4912e-11	9.0963e-11	9.5838e-11	5.7246e-11	1.18597e-10	5.2751e-11	9.3259e-11	1.69939e-10	9.8101e-11	7.897e-11	4.2565e-11	6.0662e-11	4.9886e-11	1.7755e-11	6.9193e-11	3.1222e-11	2.48341e-10	8.8157e-11	5.5636e-11	5.2891e-11	6.2506e-11	4.6504e-11	7.8823e-11	5.0913e-11	3.3538e-11	6.4599e-11	9.3933e-11	3.4105e-11	5.9372e-11	0	6.626e-11
2024-05-29T18:13:56.383	4.40192e-09	1.06682e-09	4.98948e-10	3.61794e-10	2.11123e-10	1.40729e-10	8.5536e-11	5.61841e-10	1.02179e-10	1.01742e-10	8.074e-11	8.5026e-11	7.8812e-11	8.0693e-11	8.0969e-11	9.6876e-11	1.04718e-10	8.8217e-11	6.285e-11	9.8024e-11	6.1498e-11	7.0112e-11	5.9877e-11	5.7786e-11	7.8563e-11	1.01458e-10	1.17076e-10	7.7067e-11	7.7713e-11	5.5377e-11	3.9439e-11	3.0753e-11	5.6496e-11	3.83242e-10	6.0393e-11	6.6277e-11	4.1468e-11	6.7423e-11	3.2643e-11	7.5941e-11	3.8235e-11	7.9342e-11	3.98708e-10	5.8432e-11	5.8759e-11	6.2268e-11	7.405e-11	6.2886e-11	5.2857e-11
2024-05-29T18:13:59.842	4.08128e-09	1.34239e-09	5.8481e-10	2.58244e-10	2.05405e-10	1.41808e-10	1.08714e-10	1.0921e-10	1.34461e-10	5.9453e-11	1.21625e-10	7.7349e-11	8.6334e-11	5.7059e-11	5.0215e-11	5.09891e-10	1.04718e-10	8.0531e-11	5.3822e-11	1.13189e-10	1.03951e-10	6.4002e-11	5.2516e-11	7.6444e-11	4.33233e-10	1.70779e-10	1.2893e-10	8.9543e-11	7.3725e-11	7.2203e-11	5.5775e-11	6.8765e-11	8.5681e-11	7.8574e-11	5.1504e-11	6.6277e-11	3.2121e-11	6.7423e-11	9.9725e-11	6.5767e-11	6.6225e-11	2.7214e-11	5.8089e-11	5.509e-11	4.7977e-11	5.9072e-11	4.8477e-11	7.1701e-11	7.4751e-11
2024-05-29T18:14:03.306	3.68931e-09	1.162e-09	6.7543e-10	2.12486e-10	2.06231e-10	1.4394e-10	9.0336e-11	1.62801e-10	5.7536e-11	1.29086e-10	7.427e-11	1.16024e-10	8.7761e-11	7.9126e-11	4.466e-10	8.5766e-11	1.08309e-10	6.8332e-11	6.691e-11	1.09595e-10	6.3656e-11	5.9583e-11	7.2388e-11	4.75347e-10	8.8631e-11	1.2878e-10	1.21956e-10	8.6163e-11	7.7713e-11	4.2895e-11	6.3593e-11	5.3266e-11	7.3662e-11	6.9814e-11	4.0717e-11	6.0966e-11	3.709e-11	3.2389e-11	6.2506e-11	6.5767e-11	4.6828e-11	3.8486e-11	9.6815e-11	1.9477e-11	7.3286e-11	4.403e-11	4.4253e-11	4.8711e-11	4.4672e-11
2024-05-29T18:14:06.764	3.30258e-09	9.35389e-10	5.23763e-10	1.98372e-10	1.35549e-10	1.62812e-10	1.40349e-10	1.01669e-10	1.24631e-10	5.5043e-11	4.4786e-11	9.4733e-11	1.14752e-10	4.55095e-10	7.448e-11	1.00727e-10	7.9847e-11	5.8071e-11	7.0736e-11	1.27597e-10	8.6971e-11	4.6741e-11	4.37806e-10	9.2878e-11	7.1063e-11	1.45462e-10	1.52743e-10	7.897e-11	8.8606e-11	4.6332e-11	7.055e-11	8.6983e-11	9.621e-11	7.2105e-11	8.7328e-11	6.3677e-11	8.0837e-11	6.4778e-11	4.6164e-11	6.8452e-11	5.7352e-11	0	5.8089e-11	4.7709e-11	4.7977e-11	4.8232e-11	5.5976e-11	7.9545e-11	6.3176e-11
2024-05-29T18:14:10.223	3.7476e-09	1.20998e-09	3.83181e-10	2.65364e-10	1.27797e-10	8.5513e-11	1.1622e-10	5.1482e-11	1.19416e-10	7.9447e-11	8.074e-11	4.7367e-11	8.1904e-11	9.3623e-11	9.2591e-11	9.2866e-11	1.08309e-10	7.2029e-11	7.7827e-11	7.3063e-11	7.8825e-11	5.7246e-11	5.7528e-11	8.6679e-11	5.8023e-11	1.3098e-10	1.24324e-10	5.9696e-11	5.2131e-11	4.12549e-10	7.483e-11	6.6434e-11	6.1889e-11	4.0308e-11	4.0717e-11	3.1839e-11	4.5426e-11	5.2891e-11	2.2772e-10	3.797e-11	2.7036e-11	0	4.3297e-11	6.4599e-11	9.7932e-11	2.7847e-11	4.4253e-11	3.30974e-10	0
2024-05-29T18:14:13.675	4.67056e-09	9.39664e-10	5.40791e-10	2.20146e-10	2.32594e-10	1.31785e-10	1.33136e-10	1.02964e-10	6.3831e-11	9.265e-11	4.4786e-11	3.79919e-10	1.29021e-10	1.04973e-10	8.4025e-11	8.1209e-11	9.0336e-11	8.9675e-11	5.3822e-11	5.6594e-11	4.68932e-10	4.6741e-11	9.096e-11	1.01469e-10	1.12361e-10	1.13433e-10	8.7077e-11	9.2801e-11	9.0294e-11	5.808e-11	6.1098e-11	0	5.0532e-11	4.7693e-11	2.5752e-11	6.0966e-11	1.8545e-11	5.6099e-11	1.8846e-11	7.3529e-11	6.3405e-11	7.4528e-11	2.7383e-11	4.7709e-11	4.3797e-11	1.9691e-11	5.2361e-11	5.9659e-11	5.9934e-11
2024-05-29T18:14:17.137	3.27597e-09	1.20389e-09	4.84198e-10	2.40814e-10	1.36798e-10	1.50156e-10	8.5536e-11	1.27149e-10	9.7067e-11	1.10085e-10	4.93404e-10	9.07e-11	1.1583e-10	5.0044e-11	6.5472e-11	9.5558e-11	7.1417e-11	5.5793e-11	6.691e-11	3.16373e-10	9.0024e-11	7.5729e-11	4.6971e-11	5.2751e-11	8.3749e-11	1.20759e-10	1.31172e-10	4.2211e-11	6.9508e-11	5.5377e-11	9.1647e-11	4.6976e-11	5.9254e-11	6.2444e-11	7.0524e-11	3.1839e-11	1.81705e-10	2.6445e-11	6.7951e-11	3.2883e-11	4.6828e-11	2.7214e-11	5.123e-11	4.3553e-11	5.1821e-11	5.5694e-11	4.4253e-11	2.8123e-11	4.4672e-11
2024-05-29T18:14:20.592	4.20478e-09	8.0324e-10	5.94545e-10	2.41672e-10	2.00374e-10	7.6086e-11	1.55565e-10	7.8077e-11	1.00925e-10	5.5043e-11	7.0813e-11	9.07e-11	9.8436e-11	1.02559e-10	8.4025e-11	1.15945e-10	1.02254e-10	7.2029e-11	6.285e-11	8.0037e-11	8.052e-11	4.9576e-11	3.7134e-11	9.4364e-11	8.5407e-11	1.056e-10	7.4438e-11	4.46721e-10	7.3725e-11	4.2895e-11	7.8877e-11	7.1021e-11	5.6496e-11	4.0308e-11	6.5654e-11	5.8129e-11	3.709e-11	6.202e-11	3.2643e-11	4.2452e-11	3.3112e-11	9.0258e-11	4.3297e-11	4.7709e-11	8.3098e-11	5.9072e-11	3.9581e-11	4.4467e-11	6.3176e-11
2024-05-29T18:14:24.053	3.40497e-09	1.43334e-09	3.99401e-10	3.02561e-10	2.1669e-10	1.64673e-10	1.53745e-10	1.12792e-10	1.2153e-10	4.63797e-10	6.7179e-11	1.02324e-10	8.7761e-11	7.252e-11	5.0215e-11	5.517e-11	7.6586e-11	8.8217e-11	7.2574e-11	8.6449e-11	5.1975e-11	2.8623e-11	3.3214e-11	8.6679e-11	8.0329e-11	1.29885e-10	1.48876e-10	5.7154e-11	7.1648e-11	4.6332e-11	3.5275e-11	6.1506e-11	5.0532e-11	5.9786e-11	8.3445e-11	4.08146e-10	6.939e-11	7.2423e-11	7.299e-11	4.2452e-11	6.3405e-11	6.3822e-11	4.3297e-11	7.2877e-11	3.5092e-10	3.9382e-11	6.8557e-11	2.8123e-11	6.9206e-11
2024-05-29T18:14:27.509	4.85989e-09	1.16899e-09	4.17884e-10	3.7084e-10	2.28163e-10	1.2827e-10	1.24406e-10	7.9756e-11	1.10558e-10	1.02975e-10	1.1743e-10	1.16024e-10	8.1904e-11	2.741e-11	6.9216e-11	8.1209e-11	1.04718e-10	4.668e-10	6.4912e-11	1.20055e-10	9.7237e-11	4.0479e-11	5.7528e-11	1.04175e-10	8.8631e-11	1.57722e-10	1.41854e-10	4.5593e-11	1.04263e-10	6.0662e-11	5.8497e-11	8.3279e-11	3.0944e-11	6.4994e-11	5.4628e-11	0	6.4243e-11	3.7399e-11	4.9862e-11	3.797e-11	3.3112e-11	1.9243e-11	4.3297e-11	7.2877e-11	7.8346e-11	5.5694e-11	3.4278e-11	3.4444e-11	6.626e-11
2024-05-29T18:14:30.967	4.48074e-09	9.79341e-10	4.35584e-10	2.59045e-10	1.27797e-10	1.13123e-10	1.40349e-10	1.17398e-10	1.04641e-10	8.8469e-11	1.22651e-10	9.604e-11	7.3932e-11	5.7059e-11	5.7254e-11	7.9632e-11	1.00999e-10	6.6407e-11	5.8511e-11	6.9314e-11	7.1643e-11	1.09618e-10	8.4679e-11	8.6679e-11	8.0329e-11	5.00479e-10	1.15823e-10	8.787e-11	8.1506e-11	4.6332e-11	4.3203e-11	6.8765e-11	8.7524e-11	6.4994e-11	4.4603e-11	5.5146e-11	6.6866e-11	7.4799e-11	4.6164e-11	6.8452e-11	4.2748e-11	5.7729e-11	6.7075e-11	4.7709e-11	5.5399e-11	5.5694e-11	3.4278e-11	5.6247e-11	5.6506e-11
2024-05-29T18:14:34.426	4.11905e-09	9.25339e-10	6.23806e-10	2.1635e-10	1.54329e-10	1.22187e-10	1.609e-10	4.93263e-10	1.03417e-10	1.00494e-10	1.14183e-10	1.14945e-10	7.0492e-11	1.08492e-10	7.448e-11	1.09185e-10	9.9728e-11	8.5226e-11	7.4366e-11	6.9314e-11	1.1268e-10	7.2033e-11	4.3938e-11	8.3407e-11	8.2057e-11	1.3098e-10	9.8101e-11	3.4465e-11	8.8606e-11	3.9157e-11	3.9439e-11	5.3266e-11	8.3798e-11	6.7448e-11	4.4603e-11	1.07184e-10	3.709e-11	4.9475e-11	7.5385e-11	7.3529e-11	4.6828e-11	2.7214e-11	3.42566e-10	1.9477e-11	6.4961e-11	3.4105e-11	6.8557e-11	5.9659e-11	3.9956e-11
2024-05-29T18:14:37.885	4.10267e-09	1.0687e-09	5.53491e-10	2.53386e-10	1.46398e-10	1.68333e-10	1.2327e-10	8.6146e-11	1.04641e-10	6.5514e-11	1.09703e-10	9.7329e-11	1.1583e-10	6.7141e-11	7.7792e-11	4.31776e-10	1.24722e-10	6.4424e-11	2.295e-11	3.6532e-11	7.3504e-11	9.9153e-11	5.2516e-11	8.0001e-11	4.05469e-10	1.61307e-10	9.1964e-11	9.7483e-11	6.7301e-11	4.6332e-11	5.2912e-11	4.3491e-11	4.7268e-11	4.4155e-11	6.0393e-11	8.2207e-11	6.6866e-11	9.3499e-11	1.04931e-10	5.6956e-11	2.7036e-11	4.7136e-11	3.3538e-11	8.49e-11	5.1821e-11	3.9382e-11	3.9581e-11	7.4408e-11	5.2857e-11
2024-05-29T18:14:41.347	3.86436e-09	9.41794e-10	5.00158e-10	3.35044e-10	1.76927e-10	1.64673e-10	1.2885e-10	1.01669e-10	7.653e-11	9.265e-11	1.16358e-10	6.5099e-11	8.3407e-11	4.187e-11	4.3603e-10	1.21291e-10	1.63637e-10	5.5793e-11	7.0736e-11	7.4867e-11	7.5319e-11	4.0479e-11	7.0457e-11	4.66185e-10	6.6999e-11	1.15926e-10	1.11983e-10	9.2801e-11	6.0196e-11	4.2895e-11	8.0825e-11	3.9702e-11	4.16697e-10	7.4324e-11	6.0393e-11	4.5026e-11	5.8645e-11	2.6445e-11	6.5285e-11	5.023e-11	4.2748e-11	5.4428e-11	9.082e-11	8.7105e-11	1.1914e-10	3.9382e-11	5.9372e-11	3.9773e-11	6.626e-11
2024-05-29T18:14:44.801	4.76334e-09	1.16428e-09	5.2203e-10	3.09999e-10	2.27416e-10	1.04732e-10	1.33136e-10	1.3226e-10	6.5795e-11	6.926e-11	8.9572e-11	1.17094e-10	4.9845e-11	4.77124e-10	8.6974e-11	1.2741e-10	1.11785e-10	5.5793e-11	4.8684e-11	5.4185e-11	8.218e-11	9.3482e-11	7.0457e-11	9.4364e-11	4.4316e-11	1.33141e-10	1.15823e-10	5.4494e-11	7.5745e-11	4.6332e-11	4.6664e-11	7.1021e-11	6.9193e-11	5.0986e-11	7.2837e-11	5.1992e-11	6.6866e-11	5.6099e-11	4.6164e-11	3.83953e-10	6.6225e-11	6.0852e-11	6.9814e-11	6.4599e-11	7.062e-11	5.2097e-11	3.9581e-11	7.1701e-11	5.2857e-11
2024-05-29T18:14:48.261	3.78692e-09	9.80023e-10	5.82222e-10	2.63798e-10	2.19033e-10	1.66513e-10	1.39343e-10	1.61165e-10	1.1396e-10	8.102e-11	7.5939e-11	1.16024e-10	4.91668e-10	6.3301e-11	1.20933e-10	1.22332e-10	6.1848e-11	3.2212e-11	9.4625e-11	8.1687e-11	8.6971e-11	4.17738e-10	3.7134e-11	1.00088e-10	4.7375e-11	1.73272e-10	1.44905e-10	4.8741e-11	7.5745e-11	5.808e-11	5.8497e-11	1.12294e-10	4.3762e-11	3.1222e-11	4.0717e-11	7.1193e-11	8.4985e-11	4.1814e-11	6.5285e-11	7.3529e-11	6.6225e-11	4.3029e-11	3.3538e-11	5.1532e-11	6.7849e-11	6.2268e-11	1.9791e-11	6.2886e-11	3.4603e-11
2024-05-29T18:14:51.718	3.45015e-09	1.42212e-09	4.81695e-10	2.49266e-10	1.87205e-10	1.31785e-10	1.3833e-10	1.52721e-10	7.8176e-11	9.7949e-11	9.0961e-11	4.77075e-10	9.191e-11	6.898e-11	9.3943e-11	9.5558e-11	8.5997e-11	6.4424e-11	6.072e-11	1.14362e-10	4.61675e-10	7.0112e-11	1.08899e-10	8.1722e-11	9.9093e-11	1.01458e-10	1.14558e-10	6.4479e-11	1.12616e-10	6.7822e-11	4.3203e-11	4.3491e-11	7.3662e-11	5.0986e-11	7.0524e-11	5.8129e-11	6.939e-11	4.5805e-11	5.3305e-11	7.5941e-11	8.5496e-11	5.4428e-11	3.8726e-11	5.509e-11	6.4961e-11	2.7847e-11	4.8477e-11	5.9659e-11	4.4672e-11
2024-05-29T18:14:55.177	5.07406e-09	9.15907e-10	5.19128e-10	2.98426e-10	2.31861e-10	1.58065e-10	9.4893e-11	1.16263e-10	6.9558e-11	8.9884e-11	4.93658e-10	7.4056e-11	9.3252e-11	7.7527e-11	7.6154e-11	7.638e-11	5.7578e-11	6.0264e-11	7.0736e-11	6.7361e-11	8.052e-11	7.7511e-11	6.2137e-11	8.5059e-11	6.6999e-11	1.34205e-10	1.53695e-10	5.9696e-11	9.6752e-11	8.7559e-11	5.8497e-11	5.6147e-11	6.4416e-11	9.5386e-11	4.4603e-11	7.3528e-11	3.8945e-10	5.2891e-11	7.9958e-11	7.5941e-11	5.058e-11	6.3822e-11	1.9363e-11	6.7471e-11	6.7849e-11	3.59323e-10	3.4278e-11	5.9659e-11	6.3176e-11
2024-05-29T18:14:58.641	5.05545e-09	9.43211e-10	3.13835e-10	2.30262e-10	1.7106e-10	1.75424e-10	1.32081e-10	1.12792e-10	9.4407e-11	4.83779e-10	8.527e-11	1.09389e-10	1.03361e-10	7.7527e-11	6.3517e-11	9.6876e-11	5.9752e-11	4.8318e-11	5.3822e-11	5.4185e-11	8.052e-11	1.6525e-11	5.7528e-11	6.8779e-11	6.6999e-11	1.45462e-10	8.3661e-11	5.9696e-11	9.5178e-11	3.0331e-11	5.8497e-11	8.8776e-11	4.7268e-11	6.2444e-11	6.3079e-11	3.87768e-10	5.2454e-11	1.07422e-10	4.2141e-11	5.6956e-11	5.058e-11	6.666e-11	4.3297e-11	6.7471e-11	3.52556e-10	8.1187e-11	3.4278e-11	2.8123e-11	6.3176e-11
2024-05-29T18:15:02.094	3.86436e-09	1.42259e-09	4.80439e-10	2.22019e-10	1.58678e-10	1.22187e-10	9.6365e-11	1.34249e-10	4.76864e-10	8.102e-11	9.0961e-11	6.8822e-11	5.8978e-11	8.8111e-11	5.5007e-11	4.7779e-11	1.15156e-10	4.67355e-10	6.691e-11	9.5263e-11	9.9977e-11	6.8136e-11	4.6971e-11	8.6679e-11	7.6757e-11	1.43483e-10	9.3536e-11	9.1187e-11	8.1506e-11	7.2203e-11	7.8877e-11	6.1506e-11	6.4416e-11	3.6052e-11	6.0393e-11	6.3677e-11	4.1468e-11	6.4778e-11	6.7951e-11	6.0037e-11	4.2748e-11	5.4428e-11	4.3297e-11	6.1593e-11	5.5399e-11	6.8211e-11	5.5976e-11	5.9659e-11	7.2032e-11
2024-05-29T18:15:05.552	4.08458e-09	1.08974e-09	5.24915e-10	2.27548e-10	1.56519e-10	1.73678e-10	8.8765e-11	1.23985e-10	9.837e-11	9.5337e-11	7.0813e-11	1.02324e-10	1.09205e-10	7.252e-11	6.737e-11	1.21291e-10	8.5997e-11	9.2523e-11	6.285e-11	8.4892e-11	7.7092e-11	9.201e-11	4.9821e-11	8.827e-11	9.9093e-11	4.60302e-10	1.0103e-10	9.1187e-11	3.0098e-11	5.2535e-11	3.0549e-11	4.6976e-11	1.30065e-10	6.2444e-11	5.4628e-11	8.6219e-11	7.1825e-11	5.2891e-11	5.3305e-11	6.5767e-11	3.3112e-11	5.0913e-11	9.6815e-11	4.3553e-11	5.1821e-11	6.5307e-11	5.2361e-11	3.4444e-11	7.2032e-11
2024-05-29T18:15:09.011	4.19837e-09	9.53774e-10	4.88546e-10	2.18256e-10	1.30432e-10	1.37438e-10	1.02038e-10	5.22487e-10	1.33511e-10	1.19962e-10	7.7572e-11	7.7349e-11	8.6334e-11	9.6261e-11	7.7792e-11	1.12616e-10	1.0948e-10	7.3808e-11	5.6216e-11	8.798e-11	1.22996e-10	5.2258e-11	7.4268e-11	6.8779e-11	7.4907e-11	1.3098e-10	1.17076e-10	5.1698e-11	9.9824e-11	6.7822e-11	5.8497e-11	7.9404e-11	3.5731e-11	6.7448e-11	4.8177e-11	7.3528e-11	8.6985e-11	5.2891e-11	7.299e-11	5.6956e-11	5.4072e-11	4.7136e-11	3.78941e-10	5.1532e-11	5.1821e-11	6.2268e-11	9.4913e-11	5.2614e-11	4.4672e-11
2024-05-29T18:15:12.474	4.07963e-09	1.26503e-09	3.72795e-10	3.05287e-10	1.35549e-10	1.59026e-10	8.3875e-11	4.56134e-10	6.9558e-11	1.54871e-10	6.1326e-11	9.3408e-11	1.14752e-10	9.8828e-11	6.15e-11	8.2756e-11	1.0948e-10	8.6734e-11	6.285e-11	8.798e-11	8.8511e-11	6.1833e-11	7.0457e-11	7.6444e-11	5.5553e-11	1.44476e-10	1.25492e-10	1.08989e-10	5.2131e-11	5.808e-11	6.1098e-11	6.6434e-11	5.3597e-11	3.6277e-10	5.4628e-11	6.3677e-11	5.5636e-11	5.6099e-11	5.6539e-11	5.3698e-11	8.3331e-11	5.7729e-11	3.87743e-10	6.1593e-11	6.1938e-11	5.2097e-11	7.405e-11	5.6247e-11	4.4672e-11
2024-05-29T18:15:15.928	3.40101e-09	1.02857e-09	4.664e-10	3.74176e-10	2.20581e-10	1.47081e-10	3.85459e-10	7.636e-11	1.04641e-10	7.2814e-11	8.074e-11	1.09389e-10	8.4883e-11	7.9126e-11	7.2768e-11	5.15087e-10	7.1417e-11	9.797e-11	4.2935e-11	8.0037e-11	6.3656e-11	4.6741e-11	5.7528e-11	6.6726e-11	4.02343e-10	1.2426e-10	1.31172e-10	8.6163e-11	9.5178e-11	4.2895e-11	6.8309e-11	8.3279e-11	3.9949e-11	4.4155e-11	8.3445e-11	5.1992e-11	4.9066e-11	4.5805e-11	5.9597e-11	7.1036e-11	3.8235e-11	8.1642e-11	6.1231e-11	6.4599e-11	2.7699e-11	6.2268e-11	7.6648e-11	3.4444e-11	5.2857e-11
2024-05-29T18:15:19.392	3.79757e-09	8.64127e-10	5.37429e-10	3.26275e-10	1.72052e-10	1.11769e-10	1.20966e-10	1.27149e-10	1.45381e-10	9.7949e-11	3.8786e-11	8.5026e-11	9.8436e-11	5.9212e-11	4.38912e-10	9.4221e-11	1.71252e-10	1.18355e-10	6.885e-11	8.4892e-11	8.8511e-11	8.8992e-11	1.06336e-10	4.76808e-10	9.622e-11	1.19569e-10	8.3661e-11	4.8741e-11	7.7713e-11	7.8315e-11	7.2721e-11	7.3207e-11	8.9329e-11	6.4994e-11	3.6418e-11	1.8382e-11	5.2454e-11	7.2423e-11	3.7692e-11	7.1036e-11	5.4072e-11	5.7729e-11	5.123e-11	5.509e-11	5.8759e-11	3.4105e-11	5.2361e-11	5.6247e-11	4.4672e-11
2024-05-29T18:15:22.844	3.7958e-09	9.86137e-10	6.2815e-10	2.76824e-10	1.7106e-10	1.4394e-10	1.2327e-10	1.0799e-10	1.24631e-10	8.4079e-11	5.2517e-11	9.7329e-11	7.0492e-11	4.5537e-10	6.737e-11	8.7232e-11	8.4502e-11	6.4424e-11	3.6287e-11	5.4185e-11	1.1268e-10	5.2258e-11	4.3401e-10	8.5059e-11	9.3259e-11	1.35277e-10	1.20754e-10	4.5593e-11	4.2565e-11	5.2535e-11	5.2912e-11	6.6434e-11	3.9949e-11	7.8574e-11	4.8177e-11	4.5026e-11	4.1468e-11	4.5805e-11	4.9862e-11	6.8452e-11	6.3405e-11	5.4428e-11	3.3538e-11	2.7545e-11	7.5857e-11	3.9382e-11	0	8.1993e-11	8.9344e-11
2024-05-29T18:15:26.302	3.14811e-09	1.03698e-09	4.45867e-10	2.88546e-10	1.25106e-10	1.36328e-10	9.7814e-11	1.19634e-10	9.7067e-11	1.02975e-10	9.8885e-11	7.5721e-11	1.03361e-10	4.76861e-10	5.0215e-11	9.5558e-11	7.9847e-11	8.5226e-11	6.285e-11	9.8024e-11	8.052e-11	3.3051e-11	4.0678e-11	5.2751e-11	1.05935e-10	1.2426e-10	9.8101e-11	8.9543e-11	1.02804e-10	7.8315e-11	4.9886e-11	9.0534e-11	7.1463e-11	5.4078e-11	5.7583e-11	4.5026e-11	4.5426e-11	6.202e-11	6.5285e-11	2.94116e-10	4.2748e-11	6.9382e-11	1.00613e-10	5.509e-11	8.7593e-11	4.403e-11	3.9581e-11	6.8888e-11	5.9934e-11
2024-05-29T18:15:29.761	3.87306e-09	1.03052e-09	4.61188e-10	2.26636e-10	2.48164e-10	1.67426e-10	7.502e-11	1.00357e-10	1.12838e-10	7.7842e-11	9.6316e-11	8.5026e-11	9.191e-11	5.7059e-11	6.737e-11	9.946e-11	6.3877e-11	6.2378e-11	6.072e-11	8.1687e-11	8.052e-11	4.9576e-11	4.9821e-11	5.5326e-11	1.03252e-10	1.45462e-10	9.3536e-11	4.2211e-11	7.5745e-11	4.9531e-11	2.4943e-11	4.6976e-11	7.9898e-11	8.831e-11	6.3079e-11	8.2207e-11	5.8645e-11	3.2389e-11	3.64468e-10	7.3529e-11	3.8235e-11	7.6973e-11	6.1231e-11	4.3553e-11	5.5399e-11	5.2097e-11	4.8477e-11	3.618e-10	3.4603e-11
2024-05-29T18:15:33.219	3.55016e-09	8.31031e-10	5.6644e-10	2.71536e-10	1.36798e-10	1.69236e-10	1.1622e-10	1.12792e-10	7.653e-11	1.3294e-10	1.01389e-10	1.05915e-10	1.09205e-10	8.0693e-11	9.1219e-11	8.7232e-11	6.9609e-11	8.369e-11	5.3822e-11	1.27597e-10	5.6936e-11	9.0514e-11	7.4268e-11	5.7786e-11	9.7667e-11	1.01458e-10	7.8258e-11	7.3112e-11	3.96639e-10	6.5523e-11	9.1647e-11	9.3952e-11	5.9254e-11	5.4078e-11	6.0393e-11	8.4237e-11	7.6464e-11	3.83687e-10	4.9862e-11	3.2883e-11	5.058e-11	6.3822e-11	5.8089e-11	4.3553e-11	0	7.6262e-11	3.45062e-10	6.2886e-11	6.626e-11
2024-05-29T18:15:36.677	4.21278e-09	8.37436e-10	5.8274e-10	3.35662e-10	2.27416e-10	1.52172e-10	9.188e-11	1.27149e-10	6.5795e-11	9.4003e-11	8.6728e-11	1.14945e-10	7.3932e-11	8.8111e-11	4.2013e-11	8.1209e-11	7.8233e-11	7.2029e-11	3.6287e-11	9.0963e-11	9.1512e-11	1.23665e-10	5.5079e-11	1.00088e-10	1.09836e-10	1.59525e-10	9.9577e-11	4.67192e-10	1.09902e-10	4.6332e-11	5.2912e-11	1.05041e-10	5.0532e-11	4.0308e-11	8.3445e-11	4.1103e-11	3.709e-11	5.2891e-11	3.2643e-11	6.0037e-11	7.1531e-11	4.3029e-11	6.1231e-11	1.9477e-11	7.8346e-11	3.9382e-11	3.9581e-11	6.2886e-11	0
2024-05-29T18:15:40.140	4.02313e-09	9.01205e-10	5.68038e-10	2.85661e-10	1.73038e-10	1.27077e-10	9.7814e-11	1.74585e-10	8.8848e-11	1.13473e-10	9.3677e-11	1.04732e-10	7.5594e-11	3.5386e-11	8.4025e-11	9.0093e-11	8.4502e-11	2.7897e-11	4.8684e-11	6.3274e-11	9.2976e-11	5.9583e-11	3.3214e-11	5.7786e-11	1.16046e-10	1.00039e-10	4.80293e-10	7.897e-11	5.7633e-11	4.6332e-11	7.2721e-11	6.6434e-11	4.3762e-11	5.9786e-11	7.2837e-11	4.8634e-11	4.1468e-11	1.87e-11	6.2506e-11	4.6504e-11	4.6828e-11	7.4528e-11	6.1231e-11	5.8432e-11	7.8346e-11	4.8232e-11	5.5976e-11	5.6247e-11	7.2032e-11
2024-05-29T18:15:43.594	3.5653e-09	1.21053e-09	5.23186e-10	2.97731e-10	1.96083e-10	1.59981e-10	1.33136e-10	1.44701e-10	4.70141e-10	8.8469e-11	9.7609e-11	1.23313e-10	7.3932e-11	8.3739e-11	7.1014e-11	9.2866e-11	6.7752e-11	8.369e-11	5.1318e-11	9.8024e-11	8.8511e-11	7.5729e-11	5.9877e-11	1.02831e-10	7.3011e-11	1.3944e-10	9.1964e-11	8.787e-11	3.8856e-11	6.0662e-11	8.2727e-11	5.8887e-11	8.9329e-11	5.0986e-11	4.00603e-10	6.6277e-11	6.6866e-11	5.9134e-11	5.3305e-11	5.023e-11	8.7607e-11	1.13844e-10	5.4767e-11	3.79682e-10	7.3286e-11	8.583e-11	5.5976e-11	3.4444e-11	3.4603e-11
2024-05-29T18:15:47.054	3.65835e-09	1.15513e-09	5.3007e-10	2.63012e-10	1.91695e-10	1.48113e-10	1.53745e-10	6.512e-11	1.15072e-10	1.01742e-10	1.00145e-10	8.9315e-11	9.8436e-11	5.2486e-11	5.0215e-11	9.0093e-11	4.96329e-10	6.8332e-11	9.8711e-11	5.6594e-11	1.10256e-10	6.6102e-11	5.5079e-11	3.3363e-11	1.01885e-10	1.34205e-10	1.06647e-10	4.5593e-11	7.1648e-11	6.0662e-11	6.3593e-11	7.1021e-11	6.6847e-11	3.6052e-11	7.2837e-11	8.2207e-11	6.4243e-11	2.6445e-11	6.2506e-11	7.3529e-11	6.3405e-11	5.0913e-11	4.7429e-11	7.2877e-11	3.9173e-11	7.0996e-11	6.5638e-11	6.8888e-11	1.9978e-11
2024-05-29T18:15:50.511	4.29508e-09	1.46377e-09	4.03914e-10	2.59843e-10	1.55428e-10	1.27077e-10	5.10741e-10	9.0644e-11	7.9788e-11	1.01742e-10	8.6728e-11	1.13855e-10	8.9166e-11	6.5249e-11	7.6154e-11	4.44798e-10	6.3877e-11	5.3418e-11	1.2144e-10	1.0461e-10	8.218e-11	6.1833e-11	6.6428e-11	8.5059e-11	9.9093e-11	1.04238e-10	1.10673e-10	5.9696e-11	6.0196e-11	7.2203e-11	5.2912e-11	7.9404e-11	4.3762e-11	4.7693e-11	1.13717e-10	6.6277e-11	4.5426e-11	5.6099e-11	7.299e-11	8.7001e-11	3.8235e-11	3.08491e-10	3.8726e-11	6.7471e-11	4.3797e-11	4.403e-11	6.8557e-11	7.7019e-11	7.2032e-11
2024-05-29T18:15:53.969	3.90077e-09	1.20943e-09	3.16709e-10	2.48434e-10	1.66013e-10	1.13123e-10	9.0336e-11	6.512e-11	9.7067e-11	1.10085e-10	9.5006e-11	1.08243e-10	9.969e-11	8.0693e-11	4.73458e-10	1.09185e-10	1.38298e-10	6.0264e-11	4.2935e-11	7.4867e-11	9.0024e-11	6.1833e-11	1.26474e-10	4.32431e-10	4.1028e-11	1.10884e-10	9.5082e-11	4.5593e-11	9.5178e-11	6.7822e-11	8.2727e-11	7.9404e-11	2.47555e-10	5.7004e-11	7.0524e-11	7.5791e-11	5.5636e-11	6.7423e-11	3.7692e-11	5.023e-11	5.4072e-11	5.4428e-11	5.4767e-11	1.9477e-11	5.1821e-11	5.5694e-11	7.405e-11	5.9659e-11	3.9956e-11
2024-05-29T18:15:57.427	3.21791e-09	1.1961e-09	4.45867e-10	2.65364e-10	1.54329e-10	3.9766e-10	1.5004e-10	1.02964e-10	1.26649e-10	1.04194e-10	6.1326e-11	8.7909e-11	9.191e-11	5.482e-11	8.6974e-11	8.5766e-11	1.1292e-10	7.0205e-11	6.885e-11	1.0837e-10	7.5319e-11	6.1833e-11	4.44681e-10	5.5326e-11	1.49814e-10	1.86773e-10	8.7077e-11	9.4387e-11	6.0196e-11	6.0662e-11	6.1098e-11	4.46713e-10	4.7268e-11	5.0986e-11	4.0717e-11	6.3677e-11	4.1468e-11	4.9475e-11	5.9597e-11	5.023e-11	8.1108e-11	6.666e-11	2.7383e-11	6.7471e-11	3.3925e-11	6.2268e-11	5.2361e-11	6.2886e-11	5.2857e-11
2024-05-29T18:16:00.886	4.5523e-09	1.09341e-09	5.32912e-10	2.65364e-10	5.61312e-10	1.14462e-10	1.55565e-10	7.636e-11	9.837e-11	7.2814e-11	8.8162e-11	1.05915e-10	9.4574e-11	4.476e-11	7.9396e-11	8.4274e-11	9.9728e-11	9.5285e-11	5.8511e-11	9.6653e-11	9.4418e-11	8.4264e-11	9.2463e-11	8.827e-11	1.05935e-10	1.3944e-10	1.19541e-10	7.7067e-11	6.0196e-11	8.579e-11	4.27322e-10	4.6976e-11	5.3597e-11	5.7004e-11	4.0717e-11	3.1839e-11	6.6866e-11	5.6099e-11	7.299e-11	5.3698e-11	5.7352e-11	5.4428e-11	5.123e-11	7.2877e-11	6.7849e-11	5.9072e-11	0	5.9659e-11	3.27054e-10
2024-05-29T18:16:04.344	3.48316e-09	1.21218e-09	6.30551e-10	2.89263e-10	1.99523e-10	1.52172e-10	9.188e-11	1.15118e-10	5.7536e-11	1.0659e-10	6.7179e-11	1.01098e-10	4.78876e-10	8.5221e-11	9.2591e-11	7.4701e-11	7.1417e-11	6.0264e-11	7.0736e-11	6.9314e-11	1.09024e-10	7.5729e-11	6.6428e-11	9.1368e-11	9.3259e-11	9.4149e-11	8.0099e-11	8.9543e-11	7.3725e-11	7.4296e-11	8.4586e-11	5.8887e-11	3.0944e-11	4.7693e-11	5.7583e-11	4.5026e-11	6.1508e-11	5.9134e-11	3.93971e-10	0	3.8235e-11	6.9382e-11	5.8089e-11	4.3553e-11	1.9586e-11	5.2097e-11	5.2361e-11	7.1701e-11	6.3176e-11
2024-05-29T18:16:07.804	3.44624e-09	7.99072e-10	3.67901e-10	2.79801e-10	1.29121e-10	1.37438e-10	1.56466e-10	1.73824e-10	8.2918e-11	7.7842e-11	7.427e-11	1.2531e-10	6.499e-11	8.223e-11	6.9216e-11	1.08017e-10	8.7468e-11	9.5285e-11	9.18e-11	6.9314e-11	8.052e-11	6.8136e-11	8.9431e-11	9.8688e-11	7.4907e-11	1.3098e-10	1.15823e-10	6.6741e-11	6.2654e-11	6.7822e-11	3.9439e-11	3.9702e-11	6.6847e-11	5.7004e-11	4.0717e-11	5.5146e-11	5.8645e-11	5.6099e-11	3.61041e-10	7.3529e-11	3.3112e-11	4.7136e-11	1.11232e-10	4.7709e-11	7.3286e-11	3.9382e-11	3.4278e-11	3.54066e-10	2.8253e-11
2024-05-29T18:16:11.261	4.23669e-09	1.05359e-09	5.79621e-10	2.18256e-10	2.00374e-10	1.32936e-10	9.9242e-11	1.44701e-10	8.5935e-11	8.2564e-11	8.2278e-11	1.39444e-10	7.722e-11	1.36134e-10	7.6154e-11	1.01978e-10	7.6586e-11	7.5544e-11	8.7391e-11	1.09595e-10	4.308e-10	6.4002e-11	8.3035e-11	8.9832e-11	8.5407e-11	1.34205e-10	1.45908e-10	1.00483e-10	9.5178e-11	6.5523e-11	6.8309e-11	3.9702e-11	7.3662e-11	4.4155e-11	6.3079e-11	7.5791e-11	4.9066e-11	6.4778e-11	4.2141e-11	8.2755e-11	4.6828e-11	6.0852e-11	8.8732e-11	3.3736e-11	5.5399e-11	4.403e-11	6.5638e-11	7.1701e-11	4.8936e-11
2024-05-29T18:16:14.719	4.07137e-09	6.85714e-10	4.87927e-10	2.41672e-10	1.67035e-10	2.28258e-10	1.3628e-10	9.4929e-11	1.11703e-10	8.102e-11	5.09166e-10	6.3156e-11	1.26099e-10	4.187e-11	7.6154e-11	1.00727e-10	1.10639e-10	7.3808e-11	6.885e-11	9.3851e-11	9.5838e-11	8.7445e-11	4.0678e-11	1.00088e-10	6.2672e-11	1.29885e-10	1.02463e-10	8.0828e-11	6.0196e-11	7.6332e-11	6.5993e-11	4.6976e-11	4.7268e-11	6.2444e-11	4.0717e-11	6.3677e-11	3.96018e-10	6.7423e-11	8.2149e-11	3.797e-11	6.6225e-11	3.8486e-11	5.4767e-11	6.1593e-11	4.3797e-11	3.6627e-10	3.9581e-11	7.1701e-11	1.9978e-11
2024-05-29T18:16:18.180	4.60377e-09	1.01155e-09	6.5913e-10	2.98426e-10	2.06231e-10	1.6093e-10	1.45275e-10	1.0799e-10	4.89251e-10	1.11226e-10	1.00145e-10	1.02324e-10	7.3932e-11	7.252e-11	7.1014e-11	1.03214e-10	1.00999e-10	8.2125e-11	6.072e-11	5.1663e-11	9.1512e-11	6.1833e-11	3.3214e-11	4.7182e-11	9.7667e-11	1.51244e-10	8.8736e-11	8.9543e-11	7.5745e-11	3.0331e-11	4.3203e-11	5.3266e-11	0	6.9814e-11	4.03901e-10	7.3528e-11	8.4985e-11	5.9134e-11	6.2506e-11	6.0037e-11	6.8929e-11	7.2001e-11	6.7075e-11	2.91509e-10	6.1938e-11	4.8232e-11	6.5638e-11	7.1701e-11	3.4603e-11
2024-05-29T18:16:21.637	3.64549e-09	1.17013e-09	6.38644e-10	1.77429e-10	1.3173e-10	1.32936e-10	9.4893e-11	4.52048e-10	1.34461e-10	1.25108e-10	8.8162e-11	9.3408e-11	6.8707e-11	5.0044e-11	8.9827e-11	3.1853e-11	7.4903e-11	8.0531e-11	4.8684e-11	7.4867e-11	9.1512e-11	7.5729e-11	6.4318e-11	8.6679e-11	9.02e-11	1.48381e-10	1.20754e-10	7.1052e-11	9.9824e-11	6.0662e-11	4.3203e-11	6.4017e-11	6.9193e-11	6.2444e-11	6.8133e-11	8.4237e-11	3.709e-11	5.9134e-11	6.7951e-11	5.3698e-11	6.8929e-11	3.8486e-11	3.35377e-10	4.3553e-11	6.7849e-11	4.8232e-11	1.9791e-11	2.8123e-11	8.2371e-11
2024-05-29T18:16:25.094	3.11154e-09	1.13711e-09	4.51255e-10	2.3822e-10	1.19543e-10	1.27077e-10	1.41348e-10	1.21829e-10	1.2153e-10	9.5337e-11	1.03833e-10	1.12755e-10	7.0492e-11	6.7141e-11	8.8412e-11	4.90621e-10	9.9728e-11	1.09237e-10	4.59e-11	6.7361e-11	6.7768e-11	6.1833e-11	4.0678e-11	6.8779e-11	4.30635e-10	1.52186e-10	9.5082e-11	8.6163e-11	7.7713e-11	7.6332e-11	9.6604e-11	7.3207e-11	4.7268e-11	7.2105e-11	6.0393e-11	3.6764e-11	6.1508e-11	9.7167e-11	3.7692e-11	3.2883e-11	7.1531e-11	4.3029e-11	5.123e-11	6.4599e-11	5.1821e-11	6.8211e-11	0	5.6247e-11	6.3176e-11
2024-05-29T18:16:28.552	3.9488e-09	9.48859e-10	4.31402e-10	2.47599e-10	1.90806e-10	1.15786e-10	9.7814e-11	1.85622e-10	1.26649e-10	6.7413e-11	6.3337e-11	1.04732e-10	9.969e-11	1.06159e-10	4.77171e-10	1.14846e-10	8.7468e-11	5.8071e-11	6.691e-11	6.1129e-11	9.0024e-11	5.9583e-11	4.9821e-11	9.1368e-11	9.3259e-11	1.37374e-10	8.5386e-11	9.2801e-11	6.5019e-11	8.0249e-11	6.5993e-11	7.5329e-11	4.7268e-11	6.9814e-11	4.4603e-11	6.3677e-11	6.4243e-11	4.5805e-11	5.3305e-11	3.797e-11	4.12688e-10	5.7729e-11	5.4767e-11	7.0226e-11	6.4961e-11	2.7847e-11	9.4913e-11	9.5371e-11	8.7082e-11
2024-05-29T18:16:32.011	4.30135e-09	1.25868e-09	3.92478e-10	2.81277e-10	5.00085e-10	1.20934e-10	1.17425e-10	1.23985e-10	1.02179e-10	1.23078e-10	8.8162e-11	7.8944e-11	9.5879e-11	7.5895e-11	8.2511e-11	7.638e-11	1.3456e-10	9.797e-11	4.59e-11	8.0037e-11	1.4043e-10	4.9576e-11	7.9644e-11	7.6444e-11	1.14831e-10	1.32066e-10	1.02463e-10	4.2211e-11	5.4951e-11	5.5377e-11	4.14012e-10	7.3207e-11	9.4537e-11	2.5493e-11	5.1504e-11	4.1103e-11	5.5636e-11	7.4799e-11	6.5285e-11	4.2452e-11	4.6828e-11	4.3029e-11	8.8732e-11	5.509e-11	7.062e-11	1.9691e-11	3.4278e-11	6.8888e-11	9.1551e-11
2024-05-29T18:16:35.473	4.09938e-09	9.03426e-10	5.03769e-10	2.71536e-10	1.58678e-10	1.2827e-10	1.07412e-10	1.35233e-10	1.04641e-10	8.8469e-11	8.9572e-11	4.46019e-10	1.13664e-10	5.7059e-11	7.2768e-11	8.7232e-11	1.1735e-10	5.8071e-11	7.0736e-11	1.00711e-10	7.8825e-11	6.4002e-11	6.8472e-11	9.8688e-11	8.0329e-11	1.62191e-10	9.1964e-11	3.8533e-11	6.5019e-11	7.0047e-11	5.8497e-11	5.3266e-11	6.1889e-11	4.4155e-11	5.1504e-11	6.3677e-11	6.1508e-11	3.66439e-10	1.8846e-11	3.797e-11	8.7607e-11	3.333e-11	3.8726e-11	7.0226e-11	6.4961e-11	3.9382e-11	3.10396e-10	4.8711e-11	5.2857e-11
2024-05-29T18:16:38.928	4.76616e-09	7.07762e-10	3.9407e-10	2.89263e-10	2.05405e-10	1.58065e-10	1.10001e-10	8.3013e-11	1.11703e-10	8.703e-11	6.1326e-11	1.07086e-10	1.26099e-10	6.898e-11	4.7638e-11	1.12616e-10	6.7752e-11	3.6014e-11	3.975e-11	6.1129e-11	9.2976e-11	8.2627e-11	4.0678e-11	8.0001e-11	8.2057e-11	1.40462e-10	1.14558e-10	4.50033e-10	4.915e-11	8.0249e-11	4.9886e-11	7.5329e-11	3.9949e-11	7.6479e-11	6.0393e-11	8.6219e-11	3.709e-11	3.7399e-11	4.6164e-11	5.3698e-11	3.3112e-11	3.333e-11	7.245e-11	6.7471e-11	7.8346e-11	3.41623e-10	2.7988e-11	6.2886e-11	3.4603e-11
2024-05-29T18:16:42.395	4.08787e-09	1.07803e-09	4.51924e-10	3.50158e-10	2.07875e-10	1.2827e-10	1.3833e-10	1.13961e-10	1.00925e-10	4.80113e-10	8.3787e-11	1.51442e-10	7.3932e-11	9.4951e-11	6.3517e-11	9.0093e-11	9.5816e-11	7.0205e-11	8.114e-11	7.4867e-11	7.5319e-11	4.0479e-11	4.6971e-11	6.8779e-11	8.8631e-11	9.5655e-11	1.34461e-10	6.2133e-11	9.0294e-11	8.579e-11	5.5775e-11	4.3491e-11	5.3597e-11	7.4324e-11	4.4603e-11	3.82062e-10	6.6866e-11	6.4778e-11	7.0516e-11	4.6504e-11	6.0454e-11	4.7136e-11	3.8726e-11	3.3736e-11	3.63275e-10	5.9072e-11	5.5976e-11	6.8888e-11	7.4751e-11
2024-05-29T18:16:45.852	4.53748e-09	8.68752e-10	6.08111e-10	2.77571e-10	2.07055e-10	1.68333e-10	1.03408e-10	1.43782e-10	5.20033e-10	5.9453e-11	9.8885e-11	7.8944e-11	9.3252e-11	1.14117e-10	5.9415e-11	4.7779e-11	8.2979e-11	8.2125e-11	7.2574e-11	7.8351e-11	8.052e-11	5.2258e-11	3.7134e-11	8.3407e-11	9.02e-11	1.02857e-10	1.19541e-10	5.9696e-11	4.915e-11	4.6332e-11	3.9439e-11	7.3207e-11	9.4537e-11	8.0615e-11	3.65548e-10	4.1103e-11	1.8545e-11	5.9134e-11	6.2506e-11	5.6956e-11	5.4072e-11	1.9243e-11	6.1231e-11	3.54358e-10	3.3925e-11	6.5307e-11	3.9581e-11	6.2886e-11	5.9934e-11
2024-05-29T18:16:49.304	4.72359e-09	1.06243e-09	5.89442e-10	2.32945e-10	1.44064e-10	1.15786e-10	1.3628e-10	5.33531e-10	8.5935e-11	9.5337e-11	8.074e-11	8.2042e-11	6.8707e-11	6.898e-11	5.0215e-11	7.8023e-11	1.15156e-10	6.8332e-11	9.7368e-11	1.22258e-10	9.1512e-11	4.3722e-11	7.4268e-11	6.6726e-11	9.3259e-11	1.17153e-10	1.15823e-10	8.787e-11	7.3725e-11	7.4296e-11	3.5275e-11	5.3266e-11	8.1871e-11	3.63217e-10	4.0717e-11	7.3528e-11	5.5636e-11	6.9968e-11	3.2643e-11	7.1036e-11	7.4041e-11	7.6973e-11	3.64827e-10	1.9477e-11	6.4961e-11	5.5694e-11	3.9581e-11	8.1993e-11	6.626e-11
2024-05-29T18:16:52.761	4.08293e-09	1.1534e-09	5.2434e-10	2.01479e-10	2.07875e-10	1.59026e-10	1.44304e-10	1.19634e-10	9.3048e-11	9.7949e-11	8.8162e-11	7.4056e-11	9.191e-11	8.3739e-11	8.5512e-11	4.18956e-10	6.9609e-11	1.00583e-10	4.8684e-11	9.5263e-11	9.0024e-11	7.9253e-11	9.2463e-11	5.0044e-11	4.66895e-10	1.17153e-10	1.02463e-10	5.9696e-11	9.9824e-11	4.6332e-11	8.4586e-11	2.511e-11	3.5731e-11	4.0308e-11	0	6.6277e-11	5.5636e-11	6.7423e-11	4.2141e-11	8.7001e-11	1.9117e-11	9.6216e-11	4.3297e-11	4.7709e-11	5.5399e-11	4.403e-11	4.4253e-11	5.6247e-11	5.6506e-11
2024-05-29T18:16:56.220	3.52543e-09	9.72497e-10	5.86358e-10	2.79801e-10	1.16662e-10	1.30624e-10	9.188e-11	1.27149e-10	1.24631e-10	7.4528e-11	8.074e-11	1.01098e-10	6.499e-11	8.223e-11	7.448e-11	4.41363e-10	1.28749e-10	5.5793e-11	7.2574e-11	7.3063e-11	7.8825e-11	7.0112e-11	7.9644e-11	8.6679e-11	4.42524e-10	8.7865e-11	8.3661e-11	2.4371e-11	5.7633e-11	7.0047e-11	6.1098e-11	7.3207e-11	6.6847e-11	5.0986e-11	6.0393e-11	4.1103e-11	4.1468e-11	5.6099e-11	4.2141e-11	5.023e-11	3.3112e-11	5.7729e-11	5.8089e-11	3.3736e-11	4.3797e-11	5.5694e-11	4.8477e-11	6.8888e-11	7.2032e-11
2024-05-29T18:16:59.678	3.69654e-09	9.77293e-10	5.20871e-10	2.2295e-10	1.77886e-10	1.57098e-10	3.63285e-10	9.9028e-11	1.3159e-10	8.4079e-11	1.00145e-10	6.5099e-11	9.4574e-11	5.9212e-11	7.9396e-11	4.5215e-10	1.39217e-10	3.6014e-11	8.114e-11	6.535e-11	8.5404e-11	4.6741e-11	4.6971e-11	5.5326e-11	3.8488e-10	1.29885e-10	8.19e-11	4.5593e-11	5.2131e-11	6.5523e-11	8.2727e-11	1.0353e-10	6.6847e-11	5.0986e-11	6.3079e-11	6.3677e-11	6.939e-11	4.5805e-11	6.5285e-11	4.6504e-11	6.0454e-11	7.6973e-11	5.4767e-11	6.1593e-11	4.7977e-11	5.9072e-11	5.2361e-11	2.8123e-11	6.9206e-11
2024-05-29T18:17:03.136	4.38506e-09	8.92267e-10	4.31402e-10	3.44793e-10	1.18111e-10	1.11769e-10	1.40349e-10	1.00357e-10	1.05851e-10	8.5567e-11	8.527e-11	6.8822e-11	9.7166e-11	6.7141e-11	6.3517e-11	9.5558e-11	8.7468e-11	2.7897e-11	8.7391e-11	8.6449e-11	1.09024e-10	6.6102e-11	6.8472e-11	9.1368e-11	6.6999e-11	1.33141e-10	1.23146e-10	9.5947e-11	8.513e-11	6.0662e-11	6.5993e-11	4.3491e-11	8.3798e-11	8.2606e-11	5.1504e-11	4.5026e-11	6.1508e-11	5.9134e-11	6.2506e-11	7.3529e-11	3.74623e-10	6.0852e-11	7.4992e-11	4.3553e-11	5.5399e-11	7.8763e-11	7.405e-11	3.9773e-11	3.9956e-11
2024-05-29T18:17:06.595	4.10103e-09	8.00742e-10	4.57901e-10	2.52568e-10	1.89014e-10	7.197e-11	1.63502e-10	1.01669e-10	1.36342e-10	7.2814e-11	5.9247e-11	1.22299e-10	6.8707e-11	4.88788e-10	7.2768e-11	1.04436e-10	9.3116e-11	6.0264e-11	5.3822e-11	8.4892e-11	1.13872e-10	6.4002e-11	2.3368e-10	7.8243e-11	1.05935e-10	1.14687e-10	8.0099e-11	5.9696e-11	8.1506e-11	7.8315e-11	3.5275e-11	4.3491e-11	7.5798e-11	6.7448e-11	9.2849e-11	5.5146e-11	5.2454e-11	5.6099e-11	6.5285e-11	1.31534e-10	5.7352e-11	8.3879e-11	5.123e-11	5.8432e-11	7.062e-11	5.5694e-11	4.4253e-11	6.5955e-11	2.8253e-11
2024-05-29T18:17:10.053	3.76016e-09	8.80209e-10	4.53925e-10	2.79059e-10	1.38036e-10	1.37438e-10	9.6365e-11	1.6034e-10	9.837e-11	6.926e-11	6.3337e-11	1.19203e-10	4.51642e-10	6.7141e-11	1.33801e-10	1.15945e-10	7.6586e-11	7.5544e-11	7.2574e-11	8.3305e-11	9.4418e-11	4.53172e-10	8.4679e-11	9.1368e-11	6.9061e-11	1.21937e-10	1.19541e-10	5.9696e-11	4.5975e-11	5.2535e-11	3.5275e-11	5.0219e-11	5.0532e-11	9.1916e-11	6.0393e-11	8.2207e-11	2.6227e-11	4.5805e-11	6.7951e-11	6.5767e-11	6.3405e-11	6.3822e-11	5.4767e-11	5.8432e-11	3.9173e-11	3.9382e-11	7.1356e-11	6.2886e-11	5.9934e-11
2024-05-29T18:17:13.520	3.68569e-09	1.07369e-09	6.81664e-10	2.79801e-10	1.41685e-10	1.32936e-10	1.29937e-10	1.12792e-10	1.094e-10	1.00494e-10	6.902e-11	3.15778e-10	9.7166e-11	8.223e-11	8.0969e-11	1.17034e-10	7.1417e-11	9.797e-11	9.18e-11	1.26548e-10	4.68932e-10	4.6741e-11	1.17429e-10	5.5326e-11	9.7667e-11	1.3633e-10	1.02463e-10	3.8533e-11	6.5019e-11	7.2203e-11	4.9886e-11	8.3279e-11	4.7268e-11	7.2105e-11	3.6418e-11	6.6277e-11	5.2454e-11	4.1814e-11	5.9597e-11	8.4905e-11	8.1108e-11	4.3029e-11	6.1231e-11	4.7709e-11	5.5399e-11	4.8232e-11	5.2361e-11	6.5955e-11	6.3176e-11
2024-05-29T18:17:16.972	3.57849e-09	1.26977e-09	4.43148e-10	2.84935e-10	1.4048e-10	1.18388e-10	1.03408e-10	8.6146e-11	9.5746e-11	1.04194e-10	9.2329e-11	7.7349e-11	1.05738e-10	8.223e-11	5.0215e-11	1.05643e-10	9.4476e-11	5.5793e-11	5.3822e-11	8.3305e-11	9.4418e-11	3.6952e-11	7.4268e-11	5.7786e-11	1.25344e-10	1.20759e-10	1.10673e-10	3.92965e-10	8.1506e-11	9.0994e-11	6.1098e-11	6.6434e-11	3.5731e-11	7.6479e-11	5.4628e-11	5.5146e-11	1.06534e-10	8.3628e-11	3.2643e-11	5.6956e-11	6.8929e-11	3.8486e-11	4.7429e-11	5.1532e-11	5.8759e-11	1.80469e-10	3.4278e-11	5.6247e-11	6.626e-11
2024-05-29T18:17:20.429	4.53154e-09	1.52281e-09	5.32345e-10	2.23877e-10	2.2965e-10	1.39643e-10	1.35244e-10	9.6314e-11	1.18345e-10	8.703e-11	8.8162e-11	9.7329e-11	7.8812e-11	1.03773e-10	6.9216e-11	1.15945e-10	1.19503e-10	5.5793e-11	3.6287e-11	8.9484e-11	9.5838e-11	9.0514e-11	6.2137e-11	8.9832e-11	4.4316e-11	1.53123e-10	1.26648e-10	4.54955e-10	7.3725e-11	6.3139e-11	5.5775e-11	7.5329e-11	5.3597e-11	5.9786e-11	6.5654e-11	3.6764e-11	1.31135e-10	6.9968e-11	3.7692e-11	3.797e-11	6.8929e-11	4.7136e-11	2.7383e-11	7.0226e-11	5.5399e-11	3.60401e-10	2.7988e-11	4.8711e-11	3.9956e-11
2024-05-29T18:17:23.887	4.44908e-09	1.36165e-09	5.37991e-10	3.01189e-10	1.69059e-10	1.14462e-10	1.06094e-10	8.917e-11	1.24631e-10	1.27115e-10	9.7609e-11	5.9077e-11	8.6334e-11	7.0772e-11	5.9415e-11	1.14846e-10	5.5319e-11	3.9452e-11	5.1318e-11	8.0037e-11	5.9261e-11	5.4809e-11	5.7528e-11	6.0146e-11	6.4871e-11	1.38411e-10	4.80899e-10	3.4465e-11	8.6885e-11	5.808e-11	4.6664e-11	3.9702e-11	5.6496e-11	6.2444e-11	9.6354e-11	8.8157e-11	7.1825e-11	2.6445e-11	6.2506e-11	6.8452e-11	5.4072e-11	5.7729e-11	3.3538e-11	7.5435e-11	5.5399e-11	4.403e-11	3.9581e-11	5.9659e-11	7.2032e-11
2024-05-29T18:17:27.344	5.03008e-09	1.09707e-09	5.90466e-10	2.11509e-10	1.30432e-10	1.85553e-10	7.8682e-11	5.43375e-10	1.19416e-10	7.6203e-11	7.0813e-11	6.3156e-11	7.3932e-11	6.3301e-11	1.07698e-10	5.9591e-11	8.4502e-11	7.3808e-11	6.285e-11	9.5263e-11	1.09024e-10	6.1833e-11	6.2137e-11	9.4364e-11	8.3749e-11	1.61307e-10	9.1964e-11	5.7154e-11	3.0098e-11	5.5377e-11	5.8497e-11	6.4017e-11	5.0532e-11	5.7004e-11	4.8177e-11	5.8129e-11	6.1508e-11	8.9681e-11	7.0516e-11	2.6849e-11	4.2748e-11	3.333e-11	3.28601e-10	4.3553e-11	8.3098e-11	4.403e-11	4.8477e-11	5.2614e-11	3.9956e-11
2024-05-29T18:17:30.803	4.07302e-09	1.02922e-09	5.93019e-10	2.75323e-10	1.73038e-10	1.10397e-10	3.71708e-10	1.72292e-10	1.40028e-10	6.1539e-11	7.427e-11	8.0508e-11	1.23106e-10	7.252e-11	8.8412e-11	4.51308e-10	1.36442e-10	6.6407e-11	8.114e-11	9.6653e-11	9.7237e-11	6.6102e-11	6.2137e-11	4.4135e-11	4.64183e-10	1.32066e-10	1.26648e-10	6.4479e-11	6.9508e-11	7.6332e-11	5.8497e-11	7.7393e-11	4.7268e-11	5.0986e-11	7.9372e-11	6.8779e-11	4.5426e-11	4.1814e-11	5.3305e-11	6.8452e-11	5.058e-11	5.0913e-11	3.3538e-11	3.8955e-11	5.5399e-11	2.7847e-11	5.5976e-11	5.2614e-11	7.2032e-11
2024-05-29T18:17:34.261	4.20638e-09	8.88516e-10	3.92478e-10	3.1266e-10	1.83534e-10	1.19668e-10	1.08714e-10	1.23985e-10	1.18345e-10	9.1278e-11	7.427e-11	1.09389e-10	9.0548e-11	7.4227e-11	4.26381e-10	7.4701e-11	1.50654e-10	4.5555e-11	3.6287e-11	7.8351e-11	6.1498e-11	5.9583e-11	4.3938e-11	4.57447e-10	5.8023e-11	1.32066e-10	1.09348e-10	6.2133e-11	5.7633e-11	5.5377e-11	4.6664e-11	6.1506e-11	8.1871e-11	5.9786e-11	8.1434e-11	1.03984e-10	2.6227e-11	6.7423e-11	7.0516e-11	8.7001e-11	6.8929e-11	7.4528e-11	3.8726e-11	7.0226e-11	5.1821e-11	4.403e-11	5.5976e-11	8.6682e-11	6.626e-11
2024-05-29T18:17:37.721	4.23828e-09	1.22534e-09	4.31402e-10	2.55827e-10	1.82605e-10	1.8473e-10	1.22124e-10	1.33258e-10	1.16173e-10	9.1278e-11	1.00145e-10	9.604e-11	8.4883e-11	6.7141e-11	4.50255e-10	9.2866e-11	1.3456e-10	6.2378e-11	7.4366e-11	5.4185e-11	1.06518e-10	6.1833e-11	8.4679e-11	4.34357e-10	9.4751e-11	1.09587e-10	9.5082e-11	6.6741e-11	8.513e-11	4.6332e-11	7.055e-11	6.6434e-11	8.5681e-11	5.0986e-11	4.8177e-11	8.2207e-11	7.4181e-11	5.6099e-11	7.9958e-11	4.6504e-11	6.0454e-11	1.9243e-11	8.215e-11	7.5435e-11	6.7849e-11	5.5694e-11	4.8477e-11	9.113e-11	2.8253e-11
2024-05-29T18:17:41.178	3.6103e-09	1.04276e-09	4.92856e-10	3.01189e-10	1.36798e-10	1.11769e-10	1.26648e-10	1.00357e-10	1.05851e-10	1.24098e-10	1.07394e-10	8.6479e-11	9.3252e-11	4.8519e-10	7.1014e-11	1.17034e-10	7.3181e-11	5.5793e-11	5.1318e-11	1.07132e-10	6.5744e-11	6.6102e-11	4.46229e-10	8.9832e-11	1.13602e-10	1.25405e-10	1.13278e-10	4.8741e-11	7.1648e-11	4.9531e-11	4.9886e-11	5.6147e-11	6.4416e-11	7.2105e-11	6.5654e-11	8.0125e-11	3.709e-11	6.202e-11	6.5285e-11	1.05705e-10	2.7036e-11	5.0913e-11	5.4767e-11	1.9477e-11	4.3797e-11	6.8211e-11	8.6265e-11	3.4444e-11	5.6506e-11
2024-05-29T18:17:44.642	3.57849e-09	9.64913e-10	4.17161e-10	2.4592e-10	1.63951e-10	1.49138e-10	1.02038e-10	9.3522e-11	8.1368e-11	7.2814e-11	9.8885e-11	8.3547e-11	4.12241e-10	6.7141e-11	8.2511e-11	1.06837e-10	1.26742e-10	5.8071e-11	5.3822e-11	6.7361e-11	8.052e-11	4.61236e-10	6.4318e-11	9.5827e-11	1.08551e-10	1.47415e-10	1.38736e-10	8.6163e-11	3.8856e-11	5.2535e-11	2.93016e-10	5.0219e-11	5.0532e-11	3.6052e-11	5.7583e-11	7.1193e-11	7.4181e-11	3.2389e-11	7.0516e-11	7.5941e-11	7.8823e-11	2.7214e-11	5.4767e-11	4.3553e-11	3.3925e-11	3.9382e-11	4.8477e-11	1.14238e-10	4.8936e-11
2024-05-29T18:17:48.095	2.99467e-09	1.05232e-09	5.01365e-10	4.73387e-10	1.64985e-10	3.9031e-11	1.11272e-10	1.11611e-10	9.3048e-11	8.8469e-11	9.3677e-11	1.32099e-10	6.499e-11	9.4951e-11	8.2511e-11	1.10341e-10	1.32651e-10	7.8904e-11	5.6216e-11	6.9314e-11	9.2976e-11	6.1833e-11	8.1357e-11	9.7268e-11	8.8631e-11	7.9313e-11	9.0364e-11	8.2645e-11	9.6752e-11	4.10686e-10	5.2912e-11	9.8857e-11	1.01064e-10	5.9786e-11	4.0717e-11	4.8634e-11	3.709e-11	1.87e-11	7.299e-11	4.6504e-11	3.3112e-11	5.4428e-11	6.9814e-11	6.7471e-11	7.8346e-11	5.9072e-11	3.9581e-11	2.70483e-10	5.2857e-11
2024-05-29T18:17:51.554	4.12395e-09	9.7181e-10	5.89442e-10	2.26636e-10	1.6291e-10	1.18388e-10	1.08714e-10	1.34249e-10	1.20477e-10	1.22049e-10	1.14183e-10	4.42653e-10	1.06906e-10	9.8828e-11	8.8412e-11	1.14846e-10	6.1848e-11	6.8332e-11	9.4625e-11	8.6449e-11	8.8511e-11	1.03202e-10	2.8764e-11	6.6726e-11	1.2194e-10	1.02857e-10	1.09348e-10	5.1698e-11	8.3338e-11	5.5377e-11	5.8497e-11	4.6976e-11	7.7875e-11	4.7693e-11	4.0717e-11	6.0966e-11	3.709e-11	3.82317e-10	7.5385e-11	6.5767e-11	5.058e-11	6.9382e-11	4.3297e-11	7.0226e-11	8.5375e-11	5.9072e-11	3.7498e-10	2.8123e-11	5.6506e-11
2024-05-29T18:17:55.018	4.30917e-09	7.85584e-10	5.20871e-10	2.81277e-10	1.74993e-10	1.62812e-10	1.5004e-10	1.01669e-10	9.3048e-11	8.2564e-11	1.0622e-10	1.05915e-10	9.0548e-11	7.0772e-11	3.1759e-11	6.757e-11	7.8233e-11	4.8318e-11	3.6287e-11	9.8024e-11	9.7237e-11	5.2258e-11	4.3938e-11	5.7786e-11	8.2057e-11	1.10884e-10	9.1964e-11	3.8993e-10	7.5745e-11	6.7822e-11	7.2721e-11	8.8776e-11	7.3662e-11	5.4078e-11	0	6.8779e-11	4.02905e-10	1.87e-11	4.2141e-11	3.2883e-11	6.6225e-11	5.7729e-11	6.422e-11	9.1357e-11	6.1938e-11	3.39345e-10	4.8477e-11	6.5955e-11	5.2857e-11
2024-05-29T18:17:58.474	3.56907e-09	1.07865e-09	4.73472e-10	2.67695e-10	1.9781e-10	1.07602e-10	1.60023e-10	1.23985e-10	1.36342e-10	8.5567e-11	6.3337e-11	9.7329e-11	7.722e-11	7.7527e-11	6.9216e-11	7.638e-11	1.00999e-10	1.05615e-10	3.975e-11	9.2418e-11	9.1512e-11	5.7246e-11	7.2388e-11	8.5059e-11	9.1742e-11	8.4548e-11	4.61085e-10	5.9696e-11	1.0712e-10	4.6332e-11	5.5775e-11	6.1506e-11	5.3597e-11	7.2105e-11	6.0393e-11	4.1103e-11	5.8645e-11	3.2389e-11	4.2141e-11	4.6504e-11	5.058e-11	3.333e-11	8.4401e-11	5.509e-11	3.3925e-11	9.4434e-11	2.7988e-11	3.4444e-11	4.4672e-11
2024-05-29T18:18:01.928	4.17425e-09	8.17253e-10	5.2434e-10	2.11509e-10	1.67035e-10	1.38536e-10	1.07412e-10	1.16263e-10	1.12838e-10	5.2699e-11	1.0622e-10	1.23313e-10	1.2998e-10	8.9521e-11	7.7792e-11	5.9591e-11	1.0948e-10	4.97465e-10	6.072e-11	1.14362e-10	1.1622e-10	8.4264e-11	6.8472e-11	9.7268e-11	7.4907e-11	1.08274e-10	4.66743e-10	4.8741e-11	1.05701e-10	3.0331e-11	6.1098e-11	8.5151e-11	4.7268e-11	4.4155e-11	3.6418e-11	5.1992e-11	5.8645e-11	5.9134e-11	4.6164e-11	4.2452e-11	2.7036e-11	4.7136e-11	5.123e-11	3.3736e-11	3.9173e-11	5.5694e-11	5.9372e-11	9.5371e-11	8.7082e-11
2024-05-29T18:18:05.415	4.17425e-09	1.01484e-09	5.80663e-10	2.2572e-10	1.77886e-10	1.07602e-10	1.17425e-10	1.00357e-10	7.4848e-11	1.23078e-10	7.0813e-11	1.10522e-10	8.3407e-11	1.35211e-10	5.7254e-11	6.5666e-11	8.5997e-11	8.0531e-11	5.6216e-11	9.5263e-11	7.7092e-11	5.4809e-11	8.1357e-11	1.00088e-10	8.8631e-11	3.97286e-10	1.08006e-10	6.8931e-11	7.9632e-11	7.2203e-11	6.1098e-11	5.8887e-11	8.9329e-11	8.645e-11	7.9372e-11	5.5146e-11	5.2454e-11	5.2891e-11	6.5285e-11	6.2967e-11	8.3331e-11	8.3879e-11	4.3297e-11	0	7.3286e-11	5.2097e-11	3.4278e-11	5.6247e-11	1.9978e-11
2024-05-29T18:18:08.855	5.62888e-09	1.13711e-09	4.09116e-10	2.51746e-10	1.12202e-10	1.15786e-10	1.02038e-10	4.72965e-10	7.1365e-11	8.5567e-11	7.0813e-11	1.19203e-10	9.5879e-11	5.2486e-11	3.8896e-11	8.2756e-11	7.1417e-11	8.0531e-11	5.3822e-11	8.4892e-11	1.1268e-10	8.4264e-11	9.9641e-11	7.4601e-11	1.20784e-10	1.10884e-10	1.36618e-10	8.6163e-11	1.02804e-10	3.5023e-11	4.9886e-11	8.1365e-11	6.1889e-11	5.9786e-11	3.1539e-11	5.8129e-11	4.5426e-11	5.9134e-11	3.7692e-11	9.105e-11	8.3331e-11	7.2001e-11	3.62765e-10	5.509e-11	6.1938e-11	7.3676e-11	5.2361e-11	5.9659e-11	8.9344e-11
2024-05-29T18:18:12.308	3.77624e-09	1.0662e-09	6.95702e-10	1.77429e-10	1.13708e-10	1.22187e-10	2.4135e-10	1.15118e-10	1.38197e-10	9.1278e-11	8.6728e-11	4.7367e-11	1.14752e-10	7.0772e-11	6.737e-11	4.69488e-10	1.37373e-10	8.0531e-11	4.2935e-11	6.535e-11	6.9732e-11	5.4809e-11	6.8472e-11	7.2713e-11	4.70785e-10	1.45462e-10	1.21956e-10	5.9696e-11	7.1648e-11	5.808e-11	3.9439e-11	5.0219e-11	6.6847e-11	5.0986e-11	9.4618e-11	9.0053e-11	3.709e-11	6.202e-11	5.3305e-11	3.797e-11	8.1108e-11	6.3822e-11	2.7383e-11	8.9256e-11	6.7849e-11	5.5694e-11	0	1.9886e-11	5.6506e-11
2024-05-29T18:18:15.762	3.9726e-09	1.16541e-09	5.59464e-10	2.70772e-10	2.22883e-10	1.61874e-10	5.08256e-10	1.29209e-10	1.46254e-10	1.11226e-10	1.03833e-10	5.4694e-11	9.7166e-11	5.0044e-11	5.9415e-11	1.14846e-10	8.7468e-11	7.3808e-11	9.7368e-11	7.8351e-11	9.8616e-11	7.5729e-11	6.6428e-11	7.4601e-11	1.01885e-10	1.49342e-10	7.0411e-11	7.1052e-11	6.5019e-11	5.5377e-11	0	5.3266e-11	4.3762e-11	5.4078e-11	1.8209e-11	5.8129e-11	4.9066e-11	5.2891e-11	4.6164e-11	4.6504e-11	3.8235e-11	3.61034e-10	4.3297e-11	4.3553e-11	6.4961e-11	3.9382e-11	3.4278e-11	9.5371e-11	3.4603e-11
2024-05-29T18:18:19.246	5.08201e-09	6.31986e-10	4.67693e-10	2.60639e-10	1.74018e-10	1.13123e-10	8.7165e-11	1.28185e-10	1.43619e-10	8.9884e-11	9.8885e-11	1.03535e-10	1.14752e-10	6.7141e-11	4.9936e-10	7.4701e-11	9.4476e-11	8.0531e-11	6.4912e-11	1.13189e-10	1.01319e-10	8.7445e-11	6.8472e-11	4.65288e-10	5.5553e-11	1.02857e-10	1.15823e-10	4.8741e-11	8.3338e-11	7.2203e-11	8.6406e-11	2.511e-11	8.3798e-11	4.7693e-11	8.3445e-11	5.5146e-11	5.2454e-11	3.2389e-11	5.6539e-11	5.3698e-11	7.4041e-11	4.7136e-11	5.4767e-11	7.7909e-11	2.7699e-11	3.9382e-11	5.9372e-11	7.4408e-11	5.2857e-11
2024-05-29T18:18:22.685	4.04981e-09	1.13946e-09	6.89157e-10	2.47599e-10	4.72445e-10	1.18388e-10	9.9242e-11	6.512e-11	1.094e-10	1.04194e-10	9.2329e-11	7.5721e-11	9.3252e-11	8.3739e-11	9.2591e-11	1.00727e-10	1.04718e-10	5.3418e-11	7.2574e-11	9.5263e-11	7.3504e-11	3.18732e-10	8.3035e-11	1.21442e-10	1.01885e-10	1.09587e-10	1.09348e-10	5.7154e-11	7.7713e-11	4.9531e-11	4.42346e-10	4.6976e-11	9.7855e-11	5.0986e-11	6.5654e-11	8.4237e-11	2.6227e-11	1.04116e-10	3.7692e-11	6.0037e-11	7.4041e-11	1.9243e-11	4.3297e-11	3.8955e-11	7.5857e-11	5.9072e-11	5.9372e-11	5.2614e-11	6.9206e-11
2024-05-29T18:18:26.137	4.23351e-09	8.22142e-10	5.18546e-10	5.64392e-10	1.18111e-10	1.29452e-10	9.0336e-11	1.11611e-10	1.27661e-10	7.6203e-11	9.2329e-11	7.4056e-11	1.09205e-10	7.7527e-11	5.7254e-11	7.2984e-11	8.2979e-11	4.5555e-11	5.6216e-11	7.1213e-11	3.78743e-10	5.2258e-11	1.16248e-10	6.0146e-11	7.8563e-11	1.3633e-10	1.10673e-10	8.0828e-11	4.915e-11	4.1292e-10	4.9886e-11	1.15067e-10	6.4416e-11	6.9814e-11	6.3079e-11	5.8129e-11	4.9066e-11	5.6099e-11	8.4283e-11	6.5767e-11	2.7036e-11	3.8486e-11	3.8726e-11	5.509e-11	6.7849e-11	4.403e-11	4.8477e-11	6.2886e-11	6.9206e-11
2024-05-29T18:18:29.598	5.32905e-09	1.03762e-09	7.08184e-10	2.82012e-10	1.50986e-10	1.13123e-10	7.8682e-11	1.35233e-10	1.07047e-10	6.1539e-11	8.527e-11	1.02324e-10	8.4883e-11	6.7141e-11	8.0969e-11	7.8023e-11	7.3181e-11	5.8071e-11	9.3223e-11	4.45026e-10	7.1643e-11	1.0187e-10	4.6971e-11	8.0001e-11	7.1063e-11	1.23104e-10	1.31172e-10	6.4479e-11	4.35815e-10	4.6332e-11	8.6406e-11	9.0534e-11	9.2833e-11	6.7448e-11	2.5752e-11	5.5146e-11	6.4243e-11	6.9968e-11	7.7705e-11	7.1036e-11	5.7352e-11	3.8486e-11	6.422e-11	4.3553e-11	3.9173e-11	5.9072e-11	8.3965e-11	6.5955e-11	2.8253e-11
2024-05-29T18:18:33.054	3.86261e-09	1.06306e-09	5.86358e-10	2.68468e-10	1.54329e-10	1.06177e-10	9.4893e-11	1.3226e-10	9.3048e-11	5.05671e-10	6.902e-11	8.3547e-11	1.03361e-10	7.9126e-11	6.15e-11	9.8176e-11	9.5816e-11	8.0531e-11	2.14677e-10	6.3274e-11	8.218e-11	7.5729e-11	7.0457e-11	8.5059e-11	9.3259e-11	1.33141e-10	1.27794e-10	5.4494e-11	7.5745e-11	7.2203e-11	6.5993e-11	4.3491e-11	5.3597e-11	6.2444e-11	6.0393e-11	2.45246e-10	6.1508e-11	7.7101e-11	4.2141e-11	6.8452e-11	5.7352e-11	5.0913e-11	1.9363e-11	5.1532e-11	5.8759e-11	5.9072e-11	6.2584e-11	7.1701e-11	3.9956e-11
2024-05-29T18:18:36.513	3.69112e-09	1.12353e-09	5.25491e-10	2.3822e-10	1.52109e-10	1.74553e-10	1.08714e-10	1.35233e-10	1.17264e-10	1.15677e-10	8.3787e-11	9.7329e-11	1.08062e-10	7.252e-11	5.2666e-11	1.05643e-10	7.9847e-11	4.66244e-10	5.1318e-11	9.6653e-11	7.5319e-11	2.8623e-11	1.6607e-11	4.7182e-11	7.1063e-11	1.13433e-10	1.02463e-10	6.6741e-11	7.3725e-11	6.0662e-11	8.6406e-11	4.3491e-11	5.6496e-11	5.0986e-11	3.1539e-11	4.5026e-11	6.6866e-11	2.6445e-11	4.6164e-11	4.2452e-11	5.058e-11	2.7214e-11	3.8726e-11	7.0226e-11	8.0757e-11	6.2268e-11	2.7988e-11	7.7019e-11	4.8936e-11
2024-05-29T18:18:39.972	6.17093e-09	1.10375e-09	5.52945e-10	2.53386e-10	1.75963e-10	1.24656e-10	1.17425e-10	1.18521e-10	3.46321e-10	9.1278e-11	1.24675e-10	1.2531e-10	6.499e-11	1.5825e-11	7.2768e-11	1.01978e-10	8.8913e-11	4.39611e-10	5.3822e-11	1.36689e-10	9.8616e-11	4.6741e-11	4.6971e-11	6.6726e-11	9.9093e-11	1.14687e-10	1.08006e-10	7.897e-11	6.5019e-11	5.808e-11	3.0549e-11	4.6976e-11	5.0532e-11	5.7004e-11	4.8177e-11	3.1839e-11	6.939e-11	6.4778e-11	4.2141e-11	1.18563e-10	5.4072e-11	3.333e-11	1.9363e-11	4.3553e-11	4.7977e-11	5.9072e-11	0	5.6247e-11	5.2857e-11
2024-05-29T18:18:43.433	4.48225e-09	9.44626e-10	6.03623e-10	1.9415e-10	2.15114e-10	6.9821e-11	5.811e-11	1.12792e-10	4.39922e-10	5.5043e-11	1.05033e-10	7.8944e-11	8.0373e-11	7.5895e-11	1.04127e-10	1.00727e-10	1.0948e-10	8.2125e-11	8.114e-11	7.1213e-11	9.7237e-11	4.3722e-11	4.0678e-11	1.1677e-10	6.2672e-11	1.54054e-10	9.9577e-11	8.2645e-11	5.4951e-11	3.9157e-11	2.4943e-11	7.3207e-11	7.1463e-11	5.0986e-11	4.24709e-10	4.8634e-11	6.6866e-11	4.9475e-11	7.299e-11	7.5941e-11	5.4072e-11	4.7136e-11	5.123e-11	3.57556e-10	1.9586e-11	9.0235e-11	7.1356e-11	5.2614e-11	5.9934e-11
2024-05-29T18:18:46.891	4.06971e-09	9.84103e-10	4.65102e-10	3.31939e-10	1.85379e-10	8.9005e-11	1.31014e-10	5.27536e-10	1.63517e-10	1.15677e-10	6.7179e-11	8.2042e-11	1.04556e-10	9.7553e-11	5.7254e-11	1.35139e-10	9.5816e-11	5.5793e-11	6.072e-11	7.8351e-11	9.9977e-11	6.4002e-11	6.2137e-11	8.5059e-11	9.622e-11	1.2878e-10	1.13278e-10	1.0195e-10	6.2654e-11	7.6332e-11	6.1098e-11	5.3266e-11	7.3662e-11	9.7074e-11	5.4628e-11	7.1193e-11	7.1825e-11	5.9134e-11	5.3305e-11	5.3698e-11	2.7036e-11	3.333e-11	4.01052e-10	7.5435e-11	5.8759e-11	2.7847e-11	4.4253e-11	3.9773e-11	5.9934e-11
2024-05-29T18:18:50.352	4.15971e-09	1.13711e-09	6.00612e-10	2.30262e-10	1.89912e-10	1.54161e-10	1.0065e-10	1.82744e-10	1.32554e-10	6.5514e-11	1.0622e-10	8.7909e-11	8.4883e-11	8.9521e-11	4.89687e-10	1.13737e-10	1.39217e-10	4.8318e-11	5.8511e-11	8.4892e-11	5.6936e-11	5.2258e-11	8.3035e-11	4.08949e-10	8.0329e-11	1.6654e-10	1.14558e-10	8.4422e-11	5.2131e-11	5.808e-11	6.5993e-11	8.5151e-11	3.9949e-11	2.5493e-11	4.8177e-11	4.8634e-11	7.4181e-11	1.87e-11	5.6539e-11	7.3529e-11	4.2748e-11	3.8486e-11	6.1231e-11	7.5435e-11	5.8759e-11	4.8232e-11	5.2361e-11	3.4444e-11	6.9206e-11
2024-05-29T18:18:53.804	5.34922e-09	9.46039e-10	7.83434e-10	3.31315e-10	2.26667e-10	1.24656e-10	1.07412e-10	6.512e-11	1.50544e-10	8.2564e-11	6.902e-11	8.5026e-11	8.9166e-11	8.223e-11	7.7792e-11	9.946e-11	1.07125e-10	3.6014e-11	4.2935e-11	1.00711e-10	7.5319e-11	7.0112e-11	4.64103e-10	6.4606e-11	7.3011e-11	1.27665e-10	9.6603e-11	8.0828e-11	1.7377e-11	7.2203e-11	3.5275e-11	4.01363e-10	7.7875e-11	5.7004e-11	4.0717e-11	5.1992e-11	8.6985e-11	4.1814e-11	4.2141e-11	6.8452e-11	5.4072e-11	6.0852e-11	3.8726e-11	8.0307e-11	4.3797e-11	2.7847e-11	3.4278e-11	9.9432e-11	3.9956e-11
2024-05-29T18:18:57.269	3.9471e-09	1.03698e-09	4.87308e-10	1.92005e-10	1.48716e-10	8.7277e-11	1.46241e-10	1.33258e-10	1.24631e-10	8.5567e-11	4.7503e-11	1.12755e-10	1.5841e-10	4.7158e-10	9.1219e-11	1.09185e-10	1.00999e-10	7.2029e-11	7.0736e-11	7.8351e-11	6.9732e-11	7.7511e-11	4.37175e-10	8.9832e-11	6.4871e-11	1.35277e-10	1.20754e-10	5.1698e-11	7.3725e-11	9.2663e-11	4.9886e-11	3.0753e-11	9.1098e-11	5.4078e-11	4.4603e-11	5.5146e-11	5.5636e-11	6.9968e-11	2.6653e-11	7.5941e-11	4.6828e-11	3.333e-11	6.7075e-11	7.2877e-11	3.3925e-11	0	6.8557e-11	4.4467e-11	8.7082e-11
2024-05-29T18:19:00.721	3.70194e-09	1.48326e-09	4.25763e-10	2.6692e-10	1.6291e-10	1.4394e-10	1.0476e-10	1.40047e-10	9.4407e-11	8.4079e-11	7.7572e-11	2.7347e-11	5.0334e-10	7.0772e-11	1.06521e-10	9.946e-11	1.08309e-10	8.2125e-11	1.02635e-10	1.35709e-10	6.5744e-11	4.63598e-10	8.7876e-11	8.6679e-11	9.7667e-11	1.18367e-10	1.08006e-10	5.4494e-11	6.5019e-11	5.808e-11	7.055e-11	1.08001e-10	8.9329e-11	5.0986e-11	5.4628e-11	3.1839e-11	5.8645e-11	4.9475e-11	2.05588e-10	4.6504e-11	7.1531e-11	4.7136e-11	7.245e-11	8.2635e-11	6.1938e-11	4.403e-11	6.5638e-11	6.2886e-11	3.9956e-11
2024-05-29T18:19:04.180	3.96412e-09	1.03827e-09	4.7918e-10	3.15952e-10	2.04575e-10	1.52172e-10	1.77529e-10	9.4929e-11	9.5746e-11	1.02975e-10	1.3153e-10	8.9315e-11	1.02152e-10	6.898e-11	7.1014e-11	1.15945e-10	1.10639e-10	3.6014e-11	6.691e-11	7.4867e-11	5.9261e-11	7.9253e-11	4.6971e-11	6.0146e-11	6.2672e-11	1.3098e-10	1.08006e-10	5.4494e-11	4.12683e-10	8.2137e-11	5.5775e-11	9.8857e-11	7.9898e-11	6.4994e-11	6.3079e-11	6.0966e-11	5.8645e-11	3.77253e-10	6.2506e-11	3.797e-11	5.4072e-11	6.0852e-11	6.1231e-11	4.7709e-11	3.9173e-11	1.9691e-11	3.42213e-10	5.6247e-11	4.8936e-11
2024-05-29T18:19:07.638	4.62129e-09	1.08544e-09	6.86522e-10	2.24801e-10	1.60808e-10	1.01781e-10	1.17425e-10	1.31254e-10	1.07047e-10	4.54171e-10	1.16358e-10	7.5721e-11	7.722e-11	7.5895e-11	7.448e-11	9.4221e-11	9.4476e-11	8.8217e-11	4.2935e-11	7.1213e-11	8.052e-11	9.201e-11	8.4679e-11	4.7182e-11	1.14831e-10	8.6222e-11	1.27794e-10	7.897e-11	7.7713e-11	9.7501e-11	4.9886e-11	7.7393e-11	8.9329e-11	6.7448e-11	4.0717e-11	4.24381e-10	7.1825e-11	6.202e-11	4.2141e-11	7.5941e-11	6.8929e-11	4.3029e-11	4.7429e-11	3.8955e-11	3.69037e-10	6.8211e-11	3.4278e-11	5.6247e-11	5.2857e-11
2024-05-29T18:19:11.097	4.43392e-09	9.03426e-10	5.13275e-10	2.3822e-10	1.47567e-10	7.8063e-11	1.1253e-10	1.23985e-10	1.07047e-10	1.0659e-10	8.6728e-11	1.30199e-10	8.3407e-11	5.0044e-11	7.448e-11	1.00727e-10	4.85162e-10	7.2029e-11	9.18e-11	9.2418e-11	7.7092e-11	4.9576e-11	6.2137e-11	8.6679e-11	1.25344e-10	1.2426e-10	1.10673e-10	9.1187e-11	6.0196e-11	5.2535e-11	5.8497e-11	6.1506e-11	5.9254e-11	8.455e-11	2.5752e-11	7.7988e-11	1.01576e-10	1.87e-11	5.6539e-11	5.3698e-11	7.1531e-11	7.4528e-11	2.7383e-11	7.2877e-11	5.1821e-11	5.9072e-11	1.9791e-11	6.5955e-11	5.2857e-11
2024-05-29T18:19:14.555	4.47774e-09	1.01023e-09	4.25763e-10	2.92821e-10	1.36798e-10	8.9005e-11	1.2885e-10	5.3995e-11	1.094e-10	8.5567e-11	9.6316e-11	1.13855e-10	7.722e-11	9.3623e-11	7.6154e-11	7.8023e-11	1.22662e-10	1.00583e-10	3.975e-11	5.6594e-11	6.9732e-11	9.0514e-11	5.2516e-11	8.5059e-11	4.45997e-10	1.01458e-10	1.32279e-10	6.2133e-11	6.5019e-11	3.9157e-11	7.2721e-11	8.1365e-11	9.1098e-11	5.0986e-11	5.1504e-11	5.8129e-11	7.1825e-11	5.6099e-11	7.9958e-11	5.6956e-11	8.7607e-11	7.6973e-11	3.3538e-11	8.2635e-11	5.8759e-11	5.5694e-11	0	6.8888e-11	2.8253e-11
2024-05-29T18:19:18.013	3.88e-09	1.23457e-09	6.22352e-10	2.63798e-10	1.86294e-10	9.7187e-11	1.472e-10	8.6146e-11	9.837e-11	7.106e-11	7.9172e-11	6.115e-11	9.4574e-11	8.223e-11	4.81642e-10	9.2866e-11	9.5816e-11	3.9452e-11	7.4366e-11	9.8024e-11	5.4512e-11	3.3051e-11	5.7528e-11	4.4823e-10	5.5553e-11	1.12166e-10	9.3536e-11	4.5593e-11	5.4951e-11	7.0047e-11	2.4943e-11	5.8887e-11	9.621e-11	6.9814e-11	7.9372e-11	6.8779e-11	2.6227e-11	4.5805e-11	5.3305e-11	6.8452e-11	6.0454e-11	4.7136e-11	6.422e-11	8.2635e-11	0	3.4105e-11	8.6265e-11	8.1993e-11	4.4672e-11
2024-05-29T18:19:21.474	3.52543e-09	8.95256e-10	4.91013e-10	3.09999e-10	2.07055e-10	4.8468e-10	1.37309e-10	1.40047e-10	1.64294e-10	9.5337e-11	7.5939e-11	7.7349e-11	7.2232e-11	8.223e-11	9.1219e-11	7.9632e-11	5.9752e-11	1.16143e-10	6.072e-11	3.2675e-11	9.4418e-11	5.9583e-11	4.58122e-10	4.0861e-11	1.40139e-10	1.46441e-10	1.11983e-10	5.4494e-11	8.8606e-11	3.0331e-11	5.8497e-11	4.50228e-10	5.3597e-11	5.7004e-11	5.4628e-11	4.5026e-11	5.2454e-11	6.9968e-11	7.0516e-11	8.2755e-11	9.5587e-11	5.7729e-11	5.8089e-11	6.1593e-11	4.7977e-11	0	5.9372e-11	4.4467e-11	6.3176e-11
2024-05-29T18:19:24.933	4.31697e-09	1.38162e-09	4.222e-10	2.39952e-10	1.69059e-10	1.03267e-10	1.3628e-10	9.0644e-11	1.25646e-10	1.07767e-10	1.19546e-10	1.01098e-10	4.52467e-10	5.0044e-11	1.12283e-10	1.04436e-10	8.8913e-11	5.5793e-11	5.3822e-11	9.0963e-11	5.9261e-11	4.37847e-10	4.6971e-11	1.28132e-10	9.3259e-11	1.21937e-10	1.03877e-10	6.4479e-11	7.5745e-11	4.2895e-11	1.54768e-10	7.1021e-11	4.3762e-11	5.0986e-11	4.4603e-11	5.1992e-11	4.9066e-11	6.7423e-11	6.7951e-11	6.0037e-11	5.7352e-11	5.4428e-11	7.245e-11	6.4599e-11	5.8759e-11	3.4105e-11	5.2361e-11	4.8711e-11	8.2371e-11
2024-05-29T18:19:28.388	4.68782e-09	9.56571e-10	7.154e-10	5.47251e-10	1.29121e-10	1.23428e-10	8.218e-11	6.7125e-11	9.7067e-11	9.265e-11	1.15276e-10	9.7329e-11	9.3252e-11	7.5895e-11	7.6154e-11	8.8674e-11	8.4502e-11	8.0531e-11	9.3223e-11	1.07132e-10	1.07778e-10	5.9583e-11	5.7528e-11	5.2751e-11	7.4907e-11	1.45462e-10	1.02463e-10	7.3112e-11	7.1648e-11	4.18453e-10	8.9934e-11	1.63695e-10	8.7524e-11	6.9814e-11	4.8177e-11	5.8129e-11	5.2454e-11	4.5805e-11	3.7692e-11	7.5941e-11	5.7352e-11	7.6973e-11	7.7452e-11	7.0226e-11	1.9586e-11	6.5307e-11	6.8557e-11	8.8934e-11	6.626e-11
2024-05-29T18:19:31.849	5.00996e-09	9.43211e-10	7.0861e-10	3.01189e-10	1.90806e-10	1.52172e-10	1.4234e-10	1.25049e-10	7.8176e-11	9.1278e-11	6.3337e-11	1.23313e-10	6.8707e-11	6.5249e-11	7.7792e-11	8.2756e-11	1.15156e-10	3.9452e-11	6.072e-11	1.05879e-10	7.1643e-11	7.2033e-11	5.2516e-11	8.1722e-11	9.622e-11	1.18367e-10	1.24324e-10	6.2133e-11	4.2742e-10	3.0331e-11	6.8309e-11	7.3207e-11	9.2833e-11	7.4324e-11	4.4603e-11	7.7988e-11	4.1468e-11	3.50339e-10	8.2149e-11	7.5941e-11	6.8929e-11	2.7214e-11	6.422e-11	6.4599e-11	4.3797e-11	5.9072e-11	3.22169e-10	4.8711e-11	6.3176e-11
2024-05-29T18:19:35.305	3.85039e-09	1.40511e-09	5.03169e-10	3.1791e-10	1.67035e-10	6.7604e-11	8.8765e-11	9.2094e-11	8.5935e-11	5.729e-11	9.5006e-11	1.13855e-10	8.4883e-11	7.9126e-11	5.5007e-11	7.8023e-11	9.8441e-11	6.6407e-11	5.1318e-11	7.3063e-11	8.8511e-11	7.7511e-11	7.6102e-11	6.6726e-11	1.44087e-10	1.09587e-10	1.09348e-10	4.38671e-10	8.513e-11	7.4296e-11	3.5275e-11	6.6434e-11	7.1463e-11	8.0615e-11	5.4628e-11	6.0966e-11	2.41088e-10	1.87e-11	5.3305e-11	6.2967e-11	6.6225e-11	6.666e-11	5.4767e-11	2.7545e-11	4.3797e-11	3.51137e-10	5.2361e-11	5.6247e-11	6.3176e-11
2024-05-29T18:19:38.767	3.85913e-09	1.20444e-09	5.51851e-10	2.89263e-10	1.64985e-10	1.46042e-10	9.9242e-11	1.18521e-10	7.1365e-11	5.0468e-10	8.074e-11	9.2064e-11	8.0373e-11	5.482e-11	5.9415e-11	6.1682e-11	1.24722e-10	9.3914e-11	5.6216e-11	1.12004e-10	8.5404e-11	6.6102e-11	5.9877e-11	9.4364e-11	9.7667e-11	1.37374e-10	8.8736e-11	6.6741e-11	8.8606e-11	5.2535e-11	8.4586e-11	6.8765e-11	8.3798e-11	3.6052e-11	3.1539e-11	3.86459e-10	4.5426e-11	4.5805e-11	5.9597e-11	5.023e-11	7.647e-11	4.7136e-11	5.123e-11	2.7545e-11	3.72143e-10	5.5694e-11	6.8557e-11	7.7019e-11	6.626e-11
2024-05-29T18:19:42.222	3.70373e-09	7.94041e-10	5.15038e-10	2.32054e-10	1.44064e-10	1.24656e-10	1.69419e-10	1.17398e-10	4.69057e-10	7.106e-11	1.37129e-10	9.8602e-11	7.3932e-11	4.7476e-11	9.3943e-11	9.2866e-11	9.7138e-11	7.0205e-11	7.6116e-11	7.3063e-11	6.7768e-11	8.5869e-11	3.7134e-11	7.4601e-11	9.02e-11	1.02857e-10	8.8736e-11	8.2645e-11	4.915e-11	7.4296e-11	4.3203e-11	9.3952e-11	5.9254e-11	5.0986e-11	3.96443e-10	3.1839e-11	9.8132e-11	6.4778e-11	8.4283e-11	7.8278e-11	7.1531e-11	8.1642e-11	3.8726e-11	3.41825e-10	2.7699e-11	7.8763e-11	8.1599e-11	5.9659e-11	7.7374e-11
2024-05-29T18:19:45.680	4.4672e-09	7.48133e-10	5.34045e-10	2.85661e-10	2.48164e-10	1.38536e-10	1.31014e-10	1.55302e-10	1.42729e-10	1.12355e-10	9.0961e-11	1.49787e-10	7.722e-11	9.8828e-11	8.6974e-11	6.5666e-11	4.69943e-10	7.2029e-11	4.8684e-11	5.8905e-11	7.3504e-11	7.2033e-11	5.7528e-11	7.0773e-11	7.1063e-11	1.78154e-10	1.58368e-10	8.4422e-11	6.0196e-11	4.2895e-11	5.5775e-11	7.7393e-11	5.9254e-11	6.2444e-11	4.4603e-11	6.0966e-11	9.9869e-11	3.2389e-11	8.2149e-11	7.8278e-11	7.4041e-11	2.7214e-11	5.8089e-11	7.5435e-11	3.9173e-11	3.4105e-11	4.4253e-11	6.2886e-11	5.9934e-11
2024-05-29T18:19:49.139	4.73783e-09	1.09219e-09	4.55917e-10	2.78316e-10	1.56519e-10	1.11769e-10	1.59141e-10	4.67327e-10	1.90157e-10	8.8469e-11	9.6316e-11	8.9315e-11	1.03361e-10	5.2486e-11	5.5007e-11	8.7232e-11	1.21618e-10	8.6734e-11	7.6116e-11	9.3851e-11	9.9977e-11	2.3371e-11	5.5079e-11	9.5827e-11	9.7667e-11	1.46441e-10	1.19541e-10	8.9543e-11	1.25308e-10	5.808e-11	6.1098e-11	6.1506e-11	8.1871e-11	4.09079e-10	5.1504e-11	7.3528e-11	2.6227e-11	7.4799e-11	5.9597e-11	6.0037e-11	6.6225e-11	3.333e-11	3.70436e-10	5.1532e-11	4.7977e-11	3.4105e-11	8.3965e-11	4.8711e-11	7.4751e-11
2024-05-29T18:19:52.596	4.32788e-09	1.14413e-09	5.73859e-10	2.52568e-10	1.77886e-10	1.34076e-10	1.32081e-10	1.17398e-10	1.45381e-10	9.5337e-11	9.0961e-11	9.9858e-11	1.40099e-10	7.4227e-11	1.10015e-10	4.63781e-10	7.9847e-11	7.5544e-11	3.975e-11	1.39587e-10	9.1512e-11	5.4809e-11	7.0457e-11	5.5326e-11	4.40299e-10	1.20759e-10	1.14558e-10	4.8741e-11	7.1648e-11	8.9293e-11	7.483e-11	7.1021e-11	6.4416e-11	5.7004e-11	5.7583e-11	6.3677e-11	8.2937e-11	2.6445e-11	8.8397e-11	3.2883e-11	8.7607e-11	5.4428e-11	3.3538e-11	4.7709e-11	3.9173e-11	4.8232e-11	8.6265e-11	4.4467e-11	4.8936e-11
2024-05-29T18:19:56.063	3.19482e-09	1.07057e-09	6.43357e-10	2.63798e-10	1.96083e-10	1.39643e-10	1.19797e-10	1.41927e-10	5.5279e-11	1.54054e-10	5.4852e-11	8.5026e-11	6.6874e-11	1.02559e-10	4.67563e-10	9.5558e-11	1.1735e-10	1.15021e-10	7.0736e-11	8.1687e-11	7.8825e-11	4.3722e-11	3.3214e-11	4.17702e-10	5.0249e-11	1.12166e-10	1.18315e-10	6.6741e-11	6.7301e-11	4.6332e-11	8.2727e-11	1.21724e-10	4.07401e-10	6.7448e-11	5.7583e-11	6.8779e-11	3.709e-11	3.7399e-11	5.9597e-11	7.5941e-11	6.8929e-11	6.0852e-11	8.8732e-11	7.5435e-11	6.1938e-11	5.2097e-11	4.4253e-11	6.5955e-11	6.3176e-11
2024-05-29T18:19:59.514	4.58031e-09	1.16767e-09	6.14535e-10	2.4338e-10	2.26667e-10	1.59981e-10	1.43325e-10	1.33258e-10	1.28655e-10	8.5567e-11	8.6728e-11	1.36736e-10	8.1904e-11	4.14185e-10	5.5007e-11	1.20241e-10	6.9609e-11	1.15021e-10	7.6116e-11	9.5263e-11	7.1643e-11	1.03202e-10	4.42193e-10	6.4606e-11	6.9061e-11	1.20759e-10	1.17076e-10	5.7154e-11	7.5745e-11	8.0249e-11	4.6664e-11	4.29442e-10	7.7875e-11	6.4994e-11	3.1539e-11	6.8779e-11	4.1468e-11	7.2423e-11	7.0516e-11	6.0037e-11	8.1108e-11	6.3822e-11	5.123e-11	7.2877e-11	1.9586e-11	6.8211e-11	5.5976e-11	8.1993e-11	2.8253e-11
2024-05-29T18:20:02.972	4.11741e-09	1.10435e-09	6.26223e-10	2.07556e-10	2.25915e-10	1.71027e-10	1.18617e-10	1.0921e-10	1.11703e-10	1.07767e-10	5.2517e-11	1.10522e-10	4.78617e-10	7.5895e-11	8.2511e-11	7.9632e-11	5.2964e-11	7.2029e-11	5.3822e-11	1.12004e-10	1.05242e-10	7.5729e-11	7.2388e-11	6.0146e-11	8.2057e-11	1.10884e-10	9.1964e-11	7.5115e-11	1.30038e-10	5.808e-11	6.3593e-11	4.3491e-11	5.9254e-11	9.0131e-11	4.8177e-11	2.5996e-11	5.8645e-11	3.7399e-11	3.90349e-10	5.6956e-11	7.647e-11	6.0852e-11	2.7383e-11	3.8955e-11	5.1821e-11	4.403e-11	3.9581e-11	6.5955e-11	2.8253e-11
2024-05-29T18:20:06.432	3.39903e-09	1.32133e-09	5.13863e-10	2.50096e-10	2.15904e-10	1.47081e-10	1.08714e-10	9.0644e-11	1.16173e-10	6.5514e-11	1.08555e-10	6.5099e-11	6.305e-11	7.4227e-11	7.7792e-11	6.5666e-11	6.7752e-11	5.0932e-11	6.4912e-11	4.9012e-11	9.0024e-11	5.4809e-11	5.7528e-11	1.15572e-10	6.0392e-11	1.15926e-10	1.19541e-10	5.9696e-11	4.08269e-10	1.7512e-11	5.8497e-11	9.3952e-11	5.9254e-11	5.4078e-11	4.0717e-11	6.0966e-11	3.709e-11	6.4778e-11	6.2506e-11	5.023e-11	7.4041e-11	4.3029e-11	6.7075e-11	3.8955e-11	5.8759e-11	2.7847e-11	6.2584e-11	6.2886e-11	5.2857e-11
2024-05-29T18:20:09.888	4.22714e-09	9.00463e-10	5.15624e-10	2.21085e-10	1.81671e-10	1.15786e-10	1.37309e-10	7.4605e-11	9.7067e-11	8.703e-11	7.427e-11	1.30199e-10	8.4883e-11	8.5221e-11	5.2666e-11	7.9632e-11	9.5816e-11	6.8332e-11	6.285e-11	7.3063e-11	8.8511e-11	5.4809e-11	8.1357e-11	6.8779e-11	6.4871e-11	1.6307e-10	1.27794e-10	3.97099e-10	6.2654e-11	1.21325e-10	7.2721e-11	9.0534e-11	6.9193e-11	5.4078e-11	6.8133e-11	3.1839e-11	3.99907e-10	3.7399e-11	6.2506e-11	5.3698e-11	6.3405e-11	3.333e-11	2.7383e-11	3.8955e-11	6.7849e-11	3.44448e-10	5.2361e-11	4.4467e-11	3.4603e-11
2024-05-29T18:20:13.347	3.76016e-09	1.10616e-09	5.90466e-10	2.89978e-10	2.09505e-10	1.67426e-10	1.3833e-10	1.22912e-10	7.8176e-11	4.87936e-10	9.7609e-11	1.07086e-10	1.10337e-10	6.7141e-11	6.9216e-11	1.05643e-10	1.19503e-10	7.8904e-11	7.4366e-11	8.4892e-11	7.8825e-11	4.6741e-11	4.6971e-11	4.7182e-11	6.9061e-11	1.23104e-10	9.3536e-11	8.787e-11	8.1506e-11	7.6332e-11	5.8497e-11	6.1506e-11	5.6496e-11	7.6479e-11	3.6418e-11	3.92962e-10	7.8681e-11	6.4778e-11	4.2141e-11	7.8278e-11	6.0454e-11	5.4428e-11	3.8726e-11	3.3736e-11	3.67474e-10	4.403e-11	4.8477e-11	5.2614e-11	7.4751e-11
2024-05-29T18:20:16.808	4.13699e-09	8.0904e-10	4.69627e-10	2.0454e-10	1.59746e-10	1.15786e-10	1.46241e-10	1.13961e-10	3.28975e-10	7.106e-11	1.1743e-10	1.14945e-10	8.4883e-11	7.5895e-11	7.7792e-11	8.7232e-11	8.5997e-11	4.79411e-10	6.285e-11	1.46126e-10	5.9261e-11	4.6741e-11	3.3214e-11	8.1722e-11	5.5553e-11	1.18367e-10	8.7077e-11	5.1698e-11	6.5019e-11	5.808e-11	6.3593e-11	6.4017e-11	6.4416e-11	5.7004e-11	7.2837e-11	4.8634e-11	5.5636e-11	5.6099e-11	5.6539e-11	7.5941e-11	4.2748e-11	6.0852e-11	3.3538e-11	5.509e-11	3.9173e-11	4.8232e-11	5.5976e-11	4.4467e-11	6.3176e-11
2024-05-29T18:20:20.264	3.66384e-09	6.31986e-10	4.45867e-10	2.8054e-10	1.83534e-10	1.01781e-10	8.8765e-11	1.54447e-10	7.1365e-11	1.00494e-10	5.4852e-11	1.17094e-10	1.11457e-10	5.9212e-11	6.3517e-11	8.5766e-11	5.19923e-10	5.0932e-11	1.0517e-10	9.6653e-11	1.29412e-10	4.3722e-11	5.5079e-11	3.3363e-11	1.08551e-10	1.63945e-10	1.21956e-10	7.7067e-11	7.3725e-11	7.8315e-11	5.5775e-11	7.1021e-11	8.7524e-11	7.8574e-11	4.4603e-11	6.3677e-11	8.894e-11	4.9475e-11	4.2141e-11	2.6849e-11	7.4041e-11	4.7136e-11	3.8726e-11	4.3553e-11	8.5375e-11	2.7847e-11	3.9581e-11	5.9659e-11	5.6506e-11
2024-05-29T18:20:23.721	3.70732e-09	8.04901e-10	5.28358e-10	3.01876e-10	1.4288e-10	1.20934e-10	5.29912e-10	1.51851e-10	1.30619e-10	6.1539e-11	1.34359e-10	5.9077e-11	8.4883e-11	4.476e-11	7.6154e-11	1.35139e-10	5.9752e-11	5.5793e-11	5.6216e-11	9.0963e-11	6.3656e-11	5.7246e-11	7.9644e-11	7.4601e-11	6.6999e-11	1.45462e-10	1.43895e-10	8.4422e-11	6.2654e-11	6.3139e-11	6.8309e-11	4.6976e-11	8.5681e-11	4.7693e-11	7.5079e-11	4.5026e-11	7.1825e-11	3.2389e-11	2.6653e-11	6.2967e-11	3.3112e-11	3.95773e-10	5.123e-11	2.7545e-11	5.1821e-11	3.9382e-11	6.5638e-11	7.1701e-11	6.3176e-11
2024-05-29T18:20:27.182	3.84514e-09	9.39664e-10	5.28358e-10	2.63798e-10	1.86294e-10	1.13123e-10	1.37309e-10	1.04244e-10	1.2964e-10	1.0659e-10	7.0813e-11	6.8822e-11	1.33749e-10	7.252e-11	4.74256e-10	7.2984e-11	8.8913e-11	9.6637e-11	8.8885e-11	4.9012e-11	6.7768e-11	8.2627e-11	3.7134e-11	4.06561e-10	7.3011e-11	1.04238e-10	1.26648e-10	7.5115e-11	7.3725e-11	4.6332e-11	7.483e-11	4.3491e-11	9.9472e-11	5.0986e-11	8.1434e-11	5.5146e-11	4.9066e-11	6.9968e-11	3.2643e-11	7.8278e-11	7.647e-11	1.08856e-10	3.8726e-11	8.49e-11	7.062e-11	0	4.4253e-11	5.2614e-11	4.8936e-11
2024-05-29T18:20:30.639	4.04981e-09	9.03426e-10	4.9408e-10	3.20499e-10	1.54329e-10	5.47815e-10	1.17425e-10	1.01669e-10	9.167e-11	8.5567e-11	1.23668e-10	8.9315e-11	1.26099e-10	1.06159e-10	6.5472e-11	7.4701e-11	1.11785e-10	8.5226e-11	6.285e-11	7.8351e-11	1.09024e-10	4.0479e-11	9.6834e-11	9.2878e-11	9.9093e-11	1.54979e-10	8.5386e-11	6.8931e-11	1.20392e-10	7.6332e-11	7.055e-11	4.1068e-10	3.9949e-11	9.5386e-11	4.4603e-11	4.1103e-11	6.1508e-11	4.1814e-11	6.5285e-11	8.9049e-11	6.6225e-11	6.3822e-11	4.3297e-11	3.3736e-11	7.5857e-11	4.8232e-11	5.9372e-11	4.8711e-11	6.626e-11
2024-05-29T18:20:34.098	3.19903e-09	1.17753e-09	5.0795e-10	2.48434e-10	9.4056e-11	1.09008e-10	1.07412e-10	1.22912e-10	1.64294e-10	1.16763e-10	1.01389e-10	6.3156e-11	6.8707e-11	4.90067e-10	7.2768e-11	9.0093e-11	1.20566e-10	8.2125e-11	6.072e-11	7.3063e-11	1.06518e-10	8.0958e-11	4.21763e-10	3.3363e-11	1.17248e-10	1.50296e-10	1.11983e-10	3.8533e-11	6.5019e-11	4.2895e-11	5.8497e-11	5.3266e-11	8.1871e-11	5.4078e-11	8.5409e-11	5.8129e-11	4.9066e-11	1.04116e-10	4.2141e-11	3.797e-11	6.3405e-11	1.9243e-11	4.3297e-11	8.49e-11	6.4961e-11	7.6262e-11	4.4253e-11	6.8888e-11	7.9912e-11
2024-05-29T18:20:37.555	4.74351e-09	1.07119e-09	4.87308e-10	2.13459e-10	1.64985e-10	1.40729e-10	1.2885e-10	1.31254e-10	1.34461e-10	8.4079e-11	9.5006e-11	7.2354e-11	4.46664e-10	7.5895e-11	1.05331e-10	5.2822e-11	1.03493e-10	6.8332e-11	4.8684e-11	1.0461e-10	7.1643e-11	4.39093e-10	5.2516e-11	6.2416e-11	8.7034e-11	1.41476e-10	1.14558e-10	7.3112e-11	8.513e-11	8.579e-11	4.6664e-11	7.7393e-11	4.7268e-11	8.455e-11	4.4603e-11	6.3677e-11	8.0837e-11	6.9968e-11	2.34633e-10	7.1036e-11	1.0295e-10	3.333e-11	6.9814e-11	6.7471e-11	5.5399e-11	3.4105e-11	6.2584e-11	4.8711e-11	3.9956e-11
2024-05-29T18:20:41.015	4.72359e-09	1.1707e-09	5.59464e-10	2.84935e-10	1.26459e-10	1.38536e-10	1.37309e-10	1.04244e-10	1.02179e-10	1.3294e-10	6.5287e-11	4.56242e-10	3.5246e-11	1.10776e-10	6.3517e-11	7.9632e-11	1.21618e-10	8.0531e-11	6.285e-11	1.05879e-10	3.7045e-10	5.9583e-11	7.7893e-11	6.0146e-11	4.7375e-11	1.056e-10	1.10673e-10	4.8741e-11	7.3725e-11	6.5523e-11	7.483e-11	6.4017e-11	5.3597e-11	4.0308e-11	6.3079e-11	7.3528e-11	4.5426e-11	1.49598e-10	2.6653e-11	5.6956e-11	6.3405e-11	5.4428e-11	3.3538e-11	7.0226e-11	5.8759e-11	4.403e-11	4.8477e-11	6.2886e-11	4.4672e-11
2024-05-29T18:20:44.472	3.59724e-09	1.10556e-09	5.26639e-10	2.47599e-10	1.84459e-10	9.7187e-11	1.25532e-10	5.8699e-11	9.027e-11	7.2814e-11	6.3337e-11	9.9858e-11	1.04556e-10	7.4227e-11	4.7638e-11	6.9421e-11	9.3116e-11	5.3418e-11	7.9501e-11	8.9484e-11	8.5404e-11	5.4809e-11	6.4318e-11	7.0773e-11	1.09836e-10	1.35277e-10	8.7077e-11	5.1698e-11	7.7713e-11	4.9531e-11	8.4586e-11	5.8887e-11	8.5681e-11	6.4994e-11	6.3079e-11	4.1103e-11	5.8645e-11	3.80943e-10	4.6164e-11	7.3529e-11	6.6225e-11	6.3822e-11	5.123e-11	2.7545e-11	7.062e-11	5.5694e-11	3.41066e-10	5.9659e-11	3.4603e-11
2024-05-29T18:20:47.931	3.5216e-09	7.16205e-10	4.24341e-10	3.55441e-10	1.53223e-10	1.22187e-10	8.218e-11	1.45614e-10	1.12838e-10	1.10085e-10	4.60831e-10	7.8944e-11	7.5594e-11	5.9212e-11	8.4025e-11	7.8023e-11	9.5816e-11	5.0932e-11	1.0517e-10	1.05879e-10	1.19656e-10	2.3371e-11	2.3486e-11	7.8243e-11	8.0329e-11	1.3098e-10	1.27794e-10	8.787e-11	4.5975e-11	7.8315e-11	3.0549e-11	5.8887e-11	7.1463e-11	2.5493e-11	5.4628e-11	5.1992e-11	3.87679e-10	0	4.6164e-11	6.8452e-11	5.058e-11	5.0913e-11	3.8726e-11	3.8955e-11	7.5857e-11	5.9072e-11	5.2361e-11	3.9773e-11	5.2857e-11
2024-05-29T18:20:51.393	4.51368e-09	7.5789e-10	4.20047e-10	2.12486e-10	1.74018e-10	1.10397e-10	1.46241e-10	1.11611e-10	1.11703e-10	1.08932e-10	8.6728e-11	7.8944e-11	1.06906e-10	9.0909e-11	6.9216e-11	9.149e-11	1.30714e-10	1.00583e-10	4.41152e-10	7.1213e-11	1.17377e-10	6.1833e-11	4.6971e-11	1.01469e-10	8.7034e-11	1.21937e-10	1.38736e-10	3.91071e-10	5.7633e-11	1.1877e-10	6.8309e-11	7.1021e-11	1.7866e-11	3.6052e-11	3.6418e-11	5.8129e-11	5.8645e-11	7.7101e-11	1.8846e-11	7.1036e-11	5.058e-11	6.666e-11	3.3538e-11	7.7909e-11	6.1938e-11	8.1187e-11	5.5976e-11	4.8711e-11	6.3176e-11
2024-05-29T18:20:54.848	3.92486e-09	9.48859e-10	5.69632e-10	2.22019e-10	2.07875e-10	1.66513e-10	1.342e-10	1.20737e-10	4.7873e-11	4.93591e-10	7.0813e-11	1.26311e-10	1.14752e-10	6.129e-11	4.2013e-11	7.9632e-11	1.18432e-10	7.0205e-11	6.072e-11	9.6653e-11	9.4418e-11	2.8623e-11	4.9821e-11	5.7786e-11	7.1063e-11	1.49342e-10	9.3536e-11	8.2645e-11	8.8606e-11	8.7559e-11	3.0549e-11	6.6434e-11	6.4416e-11	4.7693e-11	6.3079e-11	3.6764e-10	4.5426e-11	8.771e-11	4.6164e-11	3.797e-11	8.9668e-11	4.7136e-11	4.3297e-11	4.3553e-11	3.64855e-10	4.8232e-11	7.6648e-11	9.9432e-11	7.9912e-11
2024-05-29T18:20:58.308	4.18713e-09	8.39029e-10	3.94836e-10	2.87107e-10	1.67035e-10	1.62812e-10	1.66909e-10	8.6146e-11	1.10558e-10	4.62434e-10	5.2517e-11	1.17094e-10	9.7166e-11	5.9212e-11	6.9216e-11	8.1209e-11	1.00999e-10	7.5544e-11	6.691e-11	9.3851e-11	8.8511e-11	4.6741e-11	7.6102e-11	7.6444e-11	9.622e-11	1.02857e-10	1.0103e-10	7.5115e-11	6.0196e-11	8.3983e-11	6.8309e-11	7.1021e-11	6.6847e-11	5.9786e-11	5.7583e-11	3.97238e-10	5.2454e-11	4.9475e-11	5.3305e-11	5.023e-11	3.3112e-11	6.9382e-11	6.422e-11	4.7709e-11	3.67996e-10	8.3541e-11	4.4253e-11	3.9773e-11	5.6506e-11
2024-05-29T18:21:01.770	5.07007e-09	7.02077e-10	5.77009e-10	3.24327e-10	2.32594e-10	1.55146e-10	1.25532e-10	1.28185e-10	7.8176e-11	8.9884e-11	7.9172e-11	8.7909e-11	7.8812e-11	8.3739e-11	8.2511e-11	1.04436e-10	1.48952e-10	6.6407e-11	9.4625e-11	9.9377e-11	8.052e-11	5.4809e-11	4.0678e-11	5.5326e-11	5.2967e-11	3.486e-10	9.1964e-11	8.6163e-11	4.5975e-11	9.2663e-11	3.0549e-11	5.0219e-11	7.9898e-11	5.4078e-11	7.5079e-11	4.1103e-11	3.709e-11	4.1814e-11	5.9597e-11	6.8452e-11	4.6828e-11	2.7214e-11	7.9836e-11	3.40156e-10	8.3098e-11	5.2097e-11	3.4278e-11	7.1701e-11	5.9934e-11
2024-05-29T18:21:05.222	4.14999e-09	1.02075e-09	6.27188e-10	2.68468e-10	1.79788e-10	1.15786e-10	1.39343e-10	1.33258e-10	1.3159e-10	7.9447e-11	6.1326e-11	9.8602e-11	1.19004e-10	5.482e-11	5.9415e-11	4.67594e-10	9.4476e-11	9.5285e-11	6.691e-11	1.35709e-10	6.3656e-11	3.3051e-11	5.2516e-11	8.3407e-11	4.34527e-10	1.6307e-10	1.46904e-10	4.8741e-11	7.9632e-11	3.9157e-11	8.6406e-11	7.9404e-11	8.5681e-11	6.4994e-11	7.2837e-11	4.5026e-11	2.6227e-11	6.4778e-11	5.9597e-11	5.3698e-11	4.6828e-11	5.7729e-11	6.422e-11	4.7709e-11	3.9173e-11	3.9382e-11	3.4278e-11	4.8711e-11	7.4751e-11
2024-05-29T18:21:08.680	5.04478e-09	1.00093e-09	5.77009e-10	2.50922e-10	1.93462e-10	1.09008e-10	1.15003e-10	1.58679e-10	1.07047e-10	1.10085e-10	9.5006e-11	5.9077e-11	6.1047e-11	6.7141e-11	4.6864e-10	8.7232e-11	1.43724e-10	4.8318e-11	7.6116e-11	8.4892e-11	6.1498e-11	8.0958e-11	5.2516e-11	4.18367e-10	7.1063e-11	1.19569e-10	9.8101e-11	6.4479e-11	7.5745e-11	6.5523e-11	6.1098e-11	8.3279e-11	6.9193e-11	1.0511e-10	8.3445e-11	5.5146e-11	4.9066e-11	5.6099e-11	7.0516e-11	8.0548e-11	5.058e-11	7.6973e-11	6.422e-11	3.3736e-11	7.8346e-11	5.5694e-11	8.3965e-11	4.4467e-11	4.4672e-11
2024-05-29T18:21:12.142	4.36197e-09	1.34636e-09	6.56835e-10	2.99119e-10	1.70063e-10	1.7629e-10	9.4893e-11	1.51851e-10	1.62737e-10	9.9229e-11	8.527e-11	1.01098e-10	8.1904e-11	4.88788e-10	7.1014e-11	1.57662e-10	9.4476e-11	9.5285e-11	3.2456e-11	7.4867e-11	6.7768e-11	7.2033e-11	4.50228e-10	8.9832e-11	1.20784e-10	1.29885e-10	1.0103e-10	5.4494e-11	4.915e-11	6.3139e-11	6.8309e-11	5.8887e-11	8.7524e-11	5.4078e-11	6.5654e-11	3.1839e-11	5.5636e-11	4.5805e-11	4.6164e-11	4.6504e-11	4.2748e-11	2.7214e-11	2.7383e-11	3.3736e-11	6.4961e-11	4.403e-11	3.9581e-11	7.4408e-11	5.2857e-11
2024-05-29T18:21:15.597	4.0961e-09	1.12769e-09	4.72194e-10	2.98426e-10	1.09127e-10	1.2827e-10	1.24406e-10	1.33258e-10	1.26649e-10	8.102e-11	1.02618e-10	7.061e-11	4.17332e-10	8.9521e-11	5.9415e-11	8.1209e-11	1.44608e-10	8.8217e-11	6.691e-11	8.6449e-11	9.8616e-11	4.54976e-10	4.3938e-11	1.30283e-10	8.0329e-11	1.19569e-10	1.32279e-10	1.7233e-11	6.7301e-11	3.9157e-11	7.483e-11	7.5329e-11	5.9254e-11	1.00365e-10	4.8177e-11	0	4.9066e-11	2.6445e-11	5.3305e-11	5.3698e-11	6.0454e-11	4.3029e-11	5.4767e-11	6.1593e-11	7.3286e-11	4.403e-11	1.9791e-11	7.9545e-11	4.4672e-11
2024-05-29T18:21:19.062	4.8321e-09	5.45788e-10	6.31029e-10	5.78884e-10	2.09505e-10	8.3713e-11	1.08714e-10	1.36209e-10	8.2918e-11	1.13473e-10	8.2278e-11	8.0508e-11	6.6874e-11	1.01331e-10	8.5512e-11	8.5766e-11	1.02254e-10	8.0531e-11	6.691e-11	7.8351e-11	4.60796e-10	2.3371e-11	7.4268e-11	7.2713e-11	4.4316e-11	1.12166e-10	9.3536e-11	7.5115e-11	6.0196e-11	4.12549e-10	5.2912e-11	1.39799e-10	4.3762e-11	4.7693e-11	9.6354e-11	8.0125e-11	6.6866e-11	1.26828e-10	4.2141e-11	6.2967e-11	6.8929e-11	6.0852e-11	3.3538e-11	4.7709e-11	5.5399e-11	7.6262e-11	5.2361e-11	6.2886e-11	3.9956e-11
2024-05-29T18:21:22.519	4.00971e-09	1.14704e-09	4.78549e-10	2.06555e-10	1.58678e-10	9.4e-11	1.17425e-10	9.9028e-11	8.5935e-11	7.7842e-11	9.5006e-11	2.21608e-10	1.48702e-10	7.7527e-11	5.2666e-11	8.4274e-11	9.1737e-11	7.2029e-11	5.8511e-11	1.0837e-10	6.3656e-11	8.4264e-11	5.7528e-11	1.21442e-10	5.8023e-11	1.02857e-10	7.2453e-11	8.0828e-11	7.1648e-11	7.2203e-11	9.4981e-11	3.551e-11	2.5266e-11	4.4155e-11	5.4628e-11	4.8634e-11	6.939e-11	4.07122e-10	1.8846e-11	1.8985e-11	4.2748e-11	7.6973e-11	4.7429e-11	6.7471e-11	6.4961e-11	6.2268e-11	3.35275e-10	6.8888e-11	1.13013e-10
2024-05-29T18:21:25.977	4.20638e-09	8.96747e-10	4.84821e-10	2.60639e-10	2.01221e-10	1.51168e-10	1.472e-10	9.2094e-11	1.03417e-10	9.1278e-11	1.05033e-10	1.16024e-10	7.0492e-11	6.898e-11	1.00429e-10	1.17034e-10	9.0336e-11	1.11586e-10	7.2574e-11	5.1663e-11	1.15052e-10	5.7246e-11	6.8472e-11	5.7786e-11	9.622e-11	1.53123e-10	9.0364e-11	4.12505e-10	6.0196e-11	8.0249e-11	6.3593e-11	6.1506e-11	1.7866e-11	5.4078e-11	7.0524e-11	6.6277e-11	5.5636e-11	6.9968e-11	1.8846e-11	3.2883e-11	8.1108e-11	6.3822e-11	7.7452e-11	3.8955e-11	4.7977e-11	1.39235e-10	5.5976e-11	0	5.6506e-11
2024-05-29T18:21:29.451	4.47172e-09	8.16436e-10	5.17379e-10	2.46761e-10	2.02905e-10	1.67426e-10	1.10001e-10	1.15118e-10	8.444e-11	9.6652e-11	1.35289e-10	1.17094e-10	7.722e-11	6.7141e-11	6.5472e-11	8.5766e-11	7.3181e-11	7.0205e-11	7.2574e-11	6.3274e-11	7.5319e-11	3.3051e-11	4.0678e-11	8.0001e-11	4.7375e-11	1.13433e-10	1.21956e-10	8.2645e-11	6.2654e-11	5.5377e-11	7.8877e-11	7.5329e-11	5.3597e-11	4.7693e-11	5.1504e-11	2.5996e-11	3.85455e-10	0	5.9597e-11	6.8452e-11	7.647e-11	5.7729e-11	4.3297e-11	3.8955e-11	6.7849e-11	3.53887e-10	4.8477e-11	6.8888e-11	6.3176e-11
2024-05-29T18:21:32.890	3.36319e-09	1.00956e-09	4.39038e-10	3.19854e-10	1.76927e-10	1.01781e-10	1.02038e-10	1.3226e-10	1.24631e-10	9.265e-11	6.7179e-11	1.01098e-10	1.05738e-10	8.8111e-11	8.4025e-11	6.757e-11	9.4476e-11	4.41965e-10	1.0517e-10	1.2549e-10	2.8468e-11	6.6102e-11	6.4318e-11	7.6444e-11	1.03252e-10	1.056e-10	4.04121e-10	5.4494e-11	5.7633e-11	3.5023e-11	8.6406e-11	5.6147e-11	5.6496e-11	4.0308e-11	4.8177e-11	7.5791e-11	5.2454e-11	5.2891e-11	5.9597e-11	3.797e-11	3.3112e-11	3.8486e-11	5.123e-11	6.7471e-11	8.9756e-11	5.2097e-11	5.2361e-11	4.4467e-11	4.4672e-11
2024-05-29T18:21:36.347	3.78336e-09	1.32335e-09	5.58923e-10	2.76824e-10	2.49531e-10	1.04732e-10	1.41348e-10	9.3522e-11	4.87687e-10	7.2814e-11	8.8162e-11	1.05915e-10	7.722e-11	5.0044e-11	4.4913e-11	7.4701e-11	7.3181e-11	7.7242e-11	8.2747e-11	1.03327e-10	1.15052e-10	6.8136e-11	3.7134e-11	9.4364e-11	9.7667e-11	9.7138e-11	1.09348e-10	9.1187e-11	5.7633e-11	4.6332e-11	3.9439e-11	9.0534e-11	6.6847e-11	6.9814e-11	4.08391e-10	7.3528e-11	6.1508e-11	1.87e-11	6.7951e-11	1.8985e-11	5.058e-11	4.7136e-11	7.4992e-11	3.67497e-10	2.7699e-11	3.9382e-11	5.5976e-11	4.4467e-11	5.2857e-11
2024-05-29T18:21:39.806	4.69213e-09	1.12532e-09	5.52945e-10	3.26909e-10	1.61862e-10	1.30624e-10	6.4969e-11	5.09117e-10	1.42729e-10	1.52406e-10	9.3677e-11	1.26311e-10	9.969e-11	5.0044e-11	6.15e-11	6.757e-11	1.02254e-10	7.5544e-11	6.691e-11	1.12004e-10	7.8825e-11	5.9583e-11	7.2388e-11	7.4601e-11	1.12361e-10	1.2878e-10	1.27794e-10	6.2133e-11	9.6752e-11	7.2203e-11	3.9439e-11	5.3266e-11	7.1463e-11	5.7004e-11	3.1539e-11	8.4237e-11	7.4181e-11	4.5805e-11	5.3305e-11	7.1036e-11	6.0454e-11	5.4428e-11	3.7795e-10	4.3553e-11	5.1821e-11	3.4105e-11	3.4278e-11	3.4444e-11	1.9978e-11
2024-05-29T18:21:43.264	3.69654e-09	9.6422e-10	4.23629e-10	2.46761e-10	1.70063e-10	1.15786e-10	1.1622e-10	1.16263e-10	1.46254e-10	9.9229e-11	1.01389e-10	6.115e-11	4.9845e-11	1.03773e-10	4.80593e-10	9.946e-11	9.1737e-11	7.3808e-11	1.02635e-10	8.3305e-11	7.1643e-11	7.0112e-11	9.096e-11	4.40401e-10	7.3011e-11	1.19569e-10	1.31172e-10	2.9848e-11	8.3338e-11	6.5523e-11	6.1098e-11	8.8776e-11	8.9329e-11	4.7693e-11	3.1539e-11	4.8634e-11	4.5426e-11	3.2389e-11	7.299e-11	6.5767e-11	4.2748e-11	6.0852e-11	9.082e-11	5.8432e-11	2.7699e-11	3.4105e-11	5.5976e-11	7.1701e-11	4.8936e-11
2024-05-29T18:21:46.723	4.29508e-09	1.25123e-09	6.25741e-10	2.50096e-10	2.79137e-10	5.05903e-10	1.48152e-10	1.4921e-10	1.05851e-10	9.265e-11	8.9572e-11	1.24317e-10	8.7761e-11	6.7141e-11	8.9827e-11	6.9421e-11	1.49805e-10	8.8217e-11	1.00036e-10	6.7361e-11	9.0024e-11	6.8136e-11	4.71473e-10	6.4606e-11	7.8563e-11	1.13433e-10	1.26648e-10	3.8533e-11	7.3725e-11	6.3139e-11	6.5993e-11	4.31639e-10	7.1463e-11	5.7004e-11	7.2837e-11	4.8634e-11	6.6866e-11	5.6099e-11	9.0383e-11	4.6504e-11	9.3656e-11	4.7136e-11	6.1231e-11	8.49e-11	5.1821e-11	5.2097e-11	4.8477e-11	3.9773e-11	4.8936e-11
2024-05-29T18:21:50.182	3.83111e-09	8.18886e-10	4.42466e-10	2.46761e-10	5.05162e-10	1.71915e-10	9.6365e-11	1.02964e-10	7.4848e-11	6.926e-11	8.527e-11	6.115e-11	1.14752e-10	6.5249e-11	7.6154e-11	1.09185e-10	8.1428e-11	7.5544e-11	7.2574e-11	6.9314e-11	5.9261e-11	7.9253e-11	8.7876e-11	1.00088e-10	5.2967e-11	1.2426e-10	1.37681e-10	3.8533e-11	5.7633e-11	9.7501e-11	4.23667e-10	9.3952e-11	5.3597e-11	2.5493e-11	5.4628e-11	5.5146e-11	6.939e-11	7.4799e-11	7.7705e-11	7.3529e-11	8.9668e-11	3.8486e-11	5.4767e-11	7.2877e-11	3.9173e-11	4.8232e-11	4.4253e-11	6.8888e-11	4.8936e-11
2024-05-29T18:21:53.641	4.51666e-09	1.21548e-09	4.84821e-10	4.33656e-10	1.9434e-10	1.14462e-10	1.41348e-10	9.4929e-11	1.0823e-10	8.703e-11	1.2059e-10	1.08243e-10	8.0373e-11	7.252e-11	4.4913e-11	9.4221e-11	8.5997e-11	2.7897e-11	8.5871e-11	9.8024e-11	5.1975e-11	4.6741e-11	8.1357e-11	6.0146e-11	5.0249e-11	8.7865e-11	1.20754e-10	7.1052e-11	8.1506e-11	4.39889e-10	6.1098e-11	9.5615e-11	5.9254e-11	7.4324e-11	8.1434e-11	9.191e-11	6.939e-11	4.5805e-11	1.0661e-10	5.3698e-11	4.2748e-11	5.0913e-11	7.9836e-11	3.3736e-11	0	2.7847e-11	3.9581e-11	3.41558e-10	6.9206e-11
2024-05-29T18:21:57.103	4.1321e-09	9.73184e-10	5.65373e-10	2.30262e-10	1.7884e-10	1.13123e-10	1.50975e-10	7.4605e-11	1.03417e-10	7.106e-11	9.3677e-11	7.2354e-11	8.7761e-11	9.6261e-11	5.7254e-11	8.1209e-11	1.05928e-10	9.5285e-11	4.2935e-11	4.30701e-10	4.6488e-11	9.201e-11	6.6428e-11	1.32393e-10	7.6757e-11	1.29885e-10	1.21956e-10	7.3112e-11	4.19577e-10	7.4296e-11	1.08725e-10	5.0219e-11	3.9949e-11	7.8574e-11	5.7583e-11	6.6277e-11	5.8645e-11	8.151e-11	6.7951e-11	7.3529e-11	5.7352e-11	4.7136e-11	6.9814e-11	4.7709e-11	3.3925e-11	3.9382e-11	5.9372e-11	4.8711e-11	2.8253e-11
2024-05-29T18:22:00.557	4.09774e-09	1.10797e-09	3.59595e-10	3.03927e-10	2.19033e-10	1.80559e-10	1.11272e-10	5.8699e-11	7.653e-11	1.24098e-10	7.427e-11	1.21276e-10	9.969e-11	9.4951e-11	6.5472e-11	1.09185e-10	6.3877e-11	5.8071e-11	4.46198e-10	7.1213e-11	8.052e-11	7.0112e-11	6.8472e-11	7.2713e-11	4.1028e-11	1.49342e-10	1.09348e-10	3.94473e-10	7.3725e-11	9.9061e-11	7.2721e-11	7.1021e-11	2.5266e-11	7.2105e-11	3.1539e-11	3.6764e-11	6.6866e-11	5.6099e-11	3.7692e-11	4.6504e-11	4.6828e-11	7.4528e-11	3.8726e-11	5.8432e-11	8.3098e-11	7.0996e-11	7.1356e-11	4.4467e-11	5.9934e-11
2024-05-29T18:22:04.014	4.06971e-09	8.30226e-10	4.32102e-10	3.05287e-10	1.66013e-10	1.37438e-10	1.2327e-10	6.7125e-11	1.10558e-10	5.5043e-11	5.9247e-11	1.24317e-10	1.33749e-10	1.01331e-10	8.2511e-11	7.638e-11	8.1428e-11	4.85059e-10	4.8684e-11	9.3851e-11	1.17377e-10	8.8992e-11	7.2388e-11	7.4601e-11	1.05935e-10	1.54054e-10	4.71097e-10	7.3112e-11	7.7713e-11	1.7512e-11	8.8187e-11	4.6976e-11	5.0532e-11	4.7693e-11	5.7583e-11	5.1992e-11	8.0837e-11	4.9475e-11	3.7692e-11	5.3698e-11	7.647e-11	5.0913e-11	5.4767e-11	7.0226e-11	6.4961e-11	1.9691e-11	3.4278e-11	5.2614e-11	3.9956e-11
2024-05-29T18:22:07.473	4.05646e-09	1.06431e-09	4.71553e-10	3.16607e-10	2.67306e-10	1.03267e-10	7.502e-11	8.4594e-11	4.222e-11	1.12355e-10	5.9247e-11	9.9858e-11	6.1047e-11	4.476e-11	4.4913e-11	5.7423e-11	4.81733e-10	9.3914e-11	5.6216e-11	1.12004e-10	9.5838e-11	9.0514e-11	7.9644e-11	1.02831e-10	7.8563e-11	1.20759e-10	1.36618e-10	1.1168e-10	4.915e-11	4.2895e-11	5.5775e-11	6.8765e-11	7.3662e-11	4.4155e-11	3.1539e-11	5.5146e-11	6.1508e-11	6.4778e-11	6.5285e-11	7.1036e-11	4.6828e-11	3.333e-11	3.8726e-11	4.7709e-11	3.9173e-11	5.9072e-11	4.4253e-11	8.8934e-11	5.6506e-11
2024-05-29T18:22:10.932	4.36042e-09	7.15272e-10	5.14451e-10	2.53386e-10	1.48716e-10	1.59026e-10	4.56328e-10	1.17398e-10	1.57165e-10	7.2814e-11	7.427e-11	7.2354e-11	8.7761e-11	7.9126e-11	7.9396e-11	4.75927e-10	1.24722e-10	8.369e-11	8.4323e-11	7.6629e-11	6.1498e-11	8.2627e-11	5.9877e-11	8.9832e-11	1.20784e-10	1.19569e-10	9.1964e-11	7.7067e-11	3.8856e-11	6.7822e-11	6.1098e-11	6.1506e-11	6.4416e-11	7.8574e-11	6.5654e-11	3.1839e-11	8.2937e-11	4.9475e-11	5.6539e-11	3.797e-11	7.1531e-11	2.32516e-10	4.3297e-11	3.3736e-11	8.7593e-11	2.7847e-11	4.8477e-11	5.2614e-11	5.2857e-11
2024-05-29T18:22:14.390	3.92315e-09	1.12828e-09	5.57841e-10	2.60639e-10	1.6805e-10	1.38536e-10	1.11272e-10	1.50095e-10	1.63517e-10	8.703e-11	9.7609e-11	8.3547e-11	1.13664e-10	6.7141e-11	2.2791e-10	7.2984e-11	1.07125e-10	6.6407e-11	5.1318e-11	1.0461e-10	7.8825e-11	5.4809e-11	5.5079e-11	4.17702e-10	7.8563e-11	1.17153e-10	1.15823e-10	9.7483e-11	4.5975e-11	2.4765e-11	8.4586e-11	7.1021e-11	4.13622e-10	8.455e-11	4.4603e-11	8.0125e-11	3.709e-11	6.202e-11	3.7692e-11	5.3698e-11	3.8235e-11	7.2001e-11	5.4767e-11	4.7709e-11	7.8346e-11	3.9382e-11	2.7988e-11	5.2614e-11	5.2857e-11
2024-05-29T18:22:17.852	4.43847e-09	9.66987e-10	4.73472e-10	2.72298e-10	1.98668e-10	8.3713e-11	1.06094e-10	7.8077e-11	8.2918e-11	1.1458e-10	1.1308e-10	9.7329e-11	7.722e-11	7.5895e-11	4.72925e-10	6.757e-11	1.25738e-10	6.6407e-11	5.6216e-11	6.7361e-11	7.5319e-11	7.3904e-11	1.6607e-11	4.50089e-10	8.8631e-11	1.17153e-10	1.02463e-10	7.7067e-11	7.5745e-11	3.9157e-11	2.4943e-11	3.9702e-11	8.3798e-11	6.7448e-11	8.3445e-11	4.1103e-11	6.6866e-11	2.6445e-11	4.2141e-11	7.1036e-11	8.5496e-11	8.6058e-11	2.7383e-11	7.7909e-11	8.3098e-11	3.4105e-11	5.2361e-11	4.4467e-11	7.2032e-11
2024-05-29T18:22:21.306	3.95392e-09	1.29271e-09	5.89442e-10	1.46764e-10	1.6291e-10	1.07602e-10	1.93458e-10	9.7681e-11	1.10558e-10	1.2101e-10	6.902e-11	1.13855e-10	1.03361e-10	7.7527e-11	5.2666e-11	9.4221e-11	1.07125e-10	8.0531e-11	8.8885e-11	9.3851e-11	1.35535e-10	8.2627e-11	4.6795e-10	4.7182e-11	1.31883e-10	1.38411e-10	1.37681e-10	5.7154e-11	3.8856e-11	7.2203e-11	3.9439e-11	4.29442e-10	2.5266e-11	6.2444e-11	6.3079e-11	4.8634e-11	5.8645e-11	6.4778e-11	5.9597e-11	4.2452e-11	5.058e-11	5.4428e-11	3.3538e-11	7.5435e-11	4.7977e-11	5.2097e-11	3.9581e-11	5.9659e-11	1.9978e-11
2024-05-29T18:22:24.765	4.06475e-09	1.14413e-09	5.32345e-10	3.91488e-10	1.59746e-10	1.36328e-10	1.15003e-10	1.37179e-10	1.38197e-10	7.9447e-11	9.0961e-11	6.6987e-11	3.1525e-11	1.03773e-10	5.7254e-11	8.4274e-11	9.1737e-11	5.0932e-11	3.975e-11	8.0037e-11	9.5838e-11	6.1833e-11	3.3214e-11	1.00088e-10	1.04602e-10	1.18367e-10	1.05271e-10	7.5115e-11	7.5745e-11	4.43361e-10	7.688e-11	7.7393e-11	6.6847e-11	8.455e-11	3.6418e-11	5.5146e-11	4.5426e-11	5.9134e-11	2.6653e-11	5.6956e-11	3.3112e-11	6.3822e-11	3.8726e-11	4.3553e-11	4.3797e-11	3.9382e-11	6.8557e-11	3.9773e-11	8.4759e-11
2024-05-29T18:22:28.223	3.95732e-09	1.37435e-09	5.46902e-10	2.2295e-10	2.07055e-10	1.39643e-10	1.31014e-10	8.7671e-11	1.15072e-10	9.9229e-11	5.4852e-11	9.9858e-11	1.57624e-10	9.7553e-11	8.4025e-11	7.8023e-11	6.5843e-11	3.9452e-11	4.8684e-11	7.8351e-11	9.8616e-11	1.08365e-10	4.6971e-11	8.827e-11	9.7667e-11	1.46441e-10	9.6603e-11	6.8931e-11	6.2654e-11	7.6332e-11	5.8497e-11	6.1506e-11	7.3662e-11	5.0986e-11	3.1539e-11	7.5791e-11	1.8545e-11	3.94914e-10	4.2141e-11	2.6849e-11	2.7036e-11	1.9243e-11	5.123e-11	7.7909e-11	7.062e-11	4.8232e-11	3.33518e-10	6.2886e-11	7.2032e-11
2024-05-29T18:22:31.682	3.88867e-09	7.25471e-10	4.09116e-10	2.50922e-10	1.83534e-10	1.20934e-10	1.2327e-10	1.31254e-10	1.18345e-10	1.02975e-10	4.86501e-10	1.02324e-10	7.5594e-11	8.8111e-11	7.6154e-11	7.9632e-11	7.6586e-11	4.2613e-11	6.691e-11	7.3063e-11	1.10256e-10	3.3051e-11	2.8764e-11	7.4601e-11	1.17248e-10	1.19569e-10	7.2453e-11	7.7067e-11	6.9508e-11	7.4296e-11	6.3593e-11	8.8776e-11	6.1889e-11	5.9786e-11	9.2849e-11	6.0966e-11	3.95583e-10	7.4799e-11	6.5285e-11	7.1036e-11	6.6225e-11	7.6973e-11	5.8089e-11	6.1593e-11	3.9173e-11	3.39916e-10	5.5976e-11	4.4467e-11	4.4672e-11
2024-05-29T18:22:35.143	3.95392e-09	1.13064e-09	6.08111e-10	2.19203e-10	1.73038e-10	1.13123e-10	1.20966e-10	1.37179e-10	1.07047e-10	8.8469e-11	9.3677e-11	6.8822e-11	7.8812e-11	6.5249e-11	5.0215e-11	8.1209e-11	8.4502e-11	4.5555e-11	4.59e-11	1.02027e-10	1.18522e-10	8.4264e-11	7.2388e-11	1.08108e-10	7.8563e-11	1.23104e-10	1.35535e-10	4.41707e-10	3.8856e-11	1.0211e-10	5.2912e-11	5.3266e-11	9.1098e-11	4.4155e-11	6.3079e-11	6.3677e-11	4.1468e-11	4.9475e-11	5.6539e-11	7.8278e-11	6.3405e-11	8.8183e-11	8.6594e-11	3.3736e-11	7.5857e-11	6.5307e-11	9.6954e-11	4.4467e-11	3.9956e-11
2024-05-29T18:22:38.619	3.71694e-09	1.05423e-09	4.33498e-10	2.85661e-10	2.03742e-10	8.9005e-11	9.9242e-11	1.27149e-10	8.1368e-11	5.2218e-10	7.0813e-11	7.7349e-11	1.11457e-10	5.7059e-11	9.2591e-11	8.7232e-11	6.9609e-11	7.3808e-11	5.3822e-11	1.09595e-10	8.5404e-11	7.2033e-11	4.9821e-11	6.0146e-11	1.07251e-10	1.01458e-10	1.35535e-10	2.9848e-11	1.01325e-10	4.6332e-11	5.2912e-11	3.9702e-11	6.6847e-11	6.7448e-11	6.5654e-11	3.51187e-10	6.1508e-11	4.5805e-11	4.9862e-11	6.0037e-11	9.1684e-11	3.333e-11	7.245e-11	8.9256e-11	3.45411e-10	0	4.8477e-11	4.8711e-11	4.8936e-11
2024-05-29T18:22:42.061	3.76195e-09	1.04276e-09	6.07116e-10	2.93528e-10	2.28163e-10	1.15786e-10	1.58255e-10	1.0921e-10	5.22232e-10	8.9884e-11	1.11966e-10	7.061e-11	1.06906e-10	5.9212e-11	4.4913e-11	8.4274e-11	1.22662e-10	6.6407e-11	9.18e-11	8.3305e-11	1.03951e-10	5.2258e-11	7.0457e-11	7.8243e-11	6.9061e-11	1.32066e-10	9.0364e-11	9.1187e-11	3.4754e-11	1.1213e-10	3.5275e-11	5.8887e-11	5.3597e-11	6.2444e-11	3.96861e-10	4.5026e-11	3.709e-11	4.1814e-11	6.5285e-11	5.3698e-11	0	5.0913e-11	6.422e-11	5.1532e-11	6.1938e-11	2.7847e-11	6.5638e-11	4.8711e-11	6.3176e-11
2024-05-29T18:22:45.519	3.29033e-09	7.31887e-10	5.99101e-10	3.17259e-10	1.80732e-10	1.41808e-10	1.29937e-10	5.63959e-10	5.7536e-11	8.703e-11	7.7572e-11	1.18153e-10	8.9166e-11	6.129e-11	7.2768e-11	8.2756e-11	9.7138e-11	1.03129e-10	5.6216e-11	7.8351e-11	6.1498e-11	5.7246e-11	9.2463e-11	9.8688e-11	1.09836e-10	1.34205e-10	9.8101e-11	8.2645e-11	6.9508e-11	3.0331e-11	4.6664e-11	7.3207e-11	4.3762e-11	7.2105e-11	4.4603e-11	8.2207e-11	3.709e-11	6.7423e-11	5.6539e-11	5.3698e-11	6.6225e-11	5.0913e-11	4.02918e-10	4.7709e-11	6.1938e-11	3.4105e-11	3.9581e-11	7.9545e-11	5.9934e-11
2024-05-29T18:22:48.973	3.87306e-09	1.26819e-09	5.94037e-10	2.4423e-10	1.61862e-10	1.2827e-10	1.0476e-10	1.4921e-10	1.3159e-10	1.15677e-10	6.5287e-11	1.02324e-10	7.8812e-11	7.5895e-11	8.8412e-11	7.2984e-11	8.2979e-11	6.0264e-11	3.975e-11	9.9377e-11	6.9732e-11	9.0514e-11	4.6971e-11	8.5059e-11	4.4316e-11	1.64814e-10	6.8309e-11	7.7067e-11	5.2131e-11	7.2203e-11	3.9439e-11	6.6434e-11	4.2278e-10	4.0308e-11	6.0393e-11	8.0125e-11	3.2121e-11	3.7399e-11	4.2141e-11	6.0037e-11	6.0454e-11	3.17366e-10	5.8089e-11	3.8955e-11	4.7977e-11	3.9382e-11	3.9581e-11	4.4467e-11	5.9934e-11
2024-05-29T18:22:52.431	5.23086e-09	9.73184e-10	4.17161e-10	2.54203e-10	2.50891e-10	1.03267e-10	1.1622e-10	9.9028e-11	1.27661e-10	9.7949e-11	1.0622e-10	4.9929e-11	1.26099e-10	7.9126e-11	4.53046e-10	1.06837e-10	7.4903e-11	4.5555e-11	8.114e-11	6.3274e-11	9.7237e-11	4.3722e-11	5.2516e-11	4.34678e-10	1.04602e-10	1.056e-10	1.09348e-10	5.4494e-11	6.2654e-11	2.4765e-11	5.8497e-11	5.8887e-11	4.3762e-11	4.4155e-11	7.7255e-11	6.8779e-11	5.2454e-11	7.4799e-11	5.9597e-11	4.2452e-11	6.6225e-11	8.1642e-11	4.7429e-11	6.4599e-11	6.7849e-11	5.2097e-11	6.5638e-11	4.4467e-11	1.03809e-10
2024-05-29T18:22:55.890	4.57737e-09	1.16842e-09	3.57066e-10	3.8347e-10	2.02065e-10	5.28294e-10	1.59141e-10	1.29209e-10	1.63517e-10	1.00494e-10	8.527e-11	9.07e-11	7.2232e-11	8.5221e-11	6.9216e-11	7.1225e-11	1.02254e-10	7.7242e-11	5.3822e-11	1.02027e-10	1.05242e-10	6.4002e-11	3.13339e-10	7.6444e-11	7.1063e-11	1.3633e-10	1.31172e-10	6.4479e-11	6.0196e-11	3.5023e-11	7.483e-11	3.95827e-10	6.9193e-11	7.6479e-11	5.4628e-11	4.5026e-11	3.709e-11	2.6445e-11	4.2141e-11	9.4926e-11	7.647e-11	5.0913e-11	2.7383e-11	4.7709e-11	5.5399e-11	4.403e-11	5.9372e-11	6.5955e-11	3.9956e-11
2024-05-29T18:22:59.348	3.6103e-09	1.00625e-09	5.89954e-10	2.89263e-10	4.75675e-10	1.52172e-10	1.26648e-10	1.27149e-10	1.07047e-10	8.2564e-11	6.5287e-11	7.4056e-11	1.24108e-10	4.187e-11	7.9396e-11	1.03214e-10	6.3877e-11	6.6407e-11	5.6216e-11	9.0963e-11	9.4418e-11	3.77924e-10	5.9877e-11	1.10652e-10	5.8023e-11	1.40462e-10	1.09348e-10	6.2133e-11	6.0196e-11	8.9293e-11	4.22196e-10	7.7393e-11	8.7524e-11	5.7004e-11	4.0717e-11	6.0966e-11	4.9066e-11	6.202e-11	4.6164e-11	5.023e-11	5.7352e-11	4.3029e-11	5.4767e-11	4.3553e-11	6.7849e-11	0	4.8477e-11	5.9659e-11	3.9956e-11
2024-05-29T18:23:02.807	4.12395e-09	1.09463e-09	5.36866e-10	2.37349e-10	1.96948e-10	1.04732e-10	8.218e-11	1.39097e-10	9.5746e-11	1.00494e-10	6.5287e-11	5.02472e-10	8.1904e-11	1.00087e-10	5.9415e-11	9.2866e-11	7.1417e-11	6.2378e-11	5.6216e-11	6.9314e-11	4.88955e-10	6.8136e-11	8.6292e-11	9.5827e-11	1.03252e-10	1.3633e-10	1.21956e-10	7.5115e-11	1.04263e-10	7.0047e-11	5.2912e-11	6.8765e-11	6.4416e-11	4.4155e-11	5.4628e-11	5.1992e-11	6.1508e-11	5.2891e-11	3.2643e-11	6.5767e-11	6.8929e-11	3.8486e-11	5.8089e-11	2.7545e-11	2.7699e-11	5.2097e-11	7.405e-11	7.7019e-11	5.6506e-11
2024-05-29T18:23:06.266	5.18821e-09	7.39151e-10	6.51292e-10	2.98426e-10	2.07875e-10	1.04732e-10	1.41348e-10	7.8077e-11	1.71869e-10	6.3558e-11	6.902e-11	1.02324e-10	1.251e-10	5.9212e-11	9.2591e-11	8.4274e-11	8.2979e-11	5.5793e-11	4.59e-11	1.15523e-10	6.1498e-11	6.1833e-11	4.9821e-11	9.8688e-11	8.7034e-11	1.25405e-10	1.19541e-10	5.1698e-11	3.34255e-10	4.9531e-11	9.4981e-11	9.0534e-11	7.5798e-11	4.4155e-11	6.5654e-11	7.7988e-11	6.1508e-11	3.73527e-10	3.2643e-11	5.6956e-11	3.3112e-11	5.7729e-11	3.3538e-11	2.7545e-11	7.3286e-11	1.9691e-11	3.41066e-10	4.8711e-11	3.4603e-11
2024-05-29T18:23:09.724	3.54257e-09	1.03311e-09	4.82948e-10	2.03525e-10	1.9434e-10	1.39643e-10	1.0065e-10	1.02964e-10	6.5795e-11	1.22049e-10	5.7091e-11	1.26311e-10	9.969e-11	5.7059e-11	6.5472e-11	1.06837e-10	8.8913e-11	5.5793e-11	8.114e-11	8.4892e-11	1.26247e-10	4.9576e-11	8.4679e-11	8.3407e-11	7.6757e-11	1.38411e-10	1.13278e-10	1.83994e-10	4.5975e-11	8.0249e-11	3.5275e-11	7.9404e-11	8.1871e-11	2.5493e-11	7.5079e-11	1.8382e-11	4.2452e-10	4.5805e-11	7.0516e-11	7.1036e-11	1.0471e-10	2.7214e-11	3.8726e-11	4.7709e-11	2.7699e-11	3.35322e-10	1.9791e-11	4.4467e-11	4.8936e-11
2024-05-29T18:23:13.181	4.81115e-09	1.14238e-09	5.50207e-10	2.95637e-10	2.15904e-10	1.87188e-10	1.29937e-10	1.04244e-10	5.7536e-11	4.87936e-10	7.7572e-11	8.2042e-11	9.5879e-11	8.223e-11	8.6974e-11	3.9011e-11	8.5997e-11	5.5793e-11	6.285e-11	9.3851e-11	1.06518e-10	4.3722e-11	4.0678e-11	7.8243e-11	1.46021e-10	1.09587e-10	1.03877e-10	8.787e-11	5.7633e-11	3.0331e-11	3.9439e-11	5.3266e-11	8.7524e-11	4.4155e-11	4.4603e-11	3.9167e-10	3.709e-11	5.2891e-11	5.6539e-11	6.0037e-11	5.058e-11	5.0913e-11	3.8726e-11	6.1593e-11	3.18242e-10	5.5694e-11	5.2361e-11	5.2614e-11	2.8253e-11
2024-05-29T18:23:16.642	3.59537e-09	8.4062e-10	6.56374e-10	3.30689e-10	2.02065e-10	1.72799e-10	1.0476e-10	1.6034e-10	8.444e-11	1.16763e-10	5.4852e-11	8.9315e-11	6.499e-11	8.3739e-11	9.1219e-11	9.8176e-11	4.64759e-10	5.8071e-11	1.0517e-10	6.3274e-11	7.8825e-11	4.9576e-11	7.2388e-11	1.15572e-10	7.6757e-11	9.7138e-11	1.26648e-10	8.2645e-11	3.4754e-11	5.2535e-11	5.8497e-11	5.8887e-11	5.9254e-11	8.0615e-11	5.1504e-11	4.8634e-11	8.0837e-11	4.1814e-11	4.9862e-11	7.1036e-11	6.3405e-11	7.6973e-11	3.3538e-11	4.3553e-11	6.4961e-11	3.4105e-11	1.9791e-11	4.8711e-11	7.4751e-11
2024-05-29T18:23:20.099	3.32898e-09	9.57966e-10	6.24291e-10	3.30689e-10	1.85379e-10	9.5607e-11	1.08714e-10	1.31254e-10	7.653e-11	1.31987e-10	7.427e-11	1.02324e-10	5.8978e-11	8.223e-11	6.15e-11	9.4221e-11	1.02254e-10	7.5544e-11	6.885e-11	1.16672e-10	1.05242e-10	9.201e-11	3.7134e-11	1.02831e-10	9.1742e-11	1.27665e-10	1.08006e-10	1.14308e-10	6.5019e-11	7.4296e-11	7.2721e-11	9.0534e-11	4.28405e-10	5.0986e-11	4.4603e-11	4.8634e-11	6.1508e-11	3.7399e-11	6.2506e-11	2.6849e-11	5.7352e-11	6.0852e-11	8.8732e-11	4.7709e-11	4.7977e-11	0	5.5976e-11	4.8711e-11	5.9934e-11
2024-05-29T18:23:23.562	3.55395e-09	8.60254e-10	5.10915e-10	2.66143e-10	1.9434e-10	1.04732e-10	1.03408e-10	1.33258e-10	1.11703e-10	8.9884e-11	4.7503e-11	1.29238e-10	8.9166e-11	4.80784e-10	6.9216e-11	1.14846e-10	1.30714e-10	5.0932e-11	7.2574e-11	9.0963e-11	8.6971e-11	5.7246e-11	3.8698e-10	6.4606e-11	1.00499e-10	1.3944e-10	1.37681e-10	9.4387e-11	5.2131e-11	4.9531e-11	3.0549e-11	1.0353e-10	6.1889e-11	5.4078e-11	6.8133e-11	4.5026e-11	6.6866e-11	3.7399e-11	4.9862e-11	6.5767e-11	6.3405e-11	6.3822e-11	3.3538e-11	4.7709e-11	5.5399e-11	3.9382e-11	2.7988e-11	7.9545e-11	4.8936e-11
2024-05-29T18:23:27.027	3.58975e-09	1.05739e-09	4.5459e-10	5.65858e-10	1.76927e-10	1.52172e-10	1.27754e-10	1.11611e-10	9.4407e-11	1.0659e-10	8.527e-11	8.6479e-11	1.14752e-10	5.9212e-11	8.2511e-11	1.11484e-10	9.3116e-11	8.5226e-11	6.4912e-11	1.27597e-10	7.3504e-11	7.5729e-11	7.7893e-11	9.4364e-11	4.4316e-11	1.08274e-10	1.38736e-10	9.1187e-11	1.0712e-10	4.11805e-10	4.6664e-11	7.7393e-11	6.9193e-11	3.1222e-11	7.2837e-11	6.3677e-11	5.5636e-11	9.535e-11	6.5285e-11	5.023e-11	5.4072e-11	4.7136e-11	5.4767e-11	8.0307e-11	6.1938e-11	6.2268e-11	5.2361e-11	4.8711e-11	7.9912e-11
2024-05-29T18:23:30.473	3.79757e-09	7.16205e-10	5.50207e-10	5.33453e-10	1.72052e-10	1.15786e-10	1.17425e-10	1.04244e-10	7.3127e-11	1.00494e-10	9.6316e-11	1.21276e-10	9.191e-11	8.8111e-11	6.737e-11	1.03214e-10	9.7138e-11	5.5793e-11	6.885e-11	8.6449e-11	4.7209e-10	5.9583e-11	4.9821e-11	7.0773e-11	8.5407e-11	1.2426e-10	1.37681e-10	8.2645e-11	9.3578e-11	1.64274e-10	4.9886e-11	5.6147e-11	8.1871e-11	5.0986e-11	4.8177e-11	6.8779e-11	6.1508e-11	7.7101e-11	3.7692e-11	7.3529e-11	5.4072e-11	3.333e-11	6.1231e-11	2.7545e-11	5.8759e-11	1.02316e-10	4.8477e-11	7.4408e-11	7.2032e-11
2024-05-29T18:23:33.932	3.92315e-09	7.07762e-10	5.98597e-10	3.24957e-10	2.11927e-10	1.01781e-10	1.43325e-10	1.27149e-10	1.42729e-10	1.12355e-10	7.427e-11	1.08243e-10	1.02152e-10	8.3739e-11	7.1014e-11	1.00727e-10	7.4903e-11	5.5793e-11	8.5871e-11	6.9314e-11	9.0024e-11	7.2033e-11	6.4318e-11	6.6726e-11	7.6757e-11	1.58626e-10	1.35535e-10	4.22463e-10	6.2654e-11	9.5916e-11	5.5775e-11	6.1506e-11	5.6496e-11	5.7004e-11	7.5079e-11	6.6277e-11	6.6866e-11	4.1814e-11	7.5385e-11	3.2883e-11	6.0454e-11	8.1642e-11	6.7075e-11	6.4599e-11	6.7849e-11	2.7847e-11	5.5976e-11	4.4467e-11	3.4603e-11
2024-05-29T18:23:37.393	3.61216e-09	1.06807e-09	6.51755e-10	2.84935e-10	2.11927e-10	1.20934e-10	1.06094e-10	1.06756e-10	1.27661e-10	6.3558e-11	8.8162e-11	8.6479e-11	8.3407e-11	6.898e-11	6.3517e-11	9.946e-11	1.00999e-10	5.5793e-11	8.8885e-11	7.1213e-11	9.0024e-11	9.3482e-11	6.4318e-11	5.0044e-11	6.9061e-11	9.2618e-11	1.47893e-10	3.58174e-10	8.6885e-11	7.4296e-11	4.9886e-11	5.3266e-11	5.0532e-11	3.6052e-11	9.9736e-11	4.1103e-11	4.12188e-10	4.5805e-11	6.7951e-11	6.5767e-11	4.6828e-11	7.6973e-11	5.4767e-11	5.1532e-11	5.1821e-11	3.53887e-10	4.8477e-11	6.8888e-11	6.626e-11
2024-05-29T18:23:40.855	4.2351e-09	1.27816e-09	4.98342e-10	2.63798e-10	2.41211e-10	1.5317e-10	1.1253e-10	1.31254e-10	9.027e-11	1.22049e-10	1.00145e-10	9.3408e-11	9.3252e-11	6.5249e-11	1.05331e-10	1.13737e-10	9.7138e-11	4.54695e-10	5.8511e-11	8.6449e-11	7.8825e-11	8.0958e-11	6.2137e-11	8.827e-11	7.1063e-11	1.47415e-10	8.8736e-11	4.2211e-11	7.3725e-11	4.9531e-11	4.9886e-11	5.6147e-11	5.3597e-11	5.0986e-11	6.3079e-11	6.8779e-11	6.939e-11	6.7423e-11	2.6653e-11	6.5767e-11	7.4041e-11	2.7214e-11	5.8089e-11	3.8955e-11	9.9872e-11	7.0996e-11	3.9581e-11	4.4467e-11	6.3176e-11
2024-05-29T18:23:44.308	4.48074e-09	1.2745e-09	5.87388e-10	2.11509e-10	1.53223e-10	1.24656e-10	1.35244e-10	1.39097e-10	5.07842e-10	7.7842e-11	1.3153e-10	9.604e-11	1.32816e-10	6.5249e-11	8.9827e-11	9.4221e-11	1.10639e-10	1.00583e-10	1.07645e-10	9.5263e-11	7.3504e-11	5.7246e-11	5.2516e-11	6.4606e-11	9.9093e-11	1.38411e-10	1.46904e-10	7.5115e-11	6.5019e-11	5.5377e-11	5.2912e-11	7.1021e-11	6.4416e-11	4.0308e-11	3.5543e-10	7.3528e-11	6.4243e-11	6.202e-11	7.9958e-11	4.6504e-11	8.7607e-11	6.3822e-11	6.1231e-11	6.7471e-11	5.8759e-11	4.403e-11	6.5638e-11	8.437e-11	3.4603e-11
2024-05-29T18:23:47.771	4.06806e-09	6.72933e-10	4.39726e-10	2.14427e-10	2.15114e-10	1.6093e-10	7.6873e-11	4.92187e-10	1.16173e-10	5.0247e-11	9.6316e-11	8.0508e-11	1.02152e-10	5.0044e-11	4.4913e-11	1.08017e-10	9.8441e-11	7.3808e-11	9.7368e-11	9.2418e-11	1.10256e-10	4.6741e-11	6.2137e-11	1.00088e-10	1.01885e-10	1.09587e-10	8.19e-11	8.2645e-11	6.2654e-11	5.808e-11	4.9886e-11	8.6983e-11	8.1871e-11	4.15385e-10	4.4603e-11	4.8634e-11	6.1508e-11	4.9475e-11	4.9862e-11	1.03986e-10	4.2748e-11	7.2001e-11	3.7795e-10	5.1532e-11	5.5399e-11	3.4105e-11	2.7988e-11	6.5955e-11	6.626e-11
2024-05-29T18:23:51.227	5.10976e-09	8.02408e-10	6.90033e-10	2.34716e-10	1.84459e-10	1.38536e-10	1.02038e-10	1.0799e-10	1.18345e-10	1.24098e-10	5.0073e-11	7.2354e-11	9.8436e-11	6.129e-11	9.1219e-11	4.65419e-10	8.2979e-11	7.0205e-11	6.885e-11	8.798e-11	1.32512e-10	6.1833e-11	5.2516e-11	7.8243e-11	3.94243e-10	1.19569e-10	9.1964e-11	7.7067e-11	3.8856e-11	6.7822e-11	6.8309e-11	4.6976e-11	6.9193e-11	3.6052e-11	6.8133e-11	6.3677e-11	6.6866e-11	6.7423e-11	5.6539e-11	3.797e-11	5.7352e-11	4.7136e-11	5.4767e-11	3.3736e-11	7.3286e-11	6.5307e-11	9.2826e-11	4.8711e-11	3.9956e-11
2024-05-29T18:23:54.683	3.81173e-09	1.04978e-09	6.45701e-10	2.3116e-10	2.24404e-10	1.01781e-10	1.07412e-10	1.06756e-10	8.444e-11	9.265e-11	1.01389e-10	7.061e-11	6.8707e-11	6.3301e-11	4.77171e-10	1.41556e-10	1.27755e-10	4.5555e-11	8.2747e-11	8.798e-11	7.8825e-11	6.4002e-11	5.9877e-11	4.38184e-10	8.7034e-11	1.04238e-10	1.18315e-10	8.9543e-11	6.7301e-11	8.579e-11	6.3593e-11	5.0219e-11	6.1889e-11	2.5493e-11	6.0393e-11	4.5026e-11	4.5426e-11	1.87e-11	5.3305e-11	6.0037e-11	6.3405e-11	5.7729e-11	4.7429e-11	7.2877e-11	3.9173e-11	5.9072e-11	3.4278e-11	1.03332e-10	6.626e-11
2024-05-29T18:23:58.145	4.22555e-09	6.22402e-10	5.69101e-10	1.83172e-10	1.56519e-10	1.00273e-10	1.15003e-10	9.7681e-11	9.7067e-11	7.9447e-11	7.9172e-11	1.09389e-10	7.3932e-11	1.02559e-10	4.70519e-10	9.5558e-11	8.2979e-11	6.2378e-11	7.4366e-11	1.29663e-10	7.3504e-11	7.9253e-11	3.7134e-11	1.27042e-10	6.0392e-11	1.49342e-10	9.5082e-11	8.4422e-11	6.7301e-11	7.0047e-11	6.5993e-11	3.0753e-11	5.3597e-11	8.455e-11	4.4603e-11	4.1103e-11	7.8681e-11	5.9134e-11	7.7705e-11	7.5941e-11	2.262e-10	3.8486e-11	4.3297e-11	5.1532e-11	6.7849e-11	0	4.4253e-11	6.5955e-11	6.9206e-11
2024-05-29T18:24:01.598	3.7115e-09	8.27002e-10	4.21484e-10	2.96337e-10	1.80732e-10	9.8742e-11	9.9242e-11	1.13961e-10	1.03417e-10	1.13473e-10	1.25671e-10	8.6479e-11	8.4883e-11	4.61922e-10	7.6154e-11	1.22332e-10	6.7752e-11	5.0932e-11	8.4323e-11	9.5263e-11	9.4418e-11	6.8136e-11	3.77602e-10	7.2713e-11	9.02e-11	1.2426e-10	8.3661e-11	9.2801e-11	8.3338e-11	6.3139e-11	7.055e-11	8.3279e-11	6.1889e-11	3.6052e-11	3.6418e-11	6.0966e-11	4.9066e-11	5.6099e-11	6.2506e-11	7.8278e-11	7.4041e-11	5.0913e-11	3.3538e-11	5.1532e-11	5.5399e-11	5.9072e-11	6.2584e-11	6.2886e-11	4.8936e-11
2024-05-29T18:24:05.057	4.34185e-09	7.22703e-10	5.26639e-10	2.86385e-10	1.6805e-10	1.23428e-10	1.22124e-10	1.35233e-10	1.00925e-10	7.7842e-11	9.6316e-11	1.24317e-10	4.5711e-10	7.252e-11	1.16688e-10	9.0093e-11	6.9609e-11	6.8332e-11	5.8511e-11	1.18938e-10	8.8511e-11	4.49238e-10	9.096e-11	1.65978e-10	1.03252e-10	1.45462e-10	1.15823e-10	8.4422e-11	4.5975e-11	3.0331e-11	3.9439e-11	9.2259e-11	4.3762e-11	5.7004e-11	6.0393e-11	7.1193e-11	8.894e-11	1.87e-11	4.6164e-11	4.6504e-11	3.8235e-11	2.7214e-11	5.8089e-11	6.1593e-11	5.1821e-11	4.8232e-11	6.2584e-11	4.8711e-11	5.6506e-11
2024-05-29T18:24:08.515	3.96751e-09	1.0155e-09	4.89164e-10	3.21783e-10	2.06231e-10	1.23428e-10	9.7814e-11	1.50976e-10	1.37273e-10	7.9447e-11	5.7091e-11	6.3156e-11	6.1047e-11	5.7059e-11	8.6974e-11	9.4221e-11	9.1737e-11	7.5544e-11	8.5871e-11	7.3063e-11	7.5319e-11	7.5729e-11	5.7528e-11	8.1722e-11	7.3011e-11	1.2426e-10	1.20754e-10	7.1052e-11	4.06787e-10	3.9157e-11	8.6406e-11	6.6434e-11	6.6847e-11	0	5.1504e-11	1.00682e-10	4.5426e-11	3.73995e-10	5.3305e-11	1.8985e-11	4.6828e-11	7.4528e-11	5.123e-11	5.1532e-11	4.7977e-11	3.4105e-11	3.38183e-10	3.9773e-11	6.626e-11
2024-05-29T18:24:11.979	5.31386e-09	7.69261e-10	4.67693e-10	2.22019e-10	2.25161e-10	1.00273e-10	1.11272e-10	6.7125e-11	1.12838e-10	1.01742e-10	5.9247e-11	7.2354e-11	6.305e-11	7.252e-11	5.7254e-11	1.01978e-10	6.5843e-11	5.3418e-11	6.285e-11	8.6449e-11	8.6971e-11	7.2033e-11	6.4318e-11	5.5326e-11	5.0249e-11	1.50296e-10	6.1573e-11	4.36636e-10	7.7713e-11	8.2137e-11	5.8497e-11	8.6983e-11	6.1889e-11	4.0308e-11	5.4628e-11	5.8129e-11	6.939e-11	7.4799e-11	1.8846e-11	3.797e-11	6.3405e-11	4.3029e-11	3.8726e-11	4.3553e-11	5.1821e-11	3.54981e-10	6.2584e-11	3.9773e-11	5.9934e-11
2024-05-29T18:24:15.432	4.18553e-09	1.29064e-09	4.00911e-10	2.89978e-10	1.86294e-10	1.54161e-10	6.9165e-11	1.13961e-10	1.23606e-10	1.05399e-10	1.14183e-10	7.7349e-11	9.969e-11	8.9521e-11	4.7638e-11	9.6876e-11	1.07125e-10	7.3808e-11	6.4912e-11	7.3063e-11	7.8825e-11	9.6359e-11	5.7528e-11	7.2713e-11	9.4751e-11	1.21937e-10	1.2893e-10	2.4371e-11	8.513e-11	3.0331e-11	8.2727e-11	8.3279e-11	7.3662e-11	7.6479e-11	7.2837e-11	4.25574e-10	5.5636e-11	4.9475e-11	5.3305e-11	0	4.2748e-11	5.4428e-11	3.8726e-11	7.7909e-11	3.64855e-10	6.2268e-11	6.5638e-11	6.5955e-11	2.8253e-11
2024-05-29T18:24:18.890	3.91971e-09	1.07493e-09	6.47103e-10	2.3116e-10	1.18111e-10	1.4394e-10	8.3875e-11	1.46521e-10	4.96991e-10	7.106e-11	1.11966e-10	9.2064e-11	1.02152e-10	9.3623e-11	2.2457e-11	1.12616e-10	7.1417e-11	1.19446e-10	4.59e-11	7.3063e-11	8.5404e-11	6.6102e-11	4.6971e-11	7.4601e-11	9.02e-11	1.53123e-10	1.03877e-10	2.9848e-11	7.1648e-11	2.4765e-11	1.7637e-11	8.3279e-11	5.3597e-11	5.7004e-11	3.49314e-10	4.5026e-11	7.6464e-11	7.2423e-11	4.9862e-11	6.2967e-11	6.8929e-11	3.8486e-11	8.4401e-11	3.8955e-11	5.1821e-11	5.5694e-11	5.5976e-11	6.5955e-11	3.4603e-11
2024-05-29T18:24:22.348	4.16133e-09	7.83029e-10	4.27886e-10	3.42986e-10	1.10675e-10	1.61874e-10	9.9242e-11	4.82946e-10	1.12838e-10	9.9229e-11	1.1743e-10	1.01098e-10	9.191e-11	7.7527e-11	4.4913e-11	7.638e-11	7.1417e-11	8.369e-11	6.691e-11	7.6629e-11	4.3486e-11	6.6102e-11	4.6971e-11	9.5827e-11	5.8023e-11	1.35277e-10	1.34461e-10	4.2211e-11	8.6885e-11	6.3139e-11	4.9886e-11	2.511e-11	6.4416e-11	6.7448e-11	2.5752e-11	6.3677e-11	4.1468e-11	7.7101e-11	4.9862e-11	4.2452e-11	9.3656e-11	6.666e-11	3.45834e-10	6.1593e-11	7.8346e-11	4.8232e-11	5.9372e-11	6.2886e-11	9.7872e-11
2024-05-29T18:24:25.814	4.67632e-09	1.2608e-09	5.27785e-10	2.32054e-10	2.22883e-10	1.49138e-10	8.045e-11	1.25049e-10	1.2153e-10	1.00494e-10	9.6316e-11	9.07e-11	1.21073e-10	7.4227e-11	7.2768e-11	4.41363e-10	1.24722e-10	1.01864e-10	4.8684e-11	9.8024e-11	9.4418e-11	5.9583e-11	8.1357e-11	7.6444e-11	4.45052e-10	9.7138e-11	1.03877e-10	8.9543e-11	8.1506e-11	7.2203e-11	6.5993e-11	5.0219e-11	6.9193e-11	7.6479e-11	9.6354e-11	5.8129e-11	7.6464e-11	3.7399e-11	6.2506e-11	8.7001e-11	4.2748e-11	1.9243e-11	4.7429e-11	5.1532e-11	4.7977e-11	4.403e-11	5.5976e-11	5.9659e-11	4.8936e-11
2024-05-29T18:24:29.266	4.08952e-09	6.62933e-10	5.40232e-10	2.15391e-10	1.67035e-10	9.5607e-11	1.17425e-10	1.69188e-10	1.35405e-10	8.703e-11	1.09703e-10	8.3547e-11	6.8707e-11	9.6261e-11	3.50065e-10	1.06837e-10	9.9728e-11	7.8904e-11	9.18e-11	4.3225e-11	4.9308e-11	4.6741e-11	7.6102e-11	4.25948e-10	7.4907e-11	1.62191e-10	1.23146e-10	5.1698e-11	3.4754e-11	3.9157e-11	5.8497e-11	3.9702e-11	4.1708e-10	8.645e-11	4.4603e-11	6.8779e-11	2.6227e-11	2.6445e-11	4.2141e-11	6.2967e-11	6.8929e-11	7.6973e-11	8.215e-11	5.1532e-11	6.1938e-11	5.2097e-11	6.5638e-11	5.9659e-11	5.9934e-11
2024-05-29T18:24:32.723	3.41681e-09	9.05641e-10	6.31986e-10	2.92821e-10	1.59746e-10	4.89994e-10	9.6365e-11	1.18521e-10	1.40934e-10	1.01742e-10	8.3787e-11	9.4733e-11	7.0492e-11	8.223e-11	5.7254e-11	9.946e-11	1.15156e-10	7.3808e-11	7.0736e-11	1.07132e-10	9.2976e-11	6.4002e-11	4.15505e-10	9.2878e-11	6.4871e-11	1.3633e-10	8.7077e-11	6.6741e-11	7.5745e-11	5.2535e-11	5.8497e-11	3.77064e-10	6.1889e-11	5.9786e-11	4.4603e-11	3.6764e-11	7.1825e-11	5.6099e-11	1.08263e-10	6.0037e-11	6.3405e-11	5.4428e-11	4.3297e-11	5.1532e-11	6.7849e-11	4.8232e-11	3.4278e-11	4.4467e-11	4.4672e-11
2024-05-29T18:24:36.182	4.35579e-09	1.03891e-09	4.94692e-10	2.76824e-10	1.26459e-10	4.96481e-10	1.22124e-10	1.21829e-10	9.5746e-11	9.5337e-11	9.8885e-11	1.10522e-10	1.10337e-10	7.4227e-11	5.5007e-11	5.2822e-11	8.4502e-11	6.4424e-11	8.2747e-11	9.5263e-11	7.1643e-11	6.1833e-11	3.21592e-10	1.01469e-10	1.07251e-10	1.2878e-10	1.14558e-10	4.5593e-11	8.3338e-11	8.579e-11	7.2721e-11	4.17154e-10	7.1463e-11	7.6479e-11	9.1046e-11	7.3528e-11	4.9066e-11	2.6445e-11	4.9862e-11	6.5767e-11	6.0454e-11	7.4528e-11	4.7429e-11	4.3553e-11	4.3797e-11	5.5694e-11	5.9372e-11	5.6247e-11	8.9344e-11
2024-05-29T18:24:39.641	3.42468e-09	8.4774e-10	4.98342e-10	3.44192e-10	1.92581e-10	1.38536e-10	1.31014e-10	1.3226e-10	8.2918e-11	1.30061e-10	4.4786e-11	9.8602e-11	7.0492e-11	8.9521e-11	6.737e-11	7.4701e-11	1.11785e-10	7.3808e-11	4.8684e-11	7.8351e-11	7.7092e-11	6.8136e-11	8.7876e-11	5.5326e-11	6.2672e-11	1.3098e-10	1.08006e-10	7.897e-11	4.5975e-11	4.2895e-11	4.6664e-11	6.4017e-11	4.7268e-11	5.4078e-11	5.4628e-11	4.5026e-11	6.1508e-11	5.6099e-11	3.99788e-10	0	5.7352e-11	7.4528e-11	5.123e-11	5.8432e-11	4.3797e-11	1.9691e-11	6.5638e-11	3.78885e-10	3.9956e-11
2024-05-29T18:24:43.099	3.98783e-09	1.14121e-09	4.62497e-10	2.13459e-10	2.25161e-10	9.0701e-11	1.40349e-10	7.4605e-11	1.05851e-10	6.3558e-11	1.05033e-10	1.02324e-10	6.499e-11	1.0964e-10	7.6154e-11	7.638e-11	9.8441e-11	7.5544e-11	5.6216e-11	6.7361e-11	6.7768e-11	6.6102e-11	9.3943e-11	6.2416e-11	9.622e-11	1.08274e-10	8.7077e-11	6.8931e-11	5.2131e-11	6.5523e-11	5.5775e-11	7.9404e-11	3.5731e-11	6.4994e-11	5.1504e-11	4.8634e-11	5.5636e-11	3.90462e-10	7.5385e-11	4.2452e-11	5.7352e-11	6.666e-11	4.3297e-11	7.5435e-11	5.8759e-11	2.7847e-11	3.87311e-10	3.9773e-11	8.9344e-11
2024-05-29T18:24:46.556	3.72779e-09	1.0201e-09	5.54037e-10	3.93072e-10	2.12728e-10	1.92009e-10	8.5536e-11	8.7671e-11	1.00925e-10	9.5337e-11	4.79495e-10	7.7349e-11	7.722e-11	9.0909e-11	5.9415e-11	8.2756e-11	9.9728e-11	7.5544e-11	4.59e-11	9.8024e-11	7.1643e-11	8.8992e-11	5.9877e-11	7.4601e-11	9.1742e-11	1.55899e-10	9.3536e-11	7.7067e-11	4.915e-11	5.2535e-11	4.9886e-11	6.6434e-11	6.4416e-11	4.7693e-11	5.4628e-11	5.1992e-11	4.1963e-10	5.2891e-11	7.5385e-11	3.2883e-11	5.4072e-11	5.4428e-11	6.9814e-11	8.0307e-11	7.5857e-11	3.60401e-10	4.8477e-11	7.1701e-11	4.4672e-11
2024-05-29T18:24:50.020	4.4324e-09	1.38644e-09	5.02568e-10	1.61529e-10	1.30432e-10	1.44995e-10	1.13773e-10	1.44701e-10	1.0823e-10	6.926e-11	1.26675e-10	6.8822e-11	5.8978e-11	9.0909e-11	9.659e-11	7.1225e-11	6.5843e-11	9.6637e-11	7.2574e-11	9.3851e-11	6.3656e-11	7.0112e-11	4.6971e-11	9.1368e-11	9.3259e-11	1.02857e-10	2.18695e-10	7.897e-11	8.513e-11	4.6332e-11	7.2721e-11	9.7249e-11	6.6847e-11	5.4078e-11	6.5654e-11	4.17963e-10	4.1468e-11	5.2891e-11	3.7692e-11	6.2967e-11	7.8823e-11	5.7729e-11	5.4767e-11	5.8432e-11	3.7111e-10	5.5694e-11	3.9581e-11	6.8888e-11	2.8253e-11
2024-05-29T18:24:53.528	4.09281e-09	9.17365e-10	4.95302e-10	3.66345e-10	2.22883e-10	1.22187e-10	1.472e-10	1.61165e-10	5.30936e-10	8.5567e-11	9.0961e-11	1.40335e-10	1.02152e-10	8.5221e-11	6.15e-11	1.03214e-10	8.8913e-11	6.8332e-11	3.6287e-11	4.9012e-11	1.11475e-10	6.8136e-11	6.6428e-11	1.02831e-10	8.5407e-11	1.32066e-10	1.18315e-10	8.787e-11	1.05701e-10	3.9157e-11	2.4943e-11	7.1021e-11	8.3798e-11	4.0308e-11	3.76275e-10	4.1103e-11	6.6866e-11	9.3499e-11	6.7951e-11	1.8985e-11	6.0454e-11	6.666e-11	8.4401e-11	3.9726e-10	3.9173e-11	6.2268e-11	1.9791e-11	4.8711e-11	9.989e-11
[truncated: 41 more rows]
[truncated: 1,951 more columns]
