# Supplementary material for: Geomagnetic and visual cues guide seasonal migratory orientation in the nocturnal fall armyworm, the world’s most invasive insect
Source: eLife. 2026 Apr 16;14:RP109098. doi: 10.7554/eLife.109098 (PMC13086496; doi:10.7554/eLife.109098)
Supplement: Figure 2—figure supplement 2—source data 1. [file elife-109098-fig2-figsupp2-data1.xlsx]

## Sheet: Sheet1
dir	rbar	Stage	Experiment	Year
232.46	0.0132835	I	Fall Exp.Group (Field-captured)	2023
173.631	0.0127899	II	Fall Exp.Group (Field-captured)	2023
216.861	0.0161838	III	Fall Exp.Group (Field-captured)	2023
265.137	0.0472489	IV	Fall Exp.Group (Field-captured)	2023
78.2407	0.0308571	V	Fall Exp.Group (Field-captured)	2023
244.958	0.494559	I	Fall Exp.Group (Field-captured)	2023
316.814	0.694548	II	Fall Exp.Group (Field-captured)	2023
327.308	0.719299	III	Fall Exp.Group (Field-captured)	2023
210.726	0.284042	IV	Fall Exp.Group (Field-captured)	2023
182.21	0.407069	V	Fall Exp.Group (Field-captured)	2023
120.232	0.685279	I	Fall Exp.Group (Field-captured)	2023
168.518	0.738527	II	Fall Exp.Group (Field-captured)	2023
24.1755	0.0818169	III	Fall Exp.Group (Field-captured)	2023
199.498	0.051497	IV	Fall Exp.Group (Field-captured)	2023
223.317	0.039996	V	Fall Exp.Group (Field-captured)	2023
131.291	0.222212	I	Fall Exp.Group (Field-captured)	2023
186.922	0.914016	II	Fall Exp.Group (Field-captured)	2023
188.391	0.657369	III	Fall Exp.Group (Field-captured)	2023
213.731	0.527897	IV	Fall Exp.Group (Field-captured)	2023
178.722	0.996328	V	Fall Exp.Group (Field-captured)	2023
169.86	0.369659	I	Fall Exp.Group (Field-captured)	2023
234.645	0.221788	II	Fall Exp.Group (Field-captured)	2023
285.201	0.035242	III	Fall Exp.Group (Field-captured)	2023
206.579	0.061089	IV	Fall Exp.Group (Field-captured)	2023
35.2944	0.0106994	V	Fall Exp.Group (Field-captured)	2023
173.572	0.141301	I	Fall Exp.Group (Field-captured)	2023
117.23	0.0766125	II	Fall Exp.Group (Field-captured)	2023
165.743	0.250015	III	Fall Exp.Group (Field-captured)	2023
180.24	0.830442	IV	Fall Exp.Group (Field-captured)	2023
187.173	0.605214	V	Fall Exp.Group (Field-captured)	2023
128.585	0.427265	I	Fall Exp.Group (Field-captured)	2023
110.488	0.235864	II	Fall Exp.Group (Field-captured)	2023
229.382	0.0259201	III	Fall Exp.Group (Field-captured)	2023
225.101	0.0825318	IV	Fall Exp.Group (Field-captured)	2023
170.653	0.100258	V	Fall Exp.Group (Field-captured)	2023
209.018	0.380722	I	Fall Exp.Group (Field-captured)	2023
212.124	0.0775288	II	Fall Exp.Group (Field-captured)	2023
271.717	0.0257705	III	Fall Exp.Group (Field-captured)	2023
292.779	0.0145695	IV	Fall Exp.Group (Field-captured)	2023
358.334	0.336014	V	Fall Exp.Group (Field-captured)	2023
201.074	0.973657	I	Fall Exp.Group (Field-captured)	2023
251.521	0.925329	II	Fall Exp.Group (Field-captured)	2023
235.463	0.274008	III	Fall Exp.Group (Field-captured)	2023
319.23	0.999941	IV	Fall Exp.Group (Field-captured)	2023
169.999	0.999145	V	Fall Exp.Group (Field-captured)	2023
180.158	0.665533	I	Fall Exp.Group (Field-captured)	2023
191.22	0.527465	II	Fall Exp.Group (Field-captured)	2023
202.167	0.301919	III	Fall Exp.Group (Field-captured)	2023
239.931	0.0235617	IV	Fall Exp.Group (Field-captured)	2023
259.854	0.0374252	V	Fall Exp.Group (Field-captured)	2023
280.543	0.67049	I	Fall Exp.Group (Field-captured)	2023
157.423	0.0263196	II	Fall Exp.Group (Field-captured)	2023
321.088	0.348922	III	Fall Exp.Group (Field-captured)	2023
349.812	0.0780795	IV	Fall Exp.Group (Field-captured)	2023
95.6353	0.141622	V	Fall Exp.Group (Field-captured)	2023
125.033	0.274245	I	Fall Exp.Group (Field-captured)	2023
258.861	0.111501	II	Fall Exp.Group (Field-captured)	2023
179.177	0.138204	III	Fall Exp.Group (Field-captured)	2023
116.007	0.333292	IV	Fall Exp.Group (Field-captured)	2023
193.53	0.202262	V	Fall Exp.Group (Field-captured)	2023
13.858	0.0287267	I	Fall Exp.Group (Field-captured)	2023
24.1168	0.0949807	II	Fall Exp.Group (Field-captured)	2023
55.5501	0.382815	III	Fall Exp.Group (Field-captured)	2023
0.252076	0.163709	IV	Fall Exp.Group (Field-captured)	2023
12.0126	0.0967223	V	Fall Exp.Group (Field-captured)	2023
206.923	0.241892	I	Fall Exp.Group (Field-captured)	2023
211.344	0.0981641	II	Fall Exp.Group (Field-captured)	2023
225.678	0.0698021	III	Fall Exp.Group (Field-captured)	2023
345.021	0.113682	IV	Fall Exp.Group (Field-captured)	2023
341.536	0.369918	V	Fall Exp.Group (Field-captured)	2023
166.485	0.651821	I	Fall Exp.Group (Field-captured)	2023
9.42836	0.010947	II	Fall Exp.Group (Field-captured)	2023
19.9985	0.0554625	III	Fall Exp.Group (Field-captured)	2023
204.961	0.0180248	IV	Fall Exp.Group (Field-captured)	2023
189.032	0.01587	V	Fall Exp.Group (Field-captured)	2023
230.657	0.22554	I	Fall Exp.Group (Field-captured)	2023
203.274	0.228787	II	Fall Exp.Group (Field-captured)	2023
182.709	0.390803	III	Fall Exp.Group (Field-captured)	2023
186.428	0.322571	IV	Fall Exp.Group (Field-captured)	2023
206.297	0.345133	V	Fall Exp.Group (Field-captured)	2023
175.096	0.994051	I	Fall Exp.Group (Field-captured)	2023
165.268	0.982612	II	Fall Exp.Group (Field-captured)	2023
203.524	0.313961	III	Fall Exp.Group (Field-captured)	2023
152.89	0.844938	IV	Fall Exp.Group (Field-captured)	2023
190.056	0.647773	V	Fall Exp.Group (Field-captured)	2023
140.521	0.122165	I	Fall Exp.Group (Field-captured)	2023
233.59	0.612032	II	Fall Exp.Group (Field-captured)	2023
142.785	0.280372	III	Fall Exp.Group (Field-captured)	2023
189.078	0.821014	IV	Fall Exp.Group (Field-captured)	2023
162.221	0.24965	V	Fall Exp.Group (Field-captured)	2023
139.896	0.659411	I	Fall Exp.Group (Field-captured)	2024
87.9026	0.117402	II	Fall Exp.Group (Field-captured)	2024
166.185	0.255248	III	Fall Exp.Group (Field-captured)	2024
123.143	0.913465	IV	Fall Exp.Group (Field-captured)	2024
126.656	0.863906	V	Fall Exp.Group (Field-captured)	2024
104.918	0.122564	I	Fall Exp.Group (Field-captured)	2024
62.1975	0.255728	II	Fall Exp.Group (Field-captured)	2024
103.443	0.805322	III	Fall Exp.Group (Field-captured)	2024
161.569	0.920455	IV	Fall Exp.Group (Field-captured)	2024
108.534	0.839017	V	Fall Exp.Group (Field-captured)	2024
235.028	0.237814	I	Fall Exp.Group (Field-captured)	2024
247.054	0.413307	II	Fall Exp.Group (Field-captured)	2024
202.632	0.551492	III	Fall Exp.Group (Field-captured)	2024
240.178	0.109191	IV	Fall Exp.Group (Field-captured)	2024
250.263	0.473735	V	Fall Exp.Group (Field-captured)	2024
173.494	0.234061	I	Fall Exp.Group (Field-captured)	2024
146.568	0.436792	II	Fall Exp.Group (Field-captured)	2024
289.257	0.397936	III	Fall Exp.Group (Field-captured)	2024
112.675	0.280553	IV	Fall Exp.Group (Field-captured)	2024
168.441	0.430928	V	Fall Exp.Group (Field-captured)	2024
226.579	0.191924	I	Fall Exp.Group (Field-captured)	2024
29.5632	0.136437	II	Fall Exp.Group (Field-captured)	2024
38.46	0.139644	III	Fall Exp.Group (Field-captured)	2024
164.574	0.4261	IV	Fall Exp.Group (Field-captured)	2024
163.381	0.275432	V	Fall Exp.Group (Field-captured)	2024
272.206	0.0201522	I	Fall Exp.Group (Field-captured)	2024
321.222	0.443686	II	Fall Exp.Group (Field-captured)	2024
351.294	0.575235	III	Fall Exp.Group (Field-captured)	2024
112.166	0.345815	IV	Fall Exp.Group (Field-captured)	2024
106.463	0.104563	V	Fall Exp.Group (Field-captured)	2024
229.709	0.28518	I	Fall Exp.Group (Field-captured)	2024
129.792	0.591717	II	Fall Exp.Group (Field-captured)	2024
116.987	0.40084	III	Fall Exp.Group (Field-captured)	2024
145.238	0.765179	IV	Fall Exp.Group (Field-captured)	2024
131.878	0.564842	V	Fall Exp.Group (Field-captured)	2024
311.121	0.453289	I	Fall Exp.Group (Field-captured)	2024
250.069	0.350771	II	Fall Exp.Group (Field-captured)	2024
293.184	0.121789	III	Fall Exp.Group (Field-captured)	2024
262.098	0.392555	IV	Fall Exp.Group (Field-captured)	2024
263.35	0.0479094	V	Fall Exp.Group (Field-captured)	2024
131.081	0.771727	I	Fall Exp.Group (Field-captured)	2024
163.611	0.961203	II	Fall Exp.Group (Field-captured)	2024
105.55	0.74039	III	Fall Exp.Group (Field-captured)	2024
175.679	0.208494	IV	Fall Exp.Group (Field-captured)	2024
151.442	0.797973	V	Fall Exp.Group (Field-captured)	2024
262.141	0.179534	I	Fall Exp.Group (Field-captured)	2024
206.776	0.111221	II	Fall Exp.Group (Field-captured)	2024
1.3533	0.0724307	III	Fall Exp.Group (Field-captured)	2024
111.934	0.325246	IV	Fall Exp.Group (Field-captured)	2024
293.716	0.124028	V	Fall Exp.Group (Field-captured)	2024
180.422	0.440097	I	Fall Exp.Group (Field-captured)	2024
69.0832	0.2512	II	Fall Exp.Group (Field-captured)	2024
25.8097	0.614905	III	Fall Exp.Group (Field-captured)	2024
194.811	0.791222	IV	Fall Exp.Group (Field-captured)	2024
165.349	0.11849	V	Fall Exp.Group (Field-captured)	2024
