# Supplementary material for: Geomagnetic and visual cues guide seasonal migratory orientation in the nocturnal fall armyworm, the world’s most invasive insect
Source: eLife. 2026 Apr 16;14:RP109098. doi: 10.7554/eLife.109098 (PMC13086496; doi:10.7554/eLife.109098)
Supplement: Figure 2—source data 1. [file elife-109098-fig2-data1.xlsx]

## Sheet: Sheet1
dir	rbar	Stage	Experiment
78.2407	0.0308571	V	Fall Exp.Group (Field-captured)
182.21	0.407069	V	Fall Exp.Group (Field-captured)
223.317	0.039996	V	Fall Exp.Group (Field-captured)
178.722	0.996328	V	Fall Exp.Group (Field-captured)
35.2944	0.0106994	V	Fall Exp.Group (Field-captured)
187.173	0.605214	V	Fall Exp.Group (Field-captured)
170.653	0.100258	V	Fall Exp.Group (Field-captured)
358.334	0.336014	V	Fall Exp.Group (Field-captured)
169.999	0.999145	V	Fall Exp.Group (Field-captured)
259.854	0.0374252	V	Fall Exp.Group (Field-captured)
95.6353	0.141622	V	Fall Exp.Group (Field-captured)
193.53	0.202262	V	Fall Exp.Group (Field-captured)
12.0126	0.0967223	V	Fall Exp.Group (Field-captured)
341.536	0.369918	V	Fall Exp.Group (Field-captured)
189.032	0.01587	V	Fall Exp.Group (Field-captured)
206.297	0.345133	V	Fall Exp.Group (Field-captured)
190.056	0.647773	V	Fall Exp.Group (Field-captured)
162.221	0.24965	V	Fall Exp.Group (Field-captured)
126.656	0.863906	V	Fall Exp.Group (Field-captured)
108.534	0.839017	V	Fall Exp.Group (Field-captured)
250.263	0.473735	V	Fall Exp.Group (Field-captured)
168.441	0.430928	V	Fall Exp.Group (Field-captured)
163.381	0.275432	V	Fall Exp.Group (Field-captured)
106.463	0.104563	V	Fall Exp.Group (Field-captured)
131.878	0.564842	V	Fall Exp.Group (Field-captured)
263.35	0.0479094	V	Fall Exp.Group (Field-captured)
151.442	0.797973	V	Fall Exp.Group (Field-captured)
293.716	0.124028	V	Fall Exp.Group (Field-captured)
165.349	0.11849	V	Fall Exp.Group (Field-captured)
265.137	0.0472489	IV	Fall Exp.Group (Field-captured)
210.726	0.284042	IV	Fall Exp.Group (Field-captured)
199.498	0.051497	IV	Fall Exp.Group (Field-captured)
213.731	0.527897	IV	Fall Exp.Group (Field-captured)
206.579	0.061089	IV	Fall Exp.Group (Field-captured)
180.24	0.830442	IV	Fall Exp.Group (Field-captured)
225.101	0.0825318	IV	Fall Exp.Group (Field-captured)
292.779	0.0145695	IV	Fall Exp.Group (Field-captured)
319.23	0.999941	IV	Fall Exp.Group (Field-captured)
239.931	0.0235617	IV	Fall Exp.Group (Field-captured)
349.812	0.0780795	IV	Fall Exp.Group (Field-captured)
116.007	0.333292	IV	Fall Exp.Group (Field-captured)
0.252076	0.163709	IV	Fall Exp.Group (Field-captured)
345.021	0.113682	IV	Fall Exp.Group (Field-captured)
204.961	0.0180248	IV	Fall Exp.Group (Field-captured)
186.428	0.322571	IV	Fall Exp.Group (Field-captured)
152.89	0.844938	IV	Fall Exp.Group (Field-captured)
189.078	0.821014	IV	Fall Exp.Group (Field-captured)
123.143	0.913465	IV	Fall Exp.Group (Field-captured)
161.569	0.920455	IV	Fall Exp.Group (Field-captured)
240.178	0.109191	IV	Fall Exp.Group (Field-captured)
112.675	0.280553	IV	Fall Exp.Group (Field-captured)
164.574	0.4261	IV	Fall Exp.Group (Field-captured)
112.166	0.345815	IV	Fall Exp.Group (Field-captured)
145.238	0.765179	IV	Fall Exp.Group (Field-captured)
262.098	0.392555	IV	Fall Exp.Group (Field-captured)
175.679	0.208494	IV	Fall Exp.Group (Field-captured)
111.934	0.325246	IV	Fall Exp.Group (Field-captured)
194.811	0.791222	IV	Fall Exp.Group (Field-captured)
216.861	0.0161838	III	Fall Exp.Group (Field-captured)
327.308	0.719299	III	Fall Exp.Group (Field-captured)
24.1755	0.0818169	III	Fall Exp.Group (Field-captured)
188.391	0.657369	III	Fall Exp.Group (Field-captured)
285.201	0.035242	III	Fall Exp.Group (Field-captured)
165.743	0.250015	III	Fall Exp.Group (Field-captured)
229.382	0.0259201	III	Fall Exp.Group (Field-captured)
271.717	0.0257705	III	Fall Exp.Group (Field-captured)
235.463	0.274008	III	Fall Exp.Group (Field-captured)
202.167	0.301919	III	Fall Exp.Group (Field-captured)
321.088	0.348922	III	Fall Exp.Group (Field-captured)
179.177	0.138204	III	Fall Exp.Group (Field-captured)
55.5501	0.382815	III	Fall Exp.Group (Field-captured)
225.678	0.0698021	III	Fall Exp.Group (Field-captured)
19.9985	0.0554625	III	Fall Exp.Group (Field-captured)
182.709	0.390803	III	Fall Exp.Group (Field-captured)
203.524	0.313961	III	Fall Exp.Group (Field-captured)
142.785	0.280372	III	Fall Exp.Group (Field-captured)
166.185	0.255248	III	Fall Exp.Group (Field-captured)
103.443	0.805322	III	Fall Exp.Group (Field-captured)
202.632	0.551492	III	Fall Exp.Group (Field-captured)
289.257	0.397936	III	Fall Exp.Group (Field-captured)
38.46	0.139644	III	Fall Exp.Group (Field-captured)
351.294	0.575235	III	Fall Exp.Group (Field-captured)
116.987	0.40084	III	Fall Exp.Group (Field-captured)
293.184	0.121789	III	Fall Exp.Group (Field-captured)
105.55	0.74039	III	Fall Exp.Group (Field-captured)
1.3533	0.0724307	III	Fall Exp.Group (Field-captured)
25.8097	0.614905	III	Fall Exp.Group (Field-captured)
173.631	0.0127899	II	Fall Exp.Group (Field-captured)
316.814	0.694548	II	Fall Exp.Group (Field-captured)
168.518	0.738527	II	Fall Exp.Group (Field-captured)
186.922	0.914016	II	Fall Exp.Group (Field-captured)
234.645	0.221788	II	Fall Exp.Group (Field-captured)
117.23	0.0766125	II	Fall Exp.Group (Field-captured)
110.488	0.235864	II	Fall Exp.Group (Field-captured)
212.124	0.0775288	II	Fall Exp.Group (Field-captured)
251.521	0.925329	II	Fall Exp.Group (Field-captured)
191.22	0.527465	II	Fall Exp.Group (Field-captured)
157.423	0.0263196	II	Fall Exp.Group (Field-captured)
258.861	0.111501	II	Fall Exp.Group (Field-captured)
24.1168	0.0949807	II	Fall Exp.Group (Field-captured)
211.344	0.0981641	II	Fall Exp.Group (Field-captured)
9.42836	0.010947	II	Fall Exp.Group (Field-captured)
203.274	0.228787	II	Fall Exp.Group (Field-captured)
165.268	0.982612	II	Fall Exp.Group (Field-captured)
233.59	0.612032	II	Fall Exp.Group (Field-captured)
87.9026	0.117402	II	Fall Exp.Group (Field-captured)
62.1975	0.255728	II	Fall Exp.Group (Field-captured)
247.054	0.413307	II	Fall Exp.Group (Field-captured)
146.568	0.436792	II	Fall Exp.Group (Field-captured)
29.5632	0.136437	II	Fall Exp.Group (Field-captured)
321.222	0.443686	II	Fall Exp.Group (Field-captured)
129.792	0.591717	II	Fall Exp.Group (Field-captured)
250.069	0.350771	II	Fall Exp.Group (Field-captured)
163.611	0.961203	II	Fall Exp.Group (Field-captured)
206.776	0.111221	II	Fall Exp.Group (Field-captured)
69.0832	0.2512	II	Fall Exp.Group (Field-captured)
232.46	0.0132835	I	Fall Exp.Group (Field-captured)
244.958	0.494559	I	Fall Exp.Group (Field-captured)
120.232	0.685279	I	Fall Exp.Group (Field-captured)
131.291	0.222212	I	Fall Exp.Group (Field-captured)
169.86	0.369659	I	Fall Exp.Group (Field-captured)
173.572	0.141301	I	Fall Exp.Group (Field-captured)
128.585	0.427265	I	Fall Exp.Group (Field-captured)
209.018	0.380722	I	Fall Exp.Group (Field-captured)
201.074	0.973657	I	Fall Exp.Group (Field-captured)
180.158	0.665533	I	Fall Exp.Group (Field-captured)
280.543	0.67049	I	Fall Exp.Group (Field-captured)
125.033	0.274245	I	Fall Exp.Group (Field-captured)
13.858	0.0287267	I	Fall Exp.Group (Field-captured)
206.923	0.241892	I	Fall Exp.Group (Field-captured)
166.485	0.651821	I	Fall Exp.Group (Field-captured)
230.657	0.22554	I	Fall Exp.Group (Field-captured)
175.096	0.994051	I	Fall Exp.Group (Field-captured)
140.521	0.122165	I	Fall Exp.Group (Field-captured)
139.896	0.659411	I	Fall Exp.Group (Field-captured)
104.918	0.122564	I	Fall Exp.Group (Field-captured)
235.028	0.237814	I	Fall Exp.Group (Field-captured)
173.494	0.234061	I	Fall Exp.Group (Field-captured)
226.579	0.191924	I	Fall Exp.Group (Field-captured)
272.206	0.0201522	I	Fall Exp.Group (Field-captured)
229.709	0.28518	I	Fall Exp.Group (Field-captured)
311.121	0.453289	I	Fall Exp.Group (Field-captured)
131.081	0.771727	I	Fall Exp.Group (Field-captured)
262.141	0.179534	I	Fall Exp.Group (Field-captured)
180.422	0.440097	I	Fall Exp.Group (Field-captured)
111.261	0.0615256	V	Exp. Group(Lab-raised)
201.464	0.998222	V	Exp. Group(Lab-raised)
165.628	0.615777	V	Exp. Group(Lab-raised)
251.765	0.00839538	V	Exp. Group(Lab-raised)
318.896	0.157724	V	Exp. Group(Lab-raised)
283.737	0.0270191	V	Exp. Group(Lab-raised)
64.7328	0.029324	V	Exp. Group(Lab-raised)
92.5477	0.0750511	V	Exp. Group(Lab-raised)
128.849	0.947248	V	Exp. Group(Lab-raised)
278.241	0.0231051	V	Exp. Group(Lab-raised)
100.304	0.686324	V	Exp. Group(Lab-raised)
150.575	0.803276	V	Exp. Group(Lab-raised)
314.619	0.0185517	V	Exp. Group(Lab-raised)
144.46	0.883671	V	Exp. Group(Lab-raised)
331.329	0.165948	V	Exp. Group(Lab-raised)
182.945	0.828435	V	Exp. Group(Lab-raised)
94.7383	0.645692	V	Exp. Group(Lab-raised)
103.445	0.460788	V	Exp. Group(Lab-raised)
270.992	0.841183	V	Exp. Group(Lab-raised)
229.751	0.0466194	V	Exp. Group(Lab-raised)
298.242	0.0696173	V	Exp. Group(Lab-raised)
197.754	0.0673437	V	Exp. Group(Lab-raised)
72.2216	0.455797	V	Exp. Group(Lab-raised)
193.7	0.0371675	V	Exp. Group(Lab-raised)
139.513	0.750161	V	Exp. Group(Lab-raised)
15.5878	0.135269	V	Exp. Group(Lab-raised)
67.4585	0.832917	V	Exp. Group(Lab-raised)
138.976	0.212225	IV	Exp. Group(Lab-raised)
187.516	0.699863	IV	Exp. Group(Lab-raised)
178.361	0.737558	IV	Exp. Group(Lab-raised)
314.572	0.00991747	IV	Exp. Group(Lab-raised)
156.821	0.578667	IV	Exp. Group(Lab-raised)
281.527	0.00721201	IV	Exp. Group(Lab-raised)
143.577	0.0126457	IV	Exp. Group(Lab-raised)
209.577	0.866179	IV	Exp. Group(Lab-raised)
215.541	0.901238	IV	Exp. Group(Lab-raised)
219.679	0.0787637	IV	Exp. Group(Lab-raised)
129.074	0.570126	IV	Exp. Group(Lab-raised)
203.568	0.420823	IV	Exp. Group(Lab-raised)
341.759	0.0159932	IV	Exp. Group(Lab-raised)
233.822	0.876907	IV	Exp. Group(Lab-raised)
320.089	0.0295366	IV	Exp. Group(Lab-raised)
189.963	0.778053	IV	Exp. Group(Lab-raised)
180.226	0.903541	IV	Exp. Group(Lab-raised)
162.807	0.914409	IV	Exp. Group(Lab-raised)
171.743	0.0843054	IV	Exp. Group(Lab-raised)
262.773	0.0446156	IV	Exp. Group(Lab-raised)
159.308	0.0210689	IV	Exp. Group(Lab-raised)
212.741	0.0780357	IV	Exp. Group(Lab-raised)
174.108	0.607519	IV	Exp. Group(Lab-raised)
167.067	0.0202595	IV	Exp. Group(Lab-raised)
146.37	0.881187	IV	Exp. Group(Lab-raised)
214.172	0.0991882	IV	Exp. Group(Lab-raised)
157.916	0.964067	IV	Exp. Group(Lab-raised)
122.218	0.588337	III	Exp. Group(Lab-raised)
294.201	0.311311	III	Exp. Group(Lab-raised)
104.742	0.557448	III	Exp. Group(Lab-raised)
250.822	0.0160877	III	Exp. Group(Lab-raised)
11.1121	0.948173	III	Exp. Group(Lab-raised)
265.396	0.0307511	III	Exp. Group(Lab-raised)
51.8435	0.00637523	III	Exp. Group(Lab-raised)
319.156	0.346337	III	Exp. Group(Lab-raised)
61.7639	0.524158	III	Exp. Group(Lab-raised)
195.617	0.148113	III	Exp. Group(Lab-raised)
110.397	0.543932	III	Exp. Group(Lab-raised)
94.7656	0.356207	III	Exp. Group(Lab-raised)
297.169	0.030664	III	Exp. Group(Lab-raised)
198.692	0.523788	III	Exp. Group(Lab-raised)
37.5724	0.0748936	III	Exp. Group(Lab-raised)
217.626	0.169629	III	Exp. Group(Lab-raised)
195.67	0.436242	III	Exp. Group(Lab-raised)
69.0884	0.921247	III	Exp. Group(Lab-raised)
270.891	0.364549	III	Exp. Group(Lab-raised)
154.684	0.921477	III	Exp. Group(Lab-raised)
69.0838	0.00643929	III	Exp. Group(Lab-raised)
328.356	0.140168	III	Exp. Group(Lab-raised)
168.448	0.194163	III	Exp. Group(Lab-raised)
309.097	0.00342389	III	Exp. Group(Lab-raised)
10.911	0.334085	III	Exp. Group(Lab-raised)
177.81	0.00737282	III	Exp. Group(Lab-raised)
108.454	0.996157	III	Exp. Group(Lab-raised)
99.6654	0.0390685	II	Exp. Group(Lab-raised)
252.636	0.414218	II	Exp. Group(Lab-raised)
262.825	0.00459631	II	Exp. Group(Lab-raised)
310.566	0.0635257	II	Exp. Group(Lab-raised)
36.5552	0.337498	II	Exp. Group(Lab-raised)
222.984	0.397893	II	Exp. Group(Lab-raised)
94.509	0.0352177	II	Exp. Group(Lab-raised)
213.762	0.365871	II	Exp. Group(Lab-raised)
295.236	0.237146	II	Exp. Group(Lab-raised)
195.437	0.261622	II	Exp. Group(Lab-raised)
197.633	0.635525	II	Exp. Group(Lab-raised)
154.774	0.511552	II	Exp. Group(Lab-raised)
191.6	0.167431	II	Exp. Group(Lab-raised)
119.212	0.717675	II	Exp. Group(Lab-raised)
1.97739	0.503297	II	Exp. Group(Lab-raised)
164.994	0.45145	II	Exp. Group(Lab-raised)
175.5	0.901102	II	Exp. Group(Lab-raised)
173.994	0.467118	II	Exp. Group(Lab-raised)
267.757	0.992581	II	Exp. Group(Lab-raised)
168.73	0.998981	II	Exp. Group(Lab-raised)
276.866	0.239751	II	Exp. Group(Lab-raised)
115.259	0.104424	II	Exp. Group(Lab-raised)
196.93	0.719635	II	Exp. Group(Lab-raised)
303.231	0.0366941	II	Exp. Group(Lab-raised)
171.113	0.48585	II	Exp. Group(Lab-raised)
326.016	0.0903071	II	Exp. Group(Lab-raised)
105.228	0.992506	II	Exp. Group(Lab-raised)
180.175	0.675753	I	Exp. Group(Lab-raised)
246.225	0.287371	I	Exp. Group(Lab-raised)
117.701	0.404723	I	Exp. Group(Lab-raised)
188.736	0.947696	I	Exp. Group(Lab-raised)
256.19	0.0118194	I	Exp. Group(Lab-raised)
13.8061	0.157927	I	Exp. Group(Lab-raised)
220.366	0.464142	I	Exp. Group(Lab-raised)
223.542	0.517829	I	Exp. Group(Lab-raised)
133.121	0.864852	I	Exp. Group(Lab-raised)
161.195	0.231166	I	Exp. Group(Lab-raised)
166.295	0.657547	I	Exp. Group(Lab-raised)
217.951	0.573042	I	Exp. Group(Lab-raised)
233.419	0.55878	I	Exp. Group(Lab-raised)
87.485	0.334742	I	Exp. Group(Lab-raised)
183.984	0.432953	I	Exp. Group(Lab-raised)
215.145	0.481692	I	Exp. Group(Lab-raised)
60.4833	0.556404	I	Exp. Group(Lab-raised)
206.596	0.845159	I	Exp. Group(Lab-raised)
230.907	0.893008	I	Exp. Group(Lab-raised)
169.608	0.742612	I	Exp. Group(Lab-raised)
287.727	0.101602	I	Exp. Group(Lab-raised)
172.602	0.471449	I	Exp. Group(Lab-raised)
210.95	0.733467	I	Exp. Group(Lab-raised)
142.738	0.153832	I	Exp. Group(Lab-raised)
129.303	0.44388	I	Exp. Group(Lab-raised)
264.621	0.176721	I	Exp. Group(Lab-raised)
95.5533	0.970962	I	Exp. Group(Lab-raised)
169.148	0.870049	V	Contral Group(Lab-raised)
173.927	0.588025	V	Contral Group(Lab-raised)
312.626	0.0398149	V	Contral Group(Lab-raised)
320.41	0.0118956	V	Contral Group(Lab-raised)
249.291	0.66653	V	Contral Group(Lab-raised)
196.466	0.662636	V	Contral Group(Lab-raised)
213.038	0.431281	V	Contral Group(Lab-raised)
176.824	0.265903	V	Contral Group(Lab-raised)
158.484	0.954759	V	Contral Group(Lab-raised)
196.911	0.965226	V	Contral Group(Lab-raised)
213.263	0.448654	V	Contral Group(Lab-raised)
158.608	0.935379	V	Contral Group(Lab-raised)
102.863	0.163354	V	Contral Group(Lab-raised)
174.146	0.590686	V	Contral Group(Lab-raised)
230.778	0.0348663	V	Contral Group(Lab-raised)
101.69	0.112316	V	Contral Group(Lab-raised)
24.1926	0.00201145	V	Contral Group(Lab-raised)
278.578	0.0134868	V	Contral Group(Lab-raised)
129.839	0.823155	V	Contral Group(Lab-raised)
296.044	0.0109101	V	Contral Group(Lab-raised)
116.667	0.917123	V	Contral Group(Lab-raised)
100.034	0.0937095	V	Contral Group(Lab-raised)
206.45	0.879059	V	Contral Group(Lab-raised)
242.587	0.0235991	V	Contral Group(Lab-raised)
256.287	0.587479	V	Contral Group(Lab-raised)
221.499	0.812276	V	Contral Group(Lab-raised)
297.986	0.0839526	IV	Contral Group(Lab-raised)
197.608	0.976705	IV	Contral Group(Lab-raised)
16.1641	0.0149775	IV	Contral Group(Lab-raised)
5.37067	0.0338531	IV	Contral Group(Lab-raised)
130.947	0.287596	IV	Contral Group(Lab-raised)
239.66	0.859827	IV	Contral Group(Lab-raised)
114.381	0.0980118	IV	Contral Group(Lab-raised)
146.441	0.552086	IV	Contral Group(Lab-raised)
219.932	0.821581	IV	Contral Group(Lab-raised)
233.52	0.836114	IV	Contral Group(Lab-raised)
92.8215	0.22873	IV	Contral Group(Lab-raised)
135.737	0.935462	IV	Contral Group(Lab-raised)
233.248	0.286538	IV	Contral Group(Lab-raised)
169.023	0.873959	IV	Contral Group(Lab-raised)
264.216	0.065891	IV	Contral Group(Lab-raised)
186.73	0.713194	IV	Contral Group(Lab-raised)
274.088	0.0166011	IV	Contral Group(Lab-raised)
310.658	0.0382749	IV	Contral Group(Lab-raised)
185.678	0.930238	IV	Contral Group(Lab-raised)
145.582	0.148984	IV	Contral Group(Lab-raised)
37.473	0.593779	IV	Contral Group(Lab-raised)
139.823	0.442008	IV	Contral Group(Lab-raised)
230.962	0.522286	IV	Contral Group(Lab-raised)
258.219	0.120484	IV	Contral Group(Lab-raised)
157.209	0.488211	IV	Contral Group(Lab-raised)
192.16	0.748481	IV	Contral Group(Lab-raised)
201.392	0.580156	III	Contral Group(Lab-raised)
190.535	0.697001	III	Contral Group(Lab-raised)
263.231	0.00957617	III	Contral Group(Lab-raised)
255.974	0.187744	III	Contral Group(Lab-raised)
225.418	0.926472	III	Contral Group(Lab-raised)
211.771	0.776079	III	Contral Group(Lab-raised)
248.957	0.464684	III	Contral Group(Lab-raised)
185.351	0.318764	III	Contral Group(Lab-raised)
253.734	0.117605	III	Contral Group(Lab-raised)
161.258	0.930745	III	Contral Group(Lab-raised)
205.295	0.456649	III	Contral Group(Lab-raised)
92.912	0.75245	III	Contral Group(Lab-raised)
202.894	0.508442	III	Contral Group(Lab-raised)
238.594	0.777239	III	Contral Group(Lab-raised)
305.892	0.0363426	III	Contral Group(Lab-raised)
149.263	0.16212	III	Contral Group(Lab-raised)
21.4553	0.800289	III	Contral Group(Lab-raised)
224.279	0.0801521	III	Contral Group(Lab-raised)
86.8324	0.321321	III	Contral Group(Lab-raised)
224.473	0.20922	III	Contral Group(Lab-raised)
176.15	0.237034	III	Contral Group(Lab-raised)
114.778	0.580505	III	Contral Group(Lab-raised)
229.556	0.198503	III	Contral Group(Lab-raised)
261.988	0.22099	III	Contral Group(Lab-raised)
35.3404	0.190248	III	Contral Group(Lab-raised)
187.857	0.523883	III	Contral Group(Lab-raised)
172.305	0.525523	II	Contral Group(Lab-raised)
198.241	0.818732	II	Contral Group(Lab-raised)
208.503	0.488217	II	Contral Group(Lab-raised)
214.333	0.296001	II	Contral Group(Lab-raised)
221.546	0.524541	II	Contral Group(Lab-raised)
194.785	0.504669	II	Contral Group(Lab-raised)
204.019	0.680093	II	Contral Group(Lab-raised)
125.528	0.265523	II	Contral Group(Lab-raised)
209.281	0.555519	II	Contral Group(Lab-raised)
177.277	0.800483	II	Contral Group(Lab-raised)
302.717	0.298928	II	Contral Group(Lab-raised)
157.593	0.475561	II	Contral Group(Lab-raised)
137.632	0.547354	II	Contral Group(Lab-raised)
175.523	0.248952	II	Contral Group(Lab-raised)
216.534	0.153429	II	Contral Group(Lab-raised)
41.8112	0.143205	II	Contral Group(Lab-raised)
37.8011	0.613971	II	Contral Group(Lab-raised)
169.209	0.240834	II	Contral Group(Lab-raised)
7.73791	0.036624	II	Contral Group(Lab-raised)
139.042	0.0726335	II	Contral Group(Lab-raised)
243.501	0.400372	II	Contral Group(Lab-raised)
141.026	0.673621	II	Contral Group(Lab-raised)
188.512	0.663961	II	Contral Group(Lab-raised)
152.193	0.386708	II	Contral Group(Lab-raised)
214.15	0.737994	II	Contral Group(Lab-raised)
162.939	0.90489	II	Contral Group(Lab-raised)
178.965	0.955898	I	Contral Group(Lab-raised)
166.575	0.456704	I	Contral Group(Lab-raised)
175.555	0.132298	I	Contral Group(Lab-raised)
148.399	0.171314	I	Contral Group(Lab-raised)
193.145	0.102358	I	Contral Group(Lab-raised)
236.42	0.811096	I	Contral Group(Lab-raised)
207.452	0.349354	I	Contral Group(Lab-raised)
138.809	0.229595	I	Contral Group(Lab-raised)
220.773	0.710371	I	Contral Group(Lab-raised)
177.248	0.821529	I	Contral Group(Lab-raised)
191.664	0.94319	I	Contral Group(Lab-raised)
187.127	0.815112	I	Contral Group(Lab-raised)
244.084	0.187195	I	Contral Group(Lab-raised)
68.1636	0.669011	I	Contral Group(Lab-raised)
313.262	0.0856697	I	Contral Group(Lab-raised)
158.738	0.354329	I	Contral Group(Lab-raised)
300.842	0.0982263	I	Contral Group(Lab-raised)
128.564	0.723787	I	Contral Group(Lab-raised)
147.354	0.582342	I	Contral Group(Lab-raised)
163.959	0.917733	I	Contral Group(Lab-raised)
239.804	0.723652	I	Contral Group(Lab-raised)
151.45	0.423746	I	Contral Group(Lab-raised)
198.29	0.353744	I	Contral Group(Lab-raised)
151.912	0.421697	I	Contral Group(Lab-raised)
202.961	0.889102	I	Contral Group(Lab-raised)
169.854	0.522574	I	Contral Group(Lab-raised)
99.2366	0.2607	V	Spring Exp.Group (Field-captured)
255.981	0.522742	V	Spring Exp.Group (Field-captured)
331.286	0.876517	V	Spring Exp.Group (Field-captured)
59.348	0.60734	V	Spring Exp.Group (Field-captured)
272.151	0.357422	V	Spring Exp.Group (Field-captured)
318.255	0.722398	V	Spring Exp.Group (Field-captured)
23.5319	0.748426	V	Spring Exp.Group (Field-captured)
256.475	0.377629	V	Spring Exp.Group (Field-captured)
328.01	0.753263	V	Spring Exp.Group (Field-captured)
358.449	0.443952	V	Spring Exp.Group (Field-captured)
70.248	0.396209	V	Spring Exp.Group (Field-captured)
103.495	0.316706	V	Spring Exp.Group (Field-captured)
15.5829	0.922752	V	Spring Exp.Group (Field-captured)
350.915	0.243152	V	Spring Exp.Group (Field-captured)
330.802	0.486031	V	Spring Exp.Group (Field-captured)
334.426	0.994308	V	Spring Exp.Group (Field-captured)
316.73	0.336063	V	Spring Exp.Group (Field-captured)
324.08	0.802619	V	Spring Exp.Group (Field-captured)
357.938	0.781274	V	Spring Exp.Group (Field-captured)
53.9537	0.40563	V	Spring Exp.Group (Field-captured)
109.555	0.541202	V	Spring Exp.Group (Field-captured)
321.883	0.8262	V	Spring Exp.Group (Field-captured)
351.349	0.630229	V	Spring Exp.Group (Field-captured)
319.715	0.629535	V	Spring Exp.Group (Field-captured)
213.561	0.593492	V	Spring Exp.Group (Field-captured)
319.468	0.0873511	V	Spring Exp.Group (Field-captured)
107.747	0.0248131	V	Spring Exp.Group (Field-captured)
346.794	0.983415	V	Spring Exp.Group (Field-captured)
256.556	0.805434	IV	Spring Exp.Group (Field-captured)
257.978	0.301405	IV	Spring Exp.Group (Field-captured)
45.92	0.531674	IV	Spring Exp.Group (Field-captured)
28.4358	0.537156	IV	Spring Exp.Group (Field-captured)
212.847	0.163051	IV	Spring Exp.Group (Field-captured)
251.505	0.355095	IV	Spring Exp.Group (Field-captured)
339.992	0.545472	IV	Spring Exp.Group (Field-captured)
62.9935	0.734971	IV	Spring Exp.Group (Field-captured)
234.53	0.893319	IV	Spring Exp.Group (Field-captured)
54.463	0.0242032	IV	Spring Exp.Group (Field-captured)
40.8462	0.0645851	IV	Spring Exp.Group (Field-captured)
181.804	0.500212	IV	Spring Exp.Group (Field-captured)
352.811	0.454285	IV	Spring Exp.Group (Field-captured)
57.8504	0.0104307	IV	Spring Exp.Group (Field-captured)
110.732	0.287775	IV	Spring Exp.Group (Field-captured)
200.656	0.491196	IV	Spring Exp.Group (Field-captured)
234.68	0.553512	IV	Spring Exp.Group (Field-captured)
287.208	0.962197	IV	Spring Exp.Group (Field-captured)
264.013	0.62137	IV	Spring Exp.Group (Field-captured)
177.243	0.277559	IV	Spring Exp.Group (Field-captured)
327.77	0.473857	IV	Spring Exp.Group (Field-captured)
154.058	0.595284	IV	Spring Exp.Group (Field-captured)
266.093	0.171235	IV	Spring Exp.Group (Field-captured)
186.14	0.507323	IV	Spring Exp.Group (Field-captured)
236.104	0.733049	IV	Spring Exp.Group (Field-captured)
127.258	0.304929	IV	Spring Exp.Group (Field-captured)
125.199	0.0116507	IV	Spring Exp.Group (Field-captured)
237.922	0.918939	IV	Spring Exp.Group (Field-captured)
283.581	0.617051	III	Spring Exp.Group (Field-captured)
148.344	0.31431	III	Spring Exp.Group (Field-captured)
252.663	0.730997	III	Spring Exp.Group (Field-captured)
343.762	0.323125	III	Spring Exp.Group (Field-captured)
238.548	0.243392	III	Spring Exp.Group (Field-captured)
357.5	0.0866576	III	Spring Exp.Group (Field-captured)
187.56	0.541093	III	Spring Exp.Group (Field-captured)
47.6244	0.261131	III	Spring Exp.Group (Field-captured)
309.237	0.605101	III	Spring Exp.Group (Field-captured)
57.3509	0.0133237	III	Spring Exp.Group (Field-captured)
18.5395	0.0862369	III	Spring Exp.Group (Field-captured)
229.057	0.84888	III	Spring Exp.Group (Field-captured)
24.8842	0.498637	III	Spring Exp.Group (Field-captured)
97.4934	0.0557221	III	Spring Exp.Group (Field-captured)
311.882	0.694816	III	Spring Exp.Group (Field-captured)
292.07	0.177486	III	Spring Exp.Group (Field-captured)
100.089	0.0929916	III	Spring Exp.Group (Field-captured)
77.1363	0.999968	III	Spring Exp.Group (Field-captured)
320.767	0.0866926	III	Spring Exp.Group (Field-captured)
25.116	0.34426	III	Spring Exp.Group (Field-captured)
132.849	0.850347	III	Spring Exp.Group (Field-captured)
329.443	0.831529	III	Spring Exp.Group (Field-captured)
330.952	0.470721	III	Spring Exp.Group (Field-captured)
295.286	0.996889	III	Spring Exp.Group (Field-captured)
197.217	0.553921	III	Spring Exp.Group (Field-captured)
51.4684	0.121842	III	Spring Exp.Group (Field-captured)
157.207	0.0532869	III	Spring Exp.Group (Field-captured)
223.714	0.925673	III	Spring Exp.Group (Field-captured)
273.87	0.582805	II	Spring Exp.Group (Field-captured)
307.686	0.0478737	II	Spring Exp.Group (Field-captured)
325.335	0.663759	II	Spring Exp.Group (Field-captured)
354.925	0.0394344	II	Spring Exp.Group (Field-captured)
230.089	0.210439	II	Spring Exp.Group (Field-captured)
341.455	0.163077	II	Spring Exp.Group (Field-captured)
342.501	0.724649	II	Spring Exp.Group (Field-captured)
347.694	0.382993	II	Spring Exp.Group (Field-captured)
89.5755	0.84863	II	Spring Exp.Group (Field-captured)
66.9162	0.0166096	II	Spring Exp.Group (Field-captured)
15.697	0.0544357	II	Spring Exp.Group (Field-captured)
290.409	0.382612	II	Spring Exp.Group (Field-captured)
305.283	0.783969	II	Spring Exp.Group (Field-captured)
356.927	0.121317	II	Spring Exp.Group (Field-captured)
0.467689	0.645171	II	Spring Exp.Group (Field-captured)
3.1323	0.191354	II	Spring Exp.Group (Field-captured)
251.496	0.0590232	II	Spring Exp.Group (Field-captured)
41.9667	0.456197	II	Spring Exp.Group (Field-captured)
272.797	0.065842	II	Spring Exp.Group (Field-captured)
336.987	0.404099	II	Spring Exp.Group (Field-captured)
36.098	0.430145	II	Spring Exp.Group (Field-captured)
323.566	0.748348	II	Spring Exp.Group (Field-captured)
328.227	0.879422	II	Spring Exp.Group (Field-captured)
290.981	0.369079	II	Spring Exp.Group (Field-captured)
228.969	0.685837	II	Spring Exp.Group (Field-captured)
233.763	0.0411032	II	Spring Exp.Group (Field-captured)
197.685	0.4026	II	Spring Exp.Group (Field-captured)
212.251	0.966414	II	Spring Exp.Group (Field-captured)
255.626	0.0319831	I	Spring Exp.Group (Field-captured)
117.887	0.016515	I	Spring Exp.Group (Field-captured)
356.101	0.157225	I	Spring Exp.Group (Field-captured)
74.2546	0.117977	I	Spring Exp.Group (Field-captured)
181.586	0.0236575	I	Spring Exp.Group (Field-captured)
333.008	0.431164	I	Spring Exp.Group (Field-captured)
333.281	0.647462	I	Spring Exp.Group (Field-captured)
336.657	0.303723	I	Spring Exp.Group (Field-captured)
28.7426	0.550514	I	Spring Exp.Group (Field-captured)
39.719	0.315706	I	Spring Exp.Group (Field-captured)
347.784	0.31067	I	Spring Exp.Group (Field-captured)
311.924	0.416068	I	Spring Exp.Group (Field-captured)
320.007	0.376948	I	Spring Exp.Group (Field-captured)
7.32293	0.112258	I	Spring Exp.Group (Field-captured)
3.33027	0.7129	I	Spring Exp.Group (Field-captured)
66.7893	0.480306	I	Spring Exp.Group (Field-captured)
235.025	0.0433109	I	Spring Exp.Group (Field-captured)
28.1002	0.0703995	I	Spring Exp.Group (Field-captured)
263.865	0.163599	I	Spring Exp.Group (Field-captured)
346.245	0.0990395	I	Spring Exp.Group (Field-captured)
136.177	0.292341	I	Spring Exp.Group (Field-captured)
288.341	0.85951	I	Spring Exp.Group (Field-captured)
57.7526	0.536787	I	Spring Exp.Group (Field-captured)
272.694	0.624822	I	Spring Exp.Group (Field-captured)
22.4507	0.253863	I	Spring Exp.Group (Field-captured)
50.2827	0.446291	I	Spring Exp.Group (Field-captured)
255.128	0.297385	I	Spring Exp.Group (Field-captured)
307.653	0.514173	I	Spring Exp.Group (Field-captured)
