# Supplementary material for: Geomagnetic and visual cues guide seasonal migratory orientation in the nocturnal fall armyworm, the world’s most invasive insect
Source: eLife. 2026 Apr 16;14:RP109098. doi: 10.7554/eLife.109098 (PMC13086496; doi:10.7554/eLife.109098)
Supplement: Figure 3—source data 1. [file elife-109098-fig3-data1.xlsx]

## Sheet: Fig.3
seq	R	Stage	treatment
1	1.38222	I	Fall.Exp.Control
2	1.76254	I	Fall.Exp.Control
3	1.6266	I	Fall.Exp.Control
4	1.70863	I	Fall.Exp.Control
5	1.77613	I	Fall.Exp.Control
6	1.57747	I	Fall.Exp.Control
7	1.79173	I	Fall.Exp.Control
8	1.73645	I	Fall.Exp.Control
9	1.69438	I	Fall.Exp.Control
10	1.60186	I	Fall.Exp.Control
11	1.06033	II	Fall.Exp.Control
12	1.80805	II	Fall.Exp.Control
13	1.86968	II	Fall.Exp.Control
14	1.64947	II	Fall.Exp.Control
15	1.81602	II	Fall.Exp.Control
16	1.292	II	Fall.Exp.Control
17	1.41466	II	Fall.Exp.Control
18	1.22076	II	Fall.Exp.Control
19	0.982007	II	Fall.Exp.Control
20	1.0401	II	Fall.Exp.Control
21	1.26146	III	Fall.Exp.Control
22	1.25931	III	Fall.Exp.Control
23	0.798202	III	Fall.Exp.Control
24	0.809291	III	Fall.Exp.Control
25	0.845036	III	Fall.Exp.Control
26	1.31848	III	Fall.Exp.Control
27	1.23341	III	Fall.Exp.Control
28	0.961158	III	Fall.Exp.Control
29	1.24006	III	Fall.Exp.Control
30	1.4136	III	Fall.Exp.Control
31	1.54179	IV	Fall.Exp.Control
32	1.76421	IV	Fall.Exp.Control
33	1.66492	IV	Fall.Exp.Control
34	1.41121	IV	Fall.Exp.Control
35	1.29631	IV	Fall.Exp.Control
36	1.1755	IV	Fall.Exp.Control
37	1.10905	IV	Fall.Exp.Control
38	0.857721	IV	Fall.Exp.Control
39	0.770647	IV	Fall.Exp.Control
40	1.04274	IV	Fall.Exp.Control
41	1.62249	V	Fall.Exp.Control
42	1.47806	V	Fall.Exp.Control
43	1.72487	V	Fall.Exp.Control
44	1.12064	V	Fall.Exp.Control
45	1.49518	V	Fall.Exp.Control
46	1.26136	V	Fall.Exp.Control
47	1.53339	V	Fall.Exp.Control
48	1.47864	V	Fall.Exp.Control
49	1.32673	V	Fall.Exp.Control
50	1.52904	V	Fall.Exp.Control
1	0.849442	I	Fall.Exp.Lab
2	0.80009	I	Fall.Exp.Lab
3	1.32191	I	Fall.Exp.Lab
4	1.32341	I	Fall.Exp.Lab
5	1.79213	I	Fall.Exp.Lab
6	1.47671	I	Fall.Exp.Lab
7	1.4961	I	Fall.Exp.Lab
8	1.41182	I	Fall.Exp.Lab
9	1.88827	I	Fall.Exp.Lab
10	1.51867	I	Fall.Exp.Lab
11	1.06042	II	Fall.Exp.Lab
12	1.51668	II	Fall.Exp.Lab
13	1.22493	II	Fall.Exp.Lab
14	1.23493	II	Fall.Exp.Lab
15	0.512729	II	Fall.Exp.Lab
16	0.493577	II	Fall.Exp.Lab
17	0.764734	II	Fall.Exp.Lab
18	1.04918	II	Fall.Exp.Lab
19	1.11345	II	Fall.Exp.Lab
20	0.547012	II	Fall.Exp.Lab
21	0.352119	III	Fall.Exp.Lab
22	0.61302	III	Fall.Exp.Lab
23	0.70621	III	Fall.Exp.Lab
24	0.756267	III	Fall.Exp.Lab
25	0.694116	III	Fall.Exp.Lab
26	0.41283	III	Fall.Exp.Lab
27	0.52785	III	Fall.Exp.Lab
28	0.462162	III	Fall.Exp.Lab
29	0.391167	III	Fall.Exp.Lab
30	0.752729	III	Fall.Exp.Lab
31	1.78089	IV	Fall.Exp.Lab
32	1.88599	IV	Fall.Exp.Lab
33	1.67393	IV	Fall.Exp.Lab
34	1.67416	IV	Fall.Exp.Lab
35	1.65039	IV	Fall.Exp.Lab
36	1.36677	IV	Fall.Exp.Lab
37	1.7298	IV	Fall.Exp.Lab
38	1.63929	IV	Fall.Exp.Lab
39	1.30808	IV	Fall.Exp.Lab
40	1.48228	IV	Fall.Exp.Lab
41	0.821416	V	Fall.Exp.Lab
42	0.660102	V	Fall.Exp.Lab
43	0.802079	V	Fall.Exp.Lab
44	1.1674	V	Fall.Exp.Lab
45	0.746867	V	Fall.Exp.Lab
46	0.567964	V	Fall.Exp.Lab
47	0.873034	V	Fall.Exp.Lab
48	0.945296	V	Fall.Exp.Lab
49	0.840819	V	Fall.Exp.Lab
50	0.934093	V	Fall.Exp.Lab
1	1.31207	I	Fall.exp.Field
2	1.2049	I	Fall.exp.Field
3	1.35022	I	Fall.exp.Field
4	1.2026	I	Fall.exp.Field
5	1.16172	I	Fall.exp.Field
6	1.41803	I	Fall.exp.Field
7	1.18723	I	Fall.exp.Field
8	1.26845	I	Fall.exp.Field
9	1.6594	I	Fall.exp.Field
10	1.2098	I	Fall.exp.Field
11	1.12946	II	Fall.exp.Field
12	1.40244	II	Fall.exp.Field
13	1.2107	II	Fall.exp.Field
14	0.699358	II	Fall.exp.Field
15	0.561338	II	Fall.exp.Field
16	1.0422	II	Fall.exp.Field
17	0.926052	II	Fall.exp.Field
18	0.694064	II	Fall.exp.Field
19	0.791079	II	Fall.exp.Field
20	0.684244	II	Fall.exp.Field
21	0.633489	III	Fall.exp.Field
22	0.727815	III	Fall.exp.Field
23	0.353865	III	Fall.exp.Field
24	0.125177	III	Fall.exp.Field
25	0.571201	III	Fall.exp.Field
26	0.542565	III	Fall.exp.Field
27	0.16159	III	Fall.exp.Field
28	0.617689	III	Fall.exp.Field
29	0.91337	III	Fall.exp.Field
30	0.570436	III	Fall.exp.Field
31	0.910094	IV	Fall.exp.Field
32	1.09037	IV	Fall.exp.Field
33	1.08275	IV	Fall.exp.Field
34	1.17686	IV	Fall.exp.Field
35	1.44883	IV	Fall.exp.Field
36	1.42375	IV	Fall.exp.Field
37	0.989563	IV	Fall.exp.Field
38	1.3773	IV	Fall.exp.Field
39	1.14386	IV	Fall.exp.Field
40	0.953097	IV	Fall.exp.Field
41	1.12358	V	Fall.exp.Field
42	1.44304	V	Fall.exp.Field
43	1.45062	V	Fall.exp.Field
44	1.36504	V	Fall.exp.Field
45	1.03066	V	Fall.exp.Field
46	1.55164	V	Fall.exp.Field
47	0.946312	V	Fall.exp.Field
48	0.613863	V	Fall.exp.Field
49	1.03565	V	Fall.exp.Field
50	0.867891	V	Fall.exp.Field
