# Supplementary material for: Geomagnetic and visual cues guide seasonal migratory orientation in the nocturnal fall armyworm, the world’s most invasive insect
Source: eLife. 2026 Apr 16;14:RP109098. doi: 10.7554/eLife.109098 (PMC13086496; doi:10.7554/eLife.109098)
Supplement: Figure 4—source data 1. [file elife-109098-fig4-data1.xlsx]

## Sheet: Sheet1
dir	rbar	Stage	Experiment
173.286	rbar	Stage	Experiment
46.178	0.357986	IV	Exp. BMVC
10.6088	0.398932	IV	Exp. BMVC
32.017	0.176874	IV	Exp. BMVC
259.939	0.113607	IV	Exp. BMVC
61.3892	0.0391939	IV	Exp. BMVC
230.671	0.0165556	IV	Exp. BMVC
211.493	0.339039	IV	Exp. BMVC
205.11	0.0135712	IV	Exp. BMVC
18.0012	0.0667176	IV	Exp. BMVC
203.762	0.0570036	IV	Exp. BMVC
171.633	0.168973	IV	Exp. BMVC
200.761	0.396975	IV	Exp. BMVC
47.9085	0.0333255	IV	Exp. BMVC
220.008	0.00574068	IV	Exp. BMVC
146.009	0.189655	IV	Exp. BMVC
156.272	0.00944395	IV	Exp. BMVC
208.609	0.0209632	IV	Exp. BMVC
269.994	0.0128788	IV	Exp. BMVC
121.226	0.0633976	IV	Exp. BMVC
226.251	0.215741	IV	Exp. BMVC
247.059	0.195344	IV	Exp. BMVC
141.267	0.00450599	IV	Exp. BMVC
80.5893	0.00489031	IV	Exp. BMVC
224.277	0.25894	IV	Exp. BMVC
303.489	0.0537329	IV	Exp. BMVC
12.4107	0.0711745	IV	Exp. BMVC
210.14	0.0367928	IV	Exp. BMVC
3.95565	0.0835035	IV	Exp. BMVC
122.087	0.0320506	IV	Exp. BMVC
19.4791	0.0205357	IV	Exp. BMVC
252.073	0.0604725	III	Exp. BMVC
134.216	0.201319	III	Exp. BMVC
334.925	0.0988441	III	Exp. BMVC
232.606	0.307868	III	Exp. BMVC
19.6303	0.0896786	III	Exp. BMVC
102.054	0.00468434	III	Exp. BMVC
332.321	0.424266	III	Exp. BMVC
184.66	0.00700373	III	Exp. BMVC
122.392	0.0197018	III	Exp. BMVC
305.715	0.0616313	III	Exp. BMVC
137.949	0.0412727	III	Exp. BMVC
243.161	0.060743	III	Exp. BMVC
142.787	0.0304599	III	Exp. BMVC
298.063	0.0102232	III	Exp. BMVC
310.317	0.651229	III	Exp. BMVC
136.436	0.00169529	III	Exp. BMVC
157.967	0.0332956	III	Exp. BMVC
305.164	0.00870154	III	Exp. BMVC
341.588	0.032874	III	Exp. BMVC
150.776	0.0084148	III	Exp. BMVC
320.66	0.604395	III	Exp. BMVC
243.851	0.00271815	III	Exp. BMVC
37.1039	0.00515327	III	Exp. BMVC
71.2955	0.431502	III	Exp. BMVC
216.622	0.126628	III	Exp. BMVC
122.554	0.0286015	III	Exp. BMVC
14.6402	0.0249117	III	Exp. BMVC
71.4441	0.0226446	III	Exp. BMVC
63.1568	0.00409209	III	Exp. BMVC
246.727	0.0438318	III	Exp. BMVC
169.177	0.0742681	II	Exp. BMVC
35.8917	0.119985	II	Exp. BMVC
249.81	0.0179477	II	Exp. BMVC
10.5347	0.381628	II	Exp. BMVC
313.188	0.084832	II	Exp. BMVC
59.7038	0.0169037	II	Exp. BMVC
173.478	0.0201226	II	Exp. BMVC
329.102	0.210656	II	Exp. BMVC
149.817	0.0136488	II	Exp. BMVC
85.8207	0.0384692	II	Exp. BMVC
132.313	0.0562034	II	Exp. BMVC
260.743	0.019475	II	Exp. BMVC
87.7623	0.0215653	II	Exp. BMVC
206.718	0.0267897	II	Exp. BMVC
103.088	0.0777426	II	Exp. BMVC
289.248	0.020818	II	Exp. BMVC
119.16	0.0215754	II	Exp. BMVC
295.666	0.100766	II	Exp. BMVC
303.015	0.0713264	II	Exp. BMVC
76.2123	0.208133	II	Exp. BMVC
113.087	0.25682	II	Exp. BMVC
91.3548	0.00254462	II	Exp. BMVC
263.762	0.0107813	II	Exp. BMVC
152.731	0.259094	II	Exp. BMVC
259.376	0.0789326	II	Exp. BMVC
254.692	0.0275944	II	Exp. BMVC
220.872	0.00835068	II	Exp. BMVC
286.225	0.291543	II	Exp. BMVC
109.755	0.334868	II	Exp. BMVC
25.4502	0.0252672	II	Exp. BMVC
245.062	0.0687513	I	Exp. BMVC
100.164	0.0574849	I	Exp. BMVC
61.7751	0.151476	I	Exp. BMVC
70.0046	0.207731	I	Exp. BMVC
212.894	0.102916	I	Exp. BMVC
165.099	0.029693	I	Exp. BMVC
150.105	0.107174	I	Exp. BMVC
291.85	0.00843634	I	Exp. BMVC
150.924	0.473891	I	Exp. BMVC
123.825	0.119177	I	Exp. BMVC
248.283	0.125951	I	Exp. BMVC
308.686	0.173901	I	Exp. BMVC
105.229	0.231203	I	Exp. BMVC
147.619	0.133091	I	Exp. BMVC
85.4759	0.201226	I	Exp. BMVC
298.577	0.018674	I	Exp. BMVC
211.654	0.0119876	I	Exp. BMVC
285.411	0.193181	I	Exp. BMVC
281.011	0.0409513	I	Exp. BMVC
22.1625	0.0347141	I	Exp. BMVC
314.649	0.286601	I	Exp. BMVC
98.9264	0.00882597	I	Exp. BMVC
96.2798	0.0263464	I	Exp. BMVC
201.728	0.343397	I	Exp. BMVC
166.51	0.033881	I	Exp. BMVC
321.9	0.041294	I	Exp. BMVC
114.371	0.150393	I	Exp. BMVC
9.58601	0.0931787	I	Exp. BMVC
315.201	0.0113478	I	Exp. BMVC
122.869	0.0539571	I	Exp. BMVC
75.5383	0.274148	illuminated	Fall Exp. Dark
189.64	0.193454	Dark	Fall Exp. Dark
40.7368	0.164817	illuminated	Fall Exp. Dark
240.609	0.213936	Dark	Fall Exp. Dark
337.089	0.819349	illuminated	Fall Exp. Dark
204.32	0.091657	Dark	Fall Exp. Dark
341.279	0.731914	illuminated	Fall Exp. Dark
219.72	0.202935	Dark	Fall Exp. Dark
78.7295	0.4882	illuminated	Fall Exp. Dark
238.026	0.00473082	Dark	Fall Exp. Dark
176.206	0.345036	illuminated	Fall Exp. Dark
355.492	0.243522	Dark	Fall Exp. Dark
335.602	0.0245484	illuminated	Fall Exp. Dark
168.331	0.0197517	Dark	Fall Exp. Dark
269.047	0.186068	illuminated	Fall Exp. Dark
257.647	0.254098	Dark	Fall Exp. Dark
39.5207	0.371553	illuminated	Fall Exp. Dark
220.926	0.0964756	Dark	Fall Exp. Dark
81.4161	0.450192	illuminated	Fall Exp. Dark
265.091	0.0935614	Dark	Fall Exp. Dark
26.7071	0.769667	illuminated	Fall Exp. Dark
171.219	0.177924	Dark	Fall Exp. Dark
128.874	0.213642	illuminated	Fall Exp. Dark
212.82	0.115944	Dark	Fall Exp. Dark
301.822	0.788814	illuminated	Fall Exp. Dark
224.946	0.0220466	Dark	Fall Exp. Dark
231.515	0.0680698	illuminated	Fall Exp. Dark
16.5005	0.173208	Dark	Fall Exp. Dark
209.327	0.179501	illuminated	Fall Exp. Dark
242.797	0.244038	Dark	Fall Exp. Dark
93.6784	0.752449	illuminated	Fall Exp. Dark
338.358	0.0450777	Dark	Fall Exp. Dark
167.87	0.328815	illuminated	Fall Exp. Dark
20.1513	0.0240734	Dark	Fall Exp. Dark
50.4267	0.0307256	illuminated	Fall Exp. Dark
105.179	0.314633	Dark	Fall Exp. Dark
141.523	0.00576827	illuminated	Fall Exp. Dark
15.6276	0.0816762	Dark	Fall Exp. Dark
10.9792	0.0125521	illuminated	Fall Exp. Dark
79	0.0247807	Dark	Fall Exp. Dark
83.9111	0.671278	illuminated	Fall Exp. Dark
157.77	0.171468	Dark	Fall Exp. Dark
291.912	0.125957	illuminated	Fall Exp. Dark
267.87	0.193208	Dark	Fall Exp. Dark
226.613	0.251479	illuminated	Fall Exp. Dark
233.115	0.04794	Dark	Fall Exp. Dark
119.367	0.375219	illuminated	Fall Exp. Dark
71.1032	0.00838086	Dark	Fall Exp. Dark
33.0593	0.130107	illuminated	Fall Exp. Dark
240.21	0.668159	Dark	Fall Exp. Dark
25.0343	0.097054	illuminated	Fall Exp. Dark
291.465	0.0692564	Dark	Fall Exp. Dark
91.2609	0.227689	illuminated	Fall Exp. Dark
149.909	0.00735636	Dark	Fall Exp. Dark
233.01	0.00876463	illuminated	Fall Exp. Dark
140.511	0.14858	Dark	Fall Exp. Dark
334.437	0.587322	illuminated	Fall Exp. Dark
181.575	0.178998	Dark	Fall Exp. Dark
114.005	0.638974	illuminated	Fall Exp. Dark
185.981	0.563961	Dark	Fall Exp. Dark
284.799	0.02511	illuminated	Fall Exp. Dark
	0.0709647	Dark	Fall Exp. Dark
