# Supplementary material for: Geomagnetic and visual cues guide seasonal migratory orientation in the nocturnal fall armyworm, the world’s most invasive insect
Source: eLife. 2026 Apr 16;14:RP109098. doi: 10.7554/eLife.109098 (PMC13086496; doi:10.7554/eLife.109098)
Supplement: Figure 4—source data 2. [file elife-109098-fig4-data2.xlsx]

## Sheet: Fig.4 C Left
rbar	Stage	Experiment
0.357986	IV	Exp. BMVC
0.398932	IV	Exp. BMVC
0.176874	IV	Exp. BMVC
0.113607	IV	Exp. BMVC
0.0391939	IV	Exp. BMVC
0.0165556	IV	Exp. BMVC
0.339039	IV	Exp. BMVC
0.0135712	IV	Exp. BMVC
0.0667176	IV	Exp. BMVC
0.0570036	IV	Exp. BMVC
0.168973	IV	Exp. BMVC
0.396975	IV	Exp. BMVC
0.0333255	IV	Exp. BMVC
0.00574068	IV	Exp. BMVC
0.189655	IV	Exp. BMVC
0.00944395	IV	Exp. BMVC
0.0209632	IV	Exp. BMVC
0.0128788	IV	Exp. BMVC
0.0633976	IV	Exp. BMVC
0.215741	IV	Exp. BMVC
0.195344	IV	Exp. BMVC
0.00450599	IV	Exp. BMVC
0.00489031	IV	Exp. BMVC
0.25894	IV	Exp. BMVC
0.0537329	IV	Exp. BMVC
0.0711745	IV	Exp. BMVC
0.0367928	IV	Exp. BMVC
0.0835035	IV	Exp. BMVC
0.0320506	IV	Exp. BMVC
0.0205357	IV	Exp. BMVC
0.0604725	III	Exp. BMVC
0.201319	III	Exp. BMVC
0.0988441	III	Exp. BMVC
0.307868	III	Exp. BMVC
0.0896786	III	Exp. BMVC
0.00468434	III	Exp. BMVC
0.424266	III	Exp. BMVC
0.00700373	III	Exp. BMVC
0.0197018	III	Exp. BMVC
0.0616313	III	Exp. BMVC
0.0412727	III	Exp. BMVC
0.060743	III	Exp. BMVC
0.0304599	III	Exp. BMVC
0.0102232	III	Exp. BMVC
0.651229	III	Exp. BMVC
0.00169529	III	Exp. BMVC
0.0332956	III	Exp. BMVC
0.00870154	III	Exp. BMVC
0.032874	III	Exp. BMVC
0.0084148	III	Exp. BMVC
0.604395	III	Exp. BMVC
0.00271815	III	Exp. BMVC
0.00515327	III	Exp. BMVC
0.431502	III	Exp. BMVC
0.126628	III	Exp. BMVC
0.0286015	III	Exp. BMVC
0.0249117	III	Exp. BMVC
0.0226446	III	Exp. BMVC
0.00409209	III	Exp. BMVC
0.0438318	III	Exp. BMVC
0.0742681	II	Exp. BMVC
0.119985	II	Exp. BMVC
0.0179477	II	Exp. BMVC
0.381628	II	Exp. BMVC
0.084832	II	Exp. BMVC
0.0169037	II	Exp. BMVC
0.0201226	II	Exp. BMVC
0.210656	II	Exp. BMVC
0.0136488	II	Exp. BMVC
0.0384692	II	Exp. BMVC
0.0562034	II	Exp. BMVC
0.019475	II	Exp. BMVC
0.0215653	II	Exp. BMVC
0.0267897	II	Exp. BMVC
0.0777426	II	Exp. BMVC
0.020818	II	Exp. BMVC
0.0215754	II	Exp. BMVC
0.100766	II	Exp. BMVC
0.0713264	II	Exp. BMVC
0.208133	II	Exp. BMVC
0.25682	II	Exp. BMVC
0.00254462	II	Exp. BMVC
0.0107813	II	Exp. BMVC
0.259094	II	Exp. BMVC
0.0789326	II	Exp. BMVC
0.0275944	II	Exp. BMVC
0.00835068	II	Exp. BMVC
0.291543	II	Exp. BMVC
0.334868	II	Exp. BMVC
0.0252672	II	Exp. BMVC
0.0687513	I	Exp. BMVC
0.0574849	I	Exp. BMVC
0.151476	I	Exp. BMVC
0.207731	I	Exp. BMVC
0.102916	I	Exp. BMVC
0.029693	I	Exp. BMVC
0.107174	I	Exp. BMVC
0.00843634	I	Exp. BMVC
0.473891	I	Exp. BMVC
0.119177	I	Exp. BMVC
0.125951	I	Exp. BMVC
0.173901	I	Exp. BMVC
0.231203	I	Exp. BMVC
0.133091	I	Exp. BMVC
0.201226	I	Exp. BMVC
0.018674	I	Exp. BMVC
0.0119876	I	Exp. BMVC
0.193181	I	Exp. BMVC
0.0409513	I	Exp. BMVC
0.0347141	I	Exp. BMVC
0.286601	I	Exp. BMVC
0.00882597	I	Exp. BMVC
0.0263464	I	Exp. BMVC
0.343397	I	Exp. BMVC
0.033881	I	Exp. BMVC
0.041294	I	Exp. BMVC
0.150393	I	Exp. BMVC
0.0931787	I	Exp. BMVC
0.0113478	I	Exp. BMVC
0.0539571	I	Exp. BMVC
0.274148	illuminated	Fall Exp. Dark
0.193454	Dark	Fall Exp. Dark
0.164817	illuminated	Fall Exp. Dark
0.213936	Dark	Fall Exp. Dark
0.819349	illuminated	Fall Exp. Dark
0.091657	Dark	Fall Exp. Dark
0.731914	illuminated	Fall Exp. Dark
0.202935	Dark	Fall Exp. Dark
0.4882	illuminated	Fall Exp. Dark
0.00473082	Dark	Fall Exp. Dark
0.345036	illuminated	Fall Exp. Dark
0.243522	Dark	Fall Exp. Dark
0.0245484	illuminated	Fall Exp. Dark
0.0197517	Dark	Fall Exp. Dark
0.186068	illuminated	Fall Exp. Dark
0.254098	Dark	Fall Exp. Dark
0.371553	illuminated	Fall Exp. Dark
0.0964756	Dark	Fall Exp. Dark
0.450192	illuminated	Fall Exp. Dark
0.0935614	Dark	Fall Exp. Dark
0.769667	illuminated	Fall Exp. Dark
0.177924	Dark	Fall Exp. Dark
0.213642	illuminated	Fall Exp. Dark
0.115944	Dark	Fall Exp. Dark
0.788814	illuminated	Fall Exp. Dark
0.0220466	Dark	Fall Exp. Dark
0.0680698	illuminated	Fall Exp. Dark
0.173208	Dark	Fall Exp. Dark
0.179501	illuminated	Fall Exp. Dark
0.244038	Dark	Fall Exp. Dark
0.752449	illuminated	Fall Exp. Dark
0.0450777	Dark	Fall Exp. Dark
0.328815	illuminated	Fall Exp. Dark
0.0240734	Dark	Fall Exp. Dark
0.0307256	illuminated	Fall Exp. Dark
0.314633	Dark	Fall Exp. Dark
0.00576827	illuminated	Fall Exp. Dark
0.0816762	Dark	Fall Exp. Dark
0.0125521	illuminated	Fall Exp. Dark
0.0247807	Dark	Fall Exp. Dark
0.671278	illuminated	Fall Exp. Dark
0.171468	Dark	Fall Exp. Dark
0.125957	illuminated	Fall Exp. Dark
0.193208	Dark	Fall Exp. Dark
0.251479	illuminated	Fall Exp. Dark
0.04794	Dark	Fall Exp. Dark
0.375219	illuminated	Fall Exp. Dark
0.00838086	Dark	Fall Exp. Dark
0.130107	illuminated	Fall Exp. Dark
0.668159	Dark	Fall Exp. Dark
0.097054	illuminated	Fall Exp. Dark
0.0692564	Dark	Fall Exp. Dark
0.227689	illuminated	Fall Exp. Dark
0.00735636	Dark	Fall Exp. Dark
0.00876463	illuminated	Fall Exp. Dark
0.14858	Dark	Fall Exp. Dark
0.587322	illuminated	Fall Exp. Dark
0.178998	Dark	Fall Exp. Dark
0.638974	illuminated	Fall Exp. Dark
0.563961	Dark	Fall Exp. Dark
0.02511	illuminated	Fall Exp. Dark
0.0709647	Dark	Fall Exp. Dark

## Sheet: Fig.4 C Right
Mean directional change	Stage	Experiment
46.8254	illuminated	Fall Exp. Dark
45.6161	Dark	Fall Exp. Dark
17.8395	illuminated	Fall Exp. Dark
83.3121	Dark	Fall Exp. Dark
19.1526	illuminated	Fall Exp. Dark
94.5506	Dark	Fall Exp. Dark
9.80964	illuminated	Fall Exp. Dark
38.9963	Dark	Fall Exp. Dark
0.662508	illuminated	Fall Exp. Dark
92.7294	Dark	Fall Exp. Dark
21.5436	illuminated	Fall Exp. Dark
64.7102	Dark	Fall Exp. Dark
103.417	illuminated	Fall Exp. Dark
134.018	Dark	Fall Exp. Dark
47.2824	illuminated	Fall Exp. Dark
38.8732	Dark	Fall Exp. Dark
61.105	illuminated	Fall Exp. Dark
85.3544	Dark	Fall Exp. Dark
34.0032	illuminated	Fall Exp. Dark
79.582	Dark	Fall Exp. Dark
4.11676	illuminated	Fall Exp. Dark
43.6657	Dark	Fall Exp. Dark
75.5112	illuminated	Fall Exp. Dark
92.8712	Dark	Fall Exp. Dark
5.0735	illuminated	Fall Exp. Dark
111.188	Dark	Fall Exp. Dark
34.1219	illuminated	Fall Exp. Dark
50.6342	Dark	Fall Exp. Dark
62.9535	illuminated	Fall Exp. Dark
25.6201	Dark	Fall Exp. Dark
0.918361	illuminated	Fall Exp. Dark
80.6569	Dark	Fall Exp. Dark
58.2154	illuminated	Fall Exp. Dark
101.096	Dark	Fall Exp. Dark
83.0257	illuminated	Fall Exp. Dark
20.5711	Dark	Fall Exp. Dark
106.859	illuminated	Fall Exp. Dark
83.842	Dark	Fall Exp. Dark
113.509	illuminated	Fall Exp. Dark
81.5294	Dark	Fall Exp. Dark
7.61272	illuminated	Fall Exp. Dark
76.299	Dark	Fall Exp. Dark
64.0498	illuminated	Fall Exp. Dark
57.0748	Dark	Fall Exp. Dark
64.1967	illuminated	Fall Exp. Dark
95.9562	Dark	Fall Exp. Dark
28.9522	illuminated	Fall Exp. Dark
82.88	Dark	Fall Exp. Dark
58.4847	illuminated	Fall Exp. Dark
9.43206	Dark	Fall Exp. Dark
95.4537	illuminated	Fall Exp. Dark
95.3821	Dark	Fall Exp. Dark
33.5139	illuminated	Fall Exp. Dark
90.4213	Dark	Fall Exp. Dark
98.8857	illuminated	Fall Exp. Dark
77.1825	Dark	Fall Exp. Dark
35.176	illuminated	Fall Exp. Dark
43.6	Dark	Fall Exp. Dark
5.60891	illuminated	Fall Exp. Dark
12.8035	Dark	Fall Exp. Dark
104.883	illuminated	Fall Exp. Dark
95.214	Dark	Fall Exp. Dark
100.07	I	Exp. BMVC
42.3476	II	Exp. BMVC
57.6891	III	Exp. BMVC
47.3445	IV	Exp. BMVC
59.9187	V	Exp. BMVC
86.0064	I	Exp. BMVC
50.7745	II	Exp. BMVC
64.0713	III	Exp. BMVC
79.4302	IV	Exp. BMVC
97.7837	V	Exp. BMVC
72.0392	I	Exp. BMVC
55.2718	II	Exp. BMVC
32.8961	III	Exp. BMVC
63.2549	IV	Exp. BMVC
25.3733	V	Exp. BMVC
43.5761	I	Exp. BMVC
97.7548	II	Exp. BMVC
96.1587	III	Exp. BMVC
119.156	IV	Exp. BMVC
81.605	V	Exp. BMVC
103.181	I	Exp. BMVC
102.427	II	Exp. BMVC
102.112	III	Exp. BMVC
101.284	IV	Exp. BMVC
87.3614	V	Exp. BMVC
89.3352	I	Exp. BMVC
47.1057	II	Exp. BMVC
68.1701	III	Exp. BMVC
107.63	IV	Exp. BMVC
37.0698	V	Exp. BMVC
106.929	I	Exp. BMVC
108.748	II	Exp. BMVC
14.2746	III	Exp. BMVC
103.058	IV	Exp. BMVC
102.98	V	Exp. BMVC
72.1561	I	Exp. BMVC
62.3457	II	Exp. BMVC
98.2093	III	Exp. BMVC
101.074	IV	Exp. BMVC
100.832	V	Exp. BMVC
91.5232	I	Exp. BMVC
97.3982	II	Exp. BMVC
100.401	III	Exp. BMVC
79.4739	IV	Exp. BMVC
78.1703	V	Exp. BMVC
112.294	I	Exp. BMVC
110.203	II	Exp. BMVC
55.0857	III	Exp. BMVC
63.023	IV	Exp. BMVC
110.101	V	Exp. BMVC
107.764	I	Exp. BMVC
104.889	II	Exp. BMVC
53.1136	III	Exp. BMVC
103.019	IV	Exp. BMVC
110.619	V	Exp. BMVC
101.998	I	Exp. BMVC
88.3505	II	Exp. BMVC
75.4185	III	Exp. BMVC
19.3613	IV	Exp. BMVC
42.2827	V	Exp. BMVC
99.8465	I	Exp. BMVC
108.332	II	Exp. BMVC
112.287	III	Exp. BMVC
109.397	IV	Exp. BMVC
112.375	V	Exp. BMVC
102.558	I	Exp. BMVC
101.357	II	Exp. BMVC
111.746	III	Exp. BMVC
76.212	IV	Exp. BMVC
94.8654	V	Exp. BMVC
105.907	I	Exp. BMVC
110.515	II	Exp. BMVC
95.4205	III	Exp. BMVC
94.0106	IV	Exp. BMVC
103.866	V	Exp. BMVC
103.68	I	Exp. BMVC
94.3855	II	Exp. BMVC
70.288	III	Exp. BMVC
109.317	IV	Exp. BMVC
71.9711	V	Exp. BMVC
20.3206	I	Exp. BMVC
37.9386	II	Exp. BMVC
1.90625	III	Exp. BMVC
12.9206	IV	Exp. BMVC
99.2567	V	Exp. BMVC
109.32	I	Exp. BMVC
116.468	II	Exp. BMVC
113.352	III	Exp. BMVC
102.53	IV	Exp. BMVC
102.031	V	Exp. BMVC
94.5896	I	Exp. BMVC
99.7198	II	Exp. BMVC
56.8422	III	Exp. BMVC
12.5983	IV	Exp. BMVC
34.5794	V	Exp. BMVC
23.0917	I	Exp. BMVC
106.831	II	Exp. BMVC
97.2298	III	Exp. BMVC
72.5962	IV	Exp. BMVC
13.9903	V	Exp. BMVC
102.183	I	Exp. BMVC
75.0927	II	Exp. BMVC
111.735	III	Exp. BMVC
67.7156	IV	Exp. BMVC
87.7435	V	Exp. BMVC
79.9411	I	Exp. BMVC
102.57	II	Exp. BMVC
75.0843	III	Exp. BMVC
48.4752	IV	Exp. BMVC
14.5491	V	Exp. BMVC
92.6668	I	Exp. BMVC
52.7947	II	Exp. BMVC
106.71	III	Exp. BMVC
19.4431	IV	Exp. BMVC
95.2926	V	Exp. BMVC
111.539	I	Exp. BMVC
95.2549	II	Exp. BMVC
104.961	III	Exp. BMVC
98.7771	IV	Exp. BMVC
105.619	V	Exp. BMVC
