# Supplementary material for: Geomagnetic and visual cues guide seasonal migratory orientation in the nocturnal fall armyworm, the world’s most invasive insect
Source: eLife. 2026 Apr 16;14:RP109098. doi: 10.7554/eLife.109098 (PMC13086496; doi:10.7554/eLife.109098)
Supplement: Supplementary file 1. [file elife-109098-supp1.xlsx]

## Sheet: Sheet1
Supplementary File 1. Detailed data of flight orientation behavior assay.
Experiment	period	MV (95% CI lower-upper)	R*	n	P value
Fall Exp. Field	I	183.6 (211-162)	1.76	29	P < 0.001
	II	191.0 (235-153)	1.16	29	0.01 < P < 0.025
	III	158.1 (316.3-21.2)	0.34	29	0.5 < P < 0.9
	IV	354.3 (331.4-27.2)	1.49	29	0.001 < P < 0.005
	V	167.7 (191-146)	1.62	29	P < 0.001
Spring Exp. Field	I	347.4 (319.5-16.7)	1.59	28	P < 0.001
	II	319.1 (351-283)	1.39	28	0.001 < P < 0.005
	III	293.7 (33.6-201.3)	0.67	28	0.1 < P < 0.5
	IV	245.2 (309.4-193.2)	0.95	28	0.05 < P < 0.1
	V	343.8 (326.56-2.92)	1.84	28	P < 0.001
Fall Exp. Lab	I	182.9 (203-156)	1.77	27	P < 0.001
	II	184.9 (222-153)	1.31	27	0.005 < P < 0.01
	III	111.3 (203.9-36.6)	0.69	27	0.1 < P < 0.5
	IV	4.1 (350.7-19.3)	2.17	27	P < 0.001
	V	137.6 (189.9-94.9)	1.04	27	0.025 < P < 0.05
Fall Control	I	180.3 (196-164)	2.1	26	P < 0.001
	II	184.1 (199-167)	1.94	26	P < 0.001
	III	195.2 (219-160)	1.43	26	0.001 < P < 0.005
	IV	6.1 (28.8-340.4)	1.63	26	P < 0.001
	V	183.0 (205-162)	1.81	26	P < 0.001
Fall Exp. Dark	Control	218.48 (242-187)	1.5	31	0.001 < P < 0.005
	Dark	41.03 (178.51-5.31)	0.55	31	0.1 < P < 0.5
Exp. BMVC	I	114.51 (277-18.8)	0.32	30	0.5 < P < 0.9
	II	215.76 (284-119)	0.65	30	0.1 < P < 0.5
	III	105.72 (264.8-13.9)	0.31	30	0.5 < P < 0.9
	IV	191.21(284-119)	0.66	30	0.1 < P < 0.5
