# Supplementary material for: Geomagnetic and visual cues guide seasonal migratory orientation in the nocturnal fall armyworm, the world’s most invasive insect
Source: eLife. 2026 Apr 16;14:RP109098. doi: 10.7554/eLife.109098 (PMC13086496; doi:10.7554/eLife.109098)
Supplement: Supplementary file 2. [file elife-109098-supp2.xlsx]

## Sheet: Sheet1
Supplementary File 2. Friedman test results of Rayleigh’s r values across experimental
Experiment	Friedman chi-squared	df	P value
Spring Exp. Field	16.207	4	0.002753
Fall Exp. Field	1.1714	4	0.8828
Fall Exp. Lab	8.2154	4	0.084
Fall Control	1.952	4	0.7446
