# Supplementary material for: Geomagnetic and visual cues guide seasonal migratory orientation in the nocturnal fall armyworm, the world’s most invasive insect
Source: eLife. 2026 Apr 16;14:RP109098. doi: 10.7554/eLife.109098 (PMC13086496; doi:10.7554/eLife.109098)
Supplement: Supplementary file 3. [file elife-109098-supp3.xlsx]

## Sheet: Sheet1
Supplementary File 3. Pairwise comparison results of the mean Rayleigh's r values of Exp. Spring across different experimental phases, using the Wilcoxon signed rank test with multiple comparison correction performed by the Benjamini-Hochberg method.
Experiment	Comparison group	P value	W value
Spring Exp. Field	IV-V	0.1545	140
	III-V	0.1545	141
	II-V	0.0519	115
	I-V	0.0021	44
	III-IV	0.9153	184
	II-IV	0.5166	154
	I-IV	0.1545	84
	II-III	0.9153	210
	I-III	0.3691	122
	I-II	0.2615	116
