# Supplementary material for: Geomagnetic and visual cues guide seasonal migratory orientation in the nocturnal fall armyworm, the world’s most invasive insect
Source: eLife. 2026 Apr 16;14:RP109098. doi: 10.7554/eLife.109098 (PMC13086496; doi:10.7554/eLife.109098)
Supplement: Supplementary file 4. — Note: A: Fall Exp. Field; B: Fall Exp. Lab; C: Fall Control; D: Fall Exp. Dark I; E: Fall Exp. Dark II; F: Fall Exp. BMVC. [file elife-109098-supp4.xlsx]

## Sheet: Sheet1
Supplementary File 4. Multiple comparisons of mean Rayleigh test r values across experimental conditions using the Wilcoxon rank-sum test (adjusted by the Benjamini-Hochberg method).
Comparison	P value	W value
A vs B	0.32	9084
A vs C	0.01	7632
A vs D	0.54	2407
A vs E	<0.001	3252
A vs F	<0.001	17135
B vs C	0.22	7934
B vs D	0.26	2386
B vs E	<0.001	2958
B vs F	<0.001	15654
C vs D	0.0356	2543
C vs E	<0.001	3186
C vs F	<0.001	16450
D vs E	0.01	400
D vs F	<0.001	3477
E vs F	0.07	2843
Note: A: Fall Exp. Field; B: Fall Exp. Lab; C: Fall Control; D: Fall Exp. Dark I; E: Fall Exp. Dark II; F: Fall Exp. BMVC.
