# Supplementary material for: Geomagnetic and visual cues guide seasonal migratory orientation in the nocturnal fall armyworm, the world’s most invasive insect
Source: eLife. 2026 Apr 16;14:RP109098. doi: 10.7554/eLife.109098 (PMC13086496; doi:10.7554/eLife.109098)
Supplement: Supplementary file 5. — Note: A: Fall Exp. Field; B: Fall Exp. Lab; C: Fall Control; D: Fall Exp. Dark-I; E: Fall Exp. Dark-II; F: Fall Exp. BMVC. [file elife-109098-supp5.xlsx]

## Sheet: Sheet1
Supplementary File 5. Wilcoxon rank-sum test for mean angular velocity (directional change per second) across experimental conditions, adjusted by the Benjamini-Hochberg method.
Comparison group	P value	W value
A vs B	0.75	10006
A vs C	0.41	9967
A vs D	0.94	2227
A vs E	0	1479
A vs F	0	4237
B vs C	0.77	8957
B vs D	0.72	2005
B vs E	0	1376
B vs F	0	3890
C vs D	0.48	1850
C vs E	0	1119
C vs F	0	3199
D vs E	0.01	119
D vs F	0	929
E vs F	0.02	1332
Note: A: Fall Exp. Field; B: Fall Exp. Lab; C: Fall Control; D: Fall Exp. Dark-I; E: Fall Exp. Dark-II; F: Fall Exp. BMVC.
